# Supplementary material for: Distinct microglia alternative splicing in Alzheimer's disease
Source: Aging (Albany NY). 2022 Aug 23;14(16):6554–66. doi: 10.18632/aging.204223 (PMC9467408; doi:10.18632/aging.204223)
Supplement: Supplementary Table 1 [file aging-14-204223-s001.xlsx]

## Sheet: Supplementary Table 1
Supplementary Table 1. Significant AS events in this study.
ID	PValue	FDR	IncLevelDifference	GeneID	geneSymbol	type
3222	7.5e-11	2.18e-07	-0.106	ENSMUSG00000003363	Pld3	MXE
482	4.45e-09	1.23e-05	0.298	ENSMUSG00000071573	Rnls	SE
29753	1.63e-08	3.12e-05	0.304	ENSMUSG00000037395	Rcor3	SE
27133	2.43e-08	4.32e-05	0.135	ENSMUSG00000074141	Il4i1	SE
11960	4.29e-08	7.13e-05	-0.337	ENSMUSG00000023206	Il15ra	SE
34599	6.08e-08	9.48e-05	0.181	ENSMUSG00000017718	Afmid	SE
35224	1.26e-07	0.00018535	0.198	ENSMUSG00000024273	2700062C07Rik	SE
33	2.02e-07	0.000211321	-0.145	ENSMUSG00000024660	Incenp	A5SS
6279	1.72e-07	0.000237947	-0.26	ENSMUSG00000036061	Smug1	SE
3991	1.39e-07	0.000238041	0.15	ENSMUSG00000030316	Tamm41	A3SS
8156	1.9e-07	0.000249178	0.248	ENSMUSG00000042446	Zmym4	SE
18579	2.12e-07	0.000264692	0.113	ENSMUSG00000005102	Eif2ak4	SE
3756	2.6e-07	0.00029716	-0.167	ENSMUSG00000034343	Ube2f	A3SS
9339	3.03e-07	0.000359884	0.164	ENSMUSG00000075593	Gal3st4	SE
1739	3.26e-07	0.000369703	0.119	ENSMUSG00000024127	Prepl	SE
11962	6.9e-07	0.000717144	-0.169	ENSMUSG00000023206	Il15ra	SE
27992	7.21e-07	0.000719044	0.104	ENSMUSG00000030660	Pik3c2a	SE
16540	8.01e-07	0.000739746	-0.14	ENSMUSG00000033488	Cryzl2	SE
1605	2.91e-06	0.000782096	-0.127	ENSMUSG00000031167	Rbm3	RI
26071	1.31e-06	0.00112893	-0.38	ENSMUSG00000037860	Aim2	SE
16304	1.93e-06	0.00142748	-0.215	ENSMUSG00000061130	Ppm1b	SE
9703	2.42e-06	0.0015901	0.14	ENSMUSG00000029810	Tmem176b	SE
2020	2.34e-06	0.00163705	0.101	ENSMUSG00000038506	Dcun1d2	A5SS
1747	4.87e-06	0.00169965	0.196	ENSMUSG00000022788	Fgd4	A5SS
33742	3.56e-06	0.00216731	0.201	ENSMUSG00000016940	Kctd2	SE
680	5.77e-06	0.00219937	-0.141	ENSMUSG00000021235	Coq6	A3SS
29482	4.45e-06	0.00246841	0.124	ENSMUSG00000062866	Phactr2	SE
21027	5.51e-06	0.0029875	-0.118	ENSMUSG00000020707	Rnf135	SE
21281	6.19e-06	0.00321504	0.292	ENSMUSG00000093445	Lrch4	SE
4852	7.12e-06	0.00362567	-0.262	ENSMUSG00000047022	Mipol1	SE
3831	1.36e-05	0.00388785	-0.223	ENSMUSG00000000600	Krit1	A3SS
15367	8.19e-06	0.00408455	0.138	ENSMUSG00000060771	Tsga10	SE
12822	8.93e-06	0.00428635	-0.107	ENSMUSG00000020271	Fbxw11	SE
23845	8.94e-06	0.00428635	0.18	ENSMUSG00000036810	Cnep1r1	SE
24077	1.04e-05	0.00480329	0.131	ENSMUSG00000029920	Smarcad1	SE
29908	1.23e-05	0.00560104	-0.216	ENSMUSG00000010461	Eya4	SE
12296	1.28e-05	0.00571059	-0.29	ENSMUSG00000037426	Depdc5	SE
772	2.11e-05	0.00633223	0.124	ENSMUSG00000035173	Ccdc186	A5SS
20268	1.74e-05	0.00736832	0.112	ENSMUSG00000097585	E230029C05Rik	SE
13508	1.96e-05	0.00787257	0.154	ENSMUSG00000055897	Ppp4r1l-ps	SE
32464	1.95e-05	0.00787257	-0.193	ENSMUSG00000037697	Ddhd1	SE
13510	2.02e-05	0.00789141	0.157	ENSMUSG00000055897	Ppp4r1l-ps	SE
12294	2.23e-05	0.00855623	-0.259	ENSMUSG00000037426	Depdc5	SE
11524	2.3e-05	0.00869092	-0.37	ENSMUSG00000027200	Sema6d	SE
4056	3.49e-05	0.00922657	0.176	ENSMUSG00000067825	Pex26	A3SS
18829	2.54e-05	0.00932563	-0.143	ENSMUSG00000063108	Zfp26	SE
3513	2.65e-05	0.00959324	-0.137	ENSMUSG00000071714	Csf2rb2	SE
3926	8.27e-05	0.00977536	-0.101	ENSMUSG00000090841	Myl6	RI
33581	2.87e-05	0.00995773	0.211	ENSMUSG00000059890	Ube4a	SE
48	3.21e-05	0.0107485	0.169	ENSMUSG00000005986	Ankrd13d	SE
4751	4.97e-05	0.0113856	-0.197	ENSMUSG00000019823	Mical1	A3SS
160	3.66e-05	0.011465	0.109	ENSMUSG00000025036	Sfxn2	SE
22061	3.63e-05	0.011465	-0.106	ENSMUSG00000041977	Arhgef11	SE
21811	3.88e-05	0.0115339	0.265	ENSMUSG00000029635	Cdk8	SE
18444	4.51e-05	0.0125513	0.102	ENSMUSG00000039285	Azi2	SE
17509	5.02e-05	0.0133892	0.208	ENSMUSG00000033039	Micall1	SE
1378	0.000150902	0.0143892	0.135	ENSMUSG00000002413	Braf	RI
29864	6.84e-05	0.0174084	0.15	ENSMUSG00000021244	Ylpm1	SE
3289	6.98e-05	0.0175946	-0.11	ENSMUSG00000022357	Klhl38	SE
17196	7.16e-05	0.017687	0.104	ENSMUSG00000027285	Haus2	SE
6527	7.8e-05	0.0187097	0.223	ENSMUSG00000030322	Mbd4	SE
441	0.000319516	0.0214657	-0.155	ENSMUSG00000022550	Adck5	RI
11222	9.28e-05	0.0218431	0.129	ENSMUSG00000024505	Dtwd2	SE
3301	6.08e-05	0.0221301	0.25	ENSMUSG00000021709	Erbin	MXE
3329	0.000403077	0.0233548	-0.201	ENSMUSG00000073436	Eme2	RI
3292	0.000210751	0.0245407	-0.36	ENSMUSG00000032557	Uba5	A5SS
3754	0.000454663	0.0248886	0.144	ENSMUSG00000029510	Gpc2	RI
572	0.000165188	0.0257769	0.116	ENSMUSG00000056851	Pcbp2	A3SS
25330	0.000115446	0.0262154	-0.143	ENSMUSG00000048677	Tpcn2	SE
30152	0.00012112	0.0267365	0.217	ENSMUSG00000003847	Nfat5	SE
2461	0.000566955	0.0288951	0.164	ENSMUSG00000041263	Rusc1	RI
3373	0.000563982	0.0288951	0.199	ENSMUSG00000025207	Sema4g	RI
21508	0.000159732	0.0313728	0.163	ENSMUSG00000038637	Lrrc56	SE
11767	0.000161295	0.0314323	-0.142	ENSMUSG00000061981	Flot2	SE
58	0.000679418	0.0318787	0.121	ENSMUSG00000042729	Wdr74	RI
1250	0.000376701	0.0328985	-0.122	ENSMUSG00000032519	Slc25a38	A5SS
849	0.000758044	0.0335879	-0.132	ENSMUSG00000026034	Clk1	RI
939	0.000431449	0.0359705	-0.155	ENSMUSG00000049606	Zfp644	A5SS
24590	0.000211512	0.0387939	0.138	ENSMUSG00000035401	Emsy	SE
27346	0.000211371	0.0387939	-0.18	ENSMUSG00000029461	Fam168a	SE
22602	0.00022222	0.0404603	-0.232	ENSMUSG00000038775	Vill	SE
9291	0.000228437	0.0409104	-0.107	ENSMUSG00000021820	Camk2g	SE
11696	0.000230458	0.0409104	-0.263	ENSMUSG00000026737	Pip4k2a	SE
15649	0.000231253	0.0409104	-0.117	ENSMUSG00000045576	St7l	SE
873	0.000382892	0.0425243	0.227	ENSMUSG00000037997	Parp11	A3SS
23690	0.000247341	0.0431019	-0.122	ENSMUSG00000045411	2410002F23Rik	SE
30213	0.000248825	0.0431019	0.193	ENSMUSG00000097039	Pvt1	SE
21810	0.000259996	0.044118	0.152	ENSMUSG00000029635	Cdk8	SE
2075	0.000424832	0.0441954	0.212	ENSMUSG00000027206	Cops2	A3SS
11847	0.000265014	0.0443658	-0.113	ENSMUSG00000028634	Hivep3	SE
2867	0.000484246	0.0449301	-0.281	ENSMUSG00000031278	Acsl4	A3SS
4165	0.000528684	0.0453743	0.143	ENSMUSG00000029106	Add1	A3SS
34036	0.000277537	0.0457786	0.18	ENSMUSG00000038145	Snrk	SE
1627	0.000281349	0.0458691	0.323	ENSMUSG00000006705	Pknox1	SE
23687	0.000311388	0.0491599	-0.123	ENSMUSG00000045411	2410002F23Rik	SE
