# Supplementary material for: Distinct microglia alternative splicing in Alzheimer's disease
Source: Aging (Albany NY). 2022 Aug 23;14(16):6554–66. doi: 10.18632/aging.204223 (PMC9467408; doi:10.18632/aging.204223)
Supplement: Supplementary Table 2 [file aging-14-204223-s002.xlsx]

## Sheet: Supplementary Table 2
Supplementary Table 2. Dysregulated genes between APP and Ntg groups.
Gene	logFC	AveExpr	t	P.Value	adj.P.Val	B	change
ENSMUSG00000068129	5.4969	6.3121	23.7624	5.55274e-14	7.77995e-10	22.1846	UP
ENSMUSG00000002985	3.24992	11.2776	17.023	9.88468e-12	6.67174e-08	17.055	UP
ENSMUSG00000022265	3.04816	7.17561	16.258	1.9967e-11	6.67174e-08	16.5021	UP
ENSMUSG00000033350	2.45073	5.02158	16.0713	2.3809e-11	6.67174e-08	16.3766	UP
ENSMUSG00000112148	3.46528	3.57053	16.4701	1.63822e-11	6.67174e-08	16.3381	UP
ENSMUSG00000015568	3.73813	6.56569	14.9367	7.22939e-11	1.26614e-07	15.2427	UP
ENSMUSG00000032220	1.83274	6.10144	14.7462	8.77466e-11	1.34829e-07	15.0441	UP
ENSMUSG00000079293	3.35423	5.71069	14.4307	1.21514e-10	1.54776e-07	14.7583	UP
ENSMUSG00000030785	3.24229	2.7414	14.6561	9.62309e-11	1.34829e-07	14.4553	UP
ENSMUSG00000028459	2.10531	4.27623	14.1311	1.66496e-10	1.9099e-07	14.4376	UP
ENSMUSG00000025854	1.65341	5.26967	13.7007	2.64454e-10	2.63996e-07	13.9776	UP
ENSMUSG00000056367	4.60876	1.47763	15.3814	4.63809e-11	1.0558e-07	13.9759	UP
ENSMUSG00000056737	1.7131	6.23047	13.6398	2.8263e-10	2.63996e-07	13.8413	UP
ENSMUSG00000048058	4.19436	1.27658	15.2513	5.27484e-11	1.0558e-07	13.7983	UP
ENSMUSG00000040907	2.79464	5.40624	12.8346	6.97344e-10	4.84323e-07	13.0065	UP
ENSMUSG00000052688	4.79474	2.41319	13.3045	4.09353e-10	3.35508e-07	12.864	UP
ENSMUSG00000000682	1.46922	6.29688	12.7768	7.45397e-10	4.84323e-07	12.8395	UP
ENSMUSG00000035105	3.61694	1.87488	13.2584	4.31029e-10	3.35508e-07	12.7087	UP
ENSMUSG00000069792	3.91184	1.39496	13.4126	3.62971e-10	3.17849e-07	12.5258	UP
ENSMUSG00000027533	5.61729	0.774134	14.0724	1.77209e-10	1.9099e-07	12.2871	UP
ENSMUSG00000036067	2.436	3.50156	11.9666	1.94942e-09	1.17614e-06	11.9845	UP
ENSMUSG00000004552	4.59926	1.5846	12.7595	7.60481e-10	4.84323e-07	11.9752	UP
ENSMUSG00000030579	0.894753	9.85608	11.9396	2.01466e-09	1.17614e-06	11.5815	UP
ENSMUSG00000034353	1.72015	5.28976	11.6631	2.83284e-09	1.53188e-06	11.5749	UP
ENSMUSG00000002602	3.39399	7.06943	11.63	2.95202e-09	1.53188e-06	11.389	UP
ENSMUSG00000042429	2.17627	2.32285	11.6331	2.94071e-09	1.53188e-06	11.3637	UP
ENSMUSG00000036103	5.63997	0.373168	13.0054	5.73506e-10	4.22915e-07	11.1962	UP
ENSMUSG00000024640	1.5749	5.76468	11.2508	4.76714e-09	2.21598e-06	10.9898	UP
ENSMUSG00000006800	1.80299	4.87505	11.1328	5.5479e-09	2.42694e-06	10.9351	UP
ENSMUSG00000027712	1.29399	5.98189	11.2289	4.90296e-09	2.21598e-06	10.9339	UP
ENSMUSG00000038204	1.12154	4.82497	11.0965	5.81477e-09	2.42694e-06	10.884	UP
ENSMUSG00000031996	1.08815	7.76895	11.2872	4.55031e-09	2.19843e-06	10.8446	UP
ENSMUSG00000014599	1.84562	6.11824	11.0866	5.88937e-09	2.42694e-06	10.7379	UP
ENSMUSG00000021939	0.746216	12.3834	11.358	4.15786e-09	2.08057e-06	10.7248	UP
ENSMUSG00000027698	1.72092	5.36641	10.8672	7.84325e-09	2.97005e-06	10.5277	UP
ENSMUSG00000050370	4.76276	2.55102	10.8983	7.52909e-09	2.93028e-06	10.4121	UP
ENSMUSG00000021242	0.789217	8.92902	10.987	6.70351e-09	2.68351e-06	10.3716	UP
ENSMUSG00000030103	4.9128	2.54101	10.695	9.85156e-09	3.45075e-06	10.1572	UP
ENSMUSG00000018927	1.51999	7.8083	10.7733	8.87832e-09	3.18959e-06	10.1492	UP
ENSMUSG00000034593	1.92727	4.0969	10.4399	1.388e-08	4.74324e-06	10.0765	UP
ENSMUSG00000039313	3.87193	1.16995	10.7843	8.75009e-09	3.18959e-06	9.88544	UP
ENSMUSG00000050335	1.95873	3.01698	10.2342	1.83864e-08	5.60025e-06	9.79363	UP
ENSMUSG00000036402	0.701642	6.23507	10.4021	1.46125e-08	4.76129e-06	9.7773	UP
ENSMUSG00000045502	1.46488	4.92107	10.202	1.92218e-08	5.61652e-06	9.66189	UP
ENSMUSG00000025351	1.05115	8.67893	10.4039	1.45762e-08	4.76129e-06	9.57618	UP
ENSMUSG00000026285	1.776	5.00453	10.1182	2.15863e-08	6.17236e-06	9.53915	UP
ENSMUSG00000000982	2.3825	5.36072	9.99827	2.55193e-08	7.0108e-06	9.33724	UP
ENSMUSG00000030789	2.93592	4.74916	9.80722	3.3417e-08	8.83407e-06	9.15797	UP
ENSMUSG00000028121	3.54254	0.674395	10.2696	1.75138e-08	5.57694e-06	9.12954	UP
ENSMUSG00000007891	0.658702	13.5593	10.2013	1.92415e-08	5.61652e-06	9.08358	UP
ENSMUSG00000032294	0.754282	8.66518	10.047	2.38382e-08	6.67993e-06	9.06488	UP
ENSMUSG00000025190	0.95593	5.61127	9.75821	3.58321e-08	9.29711e-06	8.93037	UP
ENSMUSG00000040852	1.8956	3.38474	9.54196	4.89031e-08	1.10513e-05	8.85396	UP
ENSMUSG00000060802	0.758901	10.5657	9.92052	2.84656e-08	7.66983e-06	8.78981	UP
ENSMUSG00000011148	0.851954	5.50153	9.62898	4.31246e-08	1.01731e-05	8.75414	UP
ENSMUSG00000030329	4.38633	0.00137276	10.248	1.80409e-08	5.60025e-06	8.7008	UP
ENSMUSG00000031995	1.18443	6.53427	9.64651	4.20499e-08	1.01731e-05	8.65195	UP
ENSMUSG00000022351	2.05423	2.42134	9.38062	6.18795e-08	1.33384e-05	8.5776	UP
ENSMUSG00000029076	0.638478	8.27858	9.67956	4.01001e-08	1.01731e-05	8.54742	UP
ENSMUSG00000026207	0.873471	4.60751	9.39091	6.09527e-08	1.33384e-05	8.52072	UP
ENSMUSG00000006360	3.11667	2.26988	9.36706	6.31246e-08	1.34006e-05	8.51472	UP
ENSMUSG00000013698	0.682921	7.95072	9.62193	4.35646e-08	1.01731e-05	8.48396	UP
ENSMUSG00000003363	0.768575	8.73657	9.65513	4.15322e-08	1.01731e-05	8.48281	UP
ENSMUSG00000033880	1.46658	8.79135	9.62562	4.33339e-08	1.01731e-05	8.43615	UP
ENSMUSG00000026437	2.08906	2.95121	9.23566	7.66396e-08	1.55623e-05	8.41126	UP
ENSMUSG00000025289	1.03232	5.57491	9.33288	6.63797e-08	1.38813e-05	8.30106	UP
ENSMUSG00000025534	0.733383	9.24274	9.55021	4.83218e-08	1.10513e-05	8.29878	UP
ENSMUSG00000037242	1.82058	4.19416	9.15913	8.58842e-08	1.67128e-05	8.23734	UP
ENSMUSG00000021109	0.810914	7.6261	9.4071	5.95238e-08	1.32379e-05	8.18433	UP
ENSMUSG00000062082	2.34904	1.76953	9.16342	8.53357e-08	1.67128e-05	8.16819	UP
ENSMUSG00000038776	1.0044	5.26512	9.09051	9.51712e-08	1.82663e-05	7.97408	UP
ENSMUSG00000046223	1.39135	5.25321	9.06199	9.93369e-08	1.85574e-05	7.93554	UP
ENSMUSG00000079037	2.63144	2.21416	8.94337	1.18829e-07	2.1345e-05	7.92856	UP
ENSMUSG00000016427	1.08925	4.5529	8.90364	1.26224e-07	2.21066e-05	7.78848	UP
ENSMUSG00000024661	0.711274	10.0686	9.24031	7.6112e-08	1.55623e-05	7.7867	UP
ENSMUSG00000032193	3.16762	3.8136	8.81834	1.43783e-07	2.45579e-05	7.78155	UP
ENSMUSG00000040528	1.10708	4.39079	8.85067	1.36844e-07	2.36706e-05	7.7293	UP
ENSMUSG00000029648	4.6815	0.288918	9.21223	7.93528e-08	1.5883e-05	7.6689	UP
ENSMUSG00000034656	1.49931	3.56364	8.69489	1.73873e-07	2.87246e-05	7.58619	UP
ENSMUSG00000069516	1.6258	9.41714	9.06222	9.93021e-08	1.85574e-05	7.53867	UP
ENSMUSG00000045730	-0.449579	8.89116	-9.02812	1.04534e-07	1.90211e-05	7.51971	NOT
ENSMUSG00000041552	2.13239	2.82249	8.58582	2.05968e-07	3.31702e-05	7.44884	UP
ENSMUSG00000025743	1.42913	7.80495	8.91336	1.24371e-07	2.20577e-05	7.40546	UP
ENSMUSG00000024232	1.79989	2.19955	8.52941	2.24953e-07	3.54136e-05	7.33526	UP
ENSMUSG00000021665	-0.38864	13.4612	-9.02909	1.04382e-07	1.90211e-05	7.3228	NOT
ENSMUSG00000037868	3.16019	2.54287	8.48237	2.42187e-07	3.72889e-05	7.27594	UP
ENSMUSG00000032231	3.66979	1.93295	8.53238	2.23909e-07	3.54136e-05	7.27442	UP
ENSMUSG00000020841	0.826282	6.44062	8.69344	1.74263e-07	2.87246e-05	7.18914	UP
ENSMUSG00000022010	1.83222	3.44969	8.36924	2.89558e-07	4.36236e-05	7.0908	UP
ENSMUSG00000024529	4.86731	1.34409	8.50328	2.34361e-07	3.64849e-05	7.07234	UP
ENSMUSG00000009687	2.1056	3.52437	8.33047	3.07951e-07	4.59011e-05	7.02645	UP
ENSMUSG00000021508	3.63851	-0.0531586	8.6126	1.97553e-07	3.2185e-05	6.86503	UP
ENSMUSG00000056413	0.761543	5.58198	8.279	3.34282e-07	4.87878e-05	6.63432	UP
ENSMUSG00000031799	0.710745	5.68128	8.26541	3.41624e-07	4.93453e-05	6.59727	UP
ENSMUSG00000017724	4.08064	-1.17614	8.81069	1.45479e-07	2.45579e-05	6.57352	UP
ENSMUSG00000032076	0.850522	8.22122	8.39499	2.77983e-07	4.2335e-05	6.53694	UP
ENSMUSG00000025795	1.02304	4.91072	8.15479	4.08028e-07	5.55037e-05	6.53463	UP
ENSMUSG00000040479	0.47831	8.09676	8.32362	3.11325e-07	4.59155e-05	6.42893	NOT
ENSMUSG00000041120	1.38135	3.95048	7.98188	5.40277e-07	7.20936e-05	6.40314	UP
ENSMUSG00000041697	0.572227	6.49826	8.17816	3.9295e-07	5.44449e-05	6.34025	NOT
ENSMUSG00000047798	3.14623	2.10174	7.88366	6.34757e-07	8.36033e-05	6.33241	UP
ENSMUSG00000028416	0.584252	6.75698	8.1728	3.96358e-07	5.44449e-05	6.30042	NOT
ENSMUSG00000022415	0.69515	8.49603	8.2493	3.5054e-07	5.01165e-05	6.27747	UP
ENSMUSG00000040883	1.53913	2.2703	7.7739	7.61146e-07	9.52179e-05	6.17603	UP
ENSMUSG00000026249	0.595201	10.549	8.23771	3.5711e-07	5.05401e-05	6.15374	UP
ENSMUSG00000037936	0.584975	6.7329	8.08142	4.59435e-07	6.18956e-05	6.15014	UP
ENSMUSG00000020532	1.80198	2.83942	7.74324	8.00957e-07	9.84404e-05	6.12097	UP
ENSMUSG00000018774	0.472451	10.4038	8.18948	3.85861e-07	5.4063e-05	6.08035	NOT
ENSMUSG00000022463	0.712386	5.69876	7.88013	6.38466e-07	8.36033e-05	5.94967	UP
ENSMUSG00000018930	1.91066	4.87382	7.70563	8.52813e-07	0.000102126	5.8029	UP
ENSMUSG00000033307	1.05442	5.19182	7.73076	8.17792e-07	9.87766e-05	5.77546	UP
ENSMUSG00000041736	0.865196	5.49597	7.73339	8.14216e-07	9.87766e-05	5.73029	UP
ENSMUSG00000004530	0.466037	7.18827	7.8446	6.77009e-07	8.78294e-05	5.70018	NOT
ENSMUSG00000028874	1.28361	3.14909	7.48742	1.23166e-06	0.000143806	5.67132	UP
ENSMUSG00000025203	0.773094	7.26073	7.83183	6.9145e-07	8.88799e-05	5.67027	UP
ENSMUSG00000030474	-0.564233	6.85151	-7.76187	7.76511e-07	9.62805e-05	5.6091	NOT
ENSMUSG00000039942	2.97056	1.98948	7.41565	1.39184e-06	0.000156448	5.58269	UP
ENSMUSG00000022246	2.21256	1.92898	7.40402	1.41977e-06	0.000157877	5.56587	UP
ENSMUSG00000025324	2.92761	1.27198	7.414	1.39576e-06	0.000156448	5.51846	UP
ENSMUSG00000026177	0.479859	8.97348	7.78174	7.51288e-07	9.48315e-05	5.45708	NOT
ENSMUSG00000029338	1.71288	2.19931	7.31541	1.6529e-06	0.000171684	5.42802	UP
ENSMUSG00000079017	2.87789	3.46743	7.31495	1.65422e-06	0.000171684	5.37189	UP
ENSMUSG00000036353	-0.465705	12.4938	-7.80643	7.2114e-07	9.18536e-05	5.34188	NOT
ENSMUSG00000035778	-0.522076	7.11834	-7.6236	9.78455e-07	0.000115203	5.33849	NOT
ENSMUSG00000025068	0.749571	4.92568	7.44702	1.3193e-06	0.000150282	5.3276	UP
ENSMUSG00000096971	2.56228	-0.240967	7.47228	1.26374e-06	0.000145134	5.30559	UP
ENSMUSG00000035376	0.66343	5.43206	7.47975	1.2478e-06	0.000144487	5.30086	UP
ENSMUSG00000032018	0.777897	4.89854	7.37904	1.48178e-06	0.000162197	5.21324	UP
ENSMUSG00000016256	0.501367	11.2636	7.67935	8.91112e-07	0.000105808	5.16905	NOT
ENSMUSG00000062997	0.817805	3.99091	7.2445	1.86815e-06	0.000191056	5.13525	UP
ENSMUSG00000036875	2.01755	3.45092	7.18852	2.0587e-06	0.000205542	5.1337	UP
ENSMUSG00000003418	1.44629	5.28248	7.35995	1.5311e-06	0.000165017	5.1212	UP
ENSMUSG00000035311	0.635919	5.62043	7.36207	1.52554e-06	0.000165017	5.06401	UP
ENSMUSG00000029614	0.5078	5.93026	7.3842	1.46875e-06	0.000162036	5.05604	NOT
ENSMUSG00000022887	1.1098	4.76706	7.2707	1.7854e-06	0.000183935	5.04761	UP
ENSMUSG00000057863	0.76249	4.68451	7.1858	2.06847e-06	0.000205542	4.90911	UP
ENSMUSG00000030657	2.21102	2.06575	6.99073	2.91137e-06	0.000268363	4.88226	UP
ENSMUSG00000000278	0.491893	7.37799	7.32656	1.62148e-06	0.000170816	4.77614	NOT
ENSMUSG00000019066	1.18467	2.96695	6.93548	3.21033e-06	0.000288333	4.73705	UP
ENSMUSG00000028692	0.493698	8.52979	7.33521	1.59754e-06	0.000169569	4.69976	NOT
ENSMUSG00000063286	0.649713	6.37427	7.214	1.96957e-06	0.000199968	4.68849	UP
ENSMUSG00000095742	1.00051	3.69869	6.959	3.07932e-06	0.00027848	4.67894	UP
ENSMUSG00000093674	0.809435	5.65533	7.10744	2.37143e-06	0.000227576	4.60364	UP
ENSMUSG00000029207	0.753597	6.49224	7.16125	2.15877e-06	0.000212463	4.57794	UP
ENSMUSG00000032353	0.470958	7.23196	7.20708	1.99339e-06	0.000200931	4.57648	NOT
ENSMUSG00000039007	1.22651	4.58134	6.97973	2.96845e-06	0.000271836	4.56277	UP
ENSMUSG00000073490	2.48933	2.75934	6.81258	3.99599e-06	0.000349924	4.55098	UP
ENSMUSG00000004709	1.65447	2.89223	6.82362	3.91782e-06	0.000345236	4.54998	UP
ENSMUSG00000038642	0.331757	12.8342	7.34167	1.57991e-06	0.000168978	4.50911	NOT
ENSMUSG00000021886	1.4057	3.29604	6.82483	3.90937e-06	0.000345236	4.50251	UP
ENSMUSG00000027523	1.21922	2.79203	6.78528	4.19627e-06	0.000362925	4.48913	UP
ENSMUSG00000031818	0.554633	6.93941	7.12603	2.29558e-06	0.000221816	4.46073	NOT
ENSMUSG00000029598	0.39691	7.54596	7.15868	2.16846e-06	0.000212463	4.45986	NOT
ENSMUSG00000041453	0.671021	5.98145	7.04103	2.66443e-06	0.000250546	4.43299	UP
ENSMUSG00000017716	1.6474	1.11907	6.73453	4.59693e-06	0.000392729	4.41106	UP
ENSMUSG00000063229	0.601395	7.94632	7.13464	2.26133e-06	0.000220024	4.38133	UP
ENSMUSG00000011884	0.435846	7.75133	7.09684	2.41586e-06	0.000230263	4.32961	NOT
ENSMUSG00000027506	0.501674	7.20226	7.033	2.70231e-06	0.000252414	4.26421	NOT
ENSMUSG00000001467	0.816192	4.76299	6.82687	3.89515e-06	0.000345236	4.24725	UP
ENSMUSG00000000594	0.438689	8.51073	7.06071	2.57386e-06	0.000243665	4.20632	NOT
ENSMUSG00000052776	2.14793	3.43114	6.64374	5.41631e-06	0.000446399	4.17067	UP
ENSMUSG00000068758	1.94502	1.86574	6.54638	6.46597e-06	0.00051069	4.11597	UP
ENSMUSG00000025993	-0.501565	8.60796	-7.00856	2.82121e-06	0.000261775	4.11234	NOT
ENSMUSG00000090894	1.60791	1.90865	6.51506	6.84704e-06	0.000526072	4.06018	UP
ENSMUSG00000053716	-0.38518	8.5352	-6.95874	3.08075e-06	0.00027848	4.02464	NOT
ENSMUSG00000047215	0.704307	5.69335	6.79196	4.14636e-06	0.000360836	4.02216	UP
ENSMUSG00000005087	2.04068	1.45569	6.45699	7.61667e-06	0.000558729	3.95556	UP
ENSMUSG00000040276	1.6632	3.54328	6.52625	6.7083e-06	0.000519282	3.92869	UP
ENSMUSG00000008668	0.706792	5.42593	6.71676	4.74648e-06	0.000403048	3.92715	UP
ENSMUSG00000047881	0.905968	3.78268	6.54452	6.48796e-06	0.00051069	3.91098	UP
ENSMUSG00000041841	0.711601	5.41454	6.69801	4.90978e-06	0.000411922	3.8943	UP
ENSMUSG00000015340	2.0221	4.35955	6.56044	6.30221e-06	0.000510406	3.8583	UP
ENSMUSG00000073987	0.660271	5.60774	6.68841	4.99565e-06	0.000416631	3.84437	UP
ENSMUSG00000036585	1.59046	1.99193	6.35013	9.27737e-06	0.000643491	3.76491	UP
ENSMUSG00000032911	4.46868	0.445209	6.40502	8.38187e-06	0.000597506	3.76336	UP
ENSMUSG00000040751	0.457737	7.26734	6.76128	4.38106e-06	0.000376583	3.75792	NOT
ENSMUSG00000042712	0.683888	4.3081	6.50681	6.95129e-06	0.000526457	3.74125	UP
ENSMUSG00000029561	2.16173	4.43767	6.48172	7.27853e-06	0.000542444	3.70321	UP
ENSMUSG00000038179	3.49028	0.556831	6.33831	9.48288e-06	0.00064812	3.68201	UP
ENSMUSG00000029640	0.520788	6.15951	6.63561	5.49676e-06	0.000450381	3.65982	NOT
ENSMUSG00000031246	1.01615	3.37651	6.36555	9.01621e-06	0.000631106	3.64962	UP
ENSMUSG00000025492	2.03028	4.1957	6.43103	7.98943e-06	0.00057701	3.64857	UP
ENSMUSG00000064109	0.93295	3.49843	6.37308	8.89147e-06	0.000629184	3.64291	UP
ENSMUSG00000091649	0.940149	4.61673	6.47275	7.3993e-06	0.000548527	3.6191	UP
ENSMUSG00000032518	0.677193	5.61136	6.55358	6.38158e-06	0.00051069	3.59181	UP
ENSMUSG00000028362	1.67948	3.50359	6.3305	9.62125e-06	0.000652753	3.57178	UP
ENSMUSG00000045594	0.58755	7.07352	6.65093	5.3462e-06	0.000443228	3.57149	UP
ENSMUSG00000026558	2.41105	0.376543	6.27744	1.06188e-05	0.000708474	3.57047	UP
ENSMUSG00000031604	0.582607	5.68742	6.53562	6.59441e-06	0.000515584	3.54596	NOT
ENSMUSG00000039316	1.25202	4.74873	6.43953	7.86526e-06	0.000571848	3.53576	UP
ENSMUSG00000040952	0.783688	5.67713	6.50332	6.99581e-06	0.00052698	3.48622	UP
ENSMUSG00000033467	0.978259	6.01278	6.50914	6.92174e-06	0.000526457	3.44434	UP
ENSMUSG00000030447	-0.276304	10.4498	-6.70155	4.87855e-06	0.000411767	3.44412	NOT
ENSMUSG00000029592	0.594143	4.71728	6.36698	8.99233e-06	0.000631106	3.39991	UP
ENSMUSG00000024608	0.718026	6.40589	6.51314	6.87111e-06	0.000526072	3.39379	UP
ENSMUSG00000034854	0.546167	6.25554	6.49499	7.10351e-06	0.000532232	3.38121	NOT
ENSMUSG00000103174	1.47478	1.32108	6.12448	1.41425e-05	0.000900687	3.36789	UP
ENSMUSG00000001751	0.360904	8.77753	6.56245	6.27917e-06	0.000510406	3.26559	NOT
ENSMUSG00000057841	0.955714	6.04793	6.41569	8.21845e-06	0.000590506	3.26194	UP
ENSMUSG00000019942	1.23322	2.39117	6.06714	1.57593e-05	0.000981346	3.22232	UP
ENSMUSG00000045128	0.622115	7.12688	6.46125	7.55725e-06	0.000557287	3.20802	UP
ENSMUSG00000031137	0.982647	3.83496	6.16253	1.31656e-05	0.000850062	3.18589	UP
ENSMUSG00000017466	0.301779	10.1927	6.5539	6.37787e-06	0.00051069	3.17614	NOT
ENSMUSG00000003644	-0.36435	10.1158	-6.53319	6.62373e-06	0.000515584	3.14393	NOT
ENSMUSG00000036362	-0.462659	11.2997	-6.54897	6.43553e-06	0.00051069	3.11767	NOT
ENSMUSG00000025810	0.485967	7.84844	6.43871	7.87714e-06	0.000571848	3.09763	NOT
ENSMUSG00000064351	0.558122	7.57815	6.40377	8.40116e-06	0.000597506	3.05451	NOT
ENSMUSG00000099974	1.27415	1.27854	5.94808	1.97588e-05	0.00118816	3.05114	UP
ENSMUSG00000025465	0.533201	6.52197	6.32251	9.76505e-06	0.00065778	3.01598	NOT
ENSMUSG00000035885	0.490323	5.91112	6.2731	1.0705e-05	0.000710841	3.01183	NOT
ENSMUSG00000018819	0.698822	6.86405	6.3412	9.43221e-06	0.000647817	3.00842	UP
ENSMUSG00000029455	0.69547	6.25067	6.28533	1.04639e-05	0.00070148	2.98235	UP
ENSMUSG00000002014	0.499696	7.03316	6.32924	9.64384e-06	0.000652753	2.9669	NOT
ENSMUSG00000034892	0.74448	5.66973	6.20289	1.22057e-05	0.000802293	2.91519	UP
ENSMUSG00000025586	3.22604	0.742599	5.87976	2.25161e-05	0.00131447	2.90935	UP
ENSMUSG00000026080	1.19255	3.3729	5.95592	1.94655e-05	0.00117556	2.87822	UP
ENSMUSG00000038418	1.48176	3.27921	5.92369	2.07003e-05	0.0012332	2.8364	UP
ENSMUSG00000030986	0.464592	6.20583	6.19274	1.24399e-05	0.000806925	2.81175	NOT
ENSMUSG00000024669	2.27625	0.829572	5.78645	2.69417e-05	0.0015039	2.75005	UP
ENSMUSG00000017760	0.297607	11.2263	6.34139	9.42886e-06	0.000647817	2.72165	NOT
ENSMUSG00000084932	2.69104	-1.28616	5.92053	2.0826e-05	0.0012332	2.71808	UP
ENSMUSG00000021830	0.483237	6.04373	6.13038	1.39863e-05	0.000894803	2.71586	NOT
ENSMUSG00000052336	-0.462111	12.7977	-6.3633	9.05377e-06	0.000631106	2.70057	NOT
ENSMUSG00000036040	-1.11804	3.34446	-5.81927	2.52906e-05	0.0014346	2.66302	DOWN
ENSMUSG00000018585	0.551245	5.86253	6.08803	1.51491e-05	0.000947566	2.6622	NOT
ENSMUSG00000022216	0.426541	6.99484	6.15566	1.33367e-05	0.000857159	2.63711	NOT
ENSMUSG00000068523	0.513572	5.41045	6.02895	1.69415e-05	0.00104108	2.62401	NOT
ENSMUSG00000049517	0.786295	5.61717	6.04681	1.63776e-05	0.00101534	2.62204	UP
ENSMUSG00000037563	0.69079	4.2214	5.91028	2.12381e-05	0.00125028	2.62201	UP
ENSMUSG00000041488	0.997975	2.70377	5.76037	2.8333e-05	0.00155068	2.60775	UP
ENSMUSG00000026958	0.909041	6.66986	6.09187	1.50397e-05	0.000944937	2.55139	UP
ENSMUSG00000071415	0.711326	4.74793	5.91968	2.08598e-05	0.0012332	2.53391	UP
ENSMUSG00000005054	0.68568	5.33199	5.96292	1.92074e-05	0.00117006	2.50839	UP
ENSMUSG00000023992	0.398384	11.0059	6.22137	1.17906e-05	0.000779235	2.50019	NOT
ENSMUSG00000059291	0.575159	5.37059	5.95979	1.93223e-05	0.00117197	2.49583	NOT
ENSMUSG00000020009	-0.362378	10.3587	-6.19669	1.23482e-05	0.000804703	2.48725	NOT
ENSMUSG00000031785	-0.450819	10.7598	-6.20078	1.2254e-05	0.000802293	2.47613	NOT
ENSMUSG00000086109	2.3222	-0.253841	5.66415	3.41444e-05	0.00177731	2.45676	UP
ENSMUSG00000038872	-0.403014	7.85124	-6.09611	1.49197e-05	0.000941622	2.44606	NOT
ENSMUSG00000001418	0.352878	8.16538	6.10907	1.45593e-05	0.000923033	2.43806	NOT
ENSMUSG00000049871	3.51994	-0.764208	5.68578	3.27389e-05	0.001718	2.41928	UP
ENSMUSG00000007892	0.721364	5.67632	5.94332	1.99388e-05	0.00119385	2.41012	UP
ENSMUSG00000001918	0.89298	3.50941	5.71079	3.11872e-05	0.00166146	2.37756	UP
ENSMUSG00000072572	1.96445	-0.734306	5.63972	3.58081e-05	0.00182764	2.3567	UP
ENSMUSG00000021087	-0.33597	7.29901	-6.00324	1.77889e-05	0.00108838	2.31665	NOT
ENSMUSG00000073489	1.65318	3.99193	5.7002	3.18345e-05	0.00168912	2.27387	UP
ENSMUSG00000090675	1.23586	2.26937	5.55764	4.20363e-05	0.00206656	2.2718	UP
ENSMUSG00000042622	2.6532	-0.310884	5.5551	4.22462e-05	0.00206962	2.26076	UP
ENSMUSG00000045294	1.11182	3.40031	5.63792	3.59333e-05	0.00182764	2.25673	UP
ENSMUSG00000046330	0.795831	5.22926	5.82433	2.50453e-05	0.00142646	2.25513	UP
ENSMUSG00000022636	2.72072	-0.452035	5.52793	4.45585e-05	0.00213314	2.19815	UP
ENSMUSG00000032959	0.528137	5.09416	5.77724	2.74246e-05	0.00151278	2.18811	NOT
ENSMUSG00000066861	2.83469	-0.0995123	5.50059	4.70172e-05	0.00224067	2.18414	UP
ENSMUSG00000039782	0.624516	5.73843	5.827	2.49168e-05	0.00142493	2.17132	UP
ENSMUSG00000032434	-0.458242	10.7711	-6.0379	1.66565e-05	0.00102808	2.15825	NOT
ENSMUSG00000037337	1.17761	2.36644	5.49818	4.72408e-05	0.0022437	2.14614	UP
ENSMUSG00000026832	1.41484	1.96433	5.47665	4.92851e-05	0.00232503	2.14595	UP
ENSMUSG00000017404	0.677421	5.50952	5.77293	2.76537e-05	0.00151944	2.1035	UP
ENSMUSG00000014294	0.486865	5.3425	5.74396	2.92468e-05	0.00158215	2.07671	NOT
ENSMUSG00000030691	-0.389438	7.50979	-5.89118	2.2029e-05	0.00129141	2.07587	NOT
ENSMUSG00000041607	0.479881	5.51705	5.75491	2.86335e-05	0.00156103	2.06751	NOT
ENSMUSG00000059326	0.755208	7.12125	5.86349	2.32296e-05	0.0013505	2.05024	UP
ENSMUSG00000037820	-0.553274	6.51701	-5.80621	2.59346e-05	0.00145931	2.03008	NOT
ENSMUSG00000009927	0.630921	5.17004	5.69838	3.19476e-05	0.00168912	2.01722	UP
ENSMUSG00000025161	0.560841	6.35405	5.79169	2.66706e-05	0.00149472	2.00495	NOT
ENSMUSG00000028080	-0.677727	5.40613	-5.69346	3.22538e-05	0.0016989	1.9946	DOWN
ENSMUSG00000068245	0.672377	4.79177	5.63694	3.60023e-05	0.00182764	1.96828	UP
ENSMUSG00000020388	-0.430354	6.56764	-5.7783	2.73688e-05	0.00151278	1.96402	NOT
ENSMUSG00000064339	0.634085	8.05658	5.85996	2.33879e-05	0.00135408	1.95646	UP
ENSMUSG00000000740	0.650323	7.50543	5.83214	2.46718e-05	0.00141671	1.94945	UP
ENSMUSG00000026385	0.646106	4.55064	5.60161	3.85718e-05	0.00191642	1.94695	UP
ENSMUSG00000064043	1.8633	0.0778082	5.34342	6.41453e-05	0.00283323	1.91861	UP
ENSMUSG00000009731	-0.347005	6.92645	-5.77855	2.73553e-05	0.00151278	1.91583	NOT
ENSMUSG00000015396	0.507482	8.29257	5.83855	2.43696e-05	0.00140511	1.89635	NOT
ENSMUSG00000014313	0.495323	5.20804	5.6048	3.83319e-05	0.00191642	1.82462	NOT
ENSMUSG00000052155	-0.599569	4.72602	-5.53641	4.38229e-05	0.00212458	1.81084	DOWN
ENSMUSG00000057135	0.935592	2.63833	5.34283	6.42196e-05	0.00283323	1.80682	UP
ENSMUSG00000030744	0.50284	7.01841	5.72635	3.02606e-05	0.00162445	1.79021	NOT
ENSMUSG00000074151	1.25939	3.93283	5.44717	5.22345e-05	0.00239953	1.7749	UP
ENSMUSG00000001783	0.315295	7.18499	5.71599	3.08748e-05	0.00165109	1.75257	NOT
ENSMUSG00000032399	0.473313	7.88082	5.74633	2.91131e-05	0.00158102	1.746	NOT
ENSMUSG00000037922	-0.606054	6.05062	-5.60936	3.79926e-05	0.00190794	1.71117	DOWN
ENSMUSG00000007613	-0.316371	10.9801	-5.81248	2.5623e-05	0.0014476	1.70264	NOT
ENSMUSG00000002068	1.93563	-0.691118	5.24918	7.73901e-05	0.00327587	1.6908	UP
ENSMUSG00000028412	0.630182	5.92161	5.59218	3.92889e-05	0.00194515	1.67392	UP
ENSMUSG00000026072	1.81129	2.06799	5.23478	7.96511e-05	0.00333791	1.67013	UP
ENSMUSG00000033082	2.25539	1.34729	5.20403	8.47056e-05	0.0034575	1.66688	UP
ENSMUSG00000041538	0.4264	6.18222	5.60292	3.8473e-05	0.00191642	1.65523	NOT
ENSMUSG00000036427	0.568432	6.79989	5.64522	3.54263e-05	0.00182485	1.65359	NOT
ENSMUSG00000000673	0.66915	4.22797	5.41963	5.51547e-05	0.00249282	1.65159	UP
ENSMUSG00000026548	0.564296	6.77389	5.6408	3.57325e-05	0.00182764	1.648	NOT
ENSMUSG00000042659	0.58871	5.33865	5.52736	4.46085e-05	0.00213314	1.64491	UP
ENSMUSG00000050708	0.434091	8.87959	5.72989	3.0054e-05	0.00161956	1.64165	NOT
ENSMUSG00000012819	-0.433534	7.44842	-5.66257	3.42497e-05	0.00177731	1.62842	NOT
ENSMUSG00000038900	0.586851	4.7146	5.45693	5.12381e-05	0.00237638	1.62447	UP
ENSMUSG00000012848	0.629897	5.57742	5.52978	4.4397e-05	0.00213314	1.607	UP
ENSMUSG00000066621	0.415203	6.46274	5.5824	4.00473e-05	0.00197572	1.5728	NOT
ENSMUSG00000023456	0.705936	7.12823	5.61424	3.76323e-05	0.00189664	1.55322	UP
ENSMUSG00000067212	0.527175	8.13336	5.65482	3.47699e-05	0.00179764	1.54231	NOT
ENSMUSG00000025508	0.647855	5.153	5.45384	5.15519e-05	0.00237638	1.53146	UP
ENSMUSG00000096145	0.585833	3.7774	5.29194	7.10619e-05	0.00307299	1.49314	UP
ENSMUSG00000079435	0.882794	3.3846	5.24477	7.8075e-05	0.00329491	1.47998	UP
ENSMUSG00000021556	-0.322445	10.6862	-5.68072	3.30622e-05	0.00172849	1.45399	NOT
ENSMUSG00000019850	-0.393089	6.69883	-5.53114	4.42786e-05	0.00213314	1.45107	NOT
ENSMUSG00000052056	-0.579607	3.69297	-5.23971	7.88696e-05	0.00331844	1.43484	NOT
ENSMUSG00000015980	1.51318	0.846382	5.07251	0.000110351	0.00423597	1.43156	UP
ENSMUSG00000090841	0.381839	6	5.47039	4.98964e-05	0.00233812	1.41798	NOT
ENSMUSG00000050965	-0.60126	4.91957	-5.35486	6.2704e-05	0.00278903	1.4076	DOWN
ENSMUSG00000029777	0.342119	6.50402	5.48097	4.88677e-05	0.00231313	1.36343	NOT
ENSMUSG00000022102	1.42593	0.717253	5.03356	0.000119389	0.00448461	1.35974	UP
ENSMUSG00000031146	2.34828	-1.28637	5.09505	0.000105447	0.00407002	1.35727	UP
ENSMUSG00000005881	0.348879	7.90215	5.5367	4.37982e-05	0.00212458	1.32462	NOT
ENSMUSG00000033192	-0.346617	10.7982	-5.61432	3.76262e-05	0.00189664	1.31541	NOT
ENSMUSG00000038633	0.377148	6.55009	5.45375	5.15608e-05	0.00237638	1.30176	NOT
ENSMUSG00000025153	0.733025	5.10996	5.33133	6.57037e-05	0.00286864	1.292	UP
ENSMUSG00000028494	0.67706	5.40026	5.3559	6.25754e-05	0.00278903	1.2875	UP
ENSMUSG00000026456	0.47256	6.2682	5.42582	5.44833e-05	0.00247044	1.28507	NOT
ENSMUSG00000057315	0.62892	5.16687	5.33075	6.57798e-05	0.00286864	1.2801	UP
ENSMUSG00000067288	0.799856	3.64113	5.15625	9.32267e-05	0.00370028	1.24839	UP
ENSMUSG00000016496	0.791532	4.1213	5.19282	8.66302e-05	0.00350802	1.21755	UP
ENSMUSG00000064210	-0.328597	7.1095	-5.43582	5.3418e-05	0.00244588	1.2063	NOT
ENSMUSG00000067274	0.395759	7.44246	5.45562	5.13707e-05	0.00237638	1.20249	NOT
ENSMUSG00000026672	0.924889	2.92934	5.06091	0.000112968	0.00430106	1.1982	UP
ENSMUSG00000025794	0.689386	6.17695	5.37608	6.01198e-05	0.00270848	1.19724	UP
ENSMUSG00000098112	-0.35467	10.1468	-5.53795	4.36908e-05	0.00212458	1.1937	NOT
ENSMUSG00000026728	1.25554	2.13086	4.99164	0.00012997	0.00479212	1.1825	UP
ENSMUSG00000034641	1.51878	0.180667	4.93776	0.000144998	0.00512765	1.17797	UP
ENSMUSG00000034993	1.32518	-0.334842	4.94475	0.000142951	0.00510939	1.17276	UP
ENSMUSG00000085376	-1.21239	1.41973	-4.94147	0.000143907	0.00512765	1.16921	DOWN
ENSMUSG00000057329	1.00443	3.68719	5.12024	0.000100229	0.00396205	1.16624	UP
ENSMUSG00000054404	1.88593	3.00781	5.04677	0.000116243	0.00438997	1.1658	UP
ENSMUSG00000040483	0.978788	4.16887	5.16931	9.08144e-05	0.00365632	1.16062	UP
ENSMUSG00000057666	0.60404	8.42399	5.47107	4.98298e-05	0.00233812	1.15024	UP
ENSMUSG00000029178	-0.305356	8.24599	-5.45774	5.11567e-05	0.00237638	1.14302	NOT
ENSMUSG00000103043	-0.77516	2.77139	-4.99935	0.000127953	0.00474271	1.13217	DOWN
ENSMUSG00000000555	0.384575	6.17054	5.34217	6.43043e-05	0.00283323	1.131	NOT
ENSMUSG00000028495	0.575731	5.82282	5.30702	6.89598e-05	0.00299132	1.11468	NOT
ENSMUSG00000038274	0.595963	5.48111	5.27503	7.34989e-05	0.00315887	1.10901	UP
ENSMUSG00000035840	-0.555153	4.74307	-5.18789	8.74904e-05	0.00353264	1.10275	NOT
ENSMUSG00000063193	1.8194	1.62438	4.91312	0.000152456	0.00534016	1.08287	UP
ENSMUSG00000036931	-0.574026	4.22344	-5.11946	0.000100387	0.00396205	1.07763	NOT
ENSMUSG00000061983	0.83273	4.03906	5.11072	0.000102169	0.00400582	1.06889	UP
ENSMUSG00000026701	0.556076	5.08314	5.21237	8.33029e-05	0.00344647	1.05583	NOT
ENSMUSG00000044548	1.40269	1.31941	4.88666	0.000160902	0.00553907	1.05369	UP
ENSMUSG00000008683	0.735476	4.04538	5.10394	0.000103573	0.00403101	1.05354	UP
ENSMUSG00000030605	0.571626	5.56846	5.25128	7.70663e-05	0.00327205	1.04511	NOT
ENSMUSG00000051586	-0.632409	3.83596	-5.05732	0.00011379	0.00432062	1.03851	DOWN
ENSMUSG00000020865	-0.341378	9.16479	-5.43406	5.36037e-05	0.00244639	1.03453	NOT
ENSMUSG00000040713	0.335221	9.07885	5.42993	5.40427e-05	0.00245842	1.0267	NOT
ENSMUSG00000003429	0.544563	5.47719	5.23379	7.98087e-05	0.00333791	1.02594	NOT
ENSMUSG00000029304	2.09093	4.35768	5.10606	0.000103132	0.00402503	1.02454	UP
ENSMUSG00000029096	0.947403	5.28732	5.20861	8.39333e-05	0.00344647	1.00918	UP
ENSMUSG00000056313	1.11878	2.67372	4.93938	0.000144522	0.00512765	0.998618	UP
ENSMUSG00000038172	-0.468926	5.48922	-5.21015	8.36746e-05	0.00344647	0.996503	NOT
ENSMUSG00000044533	0.580176	5.86118	5.25207	7.69451e-05	0.00327205	0.996242	NOT
ENSMUSG00000090733	0.654783	5.3944	5.20746	8.41261e-05	0.00344647	0.986601	UP
ENSMUSG00000026029	-0.285391	7.9584	-5.3682	6.10663e-05	0.00274231	0.984393	NOT
ENSMUSG00000019823	0.546635	5.78772	5.22707	8.08888e-05	0.00337302	0.957754	NOT
ENSMUSG00000001228	1.25082	2.24483	4.87154	0.000165943	0.00564329	0.928324	UP
ENSMUSG00000060181	-0.370844	5.47705	-5.16781	9.10873e-05	0.00365653	0.909059	NOT
ENSMUSG00000061306	0.293396	9.02315	5.35662	6.24855e-05	0.00278903	0.880856	NOT
ENSMUSG00000031765	0.60812	5.51933	5.16359	9.18635e-05	0.00365653	0.874502	UP
ENSMUSG00000004837	-0.361517	7.1888	-5.27526	7.34647e-05	0.00315887	0.871314	NOT
ENSMUSG00000038608	-0.324739	8.75733	-5.33208	6.56066e-05	0.00286864	0.851375	NOT
ENSMUSG00000026202	0.900771	3.12555	4.90236	0.000155832	0.00541779	0.840527	UP
ENSMUSG00000061477	0.57101	5.08506	5.10213	0.000103953	0.00403457	0.829942	NOT
ENSMUSG00000000753	-0.573474	5.69172	-5.10982	0.000102354	0.00400582	0.758231	NOT
ENSMUSG00000073411	0.93706	10.4411	5.32963	6.59269e-05	0.00286864	0.750316	UP
ENSMUSG00000027342	0.407961	4.7364	5.02447	0.000121606	0.00454351	0.742459	NOT
ENSMUSG00000020262	0.738461	4.08844	4.95641	0.000139603	0.00502823	0.742404	UP
ENSMUSG00000002233	0.52711	3.9381	4.93787	0.000144965	0.00512765	0.738983	NOT
ENSMUSG00000034509	-0.465498	4.52137	-4.98294	0.000132284	0.00486466	0.726861	NOT
ENSMUSG00000024378	1.54884	0.793677	4.7024	0.000234711	0.00730785	0.723561	UP
ENSMUSG00000024084	1.0185	2.09383	4.74376	0.000215574	0.00690953	0.692894	UP
ENSMUSG00000060126	0.496427	5.46448	5.06253	0.000112597	0.00430106	0.67764	NOT
ENSMUSG00000030683	1.68648	-1.0296	4.68254	0.000244512	0.00752934	0.656184	UP
ENSMUSG00000030342	0.59772	10.3499	5.26788	7.45546e-05	0.00319445	0.62968	UP
ENSMUSG00000009214	-0.496816	4.90612	-4.97452	0.000134562	0.00492256	0.629161	NOT
ENSMUSG00000024978	-0.487833	5.9328	-5.0622	0.000112673	0.00430106	0.614976	NOT
ENSMUSG00000073616	0.440126	4.64866	4.95163	0.000140966	0.00506429	0.610789	NOT
ENSMUSG00000029103	0.370632	8.18922	5.19447	8.63455e-05	0.00350663	0.604225	NOT
ENSMUSG00000016494	0.346059	8.92012	5.21824	8.23307e-05	0.00342295	0.603462	NOT
ENSMUSG00000039899	0.843013	5.50987	5.0286	0.000120593	0.00451774	0.598224	UP
ENSMUSG00000026864	-0.329654	10.441	-5.25223	7.69215e-05	0.00327205	0.597336	NOT
ENSMUSG00000037742	0.716141	8.85938	5.20929	8.38191e-05	0.00344647	0.587527	UP
ENSMUSG00000030921	0.498932	5.87501	5.05016	0.000115449	0.00437177	0.579979	NOT
ENSMUSG00000090035	-0.31671	6.44542	-5.08609	0.000107368	0.00413279	0.577555	NOT
ENSMUSG00000060938	0.515176	4.98622	4.96907	0.000136061	0.00493874	0.576065	NOT
ENSMUSG00000105402	-1.37934	1.12742	-4.62626	0.000274615	0.00816699	0.574152	DOWN
ENSMUSG00000028673	0.33661	8.14206	5.16518	9.15693e-05	0.00365653	0.547927	NOT
ENSMUSG00000025967	0.547742	4.81996	4.93432	0.000146015	0.00514026	0.538195	NOT
ENSMUSG00000032988	2.27949	-0.818641	4.59435	0.000293343	0.00858044	0.508415	UP
ENSMUSG00000028234	0.714738	4.79689	4.91623	0.000151491	0.00531966	0.505188	UP
ENSMUSG00000036606	-0.276667	10.2888	-5.20296	8.4889e-05	0.0034575	0.50347	NOT
ENSMUSG00000048965	0.756914	4.4181	4.87325	0.000165363	0.00563724	0.497674	UP
ENSMUSG00000073409	1.63228	2.22383	4.64536	0.000263996	0.00793743	0.47859	UP
ENSMUSG00000026796	0.440967	4.84402	4.90586	0.000154725	0.00539268	0.475099	NOT
ENSMUSG00000058099	-0.282961	9.34326	-5.16392	9.18028e-05	0.00365653	0.471769	NOT
ENSMUSG00000073902	1.49663	3.06571	4.70777	0.000232132	0.00724365	0.460483	UP
ENSMUSG00000004891	1.31258	1.88155	4.61285	0.000282331	0.00834544	0.457485	UP
ENSMUSG00000051124	-0.65563	3.58045	-4.73748	0.000218372	0.00695367	0.442101	DOWN
ENSMUSG00000026536	2.17581	-0.186419	4.53861	0.000329241	0.00947227	0.424222	UP
ENSMUSG00000027195	0.358459	5.95633	4.96907	0.000136061	0.00493874	0.400154	NOT
ENSMUSG00000066456	0.782032	3.24335	4.69837	0.000236665	0.00731079	0.399708	UP
ENSMUSG00000051906	1.86808	0.00408813	4.52245	0.000340466	0.00971542	0.394414	UP
ENSMUSG00000030213	-0.356448	6.7867	-5.0085	0.000125604	0.00468041	0.370854	NOT
ENSMUSG00000039001	0.848298	3.67549	4.73022	0.000221656	0.00702629	0.370564	UP
ENSMUSG00000026657	-0.257613	8.90704	-5.09945	0.000104515	0.00404519	0.36367	NOT
ENSMUSG00000102602	-1.15918	1.18582	-4.51788	0.000343713	0.00978812	0.356262	DOWN
ENSMUSG00000023947	-0.379113	5.9712	-4.93677	0.000145291	0.00512765	0.345597	NOT
ENSMUSG00000028019	1.46098	0.8278	4.50619	0.000352153	0.0099276	0.340029	UP
ENSMUSG00000024334	0.555728	5.01232	4.85002	0.000173398	0.0058652	0.324359	NOT
ENSMUSG00000026866	2.00044	-0.136012	4.48522	0.000367835	0.0101652	0.32377	UP
ENSMUSG00000046841	-0.340104	6.27596	-4.95025	0.000141361	0.00506551	0.323001	NOT
ENSMUSG00000025232	0.506947	10.393	5.11709	0.000100867	0.00396981	0.317695	NOT
ENSMUSG00000053536	-0.297698	6.71349	-4.97873	0.000133417	0.00489348	0.317535	NOT
ENSMUSG00000023191	0.533866	5.10935	4.8524	0.000172558	0.00585403	0.310158	NOT
ENSMUSG00000031320	0.545067	5.80953	4.91137	0.000152998	0.00534577	0.30397	NOT
ENSMUSG00000090019	-0.440026	4.7833	-4.79294	0.00019488	0.00636473	0.277302	NOT
ENSMUSG00000025959	-0.512681	5.29927	-4.84148	0.000176452	0.00594294	0.275686	NOT
ENSMUSG00000001289	0.501757	5.12946	4.83571	0.000178547	0.00597045	0.27188	NOT
ENSMUSG00000026421	1.23154	1.15018	4.47953	0.000372211	0.0102256	0.266126	UP
ENSMUSG00000047675	0.532504	5.47043	4.8491	0.000173725	0.0058652	0.23492	NOT
ENSMUSG00000042476	-0.373559	6.15344	-4.89326	0.000158751	0.005492	0.225004	NOT
ENSMUSG00000026222	1.03653	4.99276	4.79844	0.000192697	0.00630811	0.222722	UP
ENSMUSG00000027078	0.665484	4.7176	4.76803	0.000205094	0.0066518	0.214828	UP
ENSMUSG00000029622	0.302339	9.31182	5.03405	0.000119271	0.00448461	0.201862	NOT
ENSMUSG00000023341	0.770312	2.78041	4.54727	0.000323382	0.00934207	0.182909	UP
ENSMUSG00000063882	0.495456	4.47389	4.72369	0.000224651	0.00705738	0.176487	NOT
ENSMUSG00000016252	0.4068	4.7687	4.74914	0.000213205	0.00685142	0.166365	NOT
ENSMUSG00000046718	0.829125	6.28777	4.87644	0.000164291	0.00561436	0.153186	UP
ENSMUSG00000008318	-0.605846	3.98307	-4.63647	0.000268885	0.00805879	0.141215	DOWN
ENSMUSG00000025875	1.07742	1.58077	4.43179	0.00041109	0.0110765	0.129842	UP
ENSMUSG00000020120	0.308194	9.22384	4.99311	0.000129584	0.00479049	0.12168	NOT
ENSMUSG00000029299	-0.920718	2.95348	-4.49842	0.000357885	0.0100487	0.0875813	DOWN
ENSMUSG00000090213	0.328242	5.89464	4.80916	0.000188514	0.00618848	0.0788653	NOT
ENSMUSG00000034792	-0.353544	9.17378	-4.96506	0.000137172	0.00496619	0.0703665	NOT
ENSMUSG00000047141	-0.498685	5.09963	-4.72389	0.000224562	0.00705738	0.069686	NOT
ENSMUSG00000057322	0.661434	3.62131	4.57445	0.000305678	0.0089226	0.0609924	UP
ENSMUSG00000024349	-0.276926	9.48383	-4.96162	0.000138134	0.00498813	0.0456684	NOT
ENSMUSG00000102882	1.73503	-0.390809	4.33857	0.000499363	0.0125299	0.0453617	UP
ENSMUSG00000105848	-0.988535	1.76817	-4.388	0.000450389	0.0117076	0.0446574	DOWN
ENSMUSG00000075611	1.05213	1.90235	4.40644	0.000433395	0.0114172	0.0387935	UP
ENSMUSG00000024164	2.32247	0.899179	4.33855	0.000499387	0.0125299	0.00753005	UP
ENSMUSG00000047250	-0.298568	10.612	-4.96943	0.000135962	0.00493874	0.00468636	NOT
ENSMUSG00000025466	1.23998	0.811094	4.31442	0.000525235	0.0129107	-0.0353467	UP
ENSMUSG00000031266	1.00657	3.18805	4.48032	0.000371605	0.0102256	-0.0379589	UP
ENSMUSG00000029826	0.484044	5.6037	4.72684	0.000223204	0.00704349	-0.0435083	NOT
ENSMUSG00000055435	-0.285234	7.32745	-4.84016	0.000176927	0.00594467	-0.0440402	NOT
ENSMUSG00000027399	-0.349462	6.80119	-4.80893	0.000188601	0.00618848	-0.0457826	NOT
ENSMUSG00000053436	-0.252316	8.29806	-4.87755	0.00016392	0.00561436	-0.0549341	NOT
ENSMUSG00000020682	-0.754038	3.19537	-4.44986	0.000395908	0.010792	-0.0662197	DOWN
ENSMUSG00000024621	-0.28062	13.8606	-5.00032	0.000127703	0.00474271	-0.0679089	NOT
ENSMUSG00000002103	-0.226666	8.60917	-4.87926	0.000163348	0.00560948	-0.0742672	NOT
ENSMUSG00000028691	0.42839	7.2366	4.82288	0.000183292	0.00608557	-0.0788433	NOT
ENSMUSG00000026238	0.396073	6.52969	4.77677	0.00020145	0.00654878	-0.0885577	NOT
ENSMUSG00000067942	-0.405541	4.66457	-4.60173	0.000288898	0.00850369	-0.0963444	NOT
ENSMUSG00000028134	-0.573361	3.9041	-4.51258	0.000347514	0.00984908	-0.100759	NOT
ENSMUSG00000021281	-0.571532	5.0921	-4.63593	0.000269182	0.00805879	-0.10911	NOT
ENSMUSG00000038552	1.07801	2.73396	4.39888	0.000440282	0.011552	-0.113325	UP
ENSMUSG00000058715	0.311079	9.53106	4.88766	0.000160574	0.00553907	-0.113922	NOT
ENSMUSG00000105244	-2.14901	-0.986809	-4.26568	0.000581667	0.0138998	-0.120464	DOWN
ENSMUSG00000049422	2.03622	-1.79013	4.27673	0.000568348	0.0137138	-0.122918	UP
ENSMUSG00000001270	-0.264868	10.0617	-4.89348	0.000158679	0.005492	-0.126005	NOT
ENSMUSG00000034994	0.412316	8.13453	4.83879	0.000177424	0.00594711	-0.12855	NOT
ENSMUSG00000023505	1.38028	0.97752	4.26512	0.000582342	0.0138998	-0.145118	UP
ENSMUSG00000097654	1.27416	1.82175	4.30943	0.000530738	0.0129792	-0.146842	UP
ENSMUSG00000018920	0.361271	6.45062	4.74271	0.000216038	0.00690953	-0.148224	NOT
ENSMUSG00000020522	-0.277573	7.95942	-4.8157	0.000186004	0.00613272	-0.155995	NOT
ENSMUSG00000074024	-0.313802	6.72239	-4.74169	0.000216493	0.00690953	-0.176888	NOT
ENSMUSG00000035711	-0.444451	6.67111	-4.73376	0.000220047	0.00699112	-0.182888	NOT
ENSMUSG00000027457	-0.699409	4.41454	-4.52571	0.00033817	0.00968203	-0.184858	DOWN
ENSMUSG00000040848	-0.280984	8.80818	-4.82967	0.000180764	0.00601587	-0.190358	NOT
ENSMUSG00000030695	0.423458	8.82244	4.83178	0.000179984	0.00600419	-0.191624	NOT
ENSMUSG00000000127	-0.409038	5.18158	-4.60808	0.000285129	0.00841042	-0.191704	NOT
ENSMUSG00000014547	-0.369025	7.05397	-4.74965	0.000212981	0.00685142	-0.201014	NOT
ENSMUSG00000075706	0.373028	6.2455	4.69985	0.000235945	0.00731079	-0.207251	NOT
ENSMUSG00000004270	-0.326407	7.96749	-4.79121	0.000195574	0.00637253	-0.207251	NOT
ENSMUSG00000020460	0.611748	5.04582	4.59697	0.000291752	0.00855176	-0.209869	UP
ENSMUSG00000074272	-0.287422	6.04686	-4.67506	0.000248306	0.00761274	-0.214925	NOT
ENSMUSG00000045932	1.50985	4.50196	4.52613	0.000337874	0.00968203	-0.228733	UP
ENSMUSG00000021224	-0.309528	8.99127	-4.81565	0.000186026	0.00613272	-0.230739	NOT
ENSMUSG00000037822	0.308835	6.80369	4.7163	0.000228093	0.00713351	-0.250788	NOT
ENSMUSG00000044080	0.720154	2.77068	4.33445	0.000503687	0.0125796	-0.252635	UP
ENSMUSG00000051615	0.262412	6.96273	4.72147	0.000225679	0.0070738	-0.258927	NOT
ENSMUSG00000061143	-0.426409	6.05699	-4.65057	0.000261169	0.00788476	-0.263783	NOT
ENSMUSG00000048895	-0.405333	4.96153	-4.5515	0.000320556	0.0092803	-0.265492	NOT
ENSMUSG00000036661	1.21474	2.04988	4.26689	0.000580193	0.0138998	-0.266061	UP
ENSMUSG00000074785	1.4044	1.00844	4.19458	0.000675234	0.0156375	-0.287822	UP
ENSMUSG00000004707	0.856975	6.18014	4.65479	0.000258908	0.00783491	-0.293003	UP
ENSMUSG00000078812	0.270953	7.96879	4.75062	0.000212558	0.00685142	-0.2984	NOT
ENSMUSG00000062328	0.552332	4.41272	4.48635	0.000366977	0.0101615	-0.305155	NOT
ENSMUSG00000060143	0.937565	2.10516	4.24881	0.000602603	0.0142379	-0.311062	UP
ENSMUSG00000024942	1.05235	2.11619	4.243	0.000609983	0.0143638	-0.325044	UP
ENSMUSG00000040204	1.27151	0.0965269	4.1482	0.00074437	0.0168216	-0.325072	UP
ENSMUSG00000005142	0.298991	10.9851	4.82083	0.000184065	0.00609677	-0.326352	NOT
ENSMUSG00000010142	-0.257926	7.18916	-4.69791	0.000236892	0.00731079	-0.326916	NOT
ENSMUSG00000059534	0.437089	4.71757	4.50014	0.00035661	0.0100331	-0.342777	NOT
ENSMUSG00000015575	0.358935	6.69278	4.65816	0.000257115	0.00779748	-0.358758	NOT
ENSMUSG00000032412	0.277517	8.17755	4.72741	0.000222942	0.00704349	-0.364183	NOT
ENSMUSG00000021200	-0.326002	6.90964	-4.66081	0.000255714	0.00777181	-0.370458	NOT
ENSMUSG00000036197	-0.421787	5.66851	-4.56739	0.000310176	0.00903509	-0.370551	NOT
ENSMUSG00000006333	0.423889	7.1167	4.67211	0.000249823	0.00764251	-0.381278	NOT
ENSMUSG00000021423	0.32951	9.85791	4.76576	0.000206053	0.00666746	-0.385504	NOT
ENSMUSG00000106951	1.03495	1.38872	4.16347	0.000720846	0.0163957	-0.387563	UP
ENSMUSG00000020163	0.377901	4.92727	4.49684	0.000359061	0.0100516	-0.393567	NOT
ENSMUSG00000108693	2.22419	-0.954829	4.1066	0.000812472	0.0178706	-0.396436	UP
ENSMUSG00000020638	1.26529	2.48253	4.23572	0.000619376	0.0144394	-0.401571	UP
ENSMUSG00000016528	0.344411	7.30993	4.66726	0.000252333	0.00768573	-0.411738	NOT
ENSMUSG00000001403	1.67721	0.413672	4.10029	0.000823346	0.0179407	-0.432765	UP
ENSMUSG00000032330	0.403385	5.00063	4.48301	0.00036953	0.0101919	-0.437964	NOT
ENSMUSG00000028163	-0.252367	7.66502	-4.66769	0.000252108	0.00768573	-0.439554	NOT
ENSMUSG00000044703	1.43218	0.945254	4.11289	0.000801778	0.0176909	-0.44495	UP
ENSMUSG00000026956	0.371558	6.86331	4.62536	0.000275128	0.00816699	-0.449424	NOT
ENSMUSG00000036181	0.629518	3.89721	4.35876	0.000478738	0.0122179	-0.452529	UP
ENSMUSG00000022295	0.270283	8.15493	4.67998	0.000245805	0.00755257	-0.461837	NOT
ENSMUSG00000028278	2.63581	0.952984	4.10178	0.000820755	0.0179313	-0.464379	UP
ENSMUSG00000022150	0.700638	5.21633	4.49123	0.000363271	0.010139	-0.46579	UP
ENSMUSG00000026628	0.690362	5.03339	4.47312	0.000377211	0.0103225	-0.467275	UP
ENSMUSG00000026594	-0.379341	5.57557	-4.51356	0.000346808	0.00984908	-0.467646	NOT
ENSMUSG00000029708	-0.510106	5.35133	-4.48927	0.000364755	0.0101602	-0.471376	NOT
ENSMUSG00000040964	-0.355607	6.11381	-4.55147	0.000320581	0.0092803	-0.483595	NOT
ENSMUSG00000019158	0.469222	4.9884	4.45327	0.000393114	0.0107367	-0.498849	NOT
ENSMUSG00000006731	0.40001	6.28772	4.561	0.000314313	0.0091366	-0.505468	NOT
ENSMUSG00000003518	0.360239	4.63803	4.41336	0.000427183	0.0113357	-0.506592	NOT
ENSMUSG00000025578	-0.619267	3.96894	-4.32349	0.000515363	0.0128028	-0.507219	DOWN
ENSMUSG00000070738	0.259907	7.97422	4.64962	0.000261681	0.00788476	-0.510648	NOT
ENSMUSG00000090185	-0.809221	2.17714	-4.14183	0.000754411	0.0169937	-0.513118	DOWN
ENSMUSG00000024429	0.425526	4.98217	4.44552	0.000399499	0.0108271	-0.513326	NOT
ENSMUSG00000028843	0.342508	7.46383	4.61651	0.000280204	0.00830008	-0.533978	NOT
ENSMUSG00000041920	-0.306235	8.0299	-4.62613	0.000274687	0.00816699	-0.559081	NOT
ENSMUSG00000029924	-0.459741	4.43596	-4.349	0.0004886	0.0124243	-0.572246	NOT
ENSMUSG00000063316	0.499136	4.62733	4.38068	0.000457321	0.0118002	-0.57438	NOT
ENSMUSG00000090665	-0.989082	1.51149	-4.06537	0.000886195	0.0188128	-0.574517	DOWN
ENSMUSG00000036469	-0.309302	7.64174	-4.59842	0.000290881	0.00854409	-0.582061	NOT
ENSMUSG00000031848	0.382252	4.99386	4.4063	0.000433515	0.0114172	-0.597565	NOT
ENSMUSG00000082088	0.950381	1.47011	4.06253	0.000891513	0.0188971	-0.600573	UP
ENSMUSG00000019944	-0.353215	6.32959	-4.51151	0.000348289	0.00984908	-0.602329	NOT
ENSMUSG00000029822	0.809926	3.72322	4.26416	0.000583525	0.0139044	-0.609392	UP
ENSMUSG00000105769	1.04248	0.496754	4.00958	0.000996869	0.020018	-0.614804	UP
ENSMUSG00000061232	0.669697	9.00017	4.6346	0.000269924	0.00806376	-0.616441	UP
ENSMUSG00000053581	0.415287	5.37212	4.42541	0.00041659	0.0111817	-0.632479	NOT
ENSMUSG00000042700	-0.306999	6.1916	-4.48654	0.000366831	0.0101615	-0.633886	NOT
ENSMUSG00000024732	0.317879	5.6552	4.44551	0.000399514	0.0108271	-0.641301	NOT
ENSMUSG00000033355	1.35259	5.02625	4.3846	0.000453591	0.011769	-0.644582	UP
ENSMUSG00000019843	0.504872	4.72621	4.3574	0.000480094	0.0122302	-0.644915	NOT
ENSMUSG00000063457	0.393711	5.38772	4.41794	0.000423129	0.0112708	-0.650899	NOT
ENSMUSG00000054675	-0.358507	12.8008	-4.70002	0.000235862	0.00731079	-0.656266	NOT
ENSMUSG00000047867	-0.476502	5.43007	-4.40787	0.000432101	0.0114172	-0.658103	NOT
ENSMUSG00000049551	1.71489	0.0933196	3.97202	0.00107914	0.0210583	-0.667135	UP
ENSMUSG00000046432	0.668745	2.77098	4.13245	0.000769439	0.0172214	-0.670077	UP
ENSMUSG00000074682	-0.831	3.21855	-4.15367	0.000735854	0.016656	-0.680198	DOWN
ENSMUSG00000024186	1.14321	2.14092	4.07085	0.000876028	0.0186819	-0.681427	UP
ENSMUSG00000072825	1.4207	0.0323784	3.96252	0.00110101	0.0213365	-0.682662	UP
ENSMUSG00000068267	0.464805	3.92912	4.25106	0.000599766	0.0142145	-0.684571	NOT
ENSMUSG00000074802	1.88664	1.94385	4.04795	0.000919356	0.0192403	-0.693655	UP
ENSMUSG00000026355	0.570979	5.28071	4.38314	0.000454972	0.011783	-0.705252	NOT
ENSMUSG00000032218	1.77429	1.08321	3.97917	0.00106297	0.020859	-0.724242	UP
ENSMUSG00000024268	-0.760719	2.3353	-4.04968	0.000915998	0.0192403	-0.728742	DOWN
ENSMUSG00000039115	-0.412107	7.05444	-4.49636	0.000359421	0.0100516	-0.732005	NOT
ENSMUSG00000060636	0.475102	4.08093	4.244	0.000608708	0.0143579	-0.735741	NOT
ENSMUSG00000034621	-0.285048	6.14432	-4.43427	0.000408976	0.0110408	-0.737036	NOT
ENSMUSG00000034714	0.885427	2.89078	4.10782	0.000810379	0.0178526	-0.746926	UP
ENSMUSG00000026457	0.233606	8.18067	4.54117	0.0003275	0.00944157	-0.755732	NOT
ENSMUSG00000046364	0.571626	4.14045	4.24083	0.000612774	0.0143751	-0.757197	NOT
ENSMUSG00000039967	-0.434699	6.50288	-4.44854	0.000396996	0.0108006	-0.758545	NOT
ENSMUSG00000025402	0.501043	4.37993	4.26591	0.000581385	0.0138998	-0.760065	NOT
ENSMUSG00000036781	0.38997	4.81294	4.30938	0.000530803	0.0129792	-0.763655	NOT
ENSMUSG00000031875	0.224922	7.63257	4.51099	0.000348665	0.00984908	-0.771673	NOT
ENSMUSG00000028842	-0.492425	4.68678	-4.27942	0.000565156	0.013676	-0.773667	NOT
ENSMUSG00000012405	0.452944	4.90435	4.30513	0.000535543	0.0130496	-0.792636	NOT
ENSMUSG00000073591	0.706655	2.93486	4.08901	0.000843139	0.0182468	-0.794607	UP
ENSMUSG00000022906	0.341854	6.20004	4.4151	0.000425642	0.0113163	-0.798516	NOT
ENSMUSG00000021840	-0.366626	5.0568	-4.30574	0.000534859	0.0130496	-0.803234	NOT
ENSMUSG00000064370	0.378925	8.40207	4.52509	0.000338605	0.00968203	-0.807337	NOT
ENSMUSG00000027514	1.71206	2.17452	4.00644	0.00100348	0.0200854	-0.815494	UP
ENSMUSG00000050410	0.767	2.57472	4.03183	0.000951136	0.0195688	-0.839568	UP
ENSMUSG00000055069	-0.42393	5.68701	-4.34396	0.000493772	0.0125299	-0.844227	NOT
ENSMUSG00000013846	1.26676	0.441422	3.88804	0.00128877	0.0238532	-0.850838	UP
ENSMUSG00000029513	-0.347713	7.71335	-4.47313	0.000377201	0.0103225	-0.85246	NOT
ENSMUSG00000037405	-0.242338	8.02822	-4.48673	0.000366683	0.0101615	-0.853552	NOT
ENSMUSG00000061904	0.264854	7.02437	4.43857	0.000405323	0.0109633	-0.861241	NOT
ENSMUSG00000010660	-0.341494	5.472	-4.31706	0.000522338	0.0128988	-0.863275	NOT
ENSMUSG00000079641	0.792749	2.85657	4.04758	0.000920065	0.0192403	-0.8644	UP
ENSMUSG00000030872	0.445234	5.42571	4.31654	0.000522911	0.0128988	-0.872362	NOT
ENSMUSG00000060538	0.331629	5.44322	4.31679	0.000522633	0.0128988	-0.873789	NOT
ENSMUSG00000005413	0.461207	5.16602	4.29091	0.000551722	0.0134129	-0.876466	NOT
ENSMUSG00000032741	-0.485533	5.69842	-4.32765	0.000510899	0.0127333	-0.878696	NOT
ENSMUSG00000021003	0.508824	5.43983	4.31481	0.0005248	0.0129107	-0.879236	NOT
ENSMUSG00000038963	-0.434537	6.97284	-4.41988	0.000421416	0.0112681	-0.883175	NOT
ENSMUSG00000022890	0.328164	5.8306	4.34314	0.000494618	0.0125299	-0.888375	NOT
ENSMUSG00000042529	-0.881642	3.52313	-4.0788	0.000861472	0.018484	-0.901277	DOWN
ENSMUSG00000030263	0.363503	7.02077	4.41811	0.000422975	0.0112708	-0.904931	NOT
ENSMUSG00000026879	1.12861	3.70715	4.11842	0.000792501	0.0176426	-0.908236	UP
ENSMUSG00000020491	-0.59622	3.83056	-4.11575	0.000796976	0.0176426	-0.910388	DOWN
ENSMUSG00000061751	-1.68757	0.461501	-3.83991	0.00142695	0.0255665	-0.924598	DOWN
ENSMUSG00000016206	0.55552	6.50596	4.37589	0.000461913	0.0118571	-0.929061	NOT
ENSMUSG00000043510	0.54192	3.14769	4.0417	0.00093154	0.0193234	-0.938589	NOT
ENSMUSG00000036894	1.03134	1.21463	3.87929	0.00131284	0.0239509	-0.939364	UP
ENSMUSG00000039994	0.861196	2.52934	3.97523	0.00107184	0.0209451	-0.948148	UP
ENSMUSG00000045328	1.08386	0.858855	3.85419	0.00138445	0.0249969	-0.951914	UP
ENSMUSG00000038507	0.353753	6.68969	4.37573	0.000462065	0.0118571	-0.953359	NOT
ENSMUSG00000097415	0.376232	5.25312	4.25912	0.000589711	0.0140041	-0.959823	NOT
ENSMUSG00000053553	0.622738	4.36854	4.1692	0.000712216	0.0162522	-0.961508	UP
ENSMUSG00000006024	0.257498	7.8801	4.42762	0.000414676	0.0111517	-0.970567	NOT
ENSMUSG00000107608	-1.36909	-0.329552	-3.80045	0.00155129	0.0270675	-0.973646	DOWN
ENSMUSG00000034807	0.253954	7.80158	4.42103	0.000420412	0.0112627	-0.977455	NOT
ENSMUSG00000105568	-1.65274	-1.33126	-3.79895	0.00155623	0.0271199	-0.978109	DOWN
ENSMUSG00000056153	0.411842	6.38508	4.34175	0.000496055	0.0125299	-0.982672	NOT
ENSMUSG00000060036	0.457742	7.26904	4.39355	0.000445202	0.0116343	-0.984982	NOT
ENSMUSG00000027695	-0.293883	7.45766	-4.39457	0.000444258	0.0116343	-0.99422	NOT
ENSMUSG00000062031	0.561961	3.24501	4.02383	0.000967338	0.0197662	-0.998403	NOT
ENSMUSG00000004849	0.302474	5.60473	4.26691	0.000580171	0.0138998	-1.00881	NOT
ENSMUSG00000025092	0.63401	3.48221	4.04543	0.000924241	0.0192702	-1.00939	UP
ENSMUSG00000028645	0.341792	6.58878	4.33982	0.000498057	0.0125299	-1.01549	NOT
ENSMUSG00000026675	0.874848	2.41104	3.9296	0.00118034	0.0223786	-1.01947	UP
ENSMUSG00000004934	-0.313311	5.47449	-4.23717	0.000617494	0.0144195	-1.03329	NOT
ENSMUSG00000020641	1.62584	1.95093	3.88232	0.00130446	0.0239509	-1.03494	UP
ENSMUSG00000052920	1.15124	0.748101	3.80398	0.00153975	0.0269331	-1.04157	UP
ENSMUSG00000020773	-0.274432	6.82418	-4.33447	0.000503666	0.0125796	-1.04845	NOT
ENSMUSG00000030107	1.30981	4.03961	4.08646	0.000847682	0.0182721	-1.05036	UP
ENSMUSG00000056201	0.253419	8.54215	4.41171	0.000428654	0.0113533	-1.05614	NOT
ENSMUSG00000037499	0.474987	4.46553	4.1171	0.000794703	0.0176426	-1.09258	NOT
ENSMUSG00000031129	-0.230428	8.13013	-4.37299	0.000464718	0.0119034	-1.10266	NOT
ENSMUSG00000025362	0.662381	4.34795	4.09897	0.00082563	0.0179626	-1.10482	UP
ENSMUSG00000030432	0.433103	4.58372	4.12291	0.000785056	0.0175429	-1.10682	NOT
ENSMUSG00000029470	0.284553	7.43472	4.33815	0.000499807	0.0125299	-1.11816	NOT
ENSMUSG00000062647	0.460956	5.32031	4.19008	0.000681648	0.01576	-1.11963	NOT
ENSMUSG00000017830	0.641535	5.04049	4.16249	0.000722337	0.016403	-1.12331	UP
ENSMUSG00000031682	-1.62096	-1.7358	-3.72446	0.0018223	0.0301444	-1.12432	DOWN
ENSMUSG00000078193	0.886726	0.849337	3.76621	0.00166801	0.0281358	-1.12546	UP
ENSMUSG00000035954	-0.321134	8.297	-4.36774	0.00046984	0.0120127	-1.12608	NOT
ENSMUSG00000025498	1.39316	4.2255	4.06901	0.000879424	0.0187258	-1.12836	UP
ENSMUSG00000037370	0.538448	3.98473	4.04598	0.000923174	0.0192702	-1.12932	NOT
ENSMUSG00000053580	-0.286983	9.14026	-4.39279	0.000445909	0.0116343	-1.1298	NOT
ENSMUSG00000058799	0.490485	4.51018	4.10333	0.00081808	0.0179293	-1.13201	NOT
ENSMUSG00000040675	0.625514	3.75719	4.01675	0.000981887	0.0198935	-1.13556	UP
ENSMUSG00000039982	-0.217044	8.81844	-4.38095	0.000457059	0.0118002	-1.13598	NOT
ENSMUSG00000049526	1.37883	-0.734661	3.71321	0.00186629	0.030619	-1.13652	UP
ENSMUSG00000015243	-0.326055	8.72509	-4.37575	0.000462051	0.0118571	-1.13984	NOT
ENSMUSG00000041797	-0.294678	9.6367	-4.40005	0.000439206	0.0115454	-1.14151	NOT
ENSMUSG00000060402	-0.370258	5.91733	-4.22085	0.000638998	0.0148721	-1.14717	NOT
ENSMUSG00000024248	0.392089	4.71213	4.11569	0.00079707	0.0176426	-1.15032	NOT
ENSMUSG00000043091	0.844279	2.94005	3.91855	0.00120824	0.0227231	-1.15072	UP
ENSMUSG00000054051	0.514536	3.87742	4.02272	0.000969597	0.0197744	-1.15167	NOT
ENSMUSG00000040268	0.362547	6.69961	4.28224	0.000561834	0.0136191	-1.15255	NOT
ENSMUSG00000084289	0.725697	1.36869	3.77741	0.00162888	0.0277982	-1.16235	UP
ENSMUSG00000038550	0.837629	1.97585	3.81793	0.00149492	0.0262988	-1.17106	UP
ENSMUSG00000022205	0.271051	6.5995	4.26643	0.000580756	0.0138998	-1.17165	NOT
ENSMUSG00000031101	-0.254431	8.08249	-4.33805	0.000499909	0.0125299	-1.17238	NOT
ENSMUSG00000019818	-0.223096	9.82989	-4.38895	0.000449493	0.011706	-1.17543	NOT
ENSMUSG00000018428	0.594071	4.73042	4.10127	0.000821634	0.0179313	-1.18647	UP
ENSMUSG00000028678	0.954927	1.72251	3.78881	0.00159003	0.0274696	-1.19064	UP
ENSMUSG00000032841	0.579623	3.83038	3.99899	0.00101939	0.0203006	-1.19067	NOT
ENSMUSG00000097974	-0.358621	4.57758	-4.07229	0.000873371	0.0186537	-1.19119	NOT
ENSMUSG00000049658	-0.459154	4.30116	-4.03251	0.000949781	0.0195688	-1.20589	NOT
ENSMUSG00000069495	-0.603589	3.02754	-3.88595	0.00129448	0.0238644	-1.20636	DOWN
ENSMUSG00000045658	-0.259781	6.83795	-4.26015	0.000588449	0.0139979	-1.20792	NOT
ENSMUSG00000002228	1.33333	0.708675	3.71326	0.00186607	0.030619	-1.21837	UP
ENSMUSG00000103037	1.57006	-0.20506	3.6762	0.0020186	0.0322407	-1.2262	UP
ENSMUSG00000021458	0.457553	4.48596	4.05524	0.000905333	0.0191226	-1.2276	NOT
ENSMUSG00000046230	-0.614358	2.87795	-3.85447	0.00138365	0.0249969	-1.24003	DOWN
ENSMUSG00000057219	-0.407423	5.88048	-4.17127	0.000709128	0.0162082	-1.24455	NOT
ENSMUSG00000044092	0.457101	3.69524	3.95583	0.00111669	0.0214918	-1.24703	NOT
ENSMUSG00000117337	-1.23106	-0.867092	-3.64932	0.00213698	0.0333421	-1.25052	DOWN
ENSMUSG00000026842	-0.317373	7.86742	-4.29035	0.000552367	0.0134129	-1.25396	NOT
ENSMUSG00000019851	1.04582	2.35082	3.8096	0.00152152	0.0266475	-1.25587	UP
ENSMUSG00000061787	0.539247	4.96067	4.08858	0.000843905	0.0182468	-1.26229	NOT
ENSMUSG00000062070	0.526169	4.75399	4.06569	0.000885608	0.0188128	-1.26622	NOT
ENSMUSG00000028716	1.38387	-0.466086	3.64498	0.00215676	0.033576	-1.27459	UP
ENSMUSG00000055839	0.319515	5.39153	4.12023	0.000789496	0.0176141	-1.27948	NOT
ENSMUSG00000004730	-0.238372	9.27593	-4.32172	0.000517267	0.0128273	-1.28842	NOT
ENSMUSG00000028599	-0.367092	9.50297	-4.32694	0.000511659	0.0127333	-1.28883	NOT
ENSMUSG00000027580	1.5247	1.10868	3.69832	0.00192614	0.0313398	-1.29067	UP
ENSMUSG00000024338	0.267619	6.55766	4.20683	0.000658091	0.0152658	-1.29211	NOT
ENSMUSG00000019861	-0.366295	5.74246	-4.13626	0.000763306	0.0171115	-1.29537	NOT
ENSMUSG00000073434	0.644114	3.08037	3.85891	0.00137069	0.0248444	-1.3052	UP
ENSMUSG00000030768	-0.413646	5.03167	-4.05476	0.000906245	0.0191226	-1.32576	NOT
ENSMUSG00000071866	0.30605	8.34164	4.27646	0.000568676	0.0137138	-1.32855	NOT
ENSMUSG00000024213	0.335029	5.98487	4.14674	0.000746659	0.0168461	-1.3307	NOT
ENSMUSG00000021684	0.534214	4.63079	4.02108	0.000972965	0.0198076	-1.33316	NOT
ENSMUSG00000073702	0.551702	3.77768	3.92316	0.0011965	0.0226238	-1.3365	NOT
ENSMUSG00000021360	0.6955	5.63921	4.1143	0.000799412	0.0176665	-1.34125	UP
ENSMUSG00000003032	1.4356	0.811895	3.65083	0.00213015	0.0333421	-1.35267	UP
ENSMUSG00000038543	0.357245	4.48343	3.99149	0.00103566	0.0204088	-1.36026	NOT
ENSMUSG00000032609	-0.418181	7.34233	-4.21397	0.000648298	0.0150635	-1.36234	NOT
ENSMUSG00000042446	-0.407044	5.16128	-4.04344	0.000928131	0.0192938	-1.37689	NOT
ENSMUSG00000090862	0.527178	4.81296	4.01531	0.000984881	0.0198935	-1.38551	NOT
ENSMUSG00000056019	-0.409659	4.28276	-3.94363	0.00114585	0.0219054	-1.39041	NOT
ENSMUSG00000111160	-0.982719	2.01026	-3.6952	0.00193891	0.0314786	-1.39321	DOWN
ENSMUSG00000056724	-0.381435	6.90671	-4.17343	0.00070591	0.0161754	-1.39805	NOT
ENSMUSG00000092274	0.607898	5.62001	4.08132	0.000856903	0.0184425	-1.40715	UP
ENSMUSG00000030062	-0.177041	8.75752	-4.2504	0.000600599	0.0142145	-1.4092	NOT
ENSMUSG00000015149	0.255585	7.00104	4.17569	0.00070257	0.0161599	-1.41507	NOT
ENSMUSG00000052821	-0.263107	6.89078	-4.16513	0.000718334	0.0163652	-1.41623	NOT
ENSMUSG00000028998	0.415262	3.72634	3.87663	0.00132024	0.0240545	-1.4201	NOT
ENSMUSG00000043157	0.418624	5.8383	4.09228	0.000837354	0.0181894	-1.42151	NOT
ENSMUSG00000079445	0.700036	2.87461	3.77879	0.00162415	0.0277954	-1.42606	UP
ENSMUSG00000117869	1.1464	-0.0278425	3.57183	0.00251857	0.0374604	-1.43748	UP
ENSMUSG00000039103	1.07286	0.370389	3.58654	0.00244127	0.0366217	-1.43774	UP
ENSMUSG00000028657	0.242265	8.90114	4.23995	0.000613899	0.0143751	-1.44336	NOT
ENSMUSG00000000958	-0.255829	7.345	-4.17502	0.000703556	0.0161599	-1.44817	NOT
ENSMUSG00000079164	-0.497082	4.72125	-3.96289	0.00110016	0.0213365	-1.44827	NOT
ENSMUSG00000027378	1.1049	2.21294	3.70197	0.0019113	0.0311386	-1.45146	UP
ENSMUSG00000033949	-0.269159	6.41289	-4.11594	0.00079665	0.0176426	-1.45357	NOT
ENSMUSG00000030577	0.421934	5.05732	4.00664	0.00100306	0.0200854	-1.45468	NOT
ENSMUSG00000017707	-0.259286	12.3919	-4.3113	0.000528671	0.0129724	-1.46166	NOT
ENSMUSG00000021366	-0.737432	3.27647	-3.78472	0.00160387	0.0276406	-1.46758	DOWN
ENSMUSG00000041313	0.575131	2.95727	3.7672	0.00166451	0.0281321	-1.46762	NOT
ENSMUSG00000044894	0.344753	5.43289	4.03232	0.000950157	0.0195688	-1.47362	NOT
ENSMUSG00000024442	-0.444475	4.44747	-3.92064	0.00120291	0.0226837	-1.47662	NOT
ENSMUSG00000052698	0.289487	7.90892	4.18649	0.000686809	0.0158532	-1.4843	NOT
ENSMUSG00000041992	-0.250516	7.93235	-4.18326	0.000691481	0.0159348	-1.48782	NOT
ENSMUSG00000048921	-0.605194	3.19868	-3.76526	0.00167139	0.0281464	-1.49678	DOWN
ENSMUSG00000006344	-0.351598	5.55629	-4.02	0.000975183	0.0198076	-1.50708	NOT
ENSMUSG00000034006	0.493088	3.66841	3.82859	0.00146155	0.0259871	-1.50794	NOT
ENSMUSG00000118501	-1.36936	-0.69969	-3.50298	0.00291439	0.0412043	-1.52707	DOWN
ENSMUSG00000032902	0.393771	5.17758	3.98226	0.00105604	0.0207521	-1.53049	NOT
ENSMUSG00000026288	-0.209074	10.5975	-4.23985	0.000614031	0.0143751	-1.53071	NOT
ENSMUSG00000039013	0.375753	5.99617	4.05219	0.000911162	0.0191974	-1.53351	NOT
ENSMUSG00000020267	0.314386	5.30226	3.99199	0.00103457	0.0204088	-1.53358	NOT
ENSMUSG00000079523	0.55302	2.57705	3.69317	0.00194728	0.031551	-1.53838	NOT
ENSMUSG00000051705	-0.435779	4.06717	-3.84719	0.00140514	0.0253051	-1.53979	NOT
ENSMUSG00000070427	0.808111	2.14019	3.65029	0.00213261	0.0333421	-1.54306	UP
ENSMUSG00000022353	-0.482847	4.92428	-3.93914	0.00115677	0.0219639	-1.54341	NOT
ENSMUSG00000062006	0.360993	4.86955	3.94357	0.001146	0.0219054	-1.5478	NOT
ENSMUSG00000062488	1.35683	2.13534	3.64661	0.00214929	0.0334969	-1.5503	UP
ENSMUSG00000052062	-0.420697	4.59281	-3.90101	0.0012539	0.0233623	-1.55381	NOT
ENSMUSG00000023262	-0.432152	4.84571	-3.927	0.00118685	0.0224715	-1.55563	NOT
ENSMUSG00000039774	-0.285792	6.53326	-4.07495	0.000868478	0.0186059	-1.55813	NOT
ENSMUSG00000074825	-0.320102	5.32169	-3.97052	0.00108257	0.0210958	-1.56716	NOT
ENSMUSG00000028644	-0.519572	3.78859	-3.79816	0.00155884	0.0271315	-1.57169	NOT
ENSMUSG00000058558	0.314641	5.16918	3.96007	0.00110672	0.0213584	-1.57456	NOT
ENSMUSG00000020484	-0.231976	8.86544	-4.17301	0.00070654	0.0161754	-1.57992	NOT
ENSMUSG00000028159	-0.263667	7.99804	-4.13716	0.000761857	0.0171064	-1.59128	NOT
ENSMUSG00000046111	-0.482679	4.21784	-3.83917	0.00142918	0.0255737	-1.59201	NOT
ENSMUSG00000058290	-0.324105	5.66283	-3.98734	0.00104479	0.0205597	-1.59735	NOT
ENSMUSG00000021957	0.318947	7.30624	4.10521	0.000814855	0.0178949	-1.59926	NOT
ENSMUSG00000021190	-0.362934	12.14	-4.23943	0.000614566	0.0143751	-1.60314	NOT
ENSMUSG00000068205	-1.72565	-1.85436	-3.45852	0.00320238	0.0435098	-1.60346	DOWN
ENSMUSG00000052656	-0.235881	7.10047	-4.08763	0.000845582	0.0182549	-1.60669	NOT
ENSMUSG00000038831	-0.350928	5.9271	-4.00401	0.00100865	0.0201601	-1.60906	NOT
ENSMUSG00000021290	0.491563	3.86706	3.80339	0.00154167	0.0269331	-1.60959	NOT
ENSMUSG00000004032	0.446946	3.34884	3.74222	0.001755	0.0292381	-1.60963	NOT
ENSMUSG00000093677	-1.17759	-0.615838	-3.45916	0.00319802	0.0435098	-1.61281	DOWN
ENSMUSG00000096727	0.262108	6.2261	4.02361	0.000967785	0.0197662	-1.63067	NOT
ENSMUSG00000074212	0.500289	5.5189	3.96287	0.00110019	0.0213365	-1.63874	NOT
ENSMUSG00000022811	-0.244786	6.62207	-4.0411	0.00093272	0.0193234	-1.64364	NOT
ENSMUSG00000024168	-0.446662	6.02696	-3.99386	0.00103049	0.0203966	-1.64473	NOT
ENSMUSG00000028832	0.546423	3.73551	3.76788	0.00166211	0.0281254	-1.65202	NOT
ENSMUSG00000000562	-0.242506	6.13044	-3.99806	0.00102139	0.0203006	-1.65934	NOT
ENSMUSG00000027217	-0.373966	6.46458	-4.01986	0.000975464	0.0198076	-1.66266	NOT
ENSMUSG00000079197	0.247462	6.87745	4.04988	0.000915622	0.0192403	-1.6671	NOT
ENSMUSG00000108621	-0.348253	6.44489	-4.01507	0.000985373	0.0198935	-1.67054	NOT
ENSMUSG00000026223	0.204561	10.0004	4.15981	0.00072642	0.016469	-1.67259	NOT
ENSMUSG00000017561	-0.21482	7.43273	-4.07357	0.000871013	0.0186317	-1.67344	NOT
ENSMUSG00000027459	-0.315877	6.76203	-4.03517	0.000944471	0.0195177	-1.67389	NOT
ENSMUSG00000109812	-0.441585	4.14978	-3.7914	0.00158134	0.0273533	-1.67714	NOT
ENSMUSG00000024056	1.25365	0.612387	3.47602	0.00308579	0.0426537	-1.67825	UP
ENSMUSG00000100599	-0.772074	1.31486	-3.50609	0.00289525	0.0410165	-1.67937	DOWN
ENSMUSG00000112459	-1.12334	-1.11646	-3.41651	0.00350043	0.0459294	-1.67991	DOWN
ENSMUSG00000017412	1.43258	-0.0237861	3.44658	0.0032844	0.0442904	-1.68109	UP
ENSMUSG00000006576	1.82365	0.637092	3.47467	0.00309465	0.0426537	-1.68389	UP
ENSMUSG00000026123	0.302758	6.99037	4.04385	0.000927328	0.0192938	-1.69419	NOT
ENSMUSG00000028048	0.225704	7.99868	4.09097	0.000839667	0.0182114	-1.69444	NOT
ENSMUSG00000108152	-1.4377	-0.27368	-3.4209	0.00346804	0.0456586	-1.69746	DOWN
ENSMUSG00000022283	0.40312	6.49221	4.00939	0.000997257	0.020018	-1.70279	NOT
ENSMUSG00000023951	1.51218	0.800235	3.47175	0.00311383	0.0427736	-1.70713	UP
ENSMUSG00000052459	0.380914	6.5675	4.01136	0.00099313	0.020018	-1.70921	NOT
ENSMUSG00000020932	1.59524	-0.51009	3.4163	0.00350198	0.0459294	-1.70939	UP
ENSMUSG00000117315	-0.62956	3.00093	-3.63908	0.0021839	0.0338107	-1.71042	DOWN
ENSMUSG00000003812	0.378249	7.45708	4.05956	0.000897115	0.0189871	-1.71214	NOT
ENSMUSG00000031983	0.457333	4.01124	3.77069	0.00165225	0.0280602	-1.71388	NOT
ENSMUSG00000054720	1.37213	1.21064	3.48988	0.00299644	0.0420381	-1.72157	UP
ENSMUSG00000056498	0.728911	3.74369	3.73296	0.00178977	0.0296763	-1.72804	UP
ENSMUSG00000005958	-0.61174	4.0297	-3.74705	0.00173711	0.028985	-1.7341	DOWN
ENSMUSG00000038379	1.56938	-0.513377	3.40318	0.00360065	0.046929	-1.73421	UP
ENSMUSG00000026987	-0.305403	5.94741	-3.94708	0.00113753	0.0218327	-1.73427	NOT
ENSMUSG00000026827	0.748961	2.8394	3.62204	0.00226423	0.0347852	-1.74348	UP
ENSMUSG00000027951	0.441103	6.53128	3.99279	0.00103282	0.0204088	-1.74397	NOT
ENSMUSG00000025213	1.70105	-1.64571	3.3755	0.00381792	0.049076	-1.75123	UP
ENSMUSG00000028917	0.570547	5.15323	3.87556	0.00132325	0.0240779	-1.75278	NOT
ENSMUSG00000027469	1.28656	1.10304	3.46147	0.00318239	0.0433739	-1.76404	UP
ENSMUSG00000020420	-0.534672	3.21292	-3.63776	0.00219	0.0338676	-1.7672	NOT
ENSMUSG00000048142	0.546484	3.10063	3.63696	0.00219373	0.033888	-1.7709	NOT
ENSMUSG00000072620	1.00332	6.04098	3.94431	0.00114421	0.0219054	-1.771	UP
ENSMUSG00000030539	-0.643697	4.11798	-3.73753	0.00177251	0.0294948	-1.77131	DOWN
ENSMUSG00000053347	-0.344091	5.01036	-3.83706	0.00143558	0.0256422	-1.78382	NOT
ENSMUSG00000038943	0.973387	1.46023	3.47581	0.00308712	0.0426537	-1.78486	UP
ENSMUSG00000040663	-0.365008	5.53583	-3.88601	0.00129432	0.0238644	-1.78683	NOT
ENSMUSG00000024663	-0.306588	9.96714	-4.10281	0.00081898	0.0179293	-1.78946	NOT
ENSMUSG00000036452	0.938653	2.21267	3.53555	0.00271998	0.0392883	-1.79235	UP
ENSMUSG00000034708	0.290692	11.6984	4.13933	0.000758382	0.0170557	-1.79946	NOT
ENSMUSG00000074896	1.15454	4.43181	3.77494	0.00163745	0.027886	-1.80237	UP
ENSMUSG00000057982	-0.291941	4.92424	-3.81399	0.00150745	0.0264453	-1.81636	NOT
ENSMUSG00000018770	0.31091	5.67413	3.88923	0.00128553	0.0238363	-1.82119	NOT
ENSMUSG00000035064	-0.258175	8.04437	-4.03026	0.0009543	0.0196051	-1.82248	NOT
ENSMUSG00000032612	-0.198496	7.42501	-4.00162	0.00101376	0.0202333	-1.82575	NOT
ENSMUSG00000001175	0.255158	8.09169	4.02751	0.000959852	0.0196903	-1.83729	NOT
ENSMUSG00000031714	-0.312536	6.8241	-3.96112	0.00110428	0.0213426	-1.83936	NOT
ENSMUSG00000040811	1.2594	1.65888	3.46312	0.00317133	0.0432653	-1.84216	UP
ENSMUSG00000037411	0.838354	1.00829	3.41255	0.00352986	0.0460922	-1.84776	UP
ENSMUSG00000037805	0.357501	6.19515	3.91856	0.00120821	0.0227231	-1.84956	NOT
ENSMUSG00000071637	-0.286692	6.90753	-3.96108	0.00110437	0.0213426	-1.85089	NOT
ENSMUSG00000027952	0.43081	3.56271	3.65135	0.0021278	0.0333421	-1.85141	NOT
ENSMUSG00000033917	0.358773	6.251	3.9208	0.00120251	0.0226837	-1.8538	NOT
ENSMUSG00000027540	-0.186315	8.2925	-4.02527	0.000964394	0.0197546	-1.85417	NOT
ENSMUSG00000050973	-0.571647	4.28709	-3.71881	0.00184427	0.0303643	-1.85507	NOT
ENSMUSG00000019055	-0.221799	9.06893	-4.04843	0.000918428	0.0192403	-1.85719	NOT
ENSMUSG00000023175	0.229333	8.77561	4.04061	0.000933689	0.0193234	-1.85907	NOT
ENSMUSG00000006445	-0.490577	5.00635	-3.79553	0.00156756	0.0272157	-1.86458	NOT
ENSMUSG00000032966	0.221995	6.67929	3.94031	0.00115392	0.0219639	-1.87378	NOT
ENSMUSG00000045064	-1.62481	-1.9917	-3.30592	0.00442336	0.0543592	-1.8761	DOWN
ENSMUSG00000073805	-1.16627	0.257458	-3.34685	0.0040566	0.051297	-1.87638	DOWN
ENSMUSG00000025010	-1.06517	1.6712	-3.4268	0.00342494	0.0452786	-1.88218	DOWN
ENSMUSG00000020423	-0.253255	7.94419	-3.99378	0.00103068	0.0203966	-1.89138	NOT
ENSMUSG00000035829	-0.661662	3.59731	-3.61925	0.00227768	0.0349535	-1.89206	DOWN
ENSMUSG00000041774	0.64576	1.56728	3.42672	0.00342554	0.0452786	-1.89856	UP
ENSMUSG00000039254	-0.309198	5.4247	-3.82322	0.00147828	0.0261187	-1.89979	NOT
ENSMUSG00000015027	0.377595	4.99218	3.78755	0.00159428	0.0275091	-1.90362	NOT
ENSMUSG00000049878	-0.331966	6.12772	-3.88114	0.00130772	0.0239509	-1.90438	NOT
ENSMUSG00000032554	0.198595	11.4246	4.08027	0.000858809	0.0184552	-1.91215	NOT
ENSMUSG00000006273	0.260237	7.75117	3.97832	0.00106487	0.0208671	-1.91219	NOT
ENSMUSG00000052837	-0.337354	8.28002	-3.99643	0.00102492	0.0203402	-1.91275	NOT
ENSMUSG00000005968	0.671839	2.22725	3.47453	0.00309554	0.0426537	-1.918	UP
ENSMUSG00000038578	0.786336	2.85577	3.5393	0.00269843	0.0392196	-1.91844	UP
ENSMUSG00000038623	-0.283105	7.11594	-3.93909	0.0011569	0.0219639	-1.92302	NOT
ENSMUSG00000032532	2.11966	-0.900301	3.29318	0.0045441	0.0552079	-1.92331	UP
ENSMUSG00000005043	-0.399534	4.35074	-3.69783	0.00192812	0.0313398	-1.9249	NOT
ENSMUSG00000105176	-0.802373	1.19951	-3.37112	0.0038535	0.0494853	-1.93226	DOWN
ENSMUSG00000030662	0.348304	5.98533	3.86201	0.00136173	0.0247139	-1.93449	NOT
ENSMUSG00000024383	-0.358213	5.1728	-3.77861	0.00162476	0.0277954	-1.94124	NOT
ENSMUSG00000079179	-0.339794	4.63522	-3.72248	0.00182997	0.0302355	-1.94342	NOT
ENSMUSG00000066191	-0.37075	5.61275	-3.81812	0.00149432	0.0262988	-1.94487	NOT
ENSMUSG00000045636	-0.238888	8.89072	-3.99802	0.00102148	0.0203006	-1.95339	NOT
ENSMUSG00000020315	0.769571	3.07749	3.54572	0.00266197	0.0388509	-1.95647	UP
ENSMUSG00000064090	-0.285698	5.26979	-3.78166	0.00161429	0.0276859	-1.95748	NOT
ENSMUSG00000074412	1.34385	-2.26541	3.25793	0.00489533	0.0581486	-1.96079	UP
ENSMUSG00000044468	0.348491	7.62363	3.94923	0.00113237	0.0217636	-1.9627	NOT
ENSMUSG00000009035	0.235271	7.86936	3.95785	0.00111194	0.0214297	-1.96622	NOT
ENSMUSG00000022672	-0.506994	4.30004	-3.66935	0.00204811	0.0325722	-1.96653	NOT
ENSMUSG00000062110	-0.391756	3.78782	-3.61064	0.00231963	0.0354689	-1.96942	NOT
ENSMUSG00000040749	-0.667992	2.17204	-3.42963	0.00340451	0.045171	-1.97128	DOWN
ENSMUSG00000105814	0.947333	0.0874576	3.29889	0.00448958	0.0548417	-1.97398	UP
ENSMUSG00000031216	-0.307269	6.73584	-3.89215	0.00127762	0.0237411	-1.97425	NOT
ENSMUSG00000016534	0.28756	9.74181	4.01048	0.000994979	0.020018	-1.97724	NOT
ENSMUSG00000030748	-0.264867	8.57574	-3.97528	0.00107173	0.0209451	-1.98061	NOT
ENSMUSG00000047213	-0.234598	7.05622	-3.90751	0.00123678	0.0231665	-1.984	NOT
ENSMUSG00000086682	-0.56712	2.47756	-3.4537	0.00323524	0.043796	-1.98436	NOT
ENSMUSG00000021286	0.334906	5.93812	3.83231	0.00145008	0.0258488	-1.98906	NOT
ENSMUSG00000001156	-0.334141	5.60159	-3.79671	0.00156366	0.0271816	-1.98956	NOT
ENSMUSG00000022500	0.300537	7.74809	3.9417	0.00115054	0.0219323	-1.98998	NOT
ENSMUSG00000038127	-0.263116	7.06605	-3.90483	0.0012438	0.0232358	-1.99032	NOT
ENSMUSG00000001025	1.45289	-1.59818	3.24195	0.00506331	0.0595152	-1.99551	UP
ENSMUSG00000053113	-0.495284	5.86702	-3.81379	0.00150809	0.0264453	-1.99737	NOT
ENSMUSG00000056888	0.505434	3.50988	3.57522	0.00250057	0.0373115	-1.99809	NOT
ENSMUSG00000040253	-0.410519	6.37573	-3.85461	0.00138324	0.0249969	-1.99829	NOT
ENSMUSG00000036199	0.303326	5.82216	3.81803	0.0014946	0.0262988	-1.99861	NOT
ENSMUSG00000012017	0.337	5.54172	3.79149	0.00158104	0.0273533	-2.004	NOT
ENSMUSG00000070394	0.356282	4.69732	3.709	0.001883	0.0307849	-2.00474	NOT
ENSMUSG00000059070	0.311823	6.16238	3.84221	0.00142004	0.0254752	-2.00562	NOT
ENSMUSG00000031447	0.211745	10.5754	4.01613	0.00098317	0.0198935	-2.00731	NOT
ENSMUSG00000020437	-0.375163	5.95388	-3.8176	0.00149598	0.0262988	-2.00796	NOT
ENSMUSG00000028743	0.319961	5.11097	3.74729	0.00173623	0.028985	-2.01287	NOT
ENSMUSG00000086004	-1.42886	1.24127	-3.32475	0.00425065	0.0529386	-2.01456	DOWN
ENSMUSG00000087370	-0.299632	7.11923	-3.89603	0.00126717	0.0235781	-2.01463	NOT
ENSMUSG00000027544	-0.324392	7.00927	-3.889	0.00128615	0.0238363	-2.01593	NOT
ENSMUSG00000078671	-0.376286	5.73192	-3.79438	0.00157138	0.0272483	-2.01688	NOT
ENSMUSG00000048490	-0.233545	8.92866	-3.96922	0.00108554	0.0211243	-2.01702	NOT
ENSMUSG00000026880	0.354709	4.29982	3.65821	0.00209709	0.0330138	-2.01896	NOT
ENSMUSG00000058093	-0.528191	3.00374	-3.49104	0.00298908	0.0420381	-2.02138	NOT
ENSMUSG00000083816	-1.92753	-1.67804	-3.22105	0.00529165	0.0610714	-2.02686	DOWN
ENSMUSG00000036676	-0.379042	4.7251	-3.69179	0.00195299	0.0315796	-2.02724	NOT
ENSMUSG00000034855	2.18435	1.02389	3.32265	0.00426957	0.0530327	-2.02745	UP
ENSMUSG00000024909	0.568346	4.13172	3.63371	0.00220888	0.0340844	-2.03183	NOT
ENSMUSG00000042410	-0.216343	7.41044	-3.90226	0.00125058	0.0233313	-2.03502	NOT
ENSMUSG00000028044	0.575729	2.03418	3.39753	0.00364396	0.0474053	-2.03728	NOT
ENSMUSG00000093858	-1.30098	-0.586237	-3.23216	0.00516906	0.0603028	-2.03953	DOWN
ENSMUSG00000015355	0.354299	6.99322	3.87978	0.00131149	0.0239509	-2.04329	NOT
ENSMUSG00000038593	0.477773	3.21521	3.51841	0.00282061	0.040244	-2.04361	NOT
ENSMUSG00000085720	0.974225	-1	3.22506	0.00524698	0.0608418	-2.04543	UP
ENSMUSG00000102752	-0.463067	4.72841	-3.68098	0.00199824	0.0320702	-2.04633	NOT
ENSMUSG00000025630	0.283444	6.53779	3.84937	0.00139867	0.0252211	-2.04775	NOT
ENSMUSG00000066042	-0.443089	4.17491	-3.61729	0.00228717	0.0350224	-2.04904	NOT
ENSMUSG00000031029	0.445915	4.75479	3.69303	0.00194787	0.031551	-2.05233	NOT
ENSMUSG00000004285	0.305353	6.23745	3.82413	0.00147542	0.0261012	-2.056	NOT
ENSMUSG00000061079	-0.367349	5.30012	-3.73607	0.00177801	0.0295512	-2.05658	NOT
ENSMUSG00000043008	0.272233	7.73998	3.90986	0.00123064	0.0230824	-2.0567	NOT
ENSMUSG00000086874	-1.56918	-2.22433	-3.20383	0.00548731	0.0626591	-2.0575	DOWN
ENSMUSG00000105561	-0.58499	2.18966	-3.38476	0.00374382	0.0483008	-2.06848	DOWN
ENSMUSG00000042680	1.158	0.362302	3.26286	0.00484463	0.0578671	-2.07024	UP
ENSMUSG00000031387	0.25475	7.26517	3.88033	0.00130995	0.0239509	-2.0719	NOT
ENSMUSG00000028035	-0.350681	4.62366	-3.65909	0.00209317	0.0329892	-2.07338	NOT
ENSMUSG00000046204	-0.823235	1.3837	-3.3109	0.00437696	0.0540054	-2.07754	DOWN
ENSMUSG00000025044	1.232	1.94437	3.36909	0.00387006	0.0496097	-2.08152	UP
ENSMUSG00000031196	-2.03862	-0.619031	-3.20106	0.00551949	0.0628728	-2.08847	DOWN
ENSMUSG00000038527	-0.491316	4.19614	-3.59988	0.00237318	0.0359078	-2.08893	NOT
ENSMUSG00000114656	-1.94232	-1.77323	-3.18474	0.00571266	0.0642022	-2.09092	DOWN
ENSMUSG00000027490	0.879236	2.68393	3.43671	0.00335381	0.0449667	-2.09198	UP
ENSMUSG00000095432	-0.277933	5.66035	-3.75413	0.00171126	0.0286457	-2.09201	NOT
ENSMUSG00000079227	-0.210945	9.24871	-3.94189	0.00115007	0.0219323	-2.0941	NOT
ENSMUSG00000031015	-0.247958	6.74727	-3.8367	0.00143667	0.0256422	-2.09468	NOT
ENSMUSG00000001794	0.287274	5.41181	3.73323	0.00178875	0.0296763	-2.10173	NOT
ENSMUSG00000004626	0.255855	6.8686	3.84268	0.00141862	0.0254752	-2.1059	NOT
ENSMUSG00000079481	-0.582955	4.83467	-3.66011	0.00208866	0.0329732	-2.10902	NOT
ENSMUSG00000006611	-0.24431	7.70107	-3.88064	0.00130911	0.0239509	-2.1095	NOT
ENSMUSG00000018286	0.243607	6.93005	3.84425	0.00141391	0.0254304	-2.11013	NOT
ENSMUSG00000104030	-0.869338	2.0962	-3.35143	0.00401745	0.0508938	-2.11058	DOWN
ENSMUSG00000064264	-0.880742	0.458172	-3.23617	0.0051255	0.0599944	-2.11212	DOWN
ENSMUSG00000026110	-0.281796	8.00987	-3.88741	0.00129048	0.0238535	-2.12284	NOT
ENSMUSG00000002043	0.411647	4.07735	3.57663	0.00249308	0.0372393	-2.13657	NOT
ENSMUSG00000033365	-0.261572	6.96926	-3.82633	0.00146857	0.0260457	-2.14517	NOT
ENSMUSG00000045934	0.86587	1.4892	3.29623	0.00451484	0.0550663	-2.14938	UP
ENSMUSG00000029177	0.75175	2.2058	3.35871	0.00395602	0.0503889	-2.15069	UP
ENSMUSG00000023805	0.491646	4.39012	3.60635	0.00234085	0.0356109	-2.1513	NOT
ENSMUSG00000036751	0.353182	6.1045	3.76909	0.00165787	0.0281055	-2.15141	NOT
ENSMUSG00000056091	-0.198828	8.31911	-3.88084	0.00130856	0.0239509	-2.16307	NOT
ENSMUSG00000005947	-0.506505	3.56722	-3.48682	0.00301597	0.0421303	-2.16751	NOT
ENSMUSG00000117183	-1.00748	1.00501	-3.23678	0.00511882	0.0599664	-2.16796	DOWN
ENSMUSG00000041000	-0.47723	3.46533	-3.47353	0.0031021	0.042695	-2.1708	NOT
ENSMUSG00000037347	-0.284432	7.30044	-3.83121	0.00145347	0.0258762	-2.17284	NOT
ENSMUSG00000028525	-0.517869	5.15459	-3.66261	0.00207762	0.0329294	-2.17543	NOT
ENSMUSG00000038843	-0.251288	8.55195	-3.88233	0.00130444	0.0239509	-2.17664	NOT
ENSMUSG00000028145	-0.533513	2.4993	-3.36124	0.00393492	0.050183	-2.17866	NOT
ENSMUSG00000060591	1.50378	-0.623047	3.16308	0.00597932	0.0657632	-2.18224	UP
ENSMUSG00000028333	0.384322	4.729	3.62808	0.00223543	0.0344561	-2.18257	NOT
ENSMUSG00000097743	-0.683807	1.62833	-3.27814	0.00469081	0.056463	-2.18276	DOWN
ENSMUSG00000003746	-0.24868	8.22256	-3.8675	0.00134601	0.0244604	-2.18328	NOT
ENSMUSG00000038390	0.931415	1.57534	3.28419	0.00463116	0.0559855	-2.18782	UP
ENSMUSG00000030161	0.36061	5.14599	3.66709	0.00205797	0.0326548	-2.18967	NOT
ENSMUSG00000114370	-1.0855	0.0970167	-3.17021	0.00589018	0.0653096	-2.2042	DOWN
ENSMUSG00000111212	-1.07038	0.720486	-3.2011	0.00551904	0.0628728	-2.20552	DOWN
ENSMUSG00000032593	-0.925629	2.58771	-3.34594	0.00406438	0.0512973	-2.214	DOWN
ENSMUSG00000068220	0.87369	1.10735	3.23472	0.00514115	0.0601275	-2.21414	UP
ENSMUSG00000075225	-0.45454	4.80694	-3.60521	0.00234652	0.0356584	-2.22329	NOT
ENSMUSG00000052160	-0.206709	10.7361	-3.91683	0.00121264	0.0227751	-2.22452	NOT
ENSMUSG00000021477	0.413488	10.1941	3.90519	0.00124286	0.0232358	-2.22486	NOT
ENSMUSG00000074281	-0.707876	1.60978	-3.25418	0.00493425	0.0584393	-2.22744	DOWN
ENSMUSG00000035692	0.943475	2.4309	3.34279	0.00409155	0.0514602	-2.22997	UP
ENSMUSG00000030054	-0.50409	4.73042	-3.59258	0.00241019	0.0363109	-2.23023	NOT
ENSMUSG00000015112	0.584635	2.89265	3.39048	0.00369874	0.04794	-2.23223	NOT
ENSMUSG00000107023	-0.740957	0.528318	-3.17867	0.00578615	0.0647522	-2.23297	DOWN
ENSMUSG00000085912	-0.697263	1.5128	-3.24338	0.00504802	0.0593852	-2.2337	DOWN
ENSMUSG00000037580	0.530217	3.36734	3.44394	0.0033028	0.0444103	-2.23583	NOT
ENSMUSG00000037940	-0.275807	6.79954	-3.77263	0.00164546	0.0279789	-2.23679	NOT
ENSMUSG00000112301	-1.52314	-2.39535	-3.09967	0.00683245	0.0717613	-2.23961	DOWN
ENSMUSG00000020829	-0.280225	7.91582	-3.82767	0.00146442	0.0260051	-2.24145	NOT
ENSMUSG00000028698	-1.01586	1.44784	-3.22827	0.00521157	0.0606473	-2.24593	DOWN
ENSMUSG00000025702	0.264525	6.04124	3.71744	0.00184963	0.0304169	-2.24907	NOT
ENSMUSG00000029465	0.347111	6.76202	3.76879	0.00165893	0.0281055	-2.24985	NOT
ENSMUSG00000023328	0.522472	4.792	3.60315	0.00235679	0.0357757	-2.25053	NOT
ENSMUSG00000082465	-1.354	-1.24485	-3.10036	0.00682259	0.0717114	-2.25503	DOWN
ENSMUSG00000034765	1.5552	-0.323922	3.13418	0.00635427	0.0686957	-2.25765	UP
ENSMUSG00000025997	-0.87659	2.48361	-3.31403	0.00434811	0.053865	-2.25855	DOWN
ENSMUSG00000110869	-0.96142	0.644157	-3.16772	0.00592123	0.0653822	-2.26274	DOWN
ENSMUSG00000075272	-0.699964	0.829611	-3.18029	0.00576646	0.0646351	-2.26438	DOWN
ENSMUSG00000054604	-0.305842	7.24197	-3.78323	0.00160895	0.02766	-2.26797	NOT
ENSMUSG00000000134	-0.201382	8.14503	-3.82472	0.00147358	0.0261012	-2.26835	NOT
ENSMUSG00000022456	1.63553	-1.97432	3.08142	0.00709956	0.0738471	-2.27724	UP
ENSMUSG00000057246	1.11661	-0.486459	3.1132	0.00664102	0.070575	-2.28452	UP
ENSMUSG00000041685	-0.197464	7.41702	-3.78339	0.00160837	0.02766	-2.28829	NOT
ENSMUSG00000041702	-0.30831	4.97282	-3.59304	0.00240785	0.0363109	-2.29236	NOT
ENSMUSG00000037572	0.78095	2.45591	3.31361	0.004352	0.0538656	-2.29395	UP
ENSMUSG00000078435	-0.475505	3.32391	-3.39649	0.003652	0.0474397	-2.29562	NOT
ENSMUSG00000008226	-0.28411	5.02532	-3.59401	0.00240291	0.0362793	-2.30257	NOT
ENSMUSG00000044950	-0.25726	7.22103	-3.766	0.00166875	0.0281358	-2.30289	NOT
ENSMUSG00000026104	0.637497	5.23535	3.62288	0.00226023	0.0347852	-2.30343	UP
ENSMUSG00000055413	1.45219	1.95394	3.25823	0.00489226	0.0581486	-2.30655	UP
ENSMUSG00000084821	1.1025	1.66525	3.23113	0.00518023	0.0603326	-2.30964	UP
ENSMUSG00000029814	-1.22404	-0.849308	-3.07991	0.00712207	0.0740262	-2.31019	DOWN
ENSMUSG00000063455	-0.452699	3.83488	-3.45143	0.0032508	0.0439642	-2.31028	NOT
ENSMUSG00000026271	-0.585478	4.4973	-3.52437	0.00278521	0.0399013	-2.31442	DOWN
ENSMUSG00000024174	-0.470787	3.69494	-3.43064	0.00339722	0.045171	-2.31583	NOT
ENSMUSG00000057914	-0.426657	3.92587	-3.45728	0.00321077	0.043549	-2.32186	NOT
ENSMUSG00000022893	1.20398	3.8484	3.45638	0.00321688	0.0435897	-2.32747	UP
ENSMUSG00000025290	0.498287	4.94553	3.57979	0.00247643	0.0370697	-2.33285	NOT
ENSMUSG00000006930	1.00097	1.42027	3.1968	0.00556929	0.0632858	-2.3371	UP
ENSMUSG00000026819	0.490278	5.65438	3.6444	0.0021594	0.0335797	-2.33742	NOT
ENSMUSG00000022186	0.308045	7.78068	3.77764	0.00162809	0.0277982	-2.34137	NOT
ENSMUSG00000060550	1.42879	1.43805	3.19435	0.00559814	0.0633858	-2.34519	UP
ENSMUSG00000019054	0.299877	5.87093	3.65734	0.00210095	0.0330375	-2.34701	NOT
ENSMUSG00000101778	-0.594842	2.54733	-3.28216	0.00465109	0.0560685	-2.34795	DOWN
ENSMUSG00000018381	-0.204154	7.64991	-3.76342	0.00167792	0.0281984	-2.35402	NOT
ENSMUSG00000040599	-0.281082	5.42212	-3.60803	0.00233253	0.0355229	-2.35446	NOT
ENSMUSG00000104339	-0.567392	5.04932	-3.56335	0.00256427	0.0379387	-2.36034	NOT
ENSMUSG00000026806	0.321182	6.18224	3.67353	0.00203006	0.0323586	-2.36615	NOT
ENSMUSG00000043940	-0.206607	8.12307	-3.77478	0.00163801	0.027886	-2.37244	NOT
ENSMUSG00000029528	-0.233309	7.87139	-3.76325	0.0016785	0.0281984	-2.37475	NOT
ENSMUSG00000048126	-0.470734	5.3224	-3.58601	0.00244402	0.0366237	-2.37502	NOT
ENSMUSG00000021606	0.35124	4.16123	3.47174	0.00311391	0.0427736	-2.37571	NOT
ENSMUSG00000022372	-0.200313	8.36938	-3.78163	0.0016144	0.0276859	-2.37757	NOT
ENSMUSG00000055370	-1.24677	-0.565517	-3.05082	0.0075703	0.076972	-2.3796	DOWN
ENSMUSG00000100783	-1.27226	-0.876228	-3.04062	0.00773395	0.0778451	-2.38042	DOWN
ENSMUSG00000028161	-0.197247	7.23969	-3.7293	0.0018037	0.0298719	-2.38376	NOT
ENSMUSG00000021759	0.312185	6.12547	3.66022	0.00208816	0.0329732	-2.38484	NOT
ENSMUSG00000035042	1.71517	0.093243	3.08603	0.0070311	0.0732602	-2.38594	UP
ENSMUSG00000029072	-1.02903	0.545417	-3.09706	0.00687003	0.0720479	-2.38704	DOWN
ENSMUSG00000006395	0.389915	3.76707	3.41597	0.00350441	0.0459294	-2.39252	NOT
ENSMUSG00000058454	0.378149	5.1573	3.5695	0.00253108	0.0375667	-2.39771	NOT
ENSMUSG00000036943	-0.248752	8.0955	-3.75991	0.00169043	0.0283308	-2.40118	NOT
ENSMUSG00000032468	-0.312781	5.24602	-3.56776	0.00254042	0.0376654	-2.40255	NOT
ENSMUSG00000030652	0.482565	3.48025	3.37647	0.00381011	0.0490206	-2.40313	NOT
ENSMUSG00000020803	0.318252	5.08562	3.55934	0.00258618	0.038142	-2.40337	NOT
ENSMUSG00000045868	0.70967	0.406678	3.09095	0.00695883	0.0726529	-2.40513	UP
ENSMUSG00000020717	-0.391821	5.09872	-3.54991	0.00263842	0.0386683	-2.40635	NOT
ENSMUSG00000097926	-1.48831	-1.71588	-3.00808	0.00827937	0.0814496	-2.40643	DOWN
ENSMUSG00000093044	-1.45926	-2.51165	-3.00267	0.00837364	0.0818153	-2.40677	DOWN
ENSMUSG00000114150	-0.80594	0.951718	-3.11299	0.00664395	0.070575	-2.40856	DOWN
ENSMUSG00000008682	0.396553	6.42074	3.66767	0.00205544	0.0326517	-2.41652	NOT
ENSMUSG00000103332	-0.736817	2.61679	-3.25082	0.00496939	0.0586958	-2.41887	DOWN
ENSMUSG00000044788	-0.983711	0.317814	-3.06713	0.00731574	0.0753129	-2.42235	DOWN
ENSMUSG00000026600	0.384519	7.06454	3.70486	0.0018996	0.0310201	-2.42281	NOT
ENSMUSG00000023019	-0.536471	4.52308	-3.47614	0.003085	0.0426537	-2.42383	NOT
ENSMUSG00000024665	2.16052	-0.73997	3.02926	0.00792028	0.079148	-2.42475	UP
ENSMUSG00000001034	-0.29283	6.2167	-3.64053	0.00217719	0.0337441	-2.42957	NOT
ENSMUSG00000003072	0.276389	6.33576	3.6542	0.00211498	0.0331836	-2.43085	NOT
ENSMUSG00000050138	-0.364841	5.75589	-3.60049	0.0023701	0.0358999	-2.43151	NOT
ENSMUSG00000021573	-0.347203	6.90103	-3.68523	0.00198032	0.0318557	-2.43371	NOT
ENSMUSG00000003970	0.421375	6.38334	3.65602	0.00210683	0.0330928	-2.43566	NOT
ENSMUSG00000004500	-0.340506	5.01849	-3.52585	0.00277649	0.0398172	-2.44198	NOT
ENSMUSG00000028649	-0.260636	8.26065	-3.74688	0.00173774	0.028985	-2.44209	NOT
ENSMUSG00000021244	-0.388784	4.77861	-3.49929	0.00293731	0.0414865	-2.44332	NOT
ENSMUSG00000056537	-0.269974	6.01966	-3.61738	0.00228672	0.0350224	-2.44588	NOT
ENSMUSG00000081270	-0.703108	1.26278	-3.11616	0.00659972	0.0704129	-2.44722	DOWN
ENSMUSG00000030148	-0.350803	5.48526	-3.55944	0.00258565	0.038142	-2.46677	NOT
ENSMUSG00000024513	0.321712	5.12004	3.53116	0.00274543	0.0395112	-2.46987	NOT
ENSMUSG00000028232	-0.280673	5.87684	-3.59204	0.00241295	0.0363134	-2.47374	NOT
ENSMUSG00000020246	-0.445353	4.44379	-3.44518	0.00329416	0.0443367	-2.4746	NOT
ENSMUSG00000049588	1.21767	0.275975	3.0487	0.00760404	0.0771529	-2.47497	UP
ENSMUSG00000038059	0.490897	5.5614	3.57079	0.00252417	0.0375039	-2.47526	NOT
ENSMUSG00000069273	-1.22341	-0.816169	-2.98947	0.00860806	0.0833514	-2.47779	DOWN
ENSMUSG00000008475	0.181908	7.92998	3.71909	0.00184316	0.0303643	-2.47794	NOT
ENSMUSG00000015843	0.924216	2.20265	3.19581	0.00558088	0.063366	-2.48076	UP
ENSMUSG00000032690	1.48584	1.18834	3.10584	0.00674449	0.0713185	-2.48122	UP
ENSMUSG00000073758	-0.892157	0.360655	-3.03806	0.00777562	0.0780402	-2.48331	DOWN
ENSMUSG00000042286	-0.34977	9.47165	-3.76069	0.00168762	0.0283176	-2.49036	NOT
ENSMUSG00000030346	0.936343	1.64289	3.13313	0.00636836	0.068795	-2.50065	UP
ENSMUSG00000112640	-0.852895	-0.122421	-3.00218	0.00838224	0.0818422	-2.50682	DOWN
ENSMUSG00000044952	-0.373848	5.34088	-3.52626	0.00277405	0.0398172	-2.50774	NOT
ENSMUSG00000103223	-0.56606	2.36263	-3.18388	0.005723	0.0642507	-2.50845	NOT
ENSMUSG00000062040	-0.503439	3.49644	-3.31072	0.00437872	0.0540054	-2.51255	NOT
ENSMUSG00000052331	-0.248541	7.41877	-3.67721	0.00201428	0.0322407	-2.51277	NOT
ENSMUSG00000036275	0.190611	7.98268	3.70406	0.00190283	0.0310368	-2.51446	NOT
ENSMUSG00000050608	0.283008	5.49795	3.54484	0.00266692	0.0388592	-2.51535	NOT
ENSMUSG00000059401	-0.616284	2.92552	-3.24029	0.00508109	0.059674	-2.5164	DOWN
ENSMUSG00000021285	0.294279	5.90873	3.57894	0.00248093	0.0370974	-2.51911	NOT
ENSMUSG00000022544	0.331453	4.81684	3.47613	0.00308507	0.0426537	-2.52031	NOT
ENSMUSG00000037966	-0.245947	6.83053	-3.6407	0.00217641	0.0337441	-2.52085	NOT
ENSMUSG00000007411	-0.190784	7.47848	-3.67579	0.00202037	0.0322407	-2.52277	NOT
ENSMUSG00000034653	-0.427844	3.70022	-3.33212	0.00418498	0.05226	-2.52512	NOT
ENSMUSG00000058258	0.809853	0.752329	3.04996	0.00758392	0.0770546	-2.52701	UP
ENSMUSG00000033885	-0.224315	6.40708	-3.60926	0.00232645	0.0354689	-2.52752	NOT
ENSMUSG00000053565	0.292111	5.21631	3.51237	0.00285696	0.0407211	-2.52848	NOT
ENSMUSG00000058153	-1.2896	-0.6863	-2.96468	0.0090659	0.0862923	-2.53042	DOWN
ENSMUSG00000074629	-0.654206	2.30418	-3.16602	0.00594236	0.0655259	-2.53065	DOWN
ENSMUSG00000013663	-0.223284	7.25849	-3.66047	0.00208706	0.0329732	-2.5312	NOT
ENSMUSG00000057113	0.338298	5.70318	3.55537	0.00260805	0.0383435	-2.53223	NOT
ENSMUSG00000033182	-1.35748	0.308287	-3.00424	0.00834621	0.0816903	-2.53408	DOWN
ENSMUSG00000006281	0.288507	6.22176	3.59589	0.00239332	0.0361735	-2.53602	NOT
ENSMUSG00000037210	-0.324982	5.03855	-3.48247	0.0030439	0.0423937	-2.53804	NOT
ENSMUSG00000005779	0.272915	5.7553	3.5559	0.00260513	0.0383435	-2.53974	NOT
ENSMUSG00000031217	-0.393442	5.67694	-3.54071	0.00269039	0.0391433	-2.54161	NOT
ENSMUSG00000040325	-0.435242	4.24958	-3.38824	0.00371635	0.0481237	-2.54639	NOT
ENSMUSG00000108238	-0.913898	1.00377	-3.04294	0.00769647	0.0778179	-2.54867	DOWN
ENSMUSG00000004562	-0.241494	8.02959	-3.68664	0.00197441	0.0317971	-2.55095	NOT
ENSMUSG00000022564	0.260442	7.79372	3.67857	0.0020085	0.032198	-2.55221	NOT
ENSMUSG00000024251	-0.258431	5.95212	-3.56102	0.00257702	0.0380871	-2.5533	NOT
ENSMUSG00000097077	-0.906564	1.2747	-3.06023	0.00742242	0.0760758	-2.5534	DOWN
ENSMUSG00000043572	-0.503712	3.43385	-3.28253	0.00464744	0.0560685	-2.55631	NOT
ENSMUSG00000020787	-0.498399	4.11515	-3.36331	0.0039177	0.050083	-2.56229	NOT
ENSMUSG00000061666	-0.414026	3.94713	-3.34344	0.00408593	0.0514357	-2.56389	NOT
ENSMUSG00000028862	1.28512	-0.425804	2.9666	0.00902967	0.0860644	-2.56432	UP
ENSMUSG00000034889	-0.28335	6.06859	-3.56505	0.00255506	0.0378424	-2.56435	NOT
ENSMUSG00000046269	-0.840962	0.165127	-2.98531	0.0086834	0.0839056	-2.5652	DOWN
ENSMUSG00000025217	-0.307778	5.14614	-3.4803	0.0030579	0.0425464	-2.56605	NOT
ENSMUSG00000055826	-1.22227	-2.06676	-2.91224	0.0101137	0.0925579	-2.5681	DOWN
ENSMUSG00000081208	-0.95793	0.989935	-3.03174	0.00787916	0.0789099	-2.5691	DOWN
ENSMUSG00000028367	0.377511	4.57389	3.42425	0.00344348	0.0454728	-2.5742	NOT
ENSMUSG00000071655	0.284455	5.8302	3.54595	0.00266063	0.0388509	-2.57436	NOT
ENSMUSG00000025647	0.261415	8.4459	3.69113	0.0019557	0.0315796	-2.57914	NOT
ENSMUSG00000002147	-0.17983	8.50003	-3.69096	0.0019564	0.0315796	-2.57976	NOT
ENSMUSG00000041406	-0.58257	2.47738	-3.15858	0.00603622	0.0662282	-2.58326	NOT
ENSMUSG00000053714	-0.566888	2.69064	-3.18033	0.00576591	0.0646351	-2.58659	NOT
ENSMUSG00000086583	1.07024	-1.26365	2.923	0.00988946	0.091389	-2.58775	UP
ENSMUSG00000046185	-0.406239	5.21733	-3.47476	0.00309401	0.0426537	-2.58903	NOT
ENSMUSG00000014932	-0.325084	4.96908	-3.4508	0.00325519	0.0439811	-2.58934	NOT
ENSMUSG00000082319	0.952804	-1.45061	2.91416	0.0100733	0.0923069	-2.59399	UP
ENSMUSG00000024737	0.391394	5.10591	3.47026	0.00312369	0.0428107	-2.59569	NOT
ENSMUSG00000096606	-0.235629	7.67205	-3.64958	0.00213582	0.0333421	-2.59685	NOT
ENSMUSG00000086264	-0.829986	2.13538	-3.11234	0.00665301	0.0706177	-2.59888	DOWN
ENSMUSG00000022376	-0.684693	4.2982	-3.36108	0.00393627	0.050183	-2.60063	DOWN
ENSMUSG00000084199	-1.21057	-1.13977	-2.91153	0.0101286	0.0925579	-2.60234	DOWN
ENSMUSG00000045098	-0.20794	6.63763	-3.58911	0.00242797	0.0364612	-2.60449	NOT
ENSMUSG00000019734	-1.01546	0.0234486	-2.95572	0.00923718	0.0873883	-2.60466	DOWN
ENSMUSG00000062661	-0.361299	4.20068	-3.35281	0.00400576	0.0508733	-2.61104	NOT
ENSMUSG00000037913	-0.506404	2.73606	-3.1736	0.00584824	0.0651349	-2.61202	NOT
ENSMUSG00000112550	-0.990567	-0.681402	-2.92198	0.00991049	0.0914127	-2.61231	DOWN
ENSMUSG00000107838	-1.24399	-1.02976	-2.90882	0.0101859	0.092672	-2.61291	DOWN
ENSMUSG00000016087	-0.191907	8.098	-3.65985	0.0020898	0.0329732	-2.61409	NOT
ENSMUSG00000034255	-0.196444	8.71109	-3.68154	0.00199588	0.0320692	-2.61425	NOT
ENSMUSG00000025013	-1.32489	-1.23089	-2.90174	0.0103372	0.0934813	-2.61483	DOWN
ENSMUSG00000024399	-0.545974	2.90666	-3.18981	0.00565197	0.0637598	-2.61764	NOT
ENSMUSG00000097090	-0.791652	1.9985	-3.09123	0.00695474	0.0726529	-2.61764	DOWN
ENSMUSG00000071451	0.478738	2.82511	3.1931	0.00561283	0.0634686	-2.61905	NOT
ENSMUSG00000106870	-0.87434	1.58665	-3.05195	0.00755231	0.0769567	-2.61916	DOWN
ENSMUSG00000081344	0.754079	0.0344428	2.95738	0.00920521	0.0871447	-2.621	UP
ENSMUSG00000094344	1.23826	-2.05632	2.8855	0.0106926	0.0950977	-2.62146	UP
ENSMUSG00000025231	-0.274671	5.98962	-3.53094	0.00274669	0.0395112	-2.62232	NOT
ENSMUSG00000085546	-1.43464	-2.09277	-2.88007	0.0108139	0.0956024	-2.62247	DOWN
ENSMUSG00000020372	0.313995	6.17671	3.5515	0.00262951	0.038578	-2.62255	NOT
ENSMUSG00000053550	1.00234	0.214612	2.9669	0.00902395	0.0860644	-2.62318	UP
ENSMUSG00000038151	-0.276074	5.8641	-3.51971	0.00281286	0.0401743	-2.62368	NOT
ENSMUSG00000028108	1.26179	0.256822	2.96899	0.00898465	0.0858104	-2.62525	UP
ENSMUSG00000028517	-0.533832	3.56783	-3.26454	0.00482749	0.0577116	-2.62573	NOT
ENSMUSG00000028639	0.210802	6.96072	3.60183	0.00236337	0.0358368	-2.62686	NOT
ENSMUSG00000030557	-0.214192	9.14095	-3.6879	0.00196916	0.031749	-2.62727	NOT
ENSMUSG00000058163	0.658826	4.11893	3.34556	0.00406761	0.0512973	-2.63035	UP
ENSMUSG00000035208	0.323167	6.52089	3.57295	0.00251264	0.0374118	-2.63071	NOT
ENSMUSG00000018339	1.61952	0.398526	2.97168	0.00893432	0.0855046	-2.63704	UP
ENSMUSG00000027248	-0.217729	10.2815	-3.71171	0.00187224	0.0306807	-2.63727	NOT
ENSMUSG00000055240	-0.55518	2.8431	-3.16767	0.00592177	0.0653822	-2.64638	NOT
ENSMUSG00000115543	1.60617	-0.646174	2.91128	0.010134	0.0925579	-2.65021	UP
ENSMUSG00000047648	-0.318298	5.05851	-3.42978	0.00340341	0.045171	-2.65305	NOT
ENSMUSG00000030655	-0.390882	5.9522	-3.51086	0.00286611	0.04081	-2.65429	NOT
ENSMUSG00000018008	-0.27734	11.0718	-3.71948	0.00184165	0.0303643	-2.66001	NOT
ENSMUSG00000046447	-0.66286	2.99769	-3.17481	0.00583339	0.0651064	-2.66358	DOWN
ENSMUSG00000037846	1.46768	-0.698129	2.90154	0.0103416	0.0934813	-2.66408	UP
ENSMUSG00000034987	-0.370904	4.97915	-3.41399	0.00351913	0.0460378	-2.66631	NOT
ENSMUSG00000054293	-0.377605	4.56409	-3.36852	0.00387478	0.0496248	-2.66668	NOT
ENSMUSG00000024505	-0.651044	2.35532	-3.10271	0.00678902	0.0715351	-2.6693	DOWN
ENSMUSG00000055692	0.698469	2.96997	3.18535	0.0057053	0.0642022	-2.67113	UP
ENSMUSG00000000202	-0.677373	1.77818	-3.04285	0.00769792	0.0778179	-2.67618	DOWN
ENSMUSG00000029570	-0.328414	6.41689	-3.53794	0.00270621	0.0392883	-2.67672	NOT
ENSMUSG00000107971	-0.547008	3.01741	-3.17161	0.00587288	0.0653096	-2.68037	NOT
ENSMUSG00000042699	0.47838	4.84737	3.40147	0.00361366	0.0470548	-2.68498	NOT
ENSMUSG00000020225	0.259911	6.36965	3.5332	0.00273355	0.0394031	-2.69119	NOT
ENSMUSG00000046207	-0.278353	6.65149	-3.54773	0.00265065	0.038807	-2.69204	NOT
ENSMUSG00000102930	-0.9344	0.653819	-2.94497	0.00944677	0.0886528	-2.69327	DOWN
ENSMUSG00000030737	-0.261024	11.3693	-3.71045	0.00187724	0.0307267	-2.69357	NOT
ENSMUSG00000049362	-1.48493	-2.36956	-2.83521	0.0118695	0.10234	-2.6942	DOWN
ENSMUSG00000071644	0.408613	5.0113	3.41321	0.00352494	0.0460708	-2.69526	NOT
ENSMUSG00000112023	1.00889	2.3648	3.1039	0.00677209	0.0714486	-2.69937	UP
ENSMUSG00000074916	-0.239787	5.32303	-3.43411	0.00337232	0.0450855	-2.70138	NOT
ENSMUSG00000067629	-0.660139	1.45781	-3.00168	0.00839108	0.0818508	-2.70279	DOWN
ENSMUSG00000037849	1.49561	1.10256	2.98137	0.00875521	0.0843517	-2.71167	UP
ENSMUSG00000055762	0.268327	5.91004	3.4858	0.00302249	0.0421784	-2.71478	NOT
ENSMUSG00000000386	0.74275	2.59699	3.12095	0.00653356	0.0698259	-2.71518	UP
ENSMUSG00000107733	-0.843879	1.67518	-3.01135	0.00822292	0.0812518	-2.71552	DOWN
ENSMUSG00000029581	-0.276404	9.08213	-3.64268	0.00216731	0.0336653	-2.71914	NOT
ENSMUSG00000021998	-0.193136	10.1707	-3.66995	0.00204555	0.0325684	-2.72028	NOT
ENSMUSG00000047963	-0.669874	2.82708	-3.12538	0.00647307	0.0693381	-2.7238	DOWN
ENSMUSG00000008140	0.229897	6.93106	3.55414	0.00261485	0.0384032	-2.72408	NOT
ENSMUSG00000025417	0.266436	5.53976	3.44545	0.00329227	0.0443367	-2.73177	NOT
ENSMUSG00000060063	-0.239365	6.75671	-3.53329	0.00273303	0.0394031	-2.73775	NOT
ENSMUSG00000044501	-0.299512	4.66313	-3.34635	0.00406089	0.0512973	-2.73902	NOT
ENSMUSG00000086212	-1.38865	-1.4398	-2.82433	0.0121402	0.103654	-2.74172	DOWN
ENSMUSG00000075576	-0.80768	-0.0164516	-2.88141	0.0107838	0.0956024	-2.74277	DOWN
ENSMUSG00000029449	0.945169	1.05137	2.9607	0.00914155	0.0867766	-2.74298	UP
ENSMUSG00000022378	-0.220247	8.82472	-3.62216	0.00226366	0.0347852	-2.74713	NOT
ENSMUSG00000108042	-0.716883	0.981372	-2.93961	0.0095528	0.0893487	-2.75038	DOWN
ENSMUSG00000047182	-0.905288	1.60808	-2.98615	0.00866812	0.0838158	-2.75043	DOWN
ENSMUSG00000037474	1.43696	0.635325	2.92395	0.00986994	0.0913618	-2.75711	UP
ENSMUSG00000037905	0.491373	3.64756	3.22479	0.00525	0.0608418	-2.75812	NOT
ENSMUSG00000073491	1.2104	0.526677	2.91557	0.0100439	0.0920977	-2.7588	UP
ENSMUSG00000070034	0.315302	5.64053	3.44056	0.00332657	0.0446871	-2.76161	NOT
ENSMUSG00000073155	0.298798	4.50424	3.32395	0.00425792	0.052982	-2.76552	NOT
ENSMUSG00000081660	-0.870166	-0.678595	-2.8388	0.0117815	0.101707	-2.76599	DOWN
ENSMUSG00000085009	-0.657335	2.05673	-3.02241	0.00803471	0.0797833	-2.76915	DOWN
ENSMUSG00000035455	0.553201	2.06152	3.03468	0.00783078	0.0784815	-2.77197	NOT
ENSMUSG00000040520	-0.28513	5.99309	-3.45816	0.00320478	0.0435098	-2.77593	NOT
ENSMUSG00000108394	-1.86981	-2.51552	-2.78028	0.0132985	0.108595	-2.7836	DOWN
ENSMUSG00000033278	-0.289703	7.05675	-3.52865	0.00276005	0.0396627	-2.78499	NOT
ENSMUSG00000020027	1.0089	0.405463	2.89314	0.010524	0.0943994	-2.78526	UP
ENSMUSG00000057335	-0.283389	7.20375	-3.53606	0.00271701	0.0392883	-2.78661	NOT
ENSMUSG00000054693	-0.207843	9.03097	-3.60955	0.00232502	0.0354689	-2.78674	NOT
ENSMUSG00000025766	-0.380249	3.87429	-3.22737	0.00522156	0.0607131	-2.78738	NOT
ENSMUSG00000029482	0.315806	5.12187	3.37885	0.00379093	0.0488186	-2.78924	NOT
ENSMUSG00000039936	-0.256807	8.54928	-3.59132	0.00241666	0.0363302	-2.79333	NOT
ENSMUSG00000002325	0.359251	6.74393	3.50972	0.00287304	0.0408672	-2.79509	NOT
ENSMUSG00000086946	-1.02723	-1.02246	-2.80814	0.012554	0.105515	-2.79638	DOWN
ENSMUSG00000030842	0.224912	6.52304	3.49296	0.00297693	0.0419194	-2.79834	NOT
ENSMUSG00000028282	-0.284219	4.85826	-3.33761	0.00413664	0.0518412	-2.8022	NOT
ENSMUSG00000026979	-0.278577	6.82304	-3.5063	0.00289398	0.0410165	-2.80271	NOT
ENSMUSG00000025421	-0.458012	2.87927	-3.09595	0.00688618	0.0721445	-2.80307	NOT
ENSMUSG00000006494	0.187625	7.52789	3.54617	0.00265942	0.0388509	-2.80614	NOT
ENSMUSG00000019998	0.180954	8.20928	3.57391	0.0025075	0.0373751	-2.80851	NOT
ENSMUSG00000001741	-0.23126	7.84882	-3.55545	0.0026076	0.0383435	-2.81241	NOT
ENSMUSG00000030120	0.211417	7.42472	3.53656	0.00271418	0.0392883	-2.81622	NOT
ENSMUSG00000008129	0.87621	1.06581	2.92349	0.00987938	0.0913663	-2.81687	UP
ENSMUSG00000038803	0.293921	4.24137	3.26811	0.00479123	0.0574742	-2.8174	NOT
ENSMUSG00000107881	-0.47565	2.74922	-3.07216	0.00723888	0.0747696	-2.82089	NOT
ENSMUSG00000020897	1.1584	1.20065	2.93258	0.00969394	0.0899786	-2.82144	UP
ENSMUSG00000042507	-0.255589	5.41599	-3.38481	0.00374341	0.0483008	-2.82217	NOT
ENSMUSG00000107966	-0.958327	1.62442	-2.94963	0.00935535	0.0882085	-2.82257	DOWN
ENSMUSG00000020538	0.256089	6.65627	3.49016	0.00299469	0.0420381	-2.82336	NOT
ENSMUSG00000009549	0.242192	5.63814	3.40738	0.00356878	0.0465569	-2.82955	NOT
ENSMUSG00000037894	0.285284	6.41811	3.46994	0.00312579	0.0428107	-2.83194	NOT
ENSMUSG00000062510	-0.461209	2.71872	-3.06317	0.00737673	0.075794	-2.83293	NOT
ENSMUSG00000110545	1.13805	-2.87424	2.75047	0.014142	0.113161	-2.83352	UP
ENSMUSG00000048163	-0.264869	13.0029	-3.67616	0.00201877	0.0322407	-2.83623	NOT
ENSMUSG00000040998	0.293944	6.7083	3.48686	0.0030157	0.0421303	-2.83781	NOT
ENSMUSG00000039988	-0.244317	5.89586	-3.42055	0.00347059	0.0456586	-2.83868	NOT
ENSMUSG00000031198	0.426404	2.9048	3.09304	0.00692835	0.0724967	-2.83927	NOT
ENSMUSG00000108137	-1.35869	-1.77117	-2.76045	0.013854	0.111557	-2.84024	DOWN
ENSMUSG00000046879	0.359923	6.40107	3.4651	0.00315802	0.0431297	-2.84035	NOT
ENSMUSG00000072692	0.656746	0.669271	2.8805	0.0108044	0.0956024	-2.84056	UP
ENSMUSG00000040407	-0.278532	6.4099	-3.45904	0.0031988	0.0435098	-2.84274	NOT
ENSMUSG00000038235	-0.206149	10.0928	-3.6101	0.00232228	0.0354689	-2.84291	NOT
ENSMUSG00000022793	-0.228275	7.14677	-3.50624	0.00289431	0.0410165	-2.84388	NOT
ENSMUSG00000002814	-0.236546	5.87156	-3.4159	0.00350493	0.0459294	-2.84429	NOT
ENSMUSG00000038170	-0.28796	6.97226	-3.49507	0.0029637	0.0417751	-2.84536	NOT
ENSMUSG00000024677	-0.289546	6.86562	-3.48832	0.00300639	0.0421225	-2.84582	NOT
ENSMUSG00000026219	-0.219572	6.31066	-3.44719	0.00328019	0.0442763	-2.8538	NOT
ENSMUSG00000085741	-0.496191	2.38225	-3.01474	0.00816478	0.0808457	-2.85427	NOT
ENSMUSG00000109244	-0.819071	1.17078	-2.89572	0.0104676	0.0942169	-2.86049	DOWN
ENSMUSG00000056608	-0.344007	6.80437	-3.47537	0.00309004	0.0426537	-2.86343	NOT
ENSMUSG00000029787	-0.253342	6.26699	-3.43867	0.00333991	0.0448232	-2.86348	NOT
ENSMUSG00000071379	0.368571	4.09798	3.22235	0.00527707	0.0610219	-2.87752	NOT
ENSMUSG00000060512	-0.28954	8.21578	-3.53603	0.00271721	0.0392883	-2.88424	NOT
ENSMUSG00000029994	0.390217	4.93304	3.31119	0.00437437	0.0540054	-2.89069	NOT
ENSMUSG00000002897	-0.218534	8.5496	-3.54464	0.00266809	0.0388592	-2.8924	NOT
ENSMUSG00000032020	-0.206523	7.9087	-3.51996	0.00281137	0.0401743	-2.89301	NOT
ENSMUSG00000041827	1.08034	1.10933	2.88629	0.0106749	0.0950977	-2.89644	UP
ENSMUSG00000074874	0.86202	-0.184564	2.7984	0.0128097	0.107054	-2.89714	UP
ENSMUSG00000109652	-0.737325	0.567277	-2.83307	0.0119221	0.102605	-2.8989	DOWN
ENSMUSG00000074800	1.01275	-0.995628	2.75976	0.0138737	0.111651	-2.89935	UP
ENSMUSG00000001473	0.313116	4.83489	3.29613	0.00451582	0.0550663	-2.89938	NOT
ENSMUSG00000064215	0.452789	6.31749	3.43076	0.00339632	0.045171	-2.90032	NOT
ENSMUSG00000113313	-1.03272	-0.288164	-2.78032	0.0132974	0.108595	-2.90198	DOWN
ENSMUSG00000102664	-0.978543	-0.454124	-2.77143	0.0135438	0.109753	-2.90465	DOWN
ENSMUSG00000025940	-0.267841	5.33165	-3.33665	0.00414502	0.0518998	-2.90546	NOT
ENSMUSG00000044827	0.23747	6.2579	3.42156	0.00346314	0.0456586	-2.90778	NOT
ENSMUSG00000027905	-0.313099	5.37676	-3.33862	0.0041278	0.0517768	-2.90918	NOT
ENSMUSG00000045538	-0.32009	4.86252	-3.2852	0.00462135	0.0559151	-2.91021	NOT
ENSMUSG00000021639	-0.259253	7.73571	-3.5032	0.00291307	0.0412043	-2.91158	NOT
ENSMUSG00000037355	0.31383	4.53984	3.25551	0.00492045	0.0583746	-2.91593	NOT
ENSMUSG00000115602	1.04342	-1.48893	2.73015	0.0147466	0.115557	-2.92003	UP
ENSMUSG00000049755	-0.243647	5.55627	-3.34946	0.00403419	0.0510597	-2.92426	NOT
ENSMUSG00000026648	-0.281143	5.13481	-3.3077	0.00440674	0.0542556	-2.92477	NOT
ENSMUSG00000026737	-0.189181	8.77846	-3.53613	0.00271665	0.0392883	-2.92623	NOT
ENSMUSG00000022565	1.0516	1.54411	2.90787	0.0102062	0.0927359	-2.92718	UP
ENSMUSG00000049672	-0.273381	5.6008	-3.3516	0.00401596	0.0508938	-2.92739	NOT
ENSMUSG00000064307	-0.798222	0.110789	-2.78923	0.0130547	0.10799	-2.92769	DOWN
ENSMUSG00000084319	0.820408	-0.676469	2.75617	0.013977	0.11216	-2.92985	UP
ENSMUSG00000003283	-0.183208	8.43208	-3.52285	0.00279418	0.039989	-2.9301	NOT
ENSMUSG00000050621	0.821512	-0.930745	2.74433	0.0143223	0.11373	-2.93115	UP
ENSMUSG00000104122	-1.50734	-1.52598	-2.71213	0.0153034	0.117425	-2.93366	DOWN
ENSMUSG00000073145	-0.616776	0.758131	-2.82826	0.0120416	0.103253	-2.93441	DOWN
ENSMUSG00000020644	0.423334	4.72312	3.26748	0.00479758	0.057498	-2.93497	NOT
ENSMUSG00000102570	-1.25401	-1.33503	-2.71827	0.0151113	0.116717	-2.93515	DOWN
ENSMUSG00000102324	-1.57462	-1.5632	-2.70978	0.0153774	0.117674	-2.93543	DOWN
ENSMUSG00000030451	-0.275194	7.30803	-3.47078	0.00312027	0.0428107	-2.93597	NOT
ENSMUSG00000019189	-0.242759	7.64449	-3.48741	0.00301216	0.0421303	-2.93635	NOT
ENSMUSG00000055108	-1.05642	-1.02261	-2.72661	0.0148545	0.115734	-2.94181	DOWN
ENSMUSG00000000275	0.516638	5.07951	3.30127	0.004467	0.054709	-2.94414	NOT
ENSMUSG00000110388	-0.405328	4.76329	-3.2546	0.00492984	0.0584366	-2.94837	NOT
ENSMUSG00000000732	-0.233268	7.40628	-3.46914	0.00313113	0.0428421	-2.95067	NOT
ENSMUSG00000001313	0.857515	0.169587	2.78878	0.0130668	0.108011	-2.95271	UP
ENSMUSG00000107205	-0.726421	1.60829	-2.8856	0.0106903	0.0950977	-2.95291	DOWN
ENSMUSG00000056124	-0.325263	4.76451	-3.25359	0.00494038	0.0584625	-2.95363	NOT
ENSMUSG00000021265	-0.4913	2.77358	-3.00847	0.00827268	0.0814496	-2.95387	NOT
ENSMUSG00000110914	-0.756191	2.79863	-3.00479	0.00833663	0.0816815	-2.95441	DOWN
ENSMUSG00000042331	-0.189174	7.78721	-3.48534	0.00302543	0.0421784	-2.95508	NOT
ENSMUSG00000017057	-0.171427	8.37845	-3.50888	0.00287821	0.0408991	-2.95568	NOT
ENSMUSG00000024521	0.686574	2.68883	3.01134	0.00822318	0.0812518	-2.9561	UP
ENSMUSG00000024073	-0.339769	5.30614	-3.30659	0.00441707	0.054335	-2.96016	NOT
ENSMUSG00000096957	-0.918247	-0.329806	-2.74705	0.0142421	0.113507	-2.96059	DOWN
ENSMUSG00000050912	0.231545	6.77357	3.43204	0.00338714	0.045171	-2.96101	NOT
ENSMUSG00000066571	0.267531	5.63967	3.34473	0.00407478	0.0513415	-2.96123	NOT
ENSMUSG00000112539	1.01415	-0.591081	2.74069	0.01443	0.114141	-2.96613	UP
ENSMUSG00000029343	-0.489691	7.84926	-3.47945	0.00306343	0.042581	-2.96862	NOT
ENSMUSG00000028949	-0.742406	0.793775	-2.81145	0.0124684	0.105238	-2.9689	DOWN
ENSMUSG00000030659	0.265021	5.02133	3.28186	0.00465403	0.0560685	-2.96893	NOT
ENSMUSG00000052407	-0.617281	2.42199	-2.95835	0.00918646	0.0870849	-2.96994	DOWN
ENSMUSG00000031813	0.275027	5.17033	3.29557	0.00452118	0.0550793	-2.97192	NOT
ENSMUSG00000103877	-1.16938	-0.51234	-2.72814	0.0148078	0.115734	-2.97501	DOWN
ENSMUSG00000082860	-0.802891	0.923358	-2.81415	0.0123988	0.10484	-2.9801	DOWN
ENSMUSG00000092178	-1.17986	-2.85201	-2.65669	0.0171461	0.125869	-2.98546	DOWN
ENSMUSG00000049550	0.212691	7.82545	3.47445	0.00309605	0.0426537	-2.98569	NOT
ENSMUSG00000055675	1.07938	-0.54774	2.73123	0.0147138	0.115493	-2.98752	UP
ENSMUSG00000034317	1.0034	0.888955	2.82014	0.012246	0.104303	-2.98922	UP
ENSMUSG00000028709	-0.288659	6.51853	-3.39613	0.00365476	0.0474397	-2.99102	NOT
ENSMUSG00000052299	-0.256156	6.13757	-3.36635	0.0038926	0.0498075	-2.99377	NOT
ENSMUSG00000034601	-0.343866	4.65544	-3.22069	0.00529566	0.0610714	-2.99532	NOT
ENSMUSG00000007030	-1.02627	0.511786	-2.77266	0.0135092	0.109753	-2.99959	DOWN
ENSMUSG00000099137	0.947029	-1.00831	2.70316	0.0155882	0.118709	-2.99968	UP
ENSMUSG00000022554	-0.357448	4.83122	-3.23695	0.00511703	0.0599664	-3.00088	NOT
ENSMUSG00000087361	1.33098	-2.75529	2.65158	0.0173265	0.126323	-3.00157	UP
ENSMUSG00000102336	-0.777388	2.36232	-2.93242	0.00969721	0.0899786	-3.00178	DOWN
ENSMUSG00000037697	0.358724	3.56068	3.0916	0.00694939	0.0726529	-3.0059	NOT
ENSMUSG00000059791	-0.313498	6.11621	-3.35644	0.00397506	0.0505854	-3.0089	NOT
ENSMUSG00000047786	-0.672022	1.2437	-2.82483	0.0121275	0.103609	-3.0102	DOWN
ENSMUSG00000086625	-1.18043	-1.96409	-2.65659	0.0171497	0.125869	-3.01206	DOWN
ENSMUSG00000020134	-0.242742	7.34153	-3.43568	0.00336112	0.0449902	-3.01384	NOT
ENSMUSG00000067847	0.313484	4.27604	3.17627	0.0058155	0.0650287	-3.01553	NOT
ENSMUSG00000034744	0.243783	5.67237	3.31818	0.00431011	0.0534889	-3.02206	NOT
ENSMUSG00000025393	0.213455	8.93933	3.49655	0.0029544	0.041686	-3.02266	NOT
ENSMUSG00000036916	-0.369944	3.9926	-3.12711	0.00644948	0.0692336	-3.02294	NOT
ENSMUSG00000037982	-1.00537	-0.338003	-2.70989	0.0153741	0.117674	-3.02593	DOWN
ENSMUSG00000087217	-1.14458	-0.913156	-2.68221	0.0162727	0.121924	-3.02668	DOWN
ENSMUSG00000099045	-1.1732	-2.03388	-2.64486	0.017566	0.126864	-3.02899	DOWN
ENSMUSG00000068966	-0.349579	4.61528	-3.19843	0.00555011	0.0631702	-3.03275	NOT
ENSMUSG00000003153	0.547162	3.77361	3.10615	0.00674013	0.0713185	-3.03377	NOT
ENSMUSG00000049723	1.26515	1.79956	2.87659	0.0108925	0.0961659	-3.03551	UP
ENSMUSG00000045287	-0.233759	9.03951	-3.48974	0.00299736	0.0420381	-3.03991	NOT
ENSMUSG00000034485	1.73578	-0.459498	2.70631	0.0154877	0.118255	-3.04209	UP
ENSMUSG00000031337	-0.39502	3.97557	-3.11394	0.00663059	0.0705566	-3.04289	NOT
ENSMUSG00000022742	-0.260701	5.67114	-3.30268	0.00445373	0.0545942	-3.04306	NOT
ENSMUSG00000043716	0.429541	6.22646	3.35422	0.00399381	0.0507779	-3.04572	NOT
ENSMUSG00000026872	-0.248904	7.55364	-3.43106	0.00339418	0.045171	-3.04575	NOT
ENSMUSG00000099145	1.11474	-1.01975	2.67623	0.0164737	0.122717	-3.04741	UP
ENSMUSG00000111424	-1.3656	-1.19524	-2.65849	0.0170831	0.125644	-3.04757	DOWN
ENSMUSG00000030468	-0.677269	3.05429	-2.99009	0.00859692	0.0833514	-3.04808	DOWN
ENSMUSG00000074102	-0.256828	6.09538	-3.33168	0.00418884	0.0522616	-3.05892	NOT
ENSMUSG00000053819	-0.256553	7.4757	-3.42083	0.00346856	0.0456586	-3.05906	NOT
ENSMUSG00000048728	-0.871949	0.822925	-2.76375	0.0137602	0.111121	-3.06001	DOWN
ENSMUSG00000028464	0.768205	0.394023	2.74528	0.0142941	0.113599	-3.06027	UP
ENSMUSG00000032000	-0.250544	5.45897	-3.27355	0.00473652	0.0569307	-3.06277	NOT
ENSMUSG00000045322	-0.624495	1.788	-2.84711	0.0115801	0.100773	-3.06321	DOWN
ENSMUSG00000020546	-0.401491	3.84031	-3.08695	0.00701751	0.0732109	-3.0633	NOT
ENSMUSG00000038205	-0.577806	2.63781	-2.93516	0.00964199	0.0898645	-3.0642	NOT
ENSMUSG00000033004	-0.276041	6.85653	-3.38372	0.00375206	0.0483626	-3.06457	NOT
ENSMUSG00000079383	-1.16449	-1.71802	-2.63033	0.0180954	0.128894	-3.06848	DOWN
ENSMUSG00000020572	0.303455	5.20939	3.2531	0.00494556	0.0584745	-3.06853	NOT
ENSMUSG00000048027	-0.202586	7.76314	-3.42992	0.00340239	0.045171	-3.06913	NOT
ENSMUSG00000023015	0.97209	2.52846	2.93398	0.00966573	0.0898649	-3.07446	UP
ENSMUSG00000075122	-0.358846	4.8819	-3.20501	0.00547367	0.0626015	-3.07851	NOT
ENSMUSG00000010358	0.316962	5.76852	3.29968	0.00448202	0.0547972	-3.07952	NOT
ENSMUSG00000021384	-0.284287	8.87914	-3.46506	0.00315831	0.0431297	-3.08153	NOT
ENSMUSG00000027651	-0.276562	5.77714	-3.29152	0.00456003	0.0552208	-3.08586	NOT
ENSMUSG00000055210	1.05396	-0.032874	2.70467	0.0155397	0.118523	-3.08724	UP
ENSMUSG00000035561	0.725991	1.56795	2.8255	0.0121107	0.103528	-3.08916	UP
ENSMUSG00000087259	-0.97667	2.46778	-2.89638	0.0104532	0.094186	-3.09	DOWN
ENSMUSG00000030159	0.984823	-0.059815	2.69979	0.0156965	0.119074	-3.09273	UP
ENSMUSG00000037999	0.509	4.07294	3.11493	0.00661692	0.0705016	-3.09316	NOT
ENSMUSG00000028063	0.641522	2.82409	2.95788	0.00919556	0.0871122	-3.09426	UP
ENSMUSG00000002332	0.28521	5.31455	3.24999	0.00497807	0.0587102	-3.09595	NOT
ENSMUSG00000039068	-0.230855	5.72345	-3.28201	0.00465254	0.0560685	-3.09668	NOT
ENSMUSG00000049985	1.44731	-0.911107	2.65296	0.0172774	0.126277	-3.09822	UP
ENSMUSG00000022797	-0.44317	3.80984	-3.06296	0.00737993	0.075794	-3.1026	NOT
ENSMUSG00000061393	-0.336586	5.45403	-3.25051	0.00497266	0.0586958	-3.10647	NOT
ENSMUSG00000046441	-0.337174	4.58218	-3.15736	0.00605183	0.0662957	-3.10866	NOT
ENSMUSG00000090223	0.942446	0.0709579	2.69832	0.0157437	0.119106	-3.10976	UP
ENSMUSG00000061894	-0.561878	3.67391	-3.03897	0.00776068	0.078002	-3.1113	NOT
ENSMUSG00000058546	0.582816	2.00462	2.85516	0.0113883	0.099539	-3.11406	NOT
ENSMUSG00000022240	-0.570061	2.85506	-2.93365	0.00967245	0.0898678	-3.11798	NOT
ENSMUSG00000010609	0.266234	4.64865	3.16932	0.00590122	0.0653096	-3.11838	NOT
ENSMUSG00000052631	0.754079	2.60862	2.92019	0.00994756	0.091634	-3.11908	UP
ENSMUSG00000002804	0.317939	4.09986	3.10394	0.00677146	0.0714486	-3.11972	NOT
ENSMUSG00000038422	-0.679346	1.02981	-2.74899	0.0141854	0.113378	-3.12122	DOWN
ENSMUSG00000021872	-0.94943	1.7135	-2.80379	0.0126676	0.106279	-3.12156	DOWN
ENSMUSG00000042472	-0.225295	5.98413	-3.29225	0.00455302	0.0552079	-3.1226	NOT
ENSMUSG00000070565	-0.377014	3.95107	-3.07206	0.00724038	0.0747696	-3.12472	NOT
ENSMUSG00000097787	-0.565651	1.81926	-2.816	0.0123513	0.104662	-3.12938	NOT
ENSMUSG00000024190	0.539905	3.65355	3.04213	0.00770954	0.077823	-3.13315	NOT
ENSMUSG00000014444	-0.283547	5.77926	-3.26852	0.00478709	0.0574738	-3.13342	NOT
ENSMUSG00000048930	-0.22501	5.66608	-3.25848	0.00488967	0.0581486	-3.13473	NOT
ENSMUSG00000038175	-0.336444	8.19513	-3.41555	0.00350757	0.0459294	-3.13555	NOT
ENSMUSG00000022901	-0.187568	8.6431	-3.43236	0.00338489	0.045171	-3.13563	NOT
ENSMUSG00000052302	-0.759895	1.14512	-2.74903	0.0141842	0.113378	-3.13806	DOWN
ENSMUSG00000029322	1.72828	-0.463046	2.65135	0.0173345	0.126323	-3.14142	UP
ENSMUSG00000044452	1.67927	-0.602674	2.64352	0.0176141	0.127147	-3.14214	UP
ENSMUSG00000113450	-0.554399	1.62816	-2.79089	0.0130102	0.107806	-3.14317	NOT
ENSMUSG00000027624	-0.571309	1.56372	-2.78183	0.0132559	0.108423	-3.14898	NOT
ENSMUSG00000064368	0.422848	4.48495	3.13637	0.00632514	0.0684336	-3.14969	NOT
ENSMUSG00000109016	-0.979078	-1.61494	-2.58625	0.0197959	0.136496	-3.15141	DOWN
ENSMUSG00000114355	-0.917631	-0.644862	-2.62197	0.0184067	0.130297	-3.15813	DOWN
ENSMUSG00000096221	-0.719353	1.33377	-2.75367	0.0140491	0.11261	-3.15991	DOWN
ENSMUSG00000105514	0.976506	-1.33567	2.59887	0.0192938	0.134457	-3.16013	UP
ENSMUSG00000104292	-0.865058	3.20054	-2.94634	0.00941969	0.0884579	-3.1605	DOWN
ENSMUSG00000003528	0.304084	5.85554	3.2671	0.00480141	0.057498	-3.16293	NOT
ENSMUSG00000052146	-0.749771	1.28753	-2.74701	0.0142433	0.113507	-3.16407	DOWN
ENSMUSG00000028018	-0.736519	1.65082	-2.78022	0.0133002	0.108595	-3.16469	DOWN
ENSMUSG00000040209	0.442325	3.76725	3.03985	0.00774638	0.0779142	-3.16572	NOT
ENSMUSG00000014769	0.242363	6.39767	3.30817	0.00440236	0.0542494	-3.16685	NOT
ENSMUSG00000104378	-0.742108	1.58627	-2.77165	0.0135376	0.109753	-3.16721	DOWN
ENSMUSG00000028053	-0.210833	6.44842	-3.30555	0.0044268	0.0543592	-3.17167	NOT
ENSMUSG00000003134	0.301783	6.46241	3.31091	0.00437694	0.0540054	-3.17168	NOT
ENSMUSG00000008348	-0.188132	9.09079	-3.42717	0.00342228	0.0452786	-3.17494	NOT
ENSMUSG00000025132	0.152363	9.14172	3.42844	0.00341308	0.0452419	-3.17745	NOT
ENSMUSG00000076431	-0.270374	7.97131	-3.38676	0.00372803	0.0482303	-3.17781	NOT
ENSMUSG00000115338	-0.284639	6.09367	-3.27342	0.00473779	0.0569307	-3.17881	NOT
ENSMUSG00000028476	-0.560834	2.01082	-2.80865	0.0125408	0.105515	-3.18111	NOT
ENSMUSG00000028980	-0.493386	6.74146	-3.31707	0.00432025	0.0535673	-3.18223	NOT
ENSMUSG00000021175	1.38297	-0.0941172	2.64952	0.0173996	0.126323	-3.18238	UP
ENSMUSG00000112095	0.816115	0.564419	2.69054	0.0159973	0.120503	-3.18526	UP
ENSMUSG00000020098	1.40188	-2.39536	2.54795	0.0213966	0.143576	-3.18745	UP
ENSMUSG00000064202	-0.732675	1.08678	-2.71476	0.0152208	0.117175	-3.19328	DOWN
ENSMUSG00000038910	-0.265341	8.17824	-3.38555	0.00373754	0.0483008	-3.19799	NOT
ENSMUSG00000029401	0.392558	3.39554	2.97334	0.00890325	0.0853874	-3.20239	NOT
ENSMUSG00000095597	1.13909	-2.70762	2.53092	0.0221467	0.146505	-3.20266	UP
ENSMUSG00000032359	0.241574	9.91047	3.43556	0.00336198	0.0449902	-3.20389	NOT
ENSMUSG00000074178	-0.685804	1.07342	-2.70836	0.0154225	0.11795	-3.20469	DOWN
ENSMUSG00000033009	-0.419508	3.79437	-3.01087	0.0082312	0.0812737	-3.20695	NOT
ENSMUSG00000030536	0.629321	4.07721	3.05951	0.00743355	0.0761341	-3.20784	UP
ENSMUSG00000070639	1.13605	2.21033	2.83006	0.011997	0.103066	-3.20923	UP
ENSMUSG00000098243	-0.564396	1.70984	-2.7628	0.0137871	0.111209	-3.21206	NOT
ENSMUSG00000059288	-0.288877	5.02118	-3.15645	0.00606336	0.0663183	-3.21332	NOT
ENSMUSG00000042541	0.264238	5.09899	3.17144	0.00587497	0.0653096	-3.21378	NOT
ENSMUSG00000020669	0.962864	0.469633	2.66833	0.0167425	0.123919	-3.21492	UP
ENSMUSG00000066258	0.306145	5.65583	3.22371	0.00526198	0.0609303	-3.21621	NOT
ENSMUSG00000101462	-0.859413	0.504482	-2.6569	0.017139	0.125869	-3.21656	DOWN
ENSMUSG00000034795	0.502601	2.49414	2.85622	0.0113633	0.0995068	-3.21663	NOT
ENSMUSG00000026603	0.551655	1.43904	2.74583	0.0142779	0.113535	-3.2173	NOT
ENSMUSG00000025791	0.261031	5.35847	3.19518	0.0055883	0.0633785	-3.21762	NOT
ENSMUSG00000015501	-1.02436	1.61214	-2.74273	0.0143695	0.113811	-3.21823	DOWN
ENSMUSG00000021453	-0.630605	4.88295	-3.13138	0.0063919	0.068937	-3.21902	DOWN
ENSMUSG00000030516	-0.277605	7.19193	-3.3286	0.00421618	0.0525559	-3.22087	NOT
ENSMUSG00000018459	-0.611613	3.85087	-3.00317	0.00836487	0.0817866	-3.22498	DOWN
ENSMUSG00000025868	0.214988	6.22677	3.26526	0.00482015	0.057673	-3.22879	NOT
ENSMUSG00000022546	-0.663289	1.31205	-2.71591	0.0151848	0.117027	-3.22911	DOWN
ENSMUSG00000083465	-0.854234	0.229549	-2.63142	0.018055	0.128762	-3.23016	DOWN
ENSMUSG00000021668	-0.344102	3.98193	-3.02253	0.00803268	0.0797833	-3.2338	NOT
ENSMUSG00000085213	-0.496407	2.04656	-2.78509	0.0131669	0.108181	-3.23577	NOT
ENSMUSG00000085939	0.732703	0.799306	2.67771	0.0164237	0.122596	-3.24255	UP
ENSMUSG00000025533	0.272086	5.22489	3.16958	0.00589806	0.0653096	-3.24377	NOT
ENSMUSG00000111312	0.893576	-1.06737	2.56171	0.0208078	0.140908	-3.2452	UP
ENSMUSG00000042354	0.280477	5.39127	3.18462	0.00571409	0.0642022	-3.24604	NOT
ENSMUSG00000052911	0.267629	5.71343	3.21239	0.00538914	0.0619389	-3.24987	NOT
ENSMUSG00000058006	-0.344265	3.83215	-2.99505	0.00850829	0.0826696	-3.24988	NOT
ENSMUSG00000034083	-0.274496	4.6453	-3.09571	0.00688954	0.0721445	-3.25261	NOT
ENSMUSG00000109539	-0.813949	1.92454	-2.75759	0.013936	0.111895	-3.25393	DOWN
ENSMUSG00000086690	0.731975	0.303397	2.63404	0.0179588	0.128509	-3.25447	UP
ENSMUSG00000098108	-0.733845	2.59821	-2.82943	0.0120125	0.103066	-3.25782	DOWN
ENSMUSG00000027364	-0.682535	1.02097	-2.67557	0.016496	0.122743	-3.25823	DOWN
ENSMUSG00000108709	-0.835424	0.829388	-2.65791	0.0171034	0.125727	-3.25894	DOWN
ENSMUSG00000103696	-0.671854	2.21977	-2.78819	0.0130829	0.108016	-3.25907	DOWN
ENSMUSG00000020142	-0.551724	3.5741	-2.95191	0.0093109	0.087967	-3.26064	NOT
ENSMUSG00000110575	-0.550068	1.70592	-2.73616	0.0145653	0.114896	-3.26196	NOT
ENSMUSG00000020100	-0.179433	9.4918	-3.39587	0.00365676	0.0474397	-3.26312	NOT
ENSMUSG00000027496	0.836463	1.55726	2.73331	0.0146511	0.11537	-3.26538	UP
ENSMUSG00000026069	0.603029	3.62683	2.97266	0.00891598	0.0853874	-3.26653	UP
ENSMUSG00000068747	-0.185545	8.70536	-3.37071	0.00385683	0.0494853	-3.26921	NOT
ENSMUSG00000054737	-0.450331	3.71543	-2.96568	0.00904689	0.0861699	-3.27525	NOT
ENSMUSG00000034652	-0.244607	7.83705	-3.33425	0.00416616	0.0520715	-3.27583	NOT
ENSMUSG00000028551	0.500063	3.00976	2.88854	0.0106251	0.0949419	-3.27641	NOT
ENSMUSG00000098091	1.11938	-3.39598	2.47129	0.0249773	0.157526	-3.2781	UP
ENSMUSG00000021706	-0.401876	4.69267	-3.08592	0.00703269	0.0732602	-3.27824	NOT
ENSMUSG00000031960	-0.204269	7.99875	-3.33878	0.00412639	0.0517768	-3.28141	NOT
ENSMUSG00000023050	0.459196	4.11318	3.02692	0.00795913	0.0793715	-3.2819	NOT
ENSMUSG00000051378	1.06259	-0.250044	2.58393	0.0198894	0.136804	-3.28292	UP
ENSMUSG00000097025	-0.577675	1.4693	-2.70142	0.0156439	0.118929	-3.28556	NOT
ENSMUSG00000050552	0.220149	5.31068	3.15546	0.00607601	0.0664048	-3.28922	NOT
ENSMUSG00000032534	0.29305	5.35813	3.15788	0.00604511	0.0662739	-3.29492	NOT
ENSMUSG00000025969	0.305017	5.87936	3.20465	0.0054778	0.0626015	-3.29654	NOT
ENSMUSG00000028458	0.302485	5.32518	3.15369	0.00609867	0.0666006	-3.29727	NOT
ENSMUSG00000051590	-0.610899	2.35272	-2.78414	0.0131927	0.108181	-3.29823	DOWN
ENSMUSG00000074863	-0.279057	4.05498	-2.99997	0.00842109	0.081889	-3.30098	NOT
ENSMUSG00000072235	-0.266457	6.13484	-3.21705	0.0053364	0.061487	-3.30353	NOT
ENSMUSG00000073555	1.04211	3.14131	2.8912	0.0105666	0.0947206	-3.30568	UP
ENSMUSG00000020361	0.254438	6.69208	3.25841	0.00489034	0.0581486	-3.31305	NOT
ENSMUSG00000064141	-0.306201	6.41707	-3.23405	0.00514845	0.0601617	-3.31324	NOT
ENSMUSG00000059824	0.514293	5.33491	3.14796	0.0061727	0.067304	-3.31346	NOT
ENSMUSG00000019876	0.44114	5.16707	3.13073	0.00640063	0.068937	-3.31411	NOT
ENSMUSG00000025577	-1.23329	1.06187	-2.6411	0.0177018	0.127713	-3.3158	DOWN
ENSMUSG00000025579	0.301176	8.41393	3.34038	0.00411244	0.0516766	-3.31601	NOT
ENSMUSG00000059022	-0.794499	2.15566	-2.74871	0.0141936	0.113379	-3.31789	DOWN
ENSMUSG00000039452	-1.25104	-0.0198945	-2.56322	0.0207441	0.140748	-3.31941	DOWN
ENSMUSG00000068180	0.971282	-0.559421	2.54531	0.0215111	0.144	-3.31976	UP
ENSMUSG00000024986	-0.164248	7.3916	-3.29204	0.00455501	0.0552079	-3.32104	NOT
ENSMUSG00000044167	-0.247967	5.4054	-3.14289	0.0062389	0.0678671	-3.32239	NOT
ENSMUSG00000035900	-0.388621	5.01998	-3.10122	0.00681026	0.0716893	-3.32263	NOT
ENSMUSG00000018340	-0.212815	6.37046	-3.22683	0.00522748	0.0607169	-3.32316	NOT
ENSMUSG00000026519	-0.213025	8.43786	-3.33515	0.00415824	0.0520188	-3.32443	NOT
ENSMUSG00000027995	0.239829	8.11012	3.32349	0.00426204	0.0529862	-3.32711	NOT
ENSMUSG00000028274	-0.216466	5.16503	-3.11688	0.0065898	0.0703732	-3.3276	NOT
ENSMUSG00000064341	0.366287	7.58194	3.3006	0.00447338	0.0547393	-3.32817	NOT
ENSMUSG00000112068	-1.03687	-2.17044	-2.46247	0.0254238	0.159094	-3.32934	DOWN
ENSMUSG00000021510	-0.376406	3.68876	-2.93685	0.00960804	0.0896857	-3.32962	NOT
ENSMUSG00000022610	-0.65437	1.84462	-2.71212	0.0153036	0.117425	-3.33081	DOWN
ENSMUSG00000039236	0.60939	2.41112	2.78758	0.0130993	0.108025	-3.33367	UP
ENSMUSG00000021356	-0.537861	2.67795	-2.80275	0.0126947	0.106351	-3.33609	NOT
ENSMUSG00000096992	-1.26975	-0.210567	-2.54032	0.0217296	0.144771	-3.33763	DOWN
ENSMUSG00000032508	-0.236348	6.62306	-3.23687	0.00511788	0.0599664	-3.33967	NOT
ENSMUSG00000094306	-1.18201	-2.22959	-2.4536	0.0258807	0.160876	-3.34023	DOWN
ENSMUSG00000033335	-0.200005	9.27421	-3.35247	0.00400857	0.0508733	-3.342	NOT
ENSMUSG00000058756	-0.61551	2.99008	-2.83385	0.0119029	0.102566	-3.34625	DOWN
ENSMUSG00000030393	-0.424984	2.91157	-2.82613	0.012095	0.103457	-3.35052	NOT
ENSMUSG00000031949	-0.526852	2.79906	-2.80827	0.0125507	0.105515	-3.35453	NOT
ENSMUSG00000058690	-0.394051	4.51383	-3.02587	0.00797674	0.0794329	-3.35836	NOT
ENSMUSG00000038252	0.410598	3.39983	2.89369	0.0105119	0.0943633	-3.36376	NOT
ENSMUSG00000031214	-0.192716	8.1015	-3.3035	0.004446	0.0545473	-3.36407	NOT
ENSMUSG00000045975	-0.353818	4.92389	-3.07099	0.00725665	0.0748145	-3.36498	NOT
ENSMUSG00000113776	-0.836293	0.56956	-2.57943	0.0200723	0.137859	-3.36801	DOWN
ENSMUSG00000114524	1.02694	-2.15856	2.44585	0.0262857	0.162099	-3.36864	UP
ENSMUSG00000044551	-0.546848	2.65895	-2.78376	0.0132032	0.108181	-3.36898	NOT
ENSMUSG00000040188	-0.15915	10.1341	-3.36141	0.0039335	0.050183	-3.36902	NOT
ENSMUSG00000036339	-0.246722	6.20377	-3.19089	0.00563911	0.0636661	-3.36987	NOT
ENSMUSG00000024104	0.303113	7.19587	3.26063	0.00486755	0.0580913	-3.37076	NOT
ENSMUSG00000109669	-0.409101	2.56479	-2.77383	0.0134768	0.109715	-3.37203	NOT
ENSMUSG00000040363	-0.340726	5.88789	-3.15961	0.00602315	0.0661367	-3.37727	NOT
ENSMUSG00000048330	-0.33311	4.70976	-3.04063	0.00773384	0.0778451	-3.37794	NOT
ENSMUSG00000027882	-0.273267	6.03121	-3.17068	0.00588432	0.0653096	-3.38154	NOT
ENSMUSG00000058672	-0.246814	6.71097	-3.22222	0.00527861	0.0610219	-3.38232	NOT
ENSMUSG00000010175	-0.468607	3.77227	-2.91838	0.00998528	0.091921	-3.38326	NOT
ENSMUSG00000033249	1.25536	-2.39972	2.42896	0.0271904	0.164665	-3.38399	UP
ENSMUSG00000003873	0.254793	6.02773	3.17457	0.00583639	0.0651064	-3.38403	NOT
ENSMUSG00000060594	-0.310154	3.8856	-2.9345	0.00965523	0.0898645	-3.38768	NOT
ENSMUSG00000050350	1.27185	-0.708921	2.4986	0.0236407	0.15229	-3.38884	UP
ENSMUSG00000040592	-0.300266	4.96222	-3.06269	0.00738411	0.075794	-3.39228	NOT
ENSMUSG00000094845	-1.07969	-1.33441	-2.4539	0.0258652	0.160851	-3.39427	DOWN
ENSMUSG00000031016	0.993495	1.0288	2.61639	0.0186172	0.131475	-3.39485	UP
ENSMUSG00000040722	-0.184065	8.21421	-3.2927	0.00454866	0.0552079	-3.396	NOT
ENSMUSG00000028793	-0.270437	6.3487	-3.1875	0.00567949	0.0640188	-3.39976	NOT
ENSMUSG00000063535	-0.519456	3.96853	-2.92992	0.00974795	0.0903895	-3.40681	NOT
ENSMUSG00000084329	-1.01762	-1.73872	-2.43001	0.0271332	0.16454	-3.40776	DOWN
ENSMUSG00000029319	0.222817	5.47135	3.11155	0.00666405	0.0706813	-3.41131	NOT
ENSMUSG00000108660	1.50744	-1.72632	2.43505	0.0268612	0.163917	-3.41489	UP
ENSMUSG00000056394	0.464544	3.7211	2.90981	0.0101649	0.0925895	-3.41591	NOT
ENSMUSG00000047180	-0.204306	6.83964	-3.21399	0.00537103	0.0617845	-3.41758	NOT
ENSMUSG00000051034	-0.437826	3.40298	-2.854	0.0114158	0.0995932	-3.41797	NOT
ENSMUSG00000037957	-0.260728	5.69191	-3.12314	0.00650361	0.0696064	-3.4182	NOT
ENSMUSG00000102703	-0.644278	0.867852	-2.57546	0.0202347	0.138567	-3.42156	DOWN
ENSMUSG00000045679	0.496013	2.45633	2.74623	0.0142663	0.113507	-3.42224	NOT
ENSMUSG00000089797	0.423535	3.33578	2.85521	0.011387	0.099539	-3.42326	NOT
ENSMUSG00000093930	0.298445	4.87944	3.04568	0.00765233	0.0775086	-3.42468	NOT
ENSMUSG00000091811	0.376736	4.27959	2.97581	0.00885753	0.0851185	-3.42607	NOT
ENSMUSG00000004364	-0.235162	6.24448	-3.16588	0.00594414	0.0655259	-3.42851	NOT
ENSMUSG00000030271	-0.362298	3.38047	-2.84682	0.011587	0.100773	-3.42939	NOT
ENSMUSG00000000056	-0.197484	6.86383	-3.20919	0.00542562	0.0622382	-3.43076	NOT
ENSMUSG00000020114	-0.189536	6.70605	-3.19729	0.00556346	0.0632709	-3.43447	NOT
ENSMUSG00000104443	-1.41292	-0.634375	-2.4609	0.0255042	0.159378	-3.43472	DOWN
ENSMUSG00000106933	-0.603914	1.00761	-2.58006	0.0200464	0.137749	-3.43549	DOWN
ENSMUSG00000056234	-0.235136	6.31791	-3.16828	0.00591414	0.0653822	-3.43555	NOT
ENSMUSG00000030219	-1.0425	-1.03491	-2.44262	0.0264567	0.162439	-3.4376	DOWN
ENSMUSG00000043263	0.789397	3.57606	2.88035	0.0108076	0.0956024	-3.43904	UP
ENSMUSG00000083674	-1.13336	-1.41333	-2.42315	0.0275081	0.165357	-3.43944	DOWN
ENSMUSG00000105031	0.661438	0.504856	2.54731	0.021424	0.143652	-3.43945	UP
ENSMUSG00000115249	-0.88621	0.387233	-2.52573	0.0223805	0.147148	-3.44007	DOWN
ENSMUSG00000029009	0.29155	5.96334	3.14216	0.00624856	0.0678671	-3.44032	NOT
ENSMUSG00000031816	0.308713	4.97318	3.048	0.00761518	0.0772043	-3.44069	NOT
ENSMUSG00000102344	-1.40814	-0.725677	-2.45238	0.0259442	0.161056	-3.44081	DOWN
ENSMUSG00000029649	0.210152	7.00214	3.2152	0.00535731	0.0616773	-3.4419	NOT
ENSMUSG00000021254	-0.231015	6.00011	-3.13902	0.00628993	0.0681603	-3.44268	NOT
ENSMUSG00000027331	1.53057	0.292431	2.53221	0.0220894	0.146264	-3.4432	UP
ENSMUSG00000045799	0.797705	-0.451288	2.48081	0.0245035	0.155841	-3.44366	UP
ENSMUSG00000054517	-0.323143	5.34352	-3.0761	0.00717919	0.0744542	-3.44488	NOT
ENSMUSG00000031059	0.329569	4.9472	3.04149	0.0077199	0.0778451	-3.44851	NOT
ENSMUSG00000085995	1.72298	-2.00496	2.4037	0.0285984	0.169271	-3.44895	UP
ENSMUSG00000039158	-0.177525	8.99132	-3.29348	0.00454115	0.0552079	-3.44897	NOT
ENSMUSG00000033685	0.381049	9.08555	3.29519	0.00452475	0.0550793	-3.45437	NOT
ENSMUSG00000087700	0.854538	-0.308413	2.4829	0.0244005	0.155398	-3.45573	UP
ENSMUSG00000032384	-0.35205	4.43684	-2.96843	0.00899506	0.0858513	-3.45851	NOT
ENSMUSG00000031767	-0.542325	4.78656	-3.00407	0.0083492	0.0816903	-3.45889	NOT
ENSMUSG00000048897	-0.184367	8.09978	-3.25775	0.00489724	0.0581486	-3.45936	NOT
ENSMUSG00000047419	-0.549893	3.2771	-2.81166	0.0124628	0.105238	-3.4623	NOT
ENSMUSG00000079083	-0.501003	4.24001	-2.93815	0.00958212	0.0895631	-3.46288	NOT
ENSMUSG00000056121	-0.209695	7.95311	-3.24828	0.00499609	0.0588731	-3.46603	NOT
ENSMUSG00000078202	-0.593514	2.08021	-2.66724	0.0167799	0.123999	-3.46713	DOWN
ENSMUSG00000053916	-0.841466	-1.02442	-2.42646	0.027327	0.165248	-3.46814	DOWN
ENSMUSG00000028926	0.3379	5.34064	3.07194	0.0072422	0.0747696	-3.46868	NOT
ENSMUSG00000065593	0.984363	-1.0392	2.43449	0.0268913	0.163969	-3.46869	UP
ENSMUSG00000024197	0.330114	4.36811	2.96378	0.00908283	0.0863948	-3.4716	NOT
ENSMUSG00000023800	1.10257	-0.463736	2.46499	0.0252952	0.158715	-3.47179	UP
ENSMUSG00000037353	-0.179717	6.7164	-3.17883	0.00578419	0.0647522	-3.47429	NOT
ENSMUSG00000009621	-0.279697	7.67545	-3.23121	0.00517935	0.0603326	-3.47478	NOT
ENSMUSG00000035476	-0.543215	3.35396	-2.81496	0.0123781	0.104728	-3.47597	NOT
ENSMUSG00000105655	-0.4608	1.99013	-2.65452	0.0172226	0.126074	-3.47605	NOT
ENSMUSG00000035139	-0.241774	5.08924	-3.03575	0.00781333	0.0783626	-3.47668	NOT
ENSMUSG00000101191	-1.06335	-2.74382	-2.35439	0.0315464	0.179746	-3.47777	DOWN
ENSMUSG00000033623	-0.324197	4.78217	-2.99992	0.0084221	0.081889	-3.47783	NOT
ENSMUSG00000027074	0.523426	2.5719	2.73166	0.0147009	0.115493	-3.47815	NOT
ENSMUSG00000022586	1.24223	-1.28746	2.41678	0.0278612	0.166751	-3.47859	UP
ENSMUSG00000055945	-1.42076	-1.17327	-2.40746	0.0283844	0.168372	-3.4803	DOWN
ENSMUSG00000021273	0.374682	3.5459	2.85006	0.0115094	0.100347	-3.48816	NOT
ENSMUSG00000016541	0.239055	7.02495	3.19274	0.00561709	0.0634686	-3.4914	NOT
ENSMUSG00000070709	-0.360592	4.22064	-2.92383	0.00987237	0.0913618	-3.49361	NOT
ENSMUSG00000040441	0.942241	-1.96385	2.37711	0.0301543	0.174622	-3.49408	UP
ENSMUSG00000056268	-0.364807	4.72433	-2.98395	0.00870812	0.0840865	-3.49541	NOT
ENSMUSG00000092981	1.04423	-1.549	2.39337	0.0291935	0.171143	-3.49682	UP
ENSMUSG00000030268	-0.923416	0.718667	-2.51618	0.0228169	0.149039	-3.50135	DOWN
ENSMUSG00000094185	1.01608	-2.85638	2.34196	0.0323329	0.182279	-3.50156	UP
ENSMUSG00000019088	0.440759	3.05669	2.7781	0.0133584	0.109007	-3.50433	NOT
ENSMUSG00000036769	-0.289067	5.91851	-3.10078	0.00681665	0.0717028	-3.50537	NOT
ENSMUSG00000031647	0.688394	1.59315	2.60842	0.0189224	0.133093	-3.5073	UP
ENSMUSG00000043162	0.548034	1.46696	2.59229	0.0195542	0.135563	-3.51247	NOT
ENSMUSG00000020654	0.430044	4.41848	2.94921	0.00936346	0.0882256	-3.51502	NOT
ENSMUSG00000024993	-0.191104	6.34081	-3.13069	0.00640118	0.068937	-3.51764	NOT
ENSMUSG00000079139	0.806046	-0.549498	2.43172	0.0270406	0.164347	-3.51965	UP
ENSMUSG00000082536	0.861564	-1.5666	2.377	0.0301609	0.174622	-3.52222	UP
ENSMUSG00000097378	0.779073	-0.671243	2.4229	0.0275222	0.165357	-3.52233	UP
ENSMUSG00000109203	-1.0387	0.573965	-2.49123	0.0239945	0.153791	-3.52304	DOWN
ENSMUSG00000029923	-0.619486	1.30047	-2.55756	0.0209837	0.141939	-3.52533	DOWN
ENSMUSG00000041870	0.175642	8.27675	3.23366	0.00515267	0.0601617	-3.52724	NOT
ENSMUSG00000001280	-0.344317	4.83859	-2.9812	0.00875834	0.0843517	-3.52741	NOT
ENSMUSG00000091985	-0.650681	2.23858	-2.65068	0.0173584	0.126323	-3.52902	DOWN
ENSMUSG00000037636	0.574296	1.90655	2.6289	0.0181484	0.129075	-3.52916	NOT
ENSMUSG00000036820	0.310565	5.80294	3.0838	0.00706417	0.0735335	-3.53157	NOT
ENSMUSG00000031451	0.188677	8.74565	3.24752	0.00500408	0.0589178	-3.532	NOT
ENSMUSG00000089742	-1.2312	-2.17271	-2.33592	0.032722	0.18292	-3.53425	DOWN
ENSMUSG00000075010	0.449299	3.58696	2.83232	0.0119408	0.102703	-3.5348	NOT
ENSMUSG00000022769	0.342567	7.47215	3.19495	0.00559102	0.0633785	-3.53676	NOT
ENSMUSG00000104034	-1.31231	-1.20687	-2.37295	0.0304048	0.175237	-3.53696	DOWN
ENSMUSG00000021600	-0.648329	1.54609	-2.57353	0.0203143	0.138886	-3.53815	DOWN
ENSMUSG00000097835	-0.369666	3.35246	-2.78709	0.0131128	0.108072	-3.53957	NOT
ENSMUSG00000037731	-0.172477	7.81512	-3.20548	0.00546826	0.0625946	-3.5429	NOT
ENSMUSG00000038126	-0.42383	3.79	-2.84048	0.0117404	0.101477	-3.54494	NOT
ENSMUSG00000030671	-0.165649	9.41307	-3.25863	0.00488815	0.0581486	-3.54583	NOT
ENSMUSG00000085471	-0.906596	0.455286	-2.47051	0.0250161	0.157541	-3.54836	DOWN
ENSMUSG00000097223	0.923806	-1.8679	2.34789	0.0319555	0.181413	-3.54862	UP
ENSMUSG00000117079	-0.576798	1.40216	-2.55445	0.0211163	0.142446	-3.54896	NOT
ENSMUSG00000105388	0.99687	-2.90188	2.31065	0.0343975	0.188259	-3.54896	UP
ENSMUSG00000109089	-0.562207	2.3212	-2.65121	0.0173396	0.126323	-3.549	NOT
ENSMUSG00000049076	-0.221872	7.48561	-3.18604	0.00569702	0.0641648	-3.55027	NOT
ENSMUSG00000049176	-1.04388	0.0629815	-2.43942	0.0266268	0.162958	-3.55173	DOWN
ENSMUSG00000099478	-0.515019	2.88668	-2.7173	0.0151415	0.116886	-3.55443	NOT
ENSMUSG00000025856	0.403683	4.26927	2.90822	0.0101988	0.0927293	-3.5598	NOT
ENSMUSG00000055865	-2.03606	-2.37866	-2.3079	0.0345847	0.188841	-3.56065	DOWN
ENSMUSG00000086742	-0.779718	-0.683075	-2.39027	0.0293744	0.171843	-3.56177	DOWN
ENSMUSG00000108095	-0.669347	0.362478	-2.45813	0.0256461	0.159701	-3.56249	DOWN
ENSMUSG00000032648	-0.681766	1.64913	-2.56941	0.0204849	0.139463	-3.56351	DOWN
ENSMUSG00000029064	0.175754	7.12769	3.16305	0.00597975	0.0657632	-3.56417	NOT
ENSMUSG00000026478	0.4854	3.78208	2.84365	0.0116635	0.101231	-3.56465	NOT
ENSMUSG00000015013	0.266054	4.66873	2.9523	0.00930333	0.0879547	-3.56539	NOT
ENSMUSG00000050192	0.463536	3.35571	2.78524	0.013163	0.108181	-3.56785	NOT
ENSMUSG00000038523	0.632809	1.22152	2.53864	0.0218036	0.145057	-3.56866	UP
ENSMUSG00000020580	-0.2028	7.25319	-3.16493	0.00595606	0.0656056	-3.56921	NOT
ENSMUSG00000023277	-0.165098	8.30845	-3.21203	0.00539329	0.0619389	-3.57147	NOT
ENSMUSG00000044345	0.513791	3.28399	2.77402	0.0134714	0.109715	-3.57214	NOT
ENSMUSG00000042594	-0.224492	8.58215	-3.22066	0.00529596	0.0610714	-3.57333	NOT
ENSMUSG00000043832	-0.250968	6.05658	-3.07948	0.00712841	0.0740372	-3.57385	NOT
ENSMUSG00000022075	-0.252619	5.20922	-3.00017	0.00841762	0.081889	-3.57401	NOT
ENSMUSG00000090207	-1.18004	-1.85895	-2.32239	0.0336092	0.185854	-3.57501	DOWN
ENSMUSG00000059493	-0.997758	-0.780621	-2.37477	0.0302947	0.175033	-3.57609	DOWN
ENSMUSG00000066170	0.979422	2.73386	2.7015	0.0156414	0.118929	-3.578	UP
ENSMUSG00000087088	-0.774977	0.668746	-2.47106	0.0249886	0.157526	-3.57864	DOWN
ENSMUSG00000031540	-0.216297	6.00111	-3.072	0.00724122	0.0747696	-3.58064	NOT
ENSMUSG00000020077	0.395901	6.33371	3.10425	0.00676707	0.0714486	-3.58077	NOT
ENSMUSG00000087221	-0.427415	2.81386	-2.69544	0.0158372	0.11962	-3.58138	NOT
ENSMUSG00000044783	-0.282333	6.35525	-3.09889	0.00684379	0.0718265	-3.583	NOT
ENSMUSG00000038473	-0.356737	4.88464	-2.95893	0.00917543	0.0870392	-3.58319	NOT
ENSMUSG00000027133	0.285536	4.362	2.90627	0.0102402	0.0929245	-3.58527	NOT
ENSMUSG00000031609	0.378494	4.40803	2.91177	0.0101236	0.0925579	-3.58698	NOT
ENSMUSG00000000531	1.02815	-0.856066	2.37537	0.0302584	0.174969	-3.58719	UP
ENSMUSG00000084052	-0.744864	0.122203	-2.42582	0.0273618	0.165332	-3.58824	DOWN
ENSMUSG00000029468	-0.154448	8.47114	-3.20888	0.00542924	0.0622382	-3.59051	NOT
ENSMUSG00000015468	-0.33056	5.41945	-3.01036	0.00824002	0.0813034	-3.5938	NOT
ENSMUSG00000006818	0.253545	4.74117	2.94642	0.00941814	0.0884579	-3.594	NOT
ENSMUSG00000039005	-0.228268	7.25697	-3.15294	0.00610831	0.0666538	-3.59406	NOT
ENSMUSG00000031847	-0.979128	0.374941	-2.43445	0.0268932	0.163969	-3.60067	DOWN
ENSMUSG00000025609	-0.205121	7.13689	-3.14233	0.00624633	0.0678671	-3.60254	NOT
ENSMUSG00000038518	-0.242755	5.82454	-3.04544	0.00765626	0.0775086	-3.60267	NOT
ENSMUSG00000003484	0.955108	1.72557	2.57206	0.0203752	0.139121	-3.60332	UP
ENSMUSG00000042787	-0.256474	5.52483	-3.01632	0.00813778	0.0806888	-3.60524	NOT
ENSMUSG00000059743	0.681941	1.05457	2.50325	0.0234199	0.151402	-3.60537	UP
ENSMUSG00000107000	-0.247894	5.1067	-2.97292	0.00891123	0.0853874	-3.60746	NOT
ENSMUSG00000034932	0.307502	4.07154	2.85633	0.0113606	0.0995068	-3.61191	NOT
ENSMUSG00000042246	-0.251262	5.79764	-3.03834	0.00777093	0.0780402	-3.61219	NOT
ENSMUSG00000030096	0.211971	7.51071	3.1566	0.00606148	0.0663183	-3.61892	NOT
ENSMUSG00000028073	0.319957	5.82697	3.04217	0.00770881	0.077823	-3.62147	NOT
ENSMUSG00000029344	-0.223247	8.94186	-3.20858	0.00543268	0.0622382	-3.62219	NOT
ENSMUSG00000053310	-1.38154	-1.46456	-2.30866	0.0345331	0.188707	-3.62339	DOWN
ENSMUSG00000037738	0.738645	0.593337	2.45258	0.0259335	0.161056	-3.62469	UP
ENSMUSG00000056069	-0.26171	9.68316	-3.22655	0.00523055	0.0607169	-3.6264	NOT
ENSMUSG00000026112	0.247293	6.23396	3.07227	0.00723713	0.0747696	-3.62902	NOT
ENSMUSG00000042087	1.29015	-2.38622	2.27765	0.0367065	0.19555	-3.62963	UP
ENSMUSG00000038332	-0.230529	7.97912	-3.16966	0.005897	0.0653096	-3.63114	NOT
ENSMUSG00000087006	0.446321	3.28557	2.74302	0.0143609	0.113807	-3.63213	NOT
ENSMUSG00000044627	0.282483	5.32647	2.98948	0.00860797	0.0833514	-3.63286	NOT
ENSMUSG00000042292	-0.243694	5.78033	-3.02658	0.00796491	0.0793715	-3.63324	NOT
ENSMUSG00000024778	-0.96315	0.102798	-2.39594	0.0290443	0.170625	-3.63403	DOWN
ENSMUSG00000109946	-0.811903	1.65474	-2.52925	0.0222217	0.146517	-3.63414	DOWN
ENSMUSG00000024592	-0.348808	3.69519	-2.78397	0.0131973	0.108181	-3.63562	NOT
ENSMUSG00000067786	-1.4573	-2.06838	-2.27386	0.0369808	0.196169	-3.63715	DOWN
ENSMUSG00000032060	1.11598	-0.393666	2.37457	0.0303069	0.175033	-3.6373	UP
ENSMUSG00000040462	0.182465	8.67112	3.19413	0.00560072	0.0633858	-3.63791	NOT
ENSMUSG00000030674	-0.454182	2.94026	-2.68113	0.016309	0.122065	-3.63937	NOT
ENSMUSG00000039474	-0.459739	3.8325	-2.79739	0.0128364	0.107182	-3.63967	NOT
ENSMUSG00000030279	-0.389209	4.19432	-2.84638	0.0115977	0.100804	-3.64052	NOT
ENSMUSG00000027330	0.659351	2.13254	2.59578	0.0194159	0.134938	-3.64071	UP
ENSMUSG00002074962	-0.892911	-0.351213	-2.36127	0.0311183	0.178031	-3.64341	DOWN
ENSMUSG00000023953	0.791118	2.2547	2.60903	0.018899	0.132995	-3.64346	UP
ENSMUSG00000039634	-0.415674	3.81961	-2.79515	0.0128959	0.107486	-3.64372	NOT
ENSMUSG00000045216	-0.176934	7.22849	-3.12755	0.00644351	0.0692331	-3.64403	NOT
ENSMUSG00000022091	1.41315	0.0527514	2.4006	0.0287757	0.169759	-3.64654	UP
ENSMUSG00000022773	-0.714663	1.23657	-2.48347	0.0243727	0.155291	-3.6471	DOWN
ENSMUSG00000071796	-0.429219	2.54404	-2.62836	0.0181681	0.12915	-3.64737	NOT
ENSMUSG00000031770	-0.245601	8.25531	-3.17066	0.00588458	0.0653096	-3.65206	NOT
ENSMUSG00000085672	-0.603461	0.897474	-2.45178	0.0259754	0.161107	-3.65248	DOWN
ENSMUSG00000041638	-0.201332	8.03373	-3.16172	0.00599641	0.0658947	-3.6527	NOT
ENSMUSG00000100629	-0.934419	0.752207	-2.43391	0.0269226	0.164006	-3.65546	DOWN
ENSMUSG00000054648	-0.250881	6.46655	-3.07168	0.00724608	0.0747696	-3.65688	NOT
ENSMUSG00000063052	-0.316672	4.74527	-2.90711	0.0102224	0.0928234	-3.65702	NOT
ENSMUSG00000103367	-0.273075	5.64358	-3.00147	0.00839481	0.0818508	-3.65768	NOT
ENSMUSG00000092417	-0.38127	3.60251	-2.7589	0.0138983	0.111657	-3.65979	NOT
ENSMUSG00000114584	-1.26053	-0.862205	-2.31717	0.0339574	0.187063	-3.66243	DOWN
ENSMUSG00000041035	0.294995	4.0141	2.82327	0.0121667	0.103817	-3.66289	NOT
ENSMUSG00000104913	0.699421	-0.605394	2.3444	0.0321774	0.181866	-3.66381	UP
ENSMUSG00000020893	0.816203	3.7927	2.79531	0.0128917	0.107486	-3.66447	UP
ENSMUSG00000026820	-0.297864	4.63365	-2.89023	0.0105878	0.0947791	-3.66578	NOT
ENSMUSG00000062683	0.361715	3.40808	2.74119	0.0144151	0.114107	-3.66602	NOT
ENSMUSG00000024530	0.554037	1.64298	2.52769	0.022292	0.146704	-3.66624	NOT
ENSMUSG00000111345	-0.672703	0.153984	-2.38357	0.0297691	0.17326	-3.66767	DOWN
ENSMUSG00000021932	0.359376	3.78928	2.79145	0.0129949	0.107806	-3.66807	NOT
ENSMUSG00000057835	-0.323218	4.05061	-2.81527	0.01237	0.104723	-3.66882	NOT
ENSMUSG00000027340	0.214771	7.65506	3.13829	0.00629957	0.0682097	-3.67089	NOT
ENSMUSG00000050299	0.653514	1.05345	2.46683	0.0252019	0.158272	-3.67123	UP
ENSMUSG00000041444	-0.454023	3.07462	-2.68127	0.0163044	0.122065	-3.67264	NOT
ENSMUSG00000027087	-0.270175	7.88988	-3.14504	0.00621083	0.0676671	-3.67352	NOT
ENSMUSG00000081096	-0.896457	0.102073	-2.37377	0.0303552	0.175167	-3.67416	DOWN
ENSMUSG00000078786	-0.45359	2.82637	-2.64819	0.017447	0.126462	-3.6748	NOT
ENSMUSG00000059183	0.30676	4.42205	2.86832	0.0110813	0.0975254	-3.67647	NOT
ENSMUSG00000038069	-0.251486	5.34656	-2.96337	0.00909075	0.0864114	-3.67738	NOT
ENSMUSG00000006301	0.252415	6.44646	3.0643	0.00735918	0.0757044	-3.67859	NOT
ENSMUSG00000044066	-0.224975	7.5595	-3.12682	0.00645343	0.0692336	-3.68005	NOT
ENSMUSG00000031979	-0.249063	5.80616	-3.00591	0.00831714	0.0816047	-3.68006	NOT
ENSMUSG00000033545	-0.192159	6.69019	-3.0769	0.00716712	0.0743841	-3.68037	NOT
ENSMUSG00000009092	0.798151	0.438034	2.40817	0.0283441	0.168204	-3.68162	UP
ENSMUSG00000061759	-0.347127	4.2226	-2.82995	0.0119996	0.103066	-3.68289	NOT
ENSMUSG00000075266	1.2559	-1.72342	2.27291	0.0370499	0.196259	-3.68347	UP
ENSMUSG00000070493	0.21614	5.17458	2.94829	0.00938142	0.0883193	-3.68446	NOT
ENSMUSG00000101970	-0.212371	5.53333	-2.9779	0.00881887	0.0848052	-3.68605	NOT
ENSMUSG00000047821	-0.7333	1.71927	-2.50796	0.0231988	0.150802	-3.68778	DOWN
ENSMUSG00000039294	-0.191222	7.91657	-3.13901	0.00629014	0.0681603	-3.68937	NOT
ENSMUSG00000046876	-0.409184	2.77696	-2.63521	0.0179158	0.128464	-3.69028	NOT
ENSMUSG00000029217	0.216807	6.63703	3.07163	0.00724696	0.0747696	-3.69085	NOT
ENSMUSG00000006378	1.1499	-1.37392	2.28551	0.0361433	0.194173	-3.69134	UP
ENSMUSG00000006931	0.375971	3.09163	2.68635	0.0161354	0.121154	-3.69154	NOT
ENSMUSG00000041037	-0.286384	5.03028	-2.92251	0.00989959	0.091389	-3.6918	NOT
ENSMUSG00000031903	-0.201657	10.0123	-3.20342	0.00549202	0.0626618	-3.69194	NOT
ENSMUSG00000106391	-1.05275	-0.509275	-2.32064	0.0337261	0.186258	-3.6936	DOWN
ENSMUSG00000073599	-0.363105	7.82034	-3.13142	0.00639133	0.068937	-3.69376	NOT
ENSMUSG00000020914	1.24583	2.34854	2.59326	0.0195157	0.135431	-3.69475	UP
ENSMUSG00000051343	0.191598	6.6378	3.06922	0.00728359	0.075037	-3.69555	NOT
ENSMUSG00000031563	-0.259658	5.62245	-2.98113	0.00875964	0.0843517	-3.69579	NOT
ENSMUSG00000025588	-0.68352	1.05564	-2.43928	0.0266343	0.162958	-3.69755	DOWN
ENSMUSG00000104060	-0.480329	3.51295	-2.72386	0.0149388	0.116088	-3.70023	NOT
ENSMUSG00000098789	-0.750768	-0.244341	-2.33657	0.03268	0.182859	-3.70069	DOWN
ENSMUSG00000036615	-0.220491	5.19258	-2.93571	0.00963095	0.0898397	-3.7023	NOT
ENSMUSG00000027999	0.291417	4.14097	2.81905	0.0122737	0.104412	-3.70392	NOT
ENSMUSG00000038497	0.215007	6.16253	3.02949	0.00791635	0.079148	-3.70431	NOT
ENSMUSG00000092260	-0.399502	2.89627	-2.6406	0.0177197	0.127777	-3.70781	NOT
ENSMUSG00000105304	-0.455241	3.17792	-2.67619	0.016475	0.122717	-3.7082	NOT
ENSMUSG00000024610	1.00888	7.42969	3.10947	0.00669323	0.0709371	-3.71086	UP
ENSMUSG00000030411	-0.580172	1.02569	-2.43071	0.0270954	0.164415	-3.711	NOT
ENSMUSG00000097445	-0.562892	0.964936	-2.42448	0.0274354	0.165332	-3.71302	NOT
ENSMUSG00000053560	0.331456	4.68584	2.88147	0.0107825	0.0956024	-3.71323	NOT
ENSMUSG00000024672	1.22218	1.25282	2.46363	0.0253647	0.158938	-3.71528	UP
ENSMUSG00000064061	-0.384652	4.19089	-2.80877	0.0125378	0.105515	-3.71572	NOT
ENSMUSG00000028995	-0.299103	5.26861	-2.93464	0.00965238	0.0898645	-3.71792	NOT
ENSMUSG00000020277	0.196755	7.96246	3.1282	0.00643477	0.0692331	-3.7197	NOT
ENSMUSG00000110030	0.649967	1.9884	2.53609	0.0219165	0.145325	-3.72237	UP
ENSMUSG00000030754	-0.177821	7.49935	-3.10261	0.0067905	0.0715351	-3.72446	NOT
ENSMUSG00000080797	-0.720698	1.93688	-2.51216	0.0230027	0.149973	-3.72483	DOWN
ENSMUSG00000024908	-0.293419	6.69161	-3.05378	0.00752353	0.0767192	-3.72565	NOT
ENSMUSG00000019261	-0.208602	8.10338	-3.1278	0.00644018	0.0692331	-3.7286	NOT
ENSMUSG00000042364	-0.153509	9.54026	-3.17365	0.00584766	0.0651349	-3.72918	NOT
ENSMUSG00000078921	1.14996	0.561172	2.39284	0.0292243	0.171246	-3.72964	UP
ENSMUSG00000011427	-0.256712	5.1823	-2.92027	0.00994595	0.091634	-3.73004	NOT
ENSMUSG00000028885	-0.427259	4.66912	-2.85905	0.0112966	0.0992334	-3.73044	NOT
ENSMUSG00000022174	0.225808	6.72066	3.05783	0.00745976	0.076291	-3.73065	NOT
ENSMUSG00000028445	-0.589002	1.25242	-2.44058	0.026565	0.162889	-3.73086	DOWN
ENSMUSG00000019992	1.46849	-2.27447	2.21799	0.0412503	0.209752	-3.73211	UP
ENSMUSG00000031633	0.214553	6.7026	3.05518	0.00750135	0.0765487	-3.73356	NOT
ENSMUSG00000024151	-0.211941	5.72056	-2.97103	0.00894648	0.0855187	-3.73587	NOT
ENSMUSG00000105866	-0.97434	-2.0633	-2.21376	0.0415917	0.210756	-3.73838	DOWN
ENSMUSG00000035929	0.750866	-0.137947	2.33047	0.0330769	0.184124	-3.74096	UP
ENSMUSG00000105449	-1.00574	0.0970098	-2.33321	0.0328978	0.183638	-3.74174	DOWN
ENSMUSG00000101450	0.995422	-1.74166	2.23524	0.0398852	0.20568	-3.74219	UP
ENSMUSG00000019768	-0.399598	3.37033	-2.68504	0.0161786	0.121413	-3.7425	NOT
ENSMUSG00000086944	-0.500906	1.85095	-2.4966	0.0237365	0.15273	-3.74284	NOT
ENSMUSG00000028414	-0.351887	4.49292	-2.83314	0.0119205	0.102605	-3.74288	NOT
ENSMUSG00000025873	-0.178989	6.78505	-3.05157	0.00755845	0.0769633	-3.74549	NOT
ENSMUSG00000084960	-0.422183	2.72122	-2.59875	0.0192986	0.134457	-3.74563	NOT
ENSMUSG00000000901	-0.47613	2.55574	-2.57665	0.020186	0.138369	-3.74605	NOT
ENSMUSG00000002799	0.289528	5.45981	2.94676	0.0094114	0.0884579	-3.74612	NOT
ENSMUSG00000042371	-0.484395	3.14607	-2.65047	0.0173657	0.126323	-3.74619	NOT
ENSMUSG00000028433	0.261959	4.98647	2.89756	0.0104276	0.0940165	-3.74771	NOT
ENSMUSG00000032058	-0.199931	6.92065	-3.0588	0.00744469	0.0761925	-3.74803	NOT
ENSMUSG00000029373	0.89481	1.32944	2.45118	0.0260064	0.161128	-3.7505	UP
ENSMUSG00000026799	-0.296845	4.05892	-2.77452	0.0134575	0.109687	-3.75229	NOT
ENSMUSG00000032198	0.403316	3.09607	2.65515	0.0172001	0.126057	-3.75315	NOT
ENSMUSG00000054676	0.195116	6.63158	3.04072	0.00773234	0.0778451	-3.75316	NOT
ENSMUSG00000030515	0.833412	1.04565	2.42107	0.0276229	0.165795	-3.75491	UP
ENSMUSG00000044934	0.414377	3.66096	2.73038	0.0147397	0.115557	-3.75521	NOT
ENSMUSG00000104966	-1.04203	0.376017	-2.34456	0.0321667	0.181866	-3.75789	DOWN
ENSMUSG00000029149	0.566073	1.32129	2.44473	0.0263451	0.162251	-3.75807	NOT
ENSMUSG00000040723	-0.167236	8.41237	-3.12545	0.00647209	0.0693381	-3.75852	NOT
ENSMUSG00000021831	0.332487	4.29171	2.81105	0.0124787	0.105261	-3.75863	NOT
ENSMUSG00000111844	-0.672864	1.27897	-2.4247	0.0274231	0.165332	-3.76195	DOWN
ENSMUSG00000109243	-0.866892	0.128363	-2.32562	0.0333956	0.185309	-3.76209	DOWN
ENSMUSG00000107624	-0.794119	-0.143638	-2.30625	0.0346973	0.189354	-3.76256	DOWN
ENSMUSG00000086491	-0.446665	2.83339	-2.60308	0.0191292	0.134009	-3.76342	NOT
ENSMUSG00000032305	-0.228806	5.89741	-2.97327	0.00890464	0.0853874	-3.76346	NOT
ENSMUSG00000105776	-1.13641	-1.23363	-2.23661	0.0397791	0.205235	-3.76385	DOWN
ENSMUSG00000037234	-0.277229	6.38885	-3.01311	0.00819273	0.0810652	-3.7639	NOT
ENSMUSG00000085095	-0.487876	2.71939	-2.58675	0.0197757	0.136438	-3.76589	NOT
ENSMUSG00000056215	0.724429	2.48118	2.57129	0.0204067	0.139211	-3.76602	UP
ENSMUSG00000029267	-0.242704	5.14613	-2.89869	0.0104032	0.0938563	-3.76612	NOT
ENSMUSG00000001700	0.608867	1.54077	2.46327	0.0253827	0.15898	-3.76628	UP
ENSMUSG00000030824	0.151537	9.0794	3.14377	0.00622744	0.0677954	-3.7673	NOT
ENSMUSG00000028397	-0.269569	5.32172	-2.91563	0.0100426	0.0920977	-3.76789	NOT
ENSMUSG00000043051	-0.372872	4.27801	-2.79318	0.0129486	0.107806	-3.76907	NOT
ENSMUSG00000085442	-0.603091	0.357734	-2.34091	0.0324004	0.182387	-3.76995	DOWN
ENSMUSG00000081451	-0.837024	-0.820375	-2.25841	0.0381182	0.200103	-3.77012	DOWN
ENSMUSG00000094955	0.948881	-1.72904	2.21731	0.0413049	0.20991	-3.7721	UP
ENSMUSG00000104342	1.10873	-2.50805	2.18122	0.044305	0.2185	-3.77377	UP
ENSMUSG00000069662	-0.238748	10.478	-3.17487	0.00583263	0.0651064	-3.7748	NOT
ENSMUSG00000072966	-0.260528	5.14688	-2.89391	0.0105071	0.0943633	-3.77515	NOT
ENSMUSG00000046572	-0.537808	2.77888	-2.58695	0.0197679	0.136438	-3.77609	NOT
ENSMUSG00000047959	0.463715	3.84138	2.7436	0.0143439	0.113736	-3.77771	NOT
ENSMUSG00000024273	-0.278529	4.23075	-2.78417	0.0131921	0.108181	-3.77826	NOT
ENSMUSG00000041390	0.767785	1.87384	2.49252	0.0239321	0.153602	-3.78021	UP
ENSMUSG00000038147	0.190937	8.59816	3.12281	0.00650806	0.0696064	-3.7804	NOT
ENSMUSG00000040782	-0.269665	4.8173	-2.85481	0.0113966	0.0995496	-3.78055	NOT
ENSMUSG00000010376	0.225891	5.68634	2.94994	0.00934917	0.0882085	-3.78179	NOT
ENSMUSG00000038690	0.229679	5.6674	2.94806	0.00938601	0.0883193	-3.78213	NOT
ENSMUSG00000029484	0.230464	9.32667	3.14178	0.0062535	0.0678682	-3.78567	NOT
ENSMUSG00000106229	-0.624171	1.23967	-2.40891	0.0283023	0.168177	-3.78635	DOWN
ENSMUSG00000097855	0.676742	1.17284	2.41405	0.0280131	0.167296	-3.7881	UP
ENSMUSG00000003345	0.199821	7.1759	3.05606	0.00748751	0.0765189	-3.79008	NOT
ENSMUSG00000031231	0.327457	4.43348	2.81161	0.0124642	0.105238	-3.79222	NOT
ENSMUSG00000020802	-0.338752	4.09821	-2.7556	0.0139932	0.112226	-3.79858	NOT
ENSMUSG00000049988	-0.306696	4.37058	-2.79029	0.0130262	0.107866	-3.79955	NOT
ENSMUSG00000089542	1.0212	-1.20688	2.22769	0.0404777	0.207513	-3.80115	UP
ENSMUSG00000037410	-0.302545	6.4707	-3.00053	0.00841122	0.081889	-3.80192	NOT
ENSMUSG00000001520	-0.811956	-0.0544627	-2.28883	0.0359081	0.193895	-3.80288	DOWN
ENSMUSG00000115049	-0.450189	2.17283	-2.50097	0.0235282	0.151774	-3.80315	NOT
ENSMUSG00000016763	-0.452841	3.86812	-2.71915	0.015084	0.116717	-3.80396	NOT
ENSMUSG00000087175	0.952652	-1.12889	2.23016	0.0402833	0.207123	-3.80422	UP
ENSMUSG00000029591	1.05664	-0.875017	2.24454	0.0391669	0.203424	-3.80612	UP
ENSMUSG00000056880	-0.798194	2.20122	-2.4962	0.0237556	0.152749	-3.80651	DOWN
ENSMUSG00000038650	0.153571	7.19196	3.04866	0.0076046	0.0771529	-3.80654	NOT
ENSMUSG00000075054	-0.305215	4.19065	-2.76298	0.0137819	0.111209	-3.80908	NOT
ENSMUSG00000048758	0.364839	4.58974	2.8222	0.0121939	0.103923	-3.80944	NOT
ENSMUSG00000089857	-0.378864	3.3963	-2.65343	0.017261	0.126277	-3.81089	NOT
ENSMUSG00000105950	-1.12826	-2.67116	-2.14132	0.0478552	0.22698	-3.81177	DOWN
ENSMUSG00000104571	-1.31896	-0.896001	-2.22417	0.0407562	0.208029	-3.81226	DOWN
ENSMUSG00000018387	-0.570499	3.04	-2.60157	0.0191884	0.134137	-3.81255	NOT
ENSMUSG00000102989	-1.07225	-1.40582	-2.19761	0.0429186	0.214604	-3.81312	DOWN
ENSMUSG00000024590	0.514845	2.8131	2.5844	0.0198705	0.136746	-3.81945	NOT
ENSMUSG00000107195	-0.949447	-1.34329	-2.19741	0.0429355	0.214604	-3.82113	DOWN
ENSMUSG00000070336	0.777946	-0.741669	2.24123	0.0394218	0.204041	-3.82426	UP
ENSMUSG00000025169	0.26726	4.38708	2.78916	0.0130566	0.10799	-3.82482	NOT
ENSMUSG00000037104	-0.431142	4.014	-2.72771	0.0148209	0.115734	-3.82528	NOT
ENSMUSG00000068739	0.216565	6.67211	3.00782	0.0082839	0.0814496	-3.82608	NOT
ENSMUSG00000024357	0.240942	6.28281	2.97888	0.00880094	0.0846909	-3.82739	NOT
ENSMUSG00000092482	-0.44016	2.14356	-2.48467	0.0243138	0.155128	-3.82838	NOT
ENSMUSG00000022621	0.32657	3.07298	2.61156	0.0188014	0.132442	-3.82957	NOT
ENSMUSG00000039959	0.726103	2.5144	2.54168	0.0216697	0.144617	-3.83009	UP
ENSMUSG00000103749	-0.686038	1.38752	-2.39789	0.0289316	0.170176	-3.8302	DOWN
ENSMUSG00000114354	-1.01054	-2.20114	-2.14827	0.0472188	0.225565	-3.83135	DOWN
ENSMUSG00000026358	0.417835	4.57045	2.80885	0.0125357	0.105515	-3.83202	NOT
ENSMUSG00000039683	0.383094	4.51912	2.80241	0.0127037	0.106351	-3.83222	NOT
ENSMUSG00000025574	0.635165	2.21421	2.50291	0.023436	0.151402	-3.83251	UP
ENSMUSG00000015806	0.272921	5.02388	2.85843	0.0113112	0.0992367	-3.83415	NOT
ENSMUSG00000057132	0.856356	1.31248	2.40198	0.0286968	0.169585	-3.83662	UP
ENSMUSG00000022099	-0.309215	3.63388	-2.6733	0.0165727	0.123053	-3.83856	NOT
ENSMUSG00000097633	-0.420554	1.96991	-2.45908	0.0255973	0.159592	-3.83907	NOT
ENSMUSG00000007035	-0.472992	2.20113	-2.48386	0.0243531	0.155291	-3.84027	NOT
ENSMUSG00000036580	-0.190827	7.2086	-3.03067	0.00789684	0.0790304	-3.84046	NOT
ENSMUSG00000028249	0.178336	9.00895	3.10633	0.00673759	0.0713185	-3.84052	NOT
ENSMUSG00000041431	1.11554	0.592292	2.33258	0.0329388	0.18372	-3.84077	UP
ENSMUSG00000032340	-0.512013	3.24862	-2.61466	0.0186832	0.131807	-3.84181	NOT
ENSMUSG00000097101	0.759879	0.505638	2.32246	0.0336045	0.185854	-3.84188	UP
ENSMUSG00000040152	0.594004	4.60176	2.80601	0.0126095	0.105855	-3.84687	UP
ENSMUSG00000035093	-0.211767	6.89258	-3.00806	0.00827973	0.0814496	-3.84792	NOT
ENSMUSG00000109739	-0.701964	0.89157	-2.33982	0.0324704	0.182476	-3.84878	DOWN
ENSMUSG00000071661	-0.659451	2.40319	-2.49966	0.0235904	0.152036	-3.84888	DOWN
ENSMUSG00000078931	0.767815	-0.402467	2.24834	0.0388772	0.202497	-3.84985	UP
ENSMUSG00000032436	-0.203865	7.70283	-3.05095	0.0075683	0.076972	-3.85039	NOT
ENSMUSG00000112096	-1.00088	-1.52439	-2.16894	0.0453707	0.22128	-3.85052	DOWN
ENSMUSG00000038732	-0.395863	3.07149	-2.58918	0.0196784	0.136088	-3.8513	NOT
ENSMUSG00000035578	0.938385	0.0592258	2.28188	0.0364023	0.194847	-3.85136	UP
ENSMUSG00000107102	-1.16815	-2.3489	-2.12803	0.0490945	0.230594	-3.85156	DOWN
ENSMUSG00000083902	-0.803616	-1.12158	-2.19006	0.0435522	0.21674	-3.85438	DOWN
ENSMUSG00000084350	-0.706571	1.45927	-2.38988	0.0293971	0.171904	-3.85507	DOWN
ENSMUSG00000104852	-0.984302	-0.217238	-2.2439	0.0392165	0.203429	-3.85755	DOWN
ENSMUSG00000062127	-0.184485	9.73177	-3.11589	0.00660357	0.0704129	-3.85846	NOT
ENSMUSG00000047832	-0.211441	5.65336	-2.90403	0.010288	0.0931507	-3.85854	NOT
ENSMUSG00000114094	-0.510511	2.00138	-2.44911	0.0261147	0.161471	-3.86101	NOT
ENSMUSG00000026836	-0.295091	5.53593	-2.88998	0.0105934	0.0947791	-3.86174	NOT
ENSMUSG00000034235	-0.388815	3.14018	-2.59205	0.0195638	0.135563	-3.86257	NOT
ENSMUSG00000020901	-0.224965	8.10019	-3.06222	0.00739147	0.075814	-3.86295	NOT
ENSMUSG00000069793	0.522764	2.92862	2.57686	0.0201775	0.138369	-3.86306	NOT
ENSMUSG00000052512	-0.333848	7.04422	-3.00845	0.00827298	0.0814496	-3.86348	NOT
ENSMUSG00000058298	-0.412709	4.10906	-2.72212	0.0149922	0.116391	-3.86428	NOT
ENSMUSG00000030431	0.73938	0.254027	2.28877	0.035913	0.193895	-3.86442	UP
ENSMUSG00000069874	-0.291183	6.99401	-3.00539	0.00832616	0.081636	-3.86471	NOT
ENSMUSG00000030677	0.7046	1.52029	2.40713	0.0284032	0.168412	-3.8656	UP
ENSMUSG00000055216	-1.06822	-1.00066	-2.18676	0.0438315	0.217312	-3.86658	DOWN
ENSMUSG00000024776	-0.233612	6.36413	-2.96084	0.00913882	0.0867766	-3.8676	NOT
ENSMUSG00000026986	-0.317062	5.75526	-2.90569	0.0102526	0.0929762	-3.87124	NOT
ENSMUSG00000106149	-0.625529	1.16426	-2.35319	0.0316214	0.180079	-3.87196	DOWN
ENSMUSG00000038007	-1.40062	-0.415325	-2.21299	0.0416538	0.210995	-3.87667	DOWN
ENSMUSG00000046985	-0.248253	6.16826	-2.94022	0.00954066	0.0892947	-3.87737	NOT
ENSMUSG00000073792	-0.385011	4.23139	-2.73134	0.0147105	0.115493	-3.87775	NOT
ENSMUSG00000006057	0.244115	4.94431	2.82641	0.0120879	0.103457	-3.88046	NOT
ENSMUSG00000050229	-0.266643	4.9298	-2.81654	0.0123377	0.104646	-3.8827	NOT
ENSMUSG00000049300	-0.264667	4.28263	-2.73781	0.0145157	0.11458	-3.88339	NOT
ENSMUSG00000084012	0.980817	-2.24799	2.12124	0.0497388	0.232297	-3.88427	UP
ENSMUSG00000047635	-0.254534	4.77623	-2.79825	0.0128135	0.107054	-3.88428	NOT
ENSMUSG00000041849	-0.244267	5.69613	-2.89363	0.0105132	0.0943633	-3.88674	NOT
ENSMUSG00000002728	0.271179	5.27993	2.85866	0.0113058	0.0992367	-3.88736	NOT
ENSMUSG00000037465	-0.393309	4.49302	-2.75915	0.0138913	0.111657	-3.88794	NOT
ENSMUSG00000074570	-0.470546	5.21448	-2.84085	0.0117314	0.101477	-3.88821	NOT
ENSMUSG00000054263	-0.384811	6.67118	-2.97094	0.008948	0.0855187	-3.88921	NOT
ENSMUSG00000005699	-0.53721	2.71737	-2.52023	0.0226306	0.148304	-3.89005	NOT
ENSMUSG00000032643	-0.724217	-0.645646	-2.19819	0.0428706	0.214549	-3.89022	DOWN
ENSMUSG00000025372	0.565651	2.86041	2.55179	0.0212306	0.142942	-3.89326	NOT
ENSMUSG00000027300	-0.387559	4.31545	-2.73311	0.0146569	0.11537	-3.89491	NOT
ENSMUSG00000097748	-0.789747	-0.627354	-2.19327	0.0432814	0.21596	-3.89896	DOWN
ENSMUSG00000067336	-0.365311	4.16909	-2.71248	0.0152924	0.117425	-3.89924	NOT
ENSMUSG00000086782	0.557315	0.877295	2.32233	0.0336132	0.185854	-3.89957	NOT
ENSMUSG00000087365	-0.637599	-0.298033	-2.21598	0.0414125	0.210304	-3.90033	DOWN
ENSMUSG00000004677	0.241811	7.26815	3.00701	0.008298	0.0815311	-3.90099	NOT
ENSMUSG00000061032	0.16118	7.45385	3.01601	0.00814317	0.0806888	-3.90146	NOT
ENSMUSG00000111090	-1.08048	-1.48589	-2.13721	0.0482354	0.228012	-3.90268	DOWN
ENSMUSG00000060019	0.735404	-0.836913	2.18657	0.043848	0.217317	-3.90455	UP
ENSMUSG00000006169	0.207573	7.75374	3.02894	0.00792553	0.079148	-3.90483	NOT
ENSMUSG00000117399	-0.882824	-1.11576	-2.15687	0.0464415	0.223529	-3.90725	DOWN
ENSMUSG00000089762	0.73592	0.167021	2.25659	0.038254	0.200472	-3.90752	UP
ENSMUSG00000023266	-0.34245	3.09526	-2.56263	0.0207687	0.140779	-3.90942	NOT
ENSMUSG00000028291	-0.170265	6.39574	-2.94346	0.00947655	0.0888241	-3.90949	NOT
ENSMUSG00000056055	1.35579	-0.637497	2.19787	0.0428971	0.214577	-3.91033	UP
ENSMUSG00000115518	-1.12846	-1.8955	-2.10943	0.0508786	0.23589	-3.9118	NOT
ENSMUSG00000056708	-0.249703	7.81308	-3.0251	0.00798951	0.0795036	-3.91317	NOT
ENSMUSG00000038023	-0.267257	8.57771	-3.05554	0.00749577	0.0765475	-3.91337	NOT
ENSMUSG00000000301	0.908218	-0.935531	2.1753	0.0448159	0.219397	-3.91378	UP
ENSMUSG00000034248	-0.259197	5.78039	-2.88713	0.0106564	0.0950977	-3.91493	NOT
ENSMUSG00000109110	-0.492155	0.700684	-2.28675	0.0360553	0.193998	-3.91628	NOT
ENSMUSG00000038042	-0.352739	3.56052	-2.62182	0.0184122	0.130297	-3.91681	NOT
ENSMUSG00000025094	-0.428212	2.89408	-2.5305	0.0221657	0.146517	-3.91745	NOT
ENSMUSG00000101678	-0.833138	-1.69736	-2.1176	0.0500883	0.233285	-3.91892	NOT
ENSMUSG00000021701	0.976363	0.51695	2.28028	0.0365172	0.195078	-3.91904	UP
ENSMUSG00000105378	0.80755	-0.0825845	2.2306	0.0402483	0.207019	-3.91943	UP
ENSMUSG00000040565	-0.236551	6.47098	-2.9434	0.00947769	0.0888241	-3.91965	NOT
ENSMUSG00000030960	-0.32487	3.53318	-2.61698	0.0185949	0.131383	-3.91992	NOT
ENSMUSG00000048677	0.339449	5.24536	2.83771	0.0118082	0.101875	-3.92333	NOT
ENSMUSG00000071669	-0.312052	6.95143	-2.97325	0.00890505	0.0853874	-3.9242	NOT
ENSMUSG00000032536	0.228757	6.10336	2.91584	0.0100381	0.0920977	-3.92543	NOT
ENSMUSG00000042197	-0.200939	5.91847	-2.8954	0.0104746	0.0942169	-3.92548	NOT
ENSMUSG00000003379	1.81215	-2.16993	2.0981	0.0519944	0.238581	-3.92771	NOT
ENSMUSG00000027272	-0.250381	5.71433	-2.87368	0.0109585	0.0966266	-3.93014	NOT
ENSMUSG00000110615	-0.535523	0.816761	-2.28839	0.0359393	0.193895	-3.93072	NOT
ENSMUSG00000062545	0.244255	6.40852	2.93748	0.00959546	0.089628	-3.93123	NOT
ENSMUSG00000027720	0.99325	-2.90335	2.06021	0.0558897	0.248989	-3.9329	NOT
ENSMUSG00000040189	0.701888	0.191074	2.24323	0.0392675	0.203543	-3.93349	UP
ENSMUSG00000029551	-0.349372	4.13132	-2.68969	0.0160252	0.120585	-3.93419	NOT
ENSMUSG00000008393	0.313494	4.11929	2.69954	0.0157045	0.119074	-3.93435	NOT
ENSMUSG00000032594	-0.170366	7.90982	-3.01948	0.00808416	0.0802175	-3.93452	NOT
ENSMUSG00000044807	-0.465556	3.13881	-2.55287	0.0211842	0.142698	-3.93452	NOT
ENSMUSG00000045757	-0.262806	4.39274	-2.72573	0.0148812	0.115776	-3.93461	NOT
ENSMUSG00000020059	0.936874	-2.48586	2.07701	0.0541307	0.243503	-3.93497	NOT
ENSMUSG00000021365	1.32795	0.853905	2.30137	0.0350324	0.190914	-3.93767	UP
ENSMUSG00000027589	-0.213406	6.25722	-2.91779	0.0099974	0.0919721	-3.93823	NOT
ENSMUSG00000038886	0.227929	8.09954	3.02688	0.0079599	0.0793715	-3.93971	NOT
ENSMUSG00000027661	-0.981412	1.53231	-2.34613	0.0320669	0.181752	-3.94012	DOWN
ENSMUSG00000037991	1.03673	-1.64717	2.11655	0.0501888	0.23362	-3.94031	NOT
ENSMUSG00000031176	0.285335	5.19279	2.82259	0.0121841	0.103902	-3.94179	NOT
ENSMUSG00000011832	-0.348273	4.53831	-2.73806	0.0145084	0.11458	-3.94253	NOT
ENSMUSG00000047246	-0.539404	3.56254	-2.60427	0.0190828	0.133953	-3.94272	NOT
ENSMUSG00000021123	-1.03384	0.535232	-2.25164	0.0386267	0.201597	-3.94283	DOWN
ENSMUSG00000060147	0.33492	3.68894	2.63677	0.017859	0.128242	-3.94324	NOT
ENSMUSG00000018559	0.305429	4.13094	2.69443	0.01587	0.119803	-3.94724	NOT
ENSMUSG00000043671	-0.525776	4.37989	-2.71085	0.0153437	0.117604	-3.94795	NOT
ENSMUSG00000022139	-0.168277	7.47399	-2.99195	0.00856359	0.0831493	-3.94856	NOT
ENSMUSG00000021917	0.219451	6.26299	2.9171	0.0100119	0.0920454	-3.94906	NOT
ENSMUSG00000031142	-1.01467	-0.383007	-2.17645	0.0447163	0.219124	-3.94931	DOWN
ENSMUSG00000063268	0.262638	6.121	2.90538	0.0102592	0.0929762	-3.94999	NOT
ENSMUSG00000054814	-0.451834	3.82733	-2.63697	0.0178515	0.128242	-3.95163	NOT
ENSMUSG00000033276	-0.845214	1.09493	-2.29685	0.0353461	0.192043	-3.95283	DOWN
ENSMUSG00000034429	-0.269685	4.08058	-2.67573	0.0164905	0.122743	-3.9529	NOT
ENSMUSG00000083856	1.21794	-1.19381	2.13492	0.0484489	0.228556	-3.95405	UP
ENSMUSG00000033720	-0.680401	0.837066	-2.27519	0.0368842	0.195975	-3.95411	DOWN
ENSMUSG00000042302	-0.394784	2.65045	-2.47917	0.0245843	0.155872	-3.95449	NOT
ENSMUSG00000083307	0.808687	0.315646	2.23995	0.0395201	0.204399	-3.95795	UP
ENSMUSG00000093739	0.903067	-1.49586	2.11374	0.0504606	0.234374	-3.95796	NOT
ENSMUSG00000117775	-0.379342	3.2405	-2.55487	0.0210982	0.142446	-3.95972	NOT
ENSMUSG00000026670	0.208534	6.00621	2.89026	0.0105872	0.0947791	-3.95998	NOT
ENSMUSG00000074500	-0.584244	2.46932	-2.44962	0.0260879	0.16138	-3.96059	NOT
ENSMUSG00000078495	-0.453796	3.79744	-2.62734	0.0182061	0.129354	-3.96278	NOT
ENSMUSG00000037204	-0.22916	5.59764	-2.84552	0.0116185	0.100921	-3.9648	NOT
ENSMUSG00000108699	-1.05743	-0.169358	-2.18175	0.0442596	0.218429	-3.96486	DOWN
ENSMUSG00000110148	-0.804057	0.0523073	-2.2014	0.042604	0.213951	-3.9654	DOWN
ENSMUSG00000041420	0.259901	5.97463	2.88469	0.0107105	0.0950977	-3.96632	NOT
ENSMUSG00000106607	-0.898678	-1.45026	-2.0994	0.0518656	0.238571	-3.96848	NOT
ENSMUSG00000027799	-0.447809	4.11124	-2.66749	0.0167712	0.123999	-3.96945	NOT
ENSMUSG00000098041	1.2427	-1.52363	2.10438	0.0513737	0.237087	-3.97131	NOT
ENSMUSG00000105004	-0.615263	1.29516	-2.31044	0.034412	0.188265	-3.97144	DOWN
ENSMUSG00000059975	-0.433806	4.2251	-2.68023	0.0163392	0.122226	-3.97187	NOT
ENSMUSG00000022184	-0.250499	4.55636	-2.72733	0.0148324	0.115734	-3.97236	NOT
ENSMUSG00000003380	0.217965	7.45967	2.98112	0.00875967	0.0843517	-3.97368	NOT
ENSMUSG00000023147	-0.201621	5.76392	-2.85689	0.0113474	0.0994917	-3.97461	NOT
ENSMUSG00000111966	0.643495	-0.741741	2.14737	0.0473004	0.225691	-3.97813	UP
ENSMUSG00000068115	-0.37812	4.58563	-2.72571	0.0148821	0.115776	-3.97885	NOT
ENSMUSG00000097418	0.917072	-2.51745	2.04631	0.0573843	0.252417	-3.97916	NOT
ENSMUSG00000045045	1.04769	-0.0558504	2.19725	0.0429483	0.214604	-3.98047	UP
ENSMUSG00000022843	-0.565905	2.71612	-2.46877	0.025104	0.15794	-3.98258	NOT
ENSMUSG00000041716	-0.46624	1.20068	-2.29626	0.0353873	0.192175	-3.98287	NOT
ENSMUSG00000042606	-0.499302	2.38444	-2.42811	0.0272366	0.164783	-3.98366	NOT
ENSMUSG00000026856	-0.228953	6.14763	-2.88537	0.0106954	0.0950977	-3.98506	NOT
ENSMUSG00000027454	0.504153	1.81244	2.37108	0.030518	0.175529	-3.98702	NOT
ENSMUSG00000037902	-0.148336	12.3057	-3.11383	0.00663215	0.0705566	-3.9876	NOT
ENSMUSG00000104280	-0.939627	-1.22459	-2.09966	0.0518392	0.238528	-3.98776	NOT
ENSMUSG00000080242	2.63344	0.157555	2.20892	0.0419853	0.212214	-3.98842	UP
ENSMUSG00000034243	-0.310805	5.31138	-2.80303	0.0126874	0.106351	-3.98962	NOT
ENSMUSG00000037461	0.253448	5.10654	2.78765	0.0130975	0.108025	-3.99294	NOT
[truncated: 12,013 more rows]
