# Supplementary material for: Distinct microglia alternative splicing in Alzheimer's disease
Source: Aging (Albany NY). 2022 Aug 23;14(16):6554–66. doi: 10.18632/aging.204223 (PMC9467408; doi:10.18632/aging.204223)
Supplement: Supplementary Table 3 [file aging-14-204223-s003.xlsx]

## Sheet: Supplementary Table 3
Supplementary Table 3. Dysregulated transcripts between APP and Ntg groups.
Transcript	logFC	AveExpr	t	P.Value	adj.P.Val	B	change
ENSMUST00000089200.3	5.54068	6.16363	20.1232	3.56712e-12	1.17052e-07	17.4832	UP
ENSMUST00000036267.8	2.44838	4.87312	15.4119	1.56783e-10	1.97246e-06	14.1258	UP
ENSMUST00000168401.2	3.85567	5.9441	14.519	3.60662e-10	1.97246e-06	13.606	UP
ENSMUST00000022875.7	3.0362	6.89141	14.1022	5.40428e-10	2.28336e-06	13.3502	UP
ENSMUST00000174064.9	3.25661	9.00811	13.912	6.52228e-10	2.28336e-06	13.0739	UP
ENSMUST00000134004.3	3.10642	4.14177	14.5634	3.4566e-10	1.97246e-06	13.0441	UP
ENSMUST00000034745.9	1.81116	5.9058	13.5415	9.4684e-10	2.28336e-06	12.7574	UP
ENSMUST00000195589.6	3.32542	5.20005	13.6455	8.52051e-10	2.28336e-06	12.6744	UP
ENSMUST00000174355.8	3.18863	10.811	13.106	1.48409e-09	3.24659e-06	11.9842	UP
ENSMUST00000033049.9	3.37794	2.52281	14.555	3.48449e-10	1.97246e-06	11.7861	UP
ENSMUST00000002677.11	3.35361	6.62206	12.2326	3.80322e-09	6.40986e-06	11.4254	UP
ENSMUST00000000696.7	1.50173	6.10082	12.1805	4.02955e-09	6.40986e-06	11.3661	UP
ENSMUST00000076046.7	1.10468	6.11407	12.1645	4.10213e-09	6.40986e-06	11.3492	UP
ENSMUST00000151120.9	0.520437	14.0381	12.9009	1.84225e-09	3.35842e-06	11.0543	NOT
ENSMUST00000015712.15	3.6086	4.62116	12.08	4.50835e-09	6.72441e-06	10.9961	UP
ENSMUST00000080882.11	2.89482	5.15966	11.8696	5.7171e-09	7.94883e-06	10.9355	UP
ENSMUST00000026972.8	1.6014	5.03675	11.8328	5.96223e-09	7.94883e-06	10.9105	UP
ENSMUST00000071044.13	1.61595	5.86478	11.5231	8.5188e-09	9.86689e-06	10.6278	UP
ENSMUST00000039516.4	3.708	1.70621	14.0406	5.74225e-10	2.28336e-06	10.5759	UP
ENSMUST00000225540.2	0.743145	10.2391	11.7566	6.50445e-09	8.20912e-06	10.506	UP
ENSMUST00000207982.2	0.92834	9.66087	11.5996	7.79419e-09	9.47254e-06	10.4059	UP
ENSMUST00000029046.9	5.45436	1.24588	15.1283	2.03313e-10	1.97246e-06	10.3236	UP
ENSMUST00000064664.10	4.69319	1.89225	13.5834	9.07339e-10	2.28336e-06	10.2959	UP
ENSMUST00000184581.3	3.37392	3.30548	11.8191	6.05598e-09	7.94883e-06	10.2608	UP
ENSMUST00000114071.8	2.38641	3.31422	11.5031	8.72005e-09	9.86689e-06	10.0444	UP
ENSMUST00000026613.14	0.892648	8.63858	11.0716	1.45386e-08	1.49084e-05	9.89847	UP
ENSMUST00000097648.6	1.75914	5.00227	10.8157	1.98373e-08	1.85983e-05	9.76421	UP
ENSMUST00000073350.13	4.81656	1.16325	13.8104	7.21765e-10	2.28336e-06	9.74627	UP
ENSMUST00000092836.6	3.9891	1.20516	13.5135	9.74191e-10	2.28336e-06	9.74519	UP
ENSMUST00000021668.10	0.772195	8.63787	10.9425	1.69941e-08	1.64013e-05	9.73776	UP
ENSMUST00000072634.15	1.0944	7.11213	10.5846	2.63952e-08	2.20431e-05	9.44638	UP
ENSMUST00000046515.15	1.70105	5.17155	10.4019	3.32014e-08	2.47607e-05	9.28086	UP
ENSMUST00000045702.6	2.55578	3.28304	10.6795	2.34624e-08	2.0808e-05	9.1916	UP
ENSMUST00000019071.4	1.45653	6.99822	10.3639	3.48338e-08	2.54008e-05	9.17466	UP
ENSMUST00000218123.2	3.52598	0.861318	12.948	1.7526e-09	3.35842e-06	9.16618	UP
ENSMUST00000050562.6	4.7398	2.82948	11.0148	1.55687e-08	1.5481e-05	9.07266	UP
ENSMUST00000034834.16	0.777168	8.89304	10.4092	3.28957e-08	2.47607e-05	9.01986	UP
ENSMUST00000219696.2	3.58199	3.19393	10.4865	2.98437e-08	2.38851e-05	8.88514	UP
ENSMUST00000102476.5	0.748513	10.2838	10.4636	3.0715e-08	2.39972e-05	8.87526	UP
ENSMUST00000038191.8	2.66046	1.59427	11.4099	9.72494e-09	1.06371e-05	8.8559	UP
ENSMUST00000029266.14	1.27215	5.83484	10.0185	5.42729e-08	3.71023e-05	8.79987	UP
ENSMUST00000238267.2	1.11776	7.53428	10.0659	5.10345e-08	3.56307e-05	8.73328	UP
ENSMUST00000018918.12	0.451237	10.2526	10.328	3.64567e-08	2.60063e-05	8.70414	NOT
ENSMUST00000218753.2	3.3905	1.73889	11.1167	1.37716e-08	1.45775e-05	8.65473	UP
ENSMUST00000013842.12	0.699825	7.90433	9.92471	6.13421e-08	4.02576e-05	8.50371	UP
ENSMUST00000026407.9	1.03861	8.36015	9.92998	6.09201e-08	4.02576e-05	8.4526	UP
ENSMUST00000048302.13	1.39073	3.94636	9.78176	7.40494e-08	4.76443e-05	8.39004	UP
ENSMUST00000032194.11	5.08816	2.43573	10.5703	2.68703e-08	2.20431e-05	8.37353	UP
ENSMUST00000027507.9	1.77848	4.89428	9.67606	8.52237e-08	5.17876e-05	8.35677	UP
ENSMUST00000044491.13	4.20554	-0.0721453	13.0208	1.62296e-09	3.32849e-06	8.3001	UP
ENSMUST00000001008.6	2.51196	5.01478	9.6286	9.08085e-08	5.23184e-05	8.29576	UP
ENSMUST00000057145.7	1.49486	4.80585	9.62801	9.08804e-08	5.23184e-05	8.29214	UP
ENSMUST00000219029.2	4.1927	1.84957	10.6028	2.58055e-08	2.20431e-05	8.19125	UP
ENSMUST00000043148.13	0.692942	5.67412	9.4995	1.08052e-07	6.0095e-05	8.12098	UP
ENSMUST00000033053.8	2.97264	4.6563	9.44048	1.17058e-07	6.38332e-05	8.02444	UP
ENSMUST00000047206.7	2.01339	3.22397	9.58485	9.63006e-08	5.44829e-05	7.97261	UP
ENSMUST00000034478.3	1.19934	6.42327	9.29212	1.43387e-07	7.46839e-05	7.78807	UP
ENSMUST00000027697.12	2.28509	2.24027	9.75815	7.64036e-08	4.79585e-05	7.78104	UP
ENSMUST00000138145.2	1.62487	6.21692	9.26532	1.48777e-07	7.62809e-05	7.76949	UP
ENSMUST00000170388.6	-0.530736	11.5532	-9.7478	7.74609e-08	4.79585e-05	7.69164	NOT
ENSMUST00000043722.10	1.4292	8.67941	9.40893	1.22195e-07	6.46727e-05	7.68778	UP
ENSMUST00000162053.8	1.61465	5.06822	9.13753	1.77587e-07	8.44544e-05	7.64619	UP
ENSMUST00000037099.9	1.84361	4.12792	9.15237	1.73959e-07	8.39453e-05	7.61706	UP
ENSMUST00000002284.11	1.42893	4.97903	9.07908	1.92678e-07	8.90497e-05	7.56655	UP
ENSMUST00000029766.9	3.94092	0.606022	10.7166	2.241e-08	2.04267e-05	7.4857	UP
ENSMUST00000026196.14	1.0137	5.45247	9.02365	2.08247e-07	9.49085e-05	7.47842	UP
ENSMUST00000117095.8	0.739458	8.59954	9.21261	1.60012e-07	8.07787e-05	7.42077	UP
ENSMUST00000105229.9	1.09166	6.23189	8.94732	2.3189e-07	0.000104236	7.31818	UP
ENSMUST00000006523.12	3.28543	1.72313	9.62926	9.07291e-08	5.23184e-05	7.30042	UP
ENSMUST00000016400.9	0.510377	11.1721	9.43046	1.18664e-07	6.38332e-05	7.29634	NOT
ENSMUST00000107926.8	2.50671	2.7494	9.11091	1.84298e-07	8.63938e-05	7.25022	UP
ENSMUST00000155282.9	2.7691	1.96604	9.15819	1.72557e-07	8.39453e-05	6.9768	UP
ENSMUST00000156623.8	1.49222	6.33154	8.67051	3.44395e-07	0.000141262	6.91022	UP
ENSMUST00000009728.13	0.800116	8.15239	8.8032	2.84609e-07	0.000122875	6.88736	UP
ENSMUST00000026328.11	1.04686	5.42834	8.60625	3.7799e-07	0.000147999	6.88679	UP
ENSMUST00000120243.8	3.35442	2.76699	8.8376	2.70968e-07	0.000118554	6.88563	UP
ENSMUST00000036928.12	1.02148	5.24267	8.59201	3.85892e-07	0.000147999	6.87586	UP
ENSMUST00000025563.8	0.688162	9.91672	8.91143	2.43973e-07	0.000108186	6.77219	UP
ENSMUST00000239257.2	0.51442	7.78173	8.67728	3.41046e-07	0.000141262	6.75281	NOT
ENSMUST00000092163.9	1.63028	9.33983	8.7941	2.88334e-07	0.000122875	6.69378	UP
ENSMUST00000070478.4	1.43599	7.82664	8.62305	3.68889e-07	0.000147619	6.66368	UP
ENSMUST00000022587.10	2.24108	2.93826	8.57268	3.96902e-07	0.000147999	6.64435	UP
ENSMUST00000021530.8	0.786262	7.65994	8.57653	3.94682e-07	0.000147999	6.61658	UP
ENSMUST00000116304.3	0.298621	12.6339	9.15803	1.72595e-07	8.39453e-05	6.59477	NOT
ENSMUST00000105579.8	0.740915	7.50126	8.53423	4.19794e-07	0.000153057	6.574	UP
ENSMUST00000167646.9	3.61561	3.19597	8.48441	4.5154e-07	0.000162822	6.53907	UP
ENSMUST00000025075.3	1.87579	2.08858	8.57495	3.9559e-07	0.000147999	6.39378	UP
ENSMUST00000086353.11	1.17501	3.64022	8.26814	6.21781e-07	0.00021477	6.37315	UP
ENSMUST00000093271.8	-0.481398	10.181	-8.65763	3.5087e-07	0.000142141	6.36629	NOT
ENSMUST00000091288.13	2.7409	2.12294	8.54842	4.11185e-07	0.000151603	6.34421	UP
ENSMUST00000146468.4	2.06138	2.38985	8.44641	4.7746e-07	0.000170297	6.33667	UP
ENSMUST00000016571.8	1.15075	4.30758	8.17454	7.15359e-07	0.000232414	6.28502	UP
ENSMUST00000027467.11	0.574257	10.0874	8.59123	3.86328e-07	0.000147999	6.26261	NOT
ENSMUST00000098105.4	2.78142	2.26861	8.43269	4.87199e-07	0.000171903	6.2532	UP
ENSMUST00000021201.6	0.828214	6.35207	8.20909	6.79199e-07	0.000227421	6.21725	UP
ENSMUST00000038665.6	2.26961	2.91677	8.22006	6.68122e-07	0.000226282	6.17736	UP
ENSMUST00000027368.6	0.528252	8.49376	8.31236	5.82144e-07	0.000203218	6.09868	NOT
ENSMUST00000014743.10	1.4766	5.54006	8.05061	8.62689e-07	0.000275567	6.05622	UP
ENSMUST00000053640.5	-0.451359	8.78296	-8.19833	6.90243e-07	0.000228784	5.89355	NOT
ENSMUST00000026221.7	0.760657	7.21802	8.04886	8.64977e-07	0.000275567	5.86727	UP
ENSMUST00000121390.8	2.1235	2.52789	8.02335	8.99191e-07	0.000283564	5.8292	UP
ENSMUST00000031617.13	0.592804	6.47674	7.93719	1.02566e-06	0.000314543	5.78477	UP
ENSMUST00000109084.8	0.974795	7.31723	7.9719	9.72603e-07	0.000301085	5.73298	UP
ENSMUST00000113587.8	1.00981	3.63451	7.81226	1.24335e-06	0.00036428	5.72329	UP
ENSMUST00000070000.6	1.92307	2.6342	7.86503	1.14599e-06	0.00034819	5.6441	UP
ENSMUST00000033015.8	1.40215	4.90264	7.72425	1.42558e-06	0.000413973	5.60004	UP
ENSMUST00000191465.2	3.54475	0.247579	8.69833	3.30843e-07	0.000139183	5.57977	UP
ENSMUST00000007757.15	-0.416616	10.7075	-8.18785	7.01186e-07	0.000230087	5.54303	NOT
ENSMUST00000026902.9	1.03357	4.78424	7.67381	1.54249e-06	0.00043085	5.52744	UP
ENSMUST00000038169.8	1.08899	5.43114	7.68859	1.50722e-06	0.000430068	5.50417	UP
ENSMUST00000166518.8	0.823422	5.745	7.70272	1.4743e-06	0.000424365	5.49591	UP
ENSMUST00000032892.7	2.4031	1.49861	8.01741	9.07364e-07	0.000283564	5.47073	UP
ENSMUST00000003575.11	0.756998	5.64365	7.66311	1.56857e-06	0.00043253	5.4437	UP
ENSMUST00000042844.7	1.41138	3.81704	7.59904	1.73473e-06	0.000466586	5.41898	UP
ENSMUST00000165855.8	1.69648	1.83469	7.83492	1.20052e-06	0.000354898	5.38699	UP
ENSMUST00000006235.9	0.650378	11.7972	8.21928	6.68903e-07	0.000226282	5.35036	UP
ENSMUST00000075072.6	1.53818	3.98505	7.54938	1.87622e-06	0.00048862	5.34945	UP
ENSMUST00000151624.2	1.07408	5.55218	7.55745	1.8524e-06	0.00048862	5.28559	UP
ENSMUST00000190724.2	0.578424	6.65702	7.62067	1.67665e-06	0.000458481	5.26158	NOT
ENSMUST00000004646.13	0.5134	7.14912	7.60913	1.70736e-06	0.00046302	5.17953	NOT
ENSMUST00000020843.13	1.90766	3.0185	7.4228	2.29453e-06	0.000574753	5.08543	UP
ENSMUST00000189793.7	0.703194	6.9522	7.535	1.91939e-06	0.000495927	5.0844	UP
ENSMUST00000168747.3	3.12728	1.12742	7.84657	1.17911e-06	0.000351739	5.08232	UP
ENSMUST00000021726.8	0.876464	5.23418	7.40707	2.35301e-06	0.000584937	5.07547	UP
ENSMUST00000105578.2	0.814248	6.0114	7.42982	2.26896e-06	0.000574753	5.03066	UP
ENSMUST00000034756.15	3.95469	1.66225	7.67098	1.54935e-06	0.00043085	5.01992	UP
ENSMUST00000155287.2	1.20078	3.13095	7.33787	2.62939e-06	0.000634418	4.97652	UP
ENSMUST00000000608.8	0.439884	8.39036	7.55135	1.87036e-06	0.00048862	4.90543	NOT
ENSMUST00000187117.2	0.658527	6.38868	7.3464	2.59358e-06	0.000630414	4.84951	UP
ENSMUST00000030455.15	0.498556	8.41757	7.51485	1.98169e-06	0.000508026	4.84074	NOT
ENSMUST00000155707.3	1.08059	6.51252	7.32092	2.70216e-06	0.000647216	4.79113	UP
ENSMUST00000080492.7	0.828615	5.11082	7.2221	3.17076e-06	0.000741303	4.7885	UP
ENSMUST00000109085.8	0.996496	7.33154	7.38099	2.45342e-06	0.000605313	4.77918	UP
ENSMUST00000024791.15	0.410884	10.4289	7.68225	1.52224e-06	0.000430611	4.76828	NOT
ENSMUST00000213254.2	1.03447	5.22396	7.19784	3.29837e-06	0.000746433	4.73873	UP
ENSMUST00000061156.10	0.721611	5.37359	7.20271	3.27236e-06	0.000745688	4.73147	UP
ENSMUST00000177637.2	-0.626002	12.4948	-7.85844	1.1577e-06	0.000348521	4.65168	DOWN
ENSMUST00000019074.4	1.91227	4.6042	7.09589	3.89655e-06	0.000846764	4.62715	UP
ENSMUST00000077636.8	0.568767	6.43602	7.21062	3.23052e-06	0.000741303	4.61995	NOT
ENSMUST00000163845.4	-0.300357	10.2344	-7.56129	1.84121e-06	0.00048862	4.61994	NOT
ENSMUST00000176683.8	0.986434	5.01988	7.10681	3.82737e-06	0.000837276	4.60901	UP
ENSMUST00000000287.9	0.479009	7.43032	7.2818	2.87833e-06	0.000684416	4.60353	NOT
ENSMUST00000088086.4	2.49474	3.46243	7.03385	4.31545e-06	0.000913595	4.53302	UP
ENSMUST00000085909.9	0.814556	7.24978	7.21839	3.18995e-06	0.000741303	4.52128	UP
ENSMUST00000003509.10	1.45324	5.07147	7.04962	4.20471e-06	0.000901786	4.51279	UP
ENSMUST00000229619.2	1.17864	4.54429	7.00543	4.52288e-06	0.000939328	4.48036	UP
ENSMUST00000032667.10	-0.554845	6.61675	-7.12474	3.71657e-06	0.000824024	4.47004	NOT
ENSMUST00000008812.9	0.856217	5.58184	7.05182	4.18949e-06	0.000901786	4.45993	UP
ENSMUST00000047419.8	0.877443	5.45295	7.04081	4.26616e-06	0.000909026	4.45624	UP
ENSMUST00000048209.16	0.59258	7.86055	7.23194	3.12048e-06	0.000736658	4.45588	UP
ENSMUST00000034713.9	3.76865	3.25005	6.96193	4.86085e-06	0.000990709	4.38987	UP
ENSMUST00000150290.9	2.05218	0.734389	7.35888	2.54207e-06	0.000622504	4.36842	UP
ENSMUST00000086075.13	0.566376	6.16171	7.02906	4.34967e-06	0.000914936	4.35209	NOT
ENSMUST00000055071.9	2.99565	3.20325	6.87854	5.58489e-06	0.00111746	4.26976	UP
ENSMUST00000103093.10	0.289972	10.8968	7.42406	2.28994e-06	0.000574753	4.25213	NOT
ENSMUST00000042610.15	2.58333	2.62417	6.89388	5.44372e-06	0.00110266	4.23821	UP
ENSMUST00000034276.13	0.578076	6.87277	7.01759	4.43283e-06	0.00092649	4.23786	NOT
ENSMUST00000040154.10	0.551315	6.29994	6.97139	4.7851e-06	0.000981364	4.2372	NOT
ENSMUST00000152441.2	0.866024	4.06277	6.74123	7.03407e-06	0.00137246	4.07132	UP
ENSMUST00000114233.3	1.34273	2.75402	6.73834	7.06848e-06	0.00137246	4.02551	UP
ENSMUST00000107409.5	0.671515	5.1203	6.73478	7.11117e-06	0.00137262	3.98002	UP
ENSMUST00000042167.10	1.49595	4.50994	6.68864	7.68918e-06	0.00145007	3.96078	UP
ENSMUST00000046290.3	-0.375941	10.2035	-7.16177	3.49819e-06	0.000786229	3.95806	NOT
ENSMUST00000035007.10	-0.494431	10.6932	-7.21389	3.21336e-06	0.000741303	3.95637	NOT
ENSMUST00000129534.2	1.66545	1.32446	6.86784	5.68573e-06	0.00113074	3.93754	UP
ENSMUST00000058488.9	0.469314	7.08811	6.84803	5.87736e-06	0.00116181	3.91885	NOT
ENSMUST00000026917.10	0.512692	7.60186	6.88661	5.51011e-06	0.00110926	3.90893	NOT
ENSMUST00000020188.13	-0.374462	10.2008	-7.11887	3.75246e-06	0.000826398	3.88542	NOT
ENSMUST00000015667.9	0.422965	8.74093	6.97362	4.7675e-06	0.000981364	3.87897	NOT
ENSMUST00000095739.10	-0.351592	10.8056	-7.13297	3.66679e-06	0.000818516	3.79254	NOT
ENSMUST00000034015.11	0.640768	5.33664	6.63459	8.42926e-06	0.00157158	3.78469	UP
ENSMUST00000031281.14	2.02765	1.79903	6.66256	8.03739e-06	0.00150708	3.75888	UP
ENSMUST00000026050.8	0.84789	4.74965	6.5658	9.4807e-06	0.00171396	3.73085	UP
ENSMUST00000012028.14	0.427453	7.65982	6.77928	6.59682e-06	0.00129622	3.71549	NOT
ENSMUST00000106562.3	2.81818	1.2361	6.69305	7.63178e-06	0.00144757	3.64519	UP
ENSMUST00000129785.2	2.13829	1.78659	6.56423	9.50631e-06	0.00171396	3.60922	UP
ENSMUST00000033598.9	1.08889	3.24977	6.45302	1.15119e-05	0.00197776	3.60236	UP
ENSMUST00000082402.1	0.549519	7.97076	6.71818	7.31364e-06	0.00140345	3.55957	NOT
ENSMUST00000119833.8	1.02159	3.44629	6.41976	1.21942e-05	0.0020602	3.55065	UP
ENSMUST00000028332.8	1.05935	6.15024	6.55834	9.60269e-06	0.00172187	3.54673	UP
ENSMUST00000115351.10	1.19978	2.78935	6.42482	1.20876e-05	0.00205515	3.53397	UP
ENSMUST00000153664.2	0.551332	5.6771	6.50681	1.04916e-05	0.00186093	3.5215	NOT
ENSMUST00000089430.6	0.992798	5.69037	6.49431	1.07199e-05	0.00188503	3.4972	UP
ENSMUST00000172306.3	-0.392532	8.47582	-6.69764	7.5726e-06	0.00144469	3.45784	NOT
ENSMUST00000102782.4	0.782863	5.04409	6.41746	1.22429e-05	0.0020602	3.44435	UP
ENSMUST00000184842.2	0.629523	6.31652	6.5125	1.03893e-05	0.0018528	3.44416	UP
ENSMUST00000137828.2	2.10842	1.42025	6.4874	1.08484e-05	0.0018935	3.41546	UP
ENSMUST00000081848.13	0.721937	4.4867	6.35962	1.35374e-05	0.00219991	3.40218	UP
ENSMUST00000162096.8	2.45112	0.778932	6.58977	9.09949e-06	0.00165884	3.38113	UP
ENSMUST00000085614.6	0.509779	6.26762	6.4649	1.12779e-05	0.00195806	3.36805	NOT
ENSMUST00000025511.11	0.741466	6.26988	6.45658	1.14412e-05	0.00197596	3.35183	UP
ENSMUST00000027137.11	-0.501673	8.4194	-6.60766	8.82559e-06	0.00161789	3.31124	NOT
ENSMUST00000025542.10	1.47124	3.8154	6.27702	1.56398e-05	0.00247518	3.30495	UP
ENSMUST00000031588.12	0.649072	4.4406	6.30045	1.50107e-05	0.00240274	3.30433	UP
ENSMUST00000090031.12	0.558082	6.13876	6.38566	1.29377e-05	0.00215502	3.24604	NOT
ENSMUST00000015484.10	2.04072	4.19789	6.23002	1.69855e-05	0.00265411	3.20689	UP
ENSMUST00000199675.2	-0.348311	9.3552	-6.62953	8.50226e-06	0.00157623	3.18744	NOT
ENSMUST00000080322.8	2.17044	3.91904	6.20034	1.78974e-05	0.00273157	3.1724	UP
ENSMUST00000174259.8	0.539913	6.52805	6.36912	1.33154e-05	0.00218466	3.16138	NOT
ENSMUST00000091354.12	0.464426	6.7231	6.37797	1.3112e-05	0.00216736	3.1493	NOT
ENSMUST00000000756.6	0.661039	8.0692	6.4931	1.07424e-05	0.00188503	3.14584	UP
ENSMUST00000109249.9	1.41851	2.1824	6.20853	1.76409e-05	0.00271769	3.13121	UP
ENSMUST00000063042.11	0.58032	7.05818	6.39613	1.27045e-05	0.00212697	3.13107	NOT
ENSMUST00000114873.8	1.65899	2.95708	6.16414	1.90791e-05	0.0028673	3.1171	UP
ENSMUST00000151361.2	0.465085	6.59564	6.34329	1.39283e-05	0.00225144	3.10623	NOT
ENSMUST00000110461.8	0.901895	4.85116	6.20904	1.76249e-05	0.00271769	3.10244	UP
ENSMUST00000119827.8	1.41091	1.99039	6.20349	1.77982e-05	0.00272911	3.0988	UP
ENSMUST00000109087.8	1.27753	7.04722	6.37657	1.31439e-05	0.00216736	3.09608	UP
ENSMUST00000192414.2	2.14279	1.22165	6.28946	1.53025e-05	0.00243755	3.07854	UP
ENSMUST00000026565.7	2.04482	4.03924	6.14716	1.96614e-05	0.00291931	3.07389	UP
ENSMUST00000123531.8	1.68935	2.3229	6.13721	2.00109e-05	0.00294457	3.0316	UP
ENSMUST00000110865.2	0.783523	4.68407	6.15352	1.94413e-05	0.00289975	3.02351	UP
ENSMUST00000144064.5	2.38706	3.29647	6.07431	2.23773e-05	0.00324906	2.97181	UP
ENSMUST00000001802.10	0.369826	8.64995	6.43211	1.19361e-05	0.00203995	2.94403	NOT
ENSMUST00000044579.12	1.011	5.77275	6.17614	1.86786e-05	0.00282892	2.92369	UP
ENSMUST00000179436.2	0.982797	3.23269	6.04365	2.3635e-05	0.00335739	2.91985	UP
ENSMUST00000030047.3	1.71055	3.32959	6.01814	2.47374e-05	0.00345669	2.87599	UP
ENSMUST00000221108.2	1.05207	2.1398	6.0515	2.33061e-05	0.00333537	2.87531	UP
ENSMUST00000100377.12	-0.396688	7.47759	-6.27247	1.5765e-05	0.00247518	2.86039	NOT
ENSMUST00000081840.6	0.952607	6.1051	6.16245	1.91363e-05	0.0028673	2.8513	UP
ENSMUST00000178136.8	-0.439792	8.38262	-6.33397	1.41568e-05	0.00227716	2.82739	NOT
ENSMUST00000026585.14	1.37372	2.16242	6.01773	2.47554e-05	0.00345669	2.82355	UP
ENSMUST00000216867.2	0.692605	4.89486	6.04976	2.33783e-05	0.00333537	2.81533	UP
ENSMUST00000075062.5	1.01404	3.15054	5.96036	2.74374e-05	0.00373581	2.77815	UP
ENSMUST00000108430.10	0.900085	4.30023	5.97198	2.68706e-05	0.00368926	2.74206	UP
ENSMUST00000239005.2	1.97771	1.18465	6.061	2.29145e-05	0.00331241	2.7328	UP
ENSMUST00000200998.4	0.687477	6.62319	6.11382	2.08587e-05	0.00305561	2.68769	UP
ENSMUST00000045356.9	0.818686	4.15415	5.91523	2.97592e-05	0.00394925	2.65486	UP
ENSMUST00000102483.5	0.78094	5.49897	6.00379	2.5381e-05	0.00351414	2.652	UP
ENSMUST00000114547.8	0.766766	6.28898	6.05777	2.30466e-05	0.00331689	2.63528	UP
ENSMUST00000085835.8	1.29644	2.16579	5.88778	3.12709e-05	0.00403985	2.61248	UP
ENSMUST00000112362.3	1.98171	1.01549	6.00017	2.55461e-05	0.00352214	2.60524	UP
ENSMUST00000001507.5	0.801111	4.58994	5.90617	3.02496e-05	0.00395462	2.5946	UP
ENSMUST00000113195.8	1.27904	4.03344	5.86587	3.25345e-05	0.00413564	2.57779	UP
ENSMUST00000066401.7	0.456846	12.2521	6.6144	8.72463e-06	0.00160837	2.5627	NOT
ENSMUST00000086519.12	0.462944	7.31587	6.10204	2.13001e-05	0.00310641	2.56222	NOT
ENSMUST00000229336.2	0.803923	4.52555	5.86339	3.2681e-05	0.00413564	2.52513	UP
ENSMUST00000143780.9	0.532552	6.86243	6.04046	2.37698e-05	0.003362	2.51894	NOT
ENSMUST00000205460.2	2.63982	-0.718066	6.27468	1.5704e-05	0.00247518	2.50221	UP
ENSMUST00000098242.4	0.658286	5.44344	5.91349	2.9853e-05	0.00394925	2.4964	UP
ENSMUST00000223200.2	0.803225	5.89608	5.94911	2.79978e-05	0.00378075	2.49534	UP
ENSMUST00000217356.2	0.660037	5.55855	5.91102	2.9986e-05	0.00394925	2.47538	UP
ENSMUST00000208125.2	0.796944	3.56255	5.79065	3.72942e-05	0.00456371	2.47482	UP
ENSMUST00000084434.11	0.82137	3.43935	5.78557	3.76407e-05	0.0045746	2.47099	UP
ENSMUST00000048687.11	0.706011	4.20822	5.8142	3.57309e-05	0.00440779	2.47032	UP
ENSMUST00000057885.13	0.777686	5.50011	5.89641	3.07875e-05	0.00399313	2.45687	UP
ENSMUST00000225023.2	1.22142	2.1047	5.78305	3.78138e-05	0.00457868	2.43497	UP
ENSMUST00000164181.2	0.47524	6.24619	5.94072	2.84239e-05	0.00382254	2.42979	NOT
ENSMUST00000146254.2	3.60517	-0.796794	6.21595	1.74118e-05	0.00270782	2.40629	UP
ENSMUST00000130310.8	3.23412	0.439334	5.95488	2.77092e-05	0.00375723	2.39698	UP
ENSMUST00000020251.10	0.556249	5.52176	5.86192	3.27685e-05	0.00413564	2.39155	NOT
ENSMUST00000044844.9	0.529159	6.81183	5.96508	2.72056e-05	0.00371969	2.38856	NOT
ENSMUST00000109104.2	-0.42205	6.3211	-5.90914	3.00881e-05	0.00394925	2.37598	NOT
ENSMUST00000040622.3	-0.464023	11.2005	-6.35941	1.35424e-05	0.00219991	2.35366	NOT
ENSMUST00000166121.4	0.949574	4.40385	5.74941	4.02059e-05	0.00482613	2.33333	UP
ENSMUST00000036951.13	0.544446	6.18338	5.86877	3.23646e-05	0.00413234	2.30653	NOT
ENSMUST00000169314.9	1.25428	3.00457	5.66734	4.67263e-05	0.00537992	2.27392	UP
ENSMUST00000129753.8	0.713347	5.54571	5.7996	3.66918e-05	0.00450938	2.27314	UP
ENSMUST00000081387.11	2.12053	0.225727	5.87151	3.22042e-05	0.00413234	2.23263	UP
ENSMUST00000180167.2	0.619518	7.55132	5.93241	2.88523e-05	0.00386432	2.21159	UP
ENSMUST00000100171.3	-0.337394	10.3043	-6.17526	1.87078e-05	0.00282892	2.19256	NOT
ENSMUST00000047379.15	2.63308	1.52373	5.67927	4.57144e-05	0.0053354	2.19044	UP
ENSMUST00000165033.2	1.54815	3.02282	5.61243	5.16962e-05	0.00578963	2.17805	UP
ENSMUST00000017548.7	0.696074	6.53308	5.82328	3.51465e-05	0.00435206	2.16847	UP
ENSMUST00000052725.15	0.882199	3.36966	5.60616	5.22973e-05	0.00583701	2.15764	UP
ENSMUST00000068569.5	0.524869	6.98005	5.84299	3.39113e-05	0.00426347	2.1372	NOT
ENSMUST00000161647.8	-0.464746	7.46271	-5.86901	3.23503e-05	0.00413234	2.12608	NOT
ENSMUST00000037023.9	0.77055	5.66036	5.7233	4.21711e-05	0.00501377	2.11534	UP
ENSMUST00000022698.8	1.64865	0.488724	5.74815	4.02986e-05	0.00482613	2.11317	UP
ENSMUST00000113237.4	0.411499	7.97247	5.89903	3.0642e-05	0.00399003	2.08317	NOT
ENSMUST00000109875.8	-2.52236	1.2186	-5.70021	4.3992e-05	0.00519264	2.0814	DOWN
ENSMUST00000160425.8	0.79491	3.85278	5.57745	5.51453e-05	0.00609272	2.07629	UP
ENSMUST00000176010.8	0.886943	4.96306	5.64526	4.86623e-05	0.00554447	2.07272	UP
ENSMUST00000154169.4	0.992968	3.72617	5.56622	5.63036e-05	0.0061822	2.06558	UP
ENSMUST00000116115.3	0.796808	5.34411	5.66831	4.66432e-05	0.00537992	2.06058	UP
ENSMUST00000070653.13	0.544482	5.83267	5.70684	4.34613e-05	0.00514851	2.05985	NOT
ENSMUST00000008036.9	0.754235	5.69191	5.6886	4.49381e-05	0.00526642	2.04633	UP
ENSMUST00000069285.6	1.52679	0.991639	5.62685	5.03405e-05	0.0056571	2.03346	UP
ENSMUST00000113211.8	0.950583	3.40564	5.53621	5.95217e-05	0.00642482	2.03151	UP
ENSMUST00000059980.11	0.839439	5.51676	5.66296	4.71039e-05	0.00539423	2.02498	UP
ENSMUST00000108534.9	1.03255	2.53092	5.52024	6.13119e-05	0.0065515	2.01456	UP
ENSMUST00000034121.11	0.282006	10.8183	6.14067	1.98886e-05	0.00293974	2.01366	NOT
ENSMUST00000156094.2	1.28009	2.7895	5.51109	6.23637e-05	0.0065632	2.00205	UP
ENSMUST00000039758.6	0.489722	5.92421	5.6719	4.63367e-05	0.00537276	1.98149	NOT
ENSMUST00000040647.11	1.99726	1.18197	5.56415	5.65198e-05	0.0061822	1.96334	UP
ENSMUST00000108857.2	0.558722	5.68055	5.64191	4.89631e-05	0.00555943	1.9621	NOT
ENSMUST00000016678.14	0.519275	8.03876	5.83796	3.42221e-05	0.00427759	1.95725	NOT
ENSMUST00000227463.2	0.934865	3.87766	5.5116	6.23037e-05	0.0065632	1.95477	UP
ENSMUST00000027249.13	1.13762	2.71327	5.48387	6.56012e-05	0.00683377	1.95425	UP
ENSMUST00000102678.5	0.568747	8.04631	5.83669	3.4301e-05	0.00427759	1.9532	NOT
ENSMUST00000194170.2	1.76878	1.58926	5.51865	6.14939e-05	0.0065515	1.94683	UP
ENSMUST00000032998.13	0.511816	6.43588	5.67763	4.58518e-05	0.0053354	1.91356	NOT
ENSMUST00000028175.7	1.59466	1.1358	5.53298	5.98792e-05	0.00644221	1.9095	UP
ENSMUST00000136312.2	-0.274966	10.2347	-6.01472	2.4889e-05	0.00346063	1.90806	NOT
ENSMUST00000025571.9	2.2921	0.658367	5.56414	5.65204e-05	0.0061822	1.86932	UP
ENSMUST00000103122.10	-0.553015	6.98437	-5.68942	4.48705e-05	0.00526642	1.86926	NOT
ENSMUST00000161684.8	2.33154	0.686016	5.55256	5.77456e-05	0.00629523	1.85637	UP
ENSMUST00000107086.9	-0.241277	9.75705	-5.919	2.95575e-05	0.00394268	1.81963	NOT
ENSMUST00000114795.3	1.87571	1.88586	5.40109	7.65654e-05	0.00768323	1.77867	UP
ENSMUST00000113589.8	0.969125	2.64818	5.37858	7.98642e-05	0.00791741	1.76957	UP
ENSMUST00000102814.5	0.586687	6.8872	5.62723	5.03045e-05	0.0056571	1.74776	UP
ENSMUST00000216472.2	1.41732	1.41136	5.40646	7.58001e-05	0.00767687	1.7434	UP
ENSMUST00000092620.6	0.80764	3.98203	5.39871	7.69078e-05	0.00769406	1.73908	UP
ENSMUST00000135382.2	1.47493	0.755521	5.46095	6.84628e-05	0.00704479	1.73136	UP
ENSMUST00000034966.9	0.463188	7.80108	5.66209	4.71794e-05	0.00539423	1.66701	NOT
ENSMUST00000016124.15	1.68312	-0.15715	5.53879	5.92377e-05	0.00641526	1.65656	UP
ENSMUST00000117293.2	-0.617342	4.08698	-5.34916	8.43998e-05	0.00821809	1.65198	DOWN
ENSMUST00000059155.11	1.12025	3.54309	5.32797	8.78315e-05	0.0084272	1.64736	UP
ENSMUST00000112237.2	0.426262	6.5884	5.54419	5.86475e-05	0.00637238	1.63957	NOT
ENSMUST00000061273.12	1.61098	1.8661	5.31388	9.01922e-05	0.0086034	1.63021	UP
ENSMUST00000151450.8	0.751093	4.23884	5.33786	8.62118e-05	0.00829606	1.5986	UP
ENSMUST00000125362.8	0.534027	5.92841	5.46557	6.7876e-05	0.00703108	1.59333	NOT
ENSMUST00000153671.8	-1.81479	2.91136	-5.27816	9.64789e-05	0.00895943	1.5921	DOWN
ENSMUST00000014457.15	0.59685	4.89025	5.37348	8.06326e-05	0.00796951	1.57853	UP
ENSMUST00000082409.1	0.526125	8.17715	5.63543	4.95509e-05	0.00560677	1.55299	NOT
ENSMUST00000035237.12	-0.358352	6.89481	-5.51074	6.24038e-05	0.0065632	1.5412	NOT
ENSMUST00000087871.11	1.74364	0.284332	5.38926	7.82816e-05	0.00780769	1.5313	UP
ENSMUST00000017851.4	-0.343105	12.3127	-6.03803	2.38733e-05	0.00336214	1.51798	NOT
ENSMUST00000134189.2	0.788745	3.36847	5.24362	0.00010299	0.00946641	1.50586	UP
ENSMUST00000005185.8	0.68665	5.13829	5.35215	8.3927e-05	0.00819638	1.50096	UP
ENSMUST00000003521.10	0.549184	6.35014	5.44517	7.05084e-05	0.00722339	1.4884	NOT
ENSMUST00000130335.8	1.07156	3.46522	5.23654	0.000104379	0.00954068	1.48599	UP
ENSMUST00000027634.13	0.672733	4.32059	5.28126	9.59156e-05	0.0089414	1.48348	UP
ENSMUST00000075453.9	0.74454	5.59638	5.36458	8.19903e-05	0.00806261	1.45319	UP
ENSMUST00000056977.14	2.84112	-1.33752	5.59387	5.34977e-05	0.00593066	1.4393	UP
ENSMUST00000017610.10	0.246052	9.99551	5.73701	4.11267e-05	0.00490739	1.42248	NOT
ENSMUST00000042334.16	0.573125	5.14847	5.30518	9.16843e-05	0.0086452	1.41118	NOT
ENSMUST00000009875.5	-0.358198	6.8343	-5.43579	7.17551e-05	0.00731233	1.40852	NOT
ENSMUST00000235922.2	2.09057	-1.02643	5.51349	6.20861e-05	0.0065632	1.40771	UP
ENSMUST00000014438.5	0.505532	5.08857	5.2973	9.30556e-05	0.00874936	1.40585	NOT
ENSMUST00000032492.9	0.547007	10.4226	5.77371	3.84629e-05	0.00464015	1.40448	NOT
ENSMUST00000140842.9	0.992994	2.47086	5.17148	0.000118099	0.0103892	1.40352	UP
ENSMUST00000134040.2	0.589287	4.56166	5.24205	0.000103297	0.00946815	1.37848	UP
ENSMUST00000103146.5	0.781983	3.91427	5.19658	0.000112598	0.0101785	1.37262	UP
ENSMUST00000205870.2	0.623584	3.80209	5.18727	0.000114606	0.0102457	1.36741	UP
ENSMUST00000094434.13	0.44391	10.7848	5.78892	3.7412e-05	0.00456371	1.36173	NOT
ENSMUST00000199369.5	0.905349	3.36375	5.16383	0.00011983	0.0104577	1.36003	UP
ENSMUST00000027830.5	0.564454	6.65387	5.40232	7.639e-05	0.00768323	1.35854	NOT
ENSMUST00000196114.2	1.57184	1.21813	5.18553	0.000114985	0.0102457	1.35598	UP
ENSMUST00000006035.13	0.361472	7.76142	5.49376	6.44048e-05	0.00673051	1.35517	NOT
ENSMUST00000111214.4	1.56902	4.00477	5.18306	0.000115527	0.0102457	1.33959	UP
ENSMUST00000115786.8	1.84748	0.1234	5.28211	9.57622e-05	0.0089414	1.3381	UP
ENSMUST00000006496.15	0.521632	7.17211	5.43261	7.21827e-05	0.00733314	1.33338	NOT
ENSMUST00000151118.2	0.838728	3.83445	5.17009	0.000118412	0.0103892	1.33151	UP
ENSMUST00000146233.8	1.01121	3.48079	5.15179	0.000122609	0.0106719	1.3292	UP
ENSMUST00000212709.2	0.757946	5.79823	5.30819	9.11651e-05	0.00864442	1.31394	UP
ENSMUST00000030693.13	1.45747	1.90253	5.1154	0.000131421	0.0113485	1.29151	UP
ENSMUST00000150781.2	1.50664	2.38602	5.09125	0.000137625	0.0116392	1.26083	UP
ENSMUST00000212494.2	0.674942	4.75229	5.19336	0.000113289	0.0102128	1.25882	UP
ENSMUST00000114881.9	0.71161	4.40409	5.16511	0.000119538	0.0104577	1.25453	UP
ENSMUST00000179094.8	0.297788	8.79286	5.53059	6.01456e-05	0.00644973	1.24972	NOT
ENSMUST00000030636.11	0.709693	4.87219	5.19667	0.000112578	0.0101785	1.24704	UP
ENSMUST00000112751.2	1.15375	3.38148	5.10043	0.000135232	0.011556	1.24202	UP
ENSMUST00000206421.2	-1.01615	2.42853	-5.08017	0.000140574	0.0117728	1.23934	DOWN
ENSMUST00000173844.8	0.911164	3.44025	5.09208	0.000137409	0.0116392	1.22228	UP
ENSMUST00000037481.10	2.19457	0.948982	5.11363	0.000131865	0.011357	1.20145	UP
ENSMUST00000221359.2	0.50897	7.7636	5.40115	7.65574e-05	0.00768323	1.17577	NOT
ENSMUST00000239432.2	0.677471	7.15442	5.34621	8.48689e-05	0.00821974	1.16938	UP
ENSMUST00000196111.5	0.326597	8.5354	5.46519	6.79238e-05	0.00703108	1.16918	NOT
ENSMUST00000054220.10	0.724257	4.08013	5.09606	0.000136366	0.0116226	1.16599	UP
ENSMUST00000018755.10	-0.442653	6.32386	-5.2631	9.92639e-05	0.00914957	1.16216	NOT
ENSMUST00000155094.8	1.45669	2.74137	5.03361	0.000153695	0.0125457	1.15284	UP
ENSMUST00000052622.6	1.13543	3.14522	5.04259	0.000151069	0.0124343	1.1513	UP
ENSMUST00000222929.2	1.19592	1.10754	5.06096	0.00014584	0.0120544	1.1373	UP
ENSMUST00000078505.14	-0.3573	7.049	-5.30675	9.14126e-05	0.00864442	1.12677	NOT
ENSMUST00000040298.5	0.829258	3.24734	5.02895	0.000155077	0.0125958	1.11997	UP
ENSMUST00000033486.6	1.84005	0.0459905	5.14442	0.000124342	0.0107941	1.11266	UP
ENSMUST00000030434.5	0.332567	7.96176	5.37999	7.96538e-05	0.00791741	1.10381	NOT
ENSMUST00000027677.8	1.37915	1.07642	5.04085	0.000151574	0.0124343	1.10027	UP
ENSMUST00000042235.15	0.725023	9.35831	5.50381	6.32125e-05	0.00662702	1.09175	UP
ENSMUST00000097897.11	-0.707541	5.41325	-5.14302	0.000124674	0.0107943	1.08746	DOWN
ENSMUST00000114996.8	1.72273	2.24193	4.9831	0.000169368	0.0134767	1.06759	UP
ENSMUST00000102536.11	0.753732	4.41296	5.06636	0.000144341	0.0119607	1.0665	UP
ENSMUST00000102911.10	0.743993	4.486	5.07168	0.000142877	0.0118693	1.06629	UP
ENSMUST00000043896.10	-0.390776	7.46418	-5.30693	9.1381e-05	0.00864442	1.05973	NOT
ENSMUST00000028817.7	0.443136	5.02668	5.10262	0.000134668	0.011556	1.04567	NOT
ENSMUST00000172912.8	0.769152	6.48884	5.22507	0.000106672	0.00972315	1.0436	UP
ENSMUST00000023958.10	0.656773	4.78175	5.07993	0.00014064	0.0117728	1.03876	UP
ENSMUST00000171451.2	1.93035	-1.50789	5.31564	8.98945e-05	0.0086	1.0168	UP
ENSMUST00000102543.5	-1.4803	2.33504	-4.95297	0.000179495	0.0138974	1.01104	DOWN
ENSMUST00000113002.9	-0.5289	5.4021	-5.10099	0.000135087	0.011556	1.0022	NOT
ENSMUST00000035295.6	0.363725	6.39691	5.17643	0.000116993	0.0103477	0.967791	NOT
ENSMUST00000045075.3	1.53767	0.17586	5.03784	0.000152453	0.0124753	0.966855	UP
ENSMUST00000159512.8	0.746196	4.43078	5.01476	0.000159361	0.0128483	0.965902	UP
ENSMUST00000044850.4	-0.333835	9.53043	-5.44401	7.06622e-05	0.00722339	0.962657	NOT
ENSMUST00000144942.2	1.46479	3.20757	4.93092	0.000187301	0.0142512	0.941426	UP
ENSMUST00000237316.2	0.819565	3.74483	4.95275	0.000179573	0.0138974	0.934325	UP
ENSMUST00000218107.2	0.814811	3.46767	4.93613	0.000185424	0.0141791	0.930392	UP
ENSMUST00000025192.8	0.576209	5.48313	5.07851	0.00014102	0.0117747	0.924979	NOT
ENSMUST00000082408.1	0.52036	7.94157	5.28612	9.5039e-05	0.00891031	0.923841	NOT
ENSMUST00000053150.8	0.720241	4.3189	4.98026	0.000170297	0.0134767	0.915959	UP
ENSMUST00000108707.3	-0.257954	11.3319	-5.60258	5.26443e-05	0.00585583	0.90883	NOT
ENSMUST00000098250.10	-0.426771	7.06625	-5.1883	0.000114383	0.0102457	0.89712	NOT
ENSMUST00000124680.8	1.19804	1.84556	4.88403	0.000205087	0.0152256	0.884858	UP
ENSMUST00000006667.11	0.718728	5.72123	5.07219	0.000142738	0.0118693	0.873267	UP
ENSMUST00000021880.10	1.47302	0.710937	4.92532	0.00018934	0.0143487	0.865416	UP
ENSMUST00000168974.9	-0.272612	9.21307	-5.3625	8.23117e-05	0.00806261	0.862202	NOT
ENSMUST00000105876.9	-0.515764	4.57769	-4.96038	0.000176949	0.0137919	0.859592	NOT
ENSMUST00000086763.13	-0.263738	9.12172	-5.34172	8.55888e-05	0.00826033	0.838285	NOT
ENSMUST00000216990.2	0.7707	4.88532	4.9813	0.000169956	0.0134767	0.833408	UP
ENSMUST00000097642.4	0.561943	4.12342	4.92201	0.000190555	0.0144076	0.832252	NOT
ENSMUST00000038027.6	0.659868	6.23651	5.08684	0.000138792	0.0117078	0.81769	UP
ENSMUST00000024932.12	0.415122	8.37715	5.26754	9.84348e-05	0.0090987	0.814211	NOT
ENSMUST00000026262.8	0.495834	10.4159	5.46078	6.84856e-05	0.00704479	0.809164	NOT
ENSMUST00000046831.11	1.64275	1.58005	4.84579	0.000220878	0.0157563	0.807038	UP
ENSMUST00000105798.8	-0.857035	4.05184	-4.88156	0.000206071	0.0152297	0.786748	DOWN
ENSMUST00000004554.14	0.638192	5.40436	4.99683	0.00016495	0.0132339	0.779832	UP
ENSMUST00000189799.7	1.97264	-0.605859	5.00417	0.000162638	0.0130804	0.779345	UP
ENSMUST00000223563.2	-0.906595	4.53408	-4.90807	0.000195761	0.0147205	0.777744	DOWN
ENSMUST00000035983.12	0.717338	3.57314	4.85942	0.000215109	0.0154793	0.776817	UP
ENSMUST00000184540.2	1.55615	2.97204	4.81755	0.000233339	0.0165373	0.746719	UP
ENSMUST00000067443.10	1.18642	4.08499	4.8619	0.000214078	0.015439	0.721733	UP
ENSMUST00000001304.9	-0.24995	9.98031	-5.36402	8.20768e-05	0.00806261	0.721548	NOT
ENSMUST00000046901.14	1.47417	1.76503	4.79128	0.000245581	0.0169296	0.718719	UP
ENSMUST00000031542.13	1.98846	2.49207	4.7838	0.000249189	0.0170352	0.705923	UP
ENSMUST00000223554.2	-0.53758	4.39454	-4.86463	0.000212945	0.0153912	0.702965	NOT
ENSMUST00000191127.7	0.34804	6.24826	5.0236	0.000156679	0.0126945	0.69563	NOT
ENSMUST00000111390.8	0.98434	3.36943	4.80409	0.000239531	0.0167301	0.691322	UP
ENSMUST00000156658.2	-0.634089	4.0085	-4.83095	0.000227338	0.0161819	0.691156	DOWN
ENSMUST00000194559.2	-0.641508	4.82839	-4.88829	0.000203401	0.0151347	0.687457	DOWN
ENSMUST00000071874.8	-0.342882	7.08045	-5.08198	0.000140088	0.0117728	0.685712	NOT
ENSMUST00000081649.10	1.71616	1.28877	4.78456	0.000248819	0.0170352	0.683731	UP
ENSMUST00000035105.7	0.939816	3.57408	4.81031	0.000236651	0.0166641	0.683395	UP
ENSMUST00000119241.2	1.31845	1.45793	4.7756	0.000253206	0.0171667	0.678871	UP
ENSMUST00000188593.2	1.36382	1.69049	4.76766	0.000257154	0.017327	0.674748	UP
ENSMUST00000154124.2	0.958845	4.23168	4.84739	0.000220192	0.0157416	0.673906	UP
ENSMUST00000147028.3	0.674	4.38297	4.85691	0.000216159	0.0155209	0.671158	UP
ENSMUST00000028938.7	-0.185445	14.2838	-5.83487	3.44147e-05	0.00427759	0.66926	NOT
ENSMUST00000113302.10	0.467243	4.59802	4.87149	0.000210131	0.0153377	0.668319	NOT
ENSMUST00000128822.2	-0.983998	2.71221	-4.75857	0.00026176	0.0175293	0.659038	DOWN
ENSMUST00000016640.8	0.83026	4.45839	4.85455	0.000217154	0.0155583	0.655055	UP
ENSMUST00000221871.2	0.958617	3.72589	4.80279	0.000240138	0.0167301	0.652728	UP
ENSMUST00000235496.2	-0.304029	8.47323	-5.18439	0.000115236	0.0102457	0.648648	NOT
ENSMUST00000034215.8	0.605603	5.28742	4.90733	0.00019604	0.0147205	0.625806	UP
ENSMUST00000063669.8	1.38338	4.13193	4.81038	0.000236618	0.0166641	0.618013	UP
ENSMUST00000129667.8	1.27324	1.60779	4.73501	0.000274084	0.0180236	0.614402	UP
ENSMUST00000111423.3	1.7561	-0.427935	4.87375	0.000209214	0.0153377	0.612222	UP
ENSMUST00000019962.15	-0.264819	9.69447	-5.27719	9.66551e-05	0.00895943	0.607621	NOT
ENSMUST00000079996.13	0.882788	3.83511	4.77569	0.000253161	0.0171667	0.588544	UP
ENSMUST00000063888.5	-0.28271	10.5275	-5.3459	8.49178e-05	0.00821974	0.580123	NOT
ENSMUST00000169035.8	1.21785	4.20343	4.79399	0.000244291	0.0168762	0.576027	UP
ENSMUST00000146507.2	1.27626	0.986184	4.73349	0.000274903	0.0180413	0.573854	UP
ENSMUST00000222849.2	-0.839596	2.58244	-4.70955	0.00028808	0.0186451	0.572226	DOWN
ENSMUST00000019997.11	-0.382309	6.56588	-4.97952	0.000170541	0.0134767	0.571516	NOT
ENSMUST00000003572.10	0.328764	6.40445	4.96777	0.000174445	0.0136944	0.561299	NOT
ENSMUST00000004959.3	-0.367344	7.10524	-5.01787	0.000158413	0.0128033	0.557184	NOT
ENSMUST00000126694.2	-0.794257	4.61631	-4.79738	0.000242683	0.0168004	0.548648	DOWN
ENSMUST00000111432.10	0.322273	8.9452	5.17339	0.00011767	0.0103797	0.531459	NOT
ENSMUST00000222705.2	-0.449228	5.75991	-4.88926	0.000203019	0.0151347	0.531071	NOT
ENSMUST00000041577.13	-0.613787	5.73234	-4.88202	0.000205886	0.0152297	0.527053	DOWN
ENSMUST00000077389.8	0.777934	4.04826	4.75614	0.000263002	0.0175767	0.524318	UP
ENSMUST00000129412.8	2.15911	0.968113	4.70639	0.000289868	0.0187239	0.523928	UP
ENSMUST00000189044.7	-1.07556	1.35584	-4.69284	0.000297664	0.0190199	0.514476	DOWN
ENSMUST00000079957.12	0.309014	9.28684	5.18987	0.000114042	0.0102457	0.501725	NOT
ENSMUST00000033074.8	0.498104	5.60126	4.86913	0.000211097	0.0153377	0.499888	NOT
ENSMUST00000026538.13	0.500426	6.21843	4.91332	0.000193784	0.014618	0.483658	NOT
ENSMUST00000005406.12	0.892339	4.28146	4.74373	0.000269456	0.0177906	0.467588	UP
ENSMUST00000049064.4	1.1884	2.35267	4.65155	0.000322775	0.0200978	0.467197	UP
ENSMUST00000062307.5	1.23495	1.79401	4.64936	0.000324165	0.0201461	0.466984	UP
ENSMUST00000150350.9	0.680278	4.58533	4.75496	0.000263611	0.0175816	0.443771	UP
ENSMUST00000085065.12	0.570462	5.19015	4.80163	0.000240684	0.0167326	0.436272	NOT
ENSMUST00000110815.9	0.497158	7.41064	4.98929	0.000167363	0.0133743	0.434669	NOT
ENSMUST00000071641.5	0.457622	6.01177	4.8695	0.000210944	0.0153377	0.432466	NOT
ENSMUST00000172785.8	0.932601	9.87731	5.21064	0.000109632	0.00996526	0.42474	UP
ENSMUST00000134850.2	1.77169	-1.39464	4.86973	0.000210851	0.0153377	0.423938	UP
ENSMUST00000202072.2	-0.749305	4.87141	-4.74939	0.000266494	0.0177019	0.414739	DOWN
ENSMUST00000035799.6	0.84968	5.37604	4.80329	0.000239907	0.0167301	0.407511	UP
ENSMUST00000015540.4	0.527309	6.25701	4.87791	0.000207534	0.0152691	0.407403	NOT
ENSMUST00000051396.13	0.586447	6.17709	4.86475	0.000212898	0.0153912	0.394359	UP
ENSMUST00000043338.10	-0.304948	8.33399	-5.04185	0.000151283	0.0124343	0.393788	NOT
ENSMUST00000069686.7	-0.525982	4.049	-4.67919	0.000305737	0.0193417	0.393737	NOT
ENSMUST00000045897.15	0.405198	7.42908	4.96781	0.000174433	0.0136944	0.390546	NOT
ENSMUST00000102642.9	0.656965	4.78987	4.74405	0.000269285	0.0177906	0.389927	UP
ENSMUST00000001834.4	0.293844	7.14616	4.93932	0.000184289	0.014136	0.383214	NOT
ENSMUST00000174699.8	1.62749	4.25631	4.69409	0.000296935	0.0190199	0.379587	UP
ENSMUST00000028135.15	0.480256	4.75732	4.73507	0.000274055	0.0180236	0.378863	NOT
ENSMUST00000053686.9	2.28316	-0.0563316	4.68401	0.000302857	0.019297	0.376881	UP
ENSMUST00000106489.9	-0.306259	7.22461	-4.93507	0.000185806	0.0141791	0.373198	NOT
ENSMUST00000102881.10	0.303484	8.95005	5.09128	0.000137618	0.0116392	0.369865	NOT
ENSMUST00000219053.2	1.73666	1.978	4.59459	0.000361038	0.0218581	0.369329	UP
ENSMUST00000031243.15	2.09374	4.14758	4.67698	0.000307061	0.0193417	0.368786	UP
ENSMUST00000044833.9	1.8097	0.553541	4.63486	0.000333534	0.0205725	0.365934	UP
ENSMUST00000000466.13	0.676657	5.15454	4.76182	0.000260102	0.017488	0.364051	UP
ENSMUST00000115231.4	0.909308	3.41661	4.63024	0.00033658	0.0206827	0.358302	UP
ENSMUST00000051955.9	0.766861	4.2965	4.68158	0.000304303	0.0193383	0.345549	UP
ENSMUST00000040430.8	1.43913	-0.523443	4.71079	0.000287383	0.0186367	0.341218	UP
ENSMUST00000102844.4	0.632538	5.1981	4.75008	0.000266133	0.0177019	0.333981	UP
ENSMUST00000222528.2	1.19176	2.15943	4.57314	0.00037663	0.0225524	0.328168	UP
ENSMUST00000045802.7	1.50673	0.165642	4.62877	0.000337553	0.0207037	0.311042	UP
ENSMUST00000135280.2	0.934945	2.29396	4.56426	0.000383283	0.0227592	0.308828	UP
ENSMUST00000063886.4	-0.542738	4.58345	-4.66964	0.000311516	0.0195242	0.298744	NOT
ENSMUST00000081650.15	0.62366	7.27777	4.90536	0.000196791	0.0147431	0.290766	UP
ENSMUST00000091497.11	-0.312748	7.67435	-4.93004	0.000187619	0.0142512	0.287448	NOT
ENSMUST00000079716.6	0.612398	4.83198	4.69238	0.000297929	0.0190199	0.282689	UP
ENSMUST00000082134.6	0.809231	3.55566	4.59821	0.000358476	0.0217834	0.282523	UP
ENSMUST00000211816.2	1.28332	3.54285	4.59469	0.000360968	0.0218581	0.27697	UP
ENSMUST00000011877.13	1.46243	2.21689	4.54485	0.000398258	0.0234202	0.275116	UP
ENSMUST00000199397.2	0.624481	5.28119	4.72375	0.000280186	0.0182421	0.268327	UP
ENSMUST00000114228.8	1.12909	1.92915	4.53849	0.000403294	0.02351	0.267882	UP
ENSMUST00000123128.8	2.10716	1.78232	4.53778	0.000403862	0.02351	0.266336	UP
ENSMUST00000173739.8	2.03708	1.35549	4.54066	0.000401569	0.02351	0.261405	UP
ENSMUST00000080861.6	0.716503	3.13761	4.56391	0.000383551	0.0227592	0.259486	UP
ENSMUST00000228017.2	1.00337	1.23082	4.53547	0.000405703	0.0235624	0.248009	UP
ENSMUST00000066039.8	-0.31152	6.62614	-4.82045	0.000232027	0.0164799	0.247299	NOT
ENSMUST00000211984.2	-0.441173	5.25947	-4.69587	0.000295899	0.0190012	0.236452	NOT
ENSMUST00000212129.2	0.565192	5.95294	4.76082	0.00026061	0.017488	0.227705	NOT
ENSMUST00000130171.8	-1.8711	1.20617	-4.53945	0.000402529	0.02351	0.227107	DOWN
ENSMUST00000047864.11	0.406949	8.07224	4.93906	0.000184379	0.014136	0.22392	NOT
ENSMUST00000165532.3	0.687178	5.4601	4.71499	0.000285028	0.0185206	0.220489	UP
ENSMUST00000161240.4	-0.307928	6.53952	-4.79901	0.000241911	0.0167824	0.219367	NOT
ENSMUST00000099337.5	1.60175	0.873825	4.52957	0.000410467	0.0236935	0.215968	UP
ENSMUST00000113306.4	0.827159	2.81617	4.52741	0.000412218	0.0236935	0.215358	UP
ENSMUST00000079085.11	0.595068	4.03737	4.58732	0.000366246	0.0220919	0.20153	UP
ENSMUST00000131049.2	-0.262468	8.67085	-4.96579	0.000175112	0.0137139	0.183593	NOT
ENSMUST00000206589.2	0.730518	4.69516	4.62779	0.000338204	0.0207049	0.17843	UP
ENSMUST00000219036.2	1.69532	-0.163834	4.56849	0.000380103	0.0226776	0.173796	UP
ENSMUST00000025236.9	1.60811	0.52908	4.51832	0.000419701	0.0239514	0.168115	UP
ENSMUST00000172503.3	0.878194	8.85895	4.97857	0.000170851	0.0134767	0.158392	UP
ENSMUST00000142786.8	1.51489	0.224394	4.53049	0.000409716	0.0236935	0.157069	UP
ENSMUST00000023128.8	0.372012	6.05988	4.73139	0.000276029	0.018042	0.153465	NOT
ENSMUST00000102912.8	1.82433	-0.213052	4.55435	0.000390859	0.0231093	0.145487	UP
ENSMUST00000105894.11	-0.4191	8.69844	-4.93987	0.000184093	0.014136	0.131209	NOT
ENSMUST00000127312.8	-0.398933	5.58165	-4.66824	0.000312373	0.0195242	0.125859	NOT
ENSMUST00000041266.11	1.29859	0.866182	4.47569	0.000456655	0.0255711	0.122988	UP
ENSMUST00000106470.8	0.623277	4.41362	4.57562	0.000374795	0.0224836	0.122316	UP
ENSMUST00000224300.2	-0.66266	3.93074	-4.52797	0.000411768	0.0236935	0.120817	DOWN
ENSMUST00000043709.8	-0.360804	9.00101	-4.96225	0.000176311	0.0137749	0.119656	NOT
ENSMUST00000009340.10	2.22783	1.08764	4.46677	0.000464805	0.025939	0.118852	UP
ENSMUST00000108613.10	0.262788	7.30694	4.80865	0.000237415	0.0166821	0.0985704	NOT
ENSMUST00000235891.2	-0.399842	6.11503	-4.69822	0.000294543	0.0189513	0.0939961	NOT
ENSMUST00000222462.2	0.553399	6.40205	4.73074	0.000276383	0.018042	0.0929609	NOT
ENSMUST00000068408.14	0.529307	4.89444	4.59156	0.000363198	0.0219484	0.0753471	NOT
ENSMUST00000034983.7	0.267407	8.14333	4.8687	0.000211271	0.0153377	0.0742697	NOT
ENSMUST00000108849.8	-0.32853	7.55618	-4.80548	0.000238884	0.0167301	0.061775	NOT
ENSMUST00000020969.5	1.35897	2.33326	4.42675	0.00050323	0.0276137	0.0533184	UP
ENSMUST00000059080.7	0.904701	3.22976	4.45544	0.000475367	0.0264833	0.0442449	UP
ENSMUST00000051672.9	0.827371	6.13446	4.67654	0.000307325	0.0193417	0.0291957	UP
ENSMUST00000179322.2	0.560568	4.43278	4.52732	0.000412293	0.0236935	0.0253359	NOT
ENSMUST00000212640.2	-1.42612	0.0804027	-4.48017	0.000452626	0.0254425	0.0250994	DOWN
ENSMUST00000136680.2	-0.538805	5.30947	-4.58635	0.000366952	0.0220939	0.015543	NOT
ENSMUST00000032335.13	-0.414927	6.07026	-4.65426	0.000321061	0.0200291	0.0150239	NOT
ENSMUST00000102696.5	0.584013	5.45071	4.60593	0.000353067	0.0214945	0.00772402	NOT
ENSMUST00000183211.8	-0.303247	9.89328	-4.98882	0.000167515	0.0133743	0.00443636	NOT
ENSMUST00000076922.6	0.495339	5.81388	4.63032	0.000336526	0.0206827	-0.00605191	NOT
ENSMUST00000029806.13	-0.293254	7.66102	-4.77879	0.000251633	0.0171665	-0.0100753	NOT
ENSMUST00000079041.7	-0.352306	6.06392	-4.63854	0.00033113	0.0204627	-0.0165061	NOT
ENSMUST00000105967.8	0.663396	6.01372	4.63954	0.000330482	0.0204612	-0.0228997	UP
ENSMUST00000106588.8	0.804041	3.7711	4.45295	0.000477725	0.0265511	-0.0231877	UP
ENSMUST00000086399.6	-0.263938	8.14556	-4.81327	0.000235289	0.0166396	-0.0261698	NOT
ENSMUST00000030651.9	0.334361	7.81481	4.78767	0.000247316	0.0170135	-0.0305823	NOT
ENSMUST00000054048.10	0.755639	4.44455	4.49812	0.00043681	0.0248845	-0.0344816	UP
ENSMUST00000120512.8	1.71833	-0.27481	4.43382	0.000496214	0.0273201	-0.056691	UP
ENSMUST00000201185.4	1.22346	3.53145	4.4188	0.000511249	0.0277971	-0.0593379	UP
ENSMUST00000151137.8	2.4837	1.76291	4.35264	0.000583217	0.0302198	-0.068217	UP
ENSMUST00000030884.10	1.1615	2.72806	4.37152	0.000561685	0.0293489	-0.0723839	UP
ENSMUST00000116560.3	0.259826	7.95162	4.77688	0.00025257	0.0171667	-0.0746705	NOT
ENSMUST00000136109.2	1.10736	0.464032	4.37565	0.000557076	0.0292478	-0.0796696	UP
ENSMUST00000209626.2	0.660041	3.42327	4.40107	0.000529588	0.0285352	-0.0798213	UP
ENSMUST00000025095.9	0.38722	5.38152	4.55313	0.000391799	0.0231232	-0.0831166	NOT
ENSMUST00000106004.8	0.69132	4.60035	4.48355	0.000449597	0.0253926	-0.0883426	UP
ENSMUST00000199728.2	1.95668	-1.80574	4.55695	0.000388857	0.0230324	-0.0978586	UP
ENSMUST00000161685.8	1.41093	-0.440232	4.4184	0.000511654	0.0277971	-0.105343	UP
ENSMUST00000024988.15	2.42535	0.825474	4.34109	0.000596802	0.0306217	-0.114421	UP
ENSMUST00000106602.10	0.717319	3.23621	4.3722	0.000560924	0.0293489	-0.114971	UP
ENSMUST00000124131.2	-0.246515	7.53402	-4.70044	0.000293266	0.0189062	-0.145594	NOT
ENSMUST00000179797.3	0.580886	3.82495	4.39236	0.000538854	0.0287045	-0.146666	NOT
ENSMUST00000156988.2	1.26964	0.675554	4.32464	0.000616727	0.0313002	-0.150257	UP
ENSMUST00000098104.10	1.01346	3.01264	4.33994	0.000598176	0.0306217	-0.155479	UP
ENSMUST00000065067.14	1.80218	0.241835	4.34064	0.000597342	0.0306217	-0.155897	UP
ENSMUST00000212432.2	0.863565	2.78088	4.32377	0.000617792	0.0313002	-0.166153	UP
ENSMUST00000096492.4	-0.299186	10.4777	-4.95677	0.000178183	0.0138552	-0.173394	NOT
ENSMUST00000143146.2	-0.931275	2.58749	-4.30486	0.00064157	0.0321412	-0.17601	DOWN
ENSMUST00000239113.2	1.0858	2.95243	4.32078	0.000621494	0.0314233	-0.186547	UP
ENSMUST00000169826.3	0.649986	3.4621	4.34318	0.000594319	0.0306217	-0.195741	UP
ENSMUST00000176778.8	0.72524	3.45372	4.34227	0.0005954	0.0306217	-0.196767	UP
ENSMUST00000114050.8	0.670633	2.8968	4.30995	0.000635086	0.0319627	-0.201276	UP
ENSMUST00000108429.8	0.671596	5.12103	4.47066	0.000461231	0.0257834	-0.202913	UP
ENSMUST00000110087.9	-0.743788	2.89589	-4.30211	0.000645112	0.0322547	-0.20333	DOWN
ENSMUST00000102826.4	1.54274	4.36444	4.40242	0.000528177	0.0285059	-0.205169	UP
ENSMUST00000045521.9	-0.226903	8.72563	-4.77369	0.000254148	0.0171951	-0.208384	NOT
ENSMUST00000117900.8	0.636794	3.24563	4.32352	0.000618106	0.0313002	-0.208889	UP
ENSMUST00000100330.10	-0.312958	8.46493	-4.7445	0.000269052	0.0177906	-0.218107	NOT
ENSMUST00000188251.7	0.832732	2.65084	4.29107	0.000659507	0.0328392	-0.218187	UP
ENSMUST00000196583.5	-0.307209	9.92183	-4.87862	0.000207248	0.0152691	-0.219473	NOT
ENSMUST00000162882.2	0.826994	2.95223	4.30158	0.000645801	0.0322547	-0.222627	UP
ENSMUST00000102823.10	-0.516331	4.85718	-4.42568	0.000504303	0.0276264	-0.224008	NOT
ENSMUST00000014691.10	-0.382662	6.99877	-4.61101	0.000349551	0.02132	-0.229657	NOT
ENSMUST00000125184.8	0.768405	3.1315	4.30645	0.000639546	0.0320888	-0.230341	UP
ENSMUST00000045779.6	0.953545	2.77287	4.28667	0.000665338	0.0329382	-0.236025	UP
ENSMUST00000054212.7	1.72663	-1.16978	4.39454	0.000536519	0.0287045	-0.239811	UP
ENSMUST00000062893.12	1.23879	0.737842	4.26744	0.000691432	0.033965	-0.245272	UP
ENSMUST00000101339.8	-0.673265	4.45684	-4.37339	0.000559593	0.029333	-0.256017	DOWN
ENSMUST00000021390.9	0.550291	5.21304	4.4516	0.000479011	0.0265511	-0.25618	NOT
ENSMUST00000172482.8	-1.18746	4.80293	-4.38903	0.000542432	0.0288057	-0.260116	DOWN
ENSMUST00000062694.16	-0.430599	6.87125	-4.58225	0.000369924	0.022232	-0.264128	NOT
ENSMUST00000117757.9	0.800734	7.5691	4.64579	0.000326447	0.0202496	-0.275562	UP
ENSMUST00000100036.10	0.904443	4.67815	4.3936	0.000537528	0.0287045	-0.278983	UP
ENSMUST00000138179.8	1.2556	1.97163	4.23946	0.000731269	0.0351845	-0.280293	UP
ENSMUST00000002090.3	0.606829	4.92565	4.41402	0.000516127	0.0279913	-0.280465	UP
ENSMUST00000047144.13	-0.348655	5.92525	-4.49151	0.000442567	0.0251127	-0.285121	NOT
ENSMUST00000062572.3	1.92803	-0.00672719	4.27374	0.000682759	0.0336397	-0.289178	UP
ENSMUST00000102537.10	-0.787233	2.60075	-4.24486	0.000723411	0.0349088	-0.290759	DOWN
ENSMUST00000088248.13	1.64381	0.469691	4.25	0.000715999	0.0346021	-0.292061	UP
ENSMUST00000030336.11	-0.398115	9.42867	-4.78554	0.000248346	0.0170352	-0.308818	NOT
ENSMUST00000107088.8	-0.280465	11.0696	-4.94465	0.000182401	0.0140831	-0.319215	NOT
ENSMUST00000154381.2	0.386545	4.7743	4.37879	0.000553606	0.0291469	-0.322044	NOT
ENSMUST00000205822.2	-0.932642	3.242	-4.25173	0.000713521	0.0345806	-0.325719	DOWN
ENSMUST00000020372.6	0.415381	4.91891	4.38158	0.000550541	0.0290909	-0.341966	NOT
ENSMUST00000060738.9	0.802585	2.53905	4.22064	0.000759388	0.0361663	-0.343165	UP
ENSMUST00000033824.8	0.201324	10.7047	4.89896	0.000199243	0.0148929	-0.345636	NOT
ENSMUST00000033683.8	0.5463	6.0614	4.48065	0.000452188	0.0254425	-0.346295	NOT
ENSMUST00000006914.11	0.364572	6.57575	4.52302	0.000415814	0.023854	-0.347858	NOT
ENSMUST00000072503.13	0.428123	6.19748	4.49089	0.000443111	0.0251127	-0.348192	NOT
ENSMUST00000118875.8	0.592235	8.36729	4.67713	0.000306974	0.0193417	-0.350746	UP
ENSMUST00000004381.14	-0.344865	7.8515	-4.62145	0.000342446	0.0209256	-0.35548	NOT
ENSMUST00000190972.3	-1.76073	-0.0610172	-4.256	0.000707447	0.0343914	-0.358352	DOWN
ENSMUST00000025181.18	0.654829	8.41026	4.67595	0.000307684	0.0193417	-0.361495	UP
ENSMUST00000165549.8	-0.334613	6.9454	-4.54025	0.000401895	0.02351	-0.362796	NOT
ENSMUST00000153574.8	1.37553	1.07028	4.19198	0.000804336	0.0378092	-0.363906	UP
ENSMUST00000086523.7	-0.677099	4.55922	-4.32576	0.000615352	0.0313002	-0.365096	DOWN
ENSMUST00000022529.8	0.500673	3.98296	4.28809	0.000663446	0.0329354	-0.372174	NOT
ENSMUST00000044165.14	-0.446751	6.789	-4.51953	0.000418696	0.0239514	-0.374582	NOT
ENSMUST00000222971.2	0.539715	6.80444	4.52956	0.000410471	0.0236935	-0.375418	NOT
ENSMUST00000032898.9	0.426292	5.37447	4.40291	0.000527657	0.0285059	-0.380286	NOT
ENSMUST00000021933.8	0.516169	9.5559	4.77044	0.000255763	0.0172688	-0.380831	NOT
ENSMUST00000185315.7	0.899194	2.34603	4.19132	0.000805408	0.0378092	-0.386434	UP
ENSMUST00000179781.8	0.243875	8.55294	4.66836	0.000312297	0.0195242	-0.397008	NOT
ENSMUST00000040914.3	0.674514	3.89549	4.26863	0.000689785	0.0339349	-0.398463	UP
ENSMUST00000091233.7	-1.20273	2.8721	-4.19343	0.000801999	0.0378092	-0.400765	DOWN
ENSMUST00000006181.7	0.253905	7.46107	4.57047	0.00037862	0.0226303	-0.402216	NOT
ENSMUST00000010502.13	0.381943	5.71743	4.42051	0.00050951	0.0277971	-0.405183	NOT
ENSMUST00000129428.8	-0.353375	6.56815	-4.47996	0.000452807	0.0254425	-0.418507	NOT
ENSMUST00000150081.8	-1.73332	0.432278	-4.19156	0.000805012	0.0378092	-0.419914	DOWN
ENSMUST00000157041.2	1.24123	0.265492	4.18179	0.000820963	0.0383748	-0.42406	UP
ENSMUST00000150578.2	1.8058	-1.87868	4.33732	0.000601315	0.0307345	-0.428816	UP
ENSMUST00000101445.11	-0.527358	3.78726	-4.23523	0.000737501	0.0354324	-0.430523	NOT
ENSMUST00000109241.5	-0.197328	9.46254	-4.73041	0.000276562	0.018042	-0.430693	NOT
ENSMUST00000080880.12	0.847974	4.01435	4.25955	0.000702428	0.034198	-0.434738	UP
ENSMUST00000112384.10	1.12168	2.10415	4.1555	0.000865509	0.0396101	-0.44111	UP
ENSMUST00000110894.9	0.47189	4.43663	4.28654	0.000665509	0.0329382	-0.447411	NOT
ENSMUST00000004829.13	2.16877	1.43354	4.13864	0.00089535	0.0405801	-0.455369	UP
ENSMUST00000102637.8	0.612304	4.37734	4.27459	0.0006816	0.0336331	-0.462151	UP
ENSMUST00000162349.8	0.668468	5.4527	4.36688	0.000566899	0.0295743	-0.467686	UP
ENSMUST00000028619.5	0.355868	5.81926	4.39511	0.000535909	0.0287045	-0.473354	NOT
ENSMUST00000056937.12	0.624719	2.85955	4.16197	0.000854321	0.0392941	-0.479711	UP
ENSMUST00000034311.15	0.52696	4.20959	4.25135	0.000714065	0.0345806	-0.47982	NOT
ENSMUST00000070872.13	-0.325047	7.92568	-4.56515	0.000382611	0.0227592	-0.481943	NOT
ENSMUST00000032177.10	-1.01246	1.96235	-4.12645	0.000917583	0.0410772	-0.482106	DOWN
ENSMUST00000105464.9	-0.667109	5.9296	-4.38743	0.000544166	0.0288057	-0.482677	DOWN
ENSMUST00000235196.2	0.83166	2.00905	4.12908	0.000912739	0.0409721	-0.48582	UP
ENSMUST00000125291.3	-0.742371	2.97118	-4.15607	0.00086451	0.0396101	-0.486775	DOWN
ENSMUST00000118110.3	0.803264	2.88016	4.15481	0.000866705	0.0396101	-0.496156	UP
ENSMUST00000027941.14	0.711739	4.94041	4.30684	0.000639041	0.0320888	-0.496183	UP
ENSMUST00000153679.2	0.725585	1.79927	4.11913	0.000931214	0.0412373	-0.496816	UP
ENSMUST00000152721.2	0.917511	5.09219	4.31892	0.000623806	0.0314916	-0.499359	UP
ENSMUST00000147220.8	1.1735	1.73642	4.11473	0.000939492	0.0414919	-0.503521	UP
ENSMUST00000170715.8	0.68686	6.0633	4.39984	0.00053089	0.0285584	-0.509175	UP
ENSMUST00000149531.2	-1.35793	0.625675	-4.12489	0.000920474	0.0411504	-0.514276	DOWN
ENSMUST00000039882.13	0.649968	3.03712	4.15092	0.000873513	0.0398657	-0.518577	UP
ENSMUST00000210901.2	1.39452	4.6132	4.26294	0.000697677	0.0341186	-0.522948	UP
ENSMUST00000054279.15	1.17217	2.24458	4.11046	0.000947602	0.0417377	-0.532658	UP
ENSMUST00000136479.8	0.42127	6.46128	4.42094	0.000509074	0.0277971	-0.533173	NOT
ENSMUST00000184082.3	-0.96709	2.59539	-4.10792	0.000952469	0.0418959	-0.546259	DOWN
ENSMUST00000166658.8	0.546085	3.83917	4.18745	0.000811688	0.0380496	-0.54808	NOT
ENSMUST00000109594.8	-0.95076	3.29761	-4.13521	0.000901548	0.0406366	-0.555249	DOWN
ENSMUST00000021860.7	0.332092	9.54422	4.68095	0.000304685	0.0193383	-0.555346	NOT
ENSMUST00000102898.5	0.513672	5.50616	4.32707	0.000613735	0.0313002	-0.55561	NOT
ENSMUST00000053666.8	-1.43804	4.03132	-4.17338	0.000834952	0.0387526	-0.556262	DOWN
ENSMUST00000159665.2	-0.834304	2.17056	-4.08771	0.000992057	0.043117	-0.562006	DOWN
ENSMUST00000234823.2	0.818972	2.12747	4.08973	0.000988024	0.0430231	-0.564518	UP
ENSMUST00000028882.2	-0.350626	6.93884	-4.4381	0.000492018	0.0271346	-0.565953	NOT
ENSMUST00000220166.2	1.79621	1.34057	4.07711	0.00101349	0.0436437	-0.566594	UP
ENSMUST00000075304.14	0.791681	1.79256	4.07581	0.00101614	0.0436442	-0.576582	UP
ENSMUST00000193210.6	0.471325	3.93608	4.17818	0.000826943	0.0385557	-0.580163	NOT
ENSMUST00000087342.13	0.893187	2.04144	4.07764	0.0010124	0.0436437	-0.583058	UP
ENSMUST00000165536.8	-0.315479	7.51506	-4.47898	0.00045369	0.0254485	-0.584183	NOT
ENSMUST00000061251.6	1.52963	-0.098987	4.10269	0.000962554	0.0422392	-0.584566	UP
ENSMUST00000077706.10	1.61152	1.01047	4.06826	0.00103174	0.0439682	-0.585343	UP
ENSMUST00000066052.12	0.77653	3.78553	4.16374	0.000851279	0.0392612	-0.588044	UP
ENSMUST00000094065.5	0.640068	3.5935	4.14792	0.000878791	0.0400509	-0.591215	UP
ENSMUST00000214859.2	0.361699	6.56813	4.39764	0.000533215	0.0286365	-0.597694	NOT
ENSMUST00000169609.2	0.695855	3.9415	4.1689	0.000842496	0.0390476	-0.600765	UP
ENSMUST00000047085.16	0.551711	3.20075	4.11636	0.000936421	0.041412	-0.6025	NOT
ENSMUST00000182755.8	1.0414	4.34768	4.19946	0.000792348	0.0376268	-0.606313	UP
ENSMUST00000016672.11	0.330881	7.21012	4.44612	0.000484241	0.0267506	-0.609819	NOT
ENSMUST00000055040.13	1.65071	-0.32894	4.09799	0.000971713	0.0424578	-0.610905	UP
ENSMUST00000026993.14	1.29716	1.03434	4.05323	0.00106349	0.0447977	-0.611601	UP
ENSMUST00000159645.8	-0.777921	2.663	-4.0758	0.00101616	0.0436442	-0.613932	DOWN
ENSMUST00000102745.10	-0.543457	4.93062	-4.23384	0.000739557	0.0354782	-0.616176	NOT
ENSMUST00000069097.13	-0.598258	4.09642	-4.16157	0.000855	0.0392941	-0.617741	DOWN
ENSMUST00000064795.6	1.73771	-0.181824	4.08134	0.00100488	0.0434499	-0.625056	UP
ENSMUST00000081593.13	0.531952	6.0697	4.34174	0.000596031	0.0306217	-0.625645	NOT
ENSMUST00000034742.8	1.90061	0.93205	4.04553	0.00108016	0.0452675	-0.627654	UP
ENSMUST00000109109.8	-0.852836	3.80593	-4.13083	0.000909542	0.0408845	-0.628031	DOWN
ENSMUST00000218526.2	-0.641882	2.52645	-4.06096	0.00104705	0.0443326	-0.633667	DOWN
ENSMUST00000003910.13	0.483728	7.04236	4.41899	0.000511059	0.0277971	-0.637412	NOT
ENSMUST00000082421.1	0.369737	8.21257	4.51894	0.000419181	0.0239514	-0.638354	NOT
ENSMUST00000045665.13	-1.28346	2.35732	-4.04202	0.00108783	0.0453519	-0.651172	DOWN
ENSMUST00000156678.8	0.688749	3.18981	4.0839	0.00099971	0.0433349	-0.664757	UP
ENSMUST00000170091.3	1.45431	1.22792	4.02272	0.00113107	0.0461627	-0.664776	UP
ENSMUST00000105372.9	0.429739	5.66055	4.28474	0.000667899	0.0330067	-0.667106	NOT
ENSMUST00000110357.2	1.4854	1.23488	4.02128	0.00113436	0.0462395	-0.667371	UP
ENSMUST00000142408.2	1.29382	2.41628	4.04444	0.00108253	0.0453089	-0.66829	UP
ENSMUST00000037488.8	-0.406091	6.84761	-4.37884	0.000553553	0.0291469	-0.668655	NOT
ENSMUST00000009358.9	-0.473089	4.78549	-4.19304	0.000802635	0.0378092	-0.67348	NOT
ENSMUST00000117217.8	-0.319449	8.75891	-4.5375	0.000404085	0.02351	-0.685887	NOT
ENSMUST00000231473.2	-0.343005	5.71003	-4.26581	0.000693683	0.0340104	-0.698204	NOT
ENSMUST00000077946.12	-0.299114	6.74068	-4.35333	0.000582415	0.0302198	-0.70392	NOT
ENSMUST00000111194.8	2.25465	-0.404425	4.0403	0.00109162	0.0453997	-0.709426	UP
ENSMUST00000205534.2	-0.663898	3.14971	-4.04145	0.00108909	0.0453519	-0.726111	DOWN
ENSMUST00000003612.13	0.574154	4.79263	4.17733	0.000828358	0.0385557	-0.72664	NOT
ENSMUST00000073471.13	0.544133	5.29443	4.22147	0.000758132	0.0361589	-0.729055	NOT
ENSMUST00000140404.2	1.74962	-2.20857	4.16447	0.000850029	0.0392612	-0.729203	UP
ENSMUST00000117836.8	0.352237	7.14485	4.37819	0.000554266	0.0291469	-0.735659	NOT
ENSMUST00000166691.8	1.24907	3.41931	4.06231	0.0010442	0.0442858	-0.736194	UP
ENSMUST00000033463.10	-0.24311	8.03239	-4.44785	0.000482584	0.0267041	-0.738632	NOT
ENSMUST00000159847.2	0.713021	2.5816	4.01254	0.00115457	0.0466578	-0.740611	UP
ENSMUST00000053661.7	-0.545504	5.13902	-4.18563	0.000814655	0.0381342	-0.748306	NOT
ENSMUST00000028806.12	-0.409585	5.76776	-4.24287	0.000726294	0.0349965	-0.75212	NOT
ENSMUST00000034881.8	0.432295	4.50732	4.137	0.000898312	0.0406022	-0.75506	NOT
ENSMUST00000145610.8	-0.250846	8.69037	-4.49452	0.000439941	0.0250195	-0.761443	NOT
ENSMUST00000149431.2	-0.326782	6.74263	-4.32451	0.00061689	0.0313002	-0.761778	NOT
ENSMUST00000129043.8	0.877676	2.37823	3.99237	0.00120261	0.0483018	-0.763528	UP
ENSMUST00000229057.2	-1.19162	1.22315	-3.96748	0.00126473	0.0497015	-0.765566	DOWN
ENSMUST00000085679.13	0.349048	5.54567	4.22448	0.000753556	0.035993	-0.766335	NOT
ENSMUST00000040789.6	1.23528	0.776795	3.96674	0.00126663	0.0497166	-0.770471	UP
ENSMUST00000000769.14	-0.597326	3.53955	-4.04288	0.00108595	0.0453363	-0.770531	DOWN
ENSMUST00000222667.2	1.26399	1.96758	3.97372	0.00124886	0.0494331	-0.773655	UP
ENSMUST00000193961.6	0.977475	1.96578	3.97002	0.00125825	0.0496493	-0.78027	UP
ENSMUST00000111453.2	2.00471	0.235941	3.97091	0.00125597	0.0496493	-0.783848	UP
ENSMUST00000000687.9	0.626984	3.31786	4.02863	0.00111764	0.0459484	-0.787153	UP
ENSMUST00000226581.2	-0.592231	3.56882	-4.03559	0.00110204	0.0456638	-0.789022	DOWN
ENSMUST00000058914.10	0.966211	4.252	4.09696	0.000973729	0.0424893	-0.793212	UP
ENSMUST00000107651.9	0.56189	5.16109	4.17474	0.000832671	0.0387015	-0.798522	NOT
ENSMUST00000108496.9	1.08848	2.43057	3.97584	0.00124352	0.0494331	-0.799171	UP
ENSMUST00000186755.2	-0.609274	3.83029	-4.04858	0.00107352	0.0451043	-0.799595	DOWN
ENSMUST00000143107.2	0.652324	3.9114	4.06519	0.00103813	0.044126	-0.799669	UP
ENSMUST00000062117.14	0.254892	6.85461	4.31499	0.000628726	0.0316913	-0.811751	NOT
ENSMUST00000161741.8	0.594523	3.50959	4.02837	0.00111823	0.0459484	-0.812537	UP
ENSMUST00000163694.4	0.758268	4.85146	4.1389	0.000894889	0.0405801	-0.814791	UP
ENSMUST00000021884.10	0.943872	1.53186	3.94233	0.00133079	0.0510008	-0.81497	UP
ENSMUST00000174854.3	1.30894	2.31109	3.96003	0.00128394	0.0502159	-0.820359	UP
ENSMUST00000026469.9	0.545548	4.69593	4.12017	0.000929261	0.0412064	-0.823031	NOT
ENSMUST00000207826.2	-0.476856	4.97123	-4.13226	0.000906913	0.0408223	-0.827768	NOT
ENSMUST00000103191.11	0.843122	2.18854	3.94968	0.00131112	0.0505559	-0.830831	UP
ENSMUST00000078676.6	0.52443	4.1899	4.07069	0.00102668	0.0438665	-0.832962	NOT
ENSMUST00000087629.10	0.890232	4.77826	4.12167	0.000926456	0.0411701	-0.836027	UP
ENSMUST00000023076.6	-0.284883	8.40071	-4.43077	0.000499235	0.0274404	-0.837625	NOT
ENSMUST00000141281.4	0.624731	2.89496	3.97523	0.00124505	0.0494331	-0.841337	UP
ENSMUST00000033427.7	-0.267017	7.99296	-4.39289	0.000538281	0.0287045	-0.841996	NOT
ENSMUST00000074846.14	-1.32114	2.77449	-3.95597	0.00129453	0.0505098	-0.843007	DOWN
ENSMUST00000120441.8	0.349202	6.0117	4.2267	0.00075022	0.0358859	-0.844733	NOT
ENSMUST00000013807.8	-0.244347	7.41999	-4.34167	0.000596114	0.0306217	-0.845963	NOT
ENSMUST00000022169.10	-0.171297	14.026	-5.03004	0.000154753	0.0125958	-0.847169	NOT
ENSMUST00000087200.4	0.434118	4.92851	4.12834	0.0009141	0.0409772	-0.847709	NOT
ENSMUST00000078804.12	0.706989	4.31134	4.07259	0.00102276	0.043813	-0.850926	UP
ENSMUST00000027189.15	-0.313524	6.21554	-4.23313	0.000740616	0.0354782	-0.854275	NOT
ENSMUST00000226145.2	-0.339823	8.79178	-4.4519	0.000478719	0.0265511	-0.86367	NOT
ENSMUST00000161031.2	0.757207	3.22541	3.97998	0.00123315	0.0492544	-0.870716	UP
ENSMUST00000004745.9	0.334584	5.9025	4.20062	0.000790508	0.0375938	-0.877759	NOT
ENSMUST00000106142.8	-0.470555	4.25697	-4.04354	0.00108451	0.0453338	-0.879567	NOT
ENSMUST00000237064.2	0.555085	3.27694	3.97814	0.00123774	0.0493501	-0.879584	NOT
ENSMUST00000224130.2	-0.755113	2.63432	-3.93413	0.00135309	0.0516882	-0.880705	DOWN
ENSMUST00000196205.5	0.863661	2.87856	3.95242	0.00130388	0.0505559	-0.88443	UP
ENSMUST00000155805.2	0.679382	4.00356	4.02659	0.00112225	0.0459484	-0.890453	UP
ENSMUST00000198190.5	-0.506395	4.7901	-4.08127	0.00100501	0.0434499	-0.89624	NOT
ENSMUST00000026420.7	0.78908	3.06859	3.95387	0.00130006	0.0505559	-0.902511	UP
ENSMUST00000224430.2	0.903387	3.40286	3.97485	0.00124601	0.0494331	-0.904044	UP
ENSMUST00000135137.2	0.507265	3.41927	3.9742	0.00124764	0.0494331	-0.905486	NOT
ENSMUST00000220501.2	1.49236	-1.04143	3.94662	0.00131927	0.0507292	-0.925328	UP
ENSMUST00000032926.12	0.785899	3.43413	3.96433	0.00127282	0.0498999	-0.928435	UP
ENSMUST00000171172.3	-0.426257	4.42404	-4.03226	0.00110949	0.0458523	-0.931412	NOT
ENSMUST00000114845.10	0.601752	4.3697	4.03555	0.00110214	0.0456638	-0.934076	UP
ENSMUST00000154573.8	-1.01235	-0.097861	-3.90084	0.0014475	0.0544082	-0.938713	DOWN
ENSMUST00000030412.11	0.253532	8.70995	4.41323	0.000516935	0.0279913	-0.939218	NOT
ENSMUST00000008462.11	-0.548826	3.88221	-3.9797	0.00123384	0.0492544	-0.943283	NOT
ENSMUST00000102925.4	0.389322	6.24724	4.19672	0.000796717	0.0377796	-0.946838	NOT
ENSMUST00000089510.5	0.496052	3.85556	3.98467	0.0012215	0.0489404	-0.948303	NOT
ENSMUST00000065896.9	0.904939	1.89358	3.87787	0.00151653	0.0559769	-0.94839	UP
ENSMUST00000209531.2	-0.614963	3.04482	-3.91891	0.00139545	0.0529981	-0.951332	DOWN
ENSMUST00000019998.9	1.10027	2.19926	3.88436	0.0014967	0.0558212	-0.9552	UP
ENSMUST00000165485.8	0.743199	3.46952	3.95283	0.0013028	0.0505559	-0.955571	UP
ENSMUST00000022377.11	0.48089	4.78284	4.05807	0.00105317	0.0445188	-0.961767	NOT
ENSMUST00000110504.2	0.30117	5.72964	4.14271	0.00088805	0.0404167	-0.96299	NOT
ENSMUST00000047950.6	-0.437782	6.401	-4.19286	0.000802914	0.0378092	-0.964234	NOT
ENSMUST00000202461.4	0.707605	3.07028	3.91912	0.00139484	0.0529981	-0.969662	UP
ENSMUST00000121440.4	-0.45666	5.83406	-4.13793	0.000896635	0.0405823	-0.974019	NOT
ENSMUST00000027601.11	0.597877	5.08985	4.0739	0.00102007	0.043755	-0.987415	UP
ENSMUST00000024742.9	-0.44722	5.61363	-4.11139	0.000945843	0.0417163	-0.987797	NOT
ENSMUST00000046770.10	0.521792	4.2971	4.00007	0.00118404	0.047731	-0.990952	NOT
ENSMUST00000034343.5	0.244658	7.1887	4.25104	0.000714501	0.0345806	-0.99851	NOT
ENSMUST00000123879.8	0.623185	4.5258	4.0161	0.0011463	0.0464954	-1.00031	UP
ENSMUST00000032198.11	1.41705	4.02176	3.96888	0.00126115	0.0496801	-1.00649	UP
ENSMUST00000121038.8	0.723362	3.49571	3.9275	0.00137136	0.0522647	-1.00857	UP
ENSMUST00000074058.11	0.402826	4.64002	4.01885	0.00113994	0.0464095	-1.01327	NOT
ENSMUST00000220518.2	-0.632256	4.22532	-3.96778	0.00126396	0.0497015	-1.01868	DOWN
ENSMUST00000176425.2	0.350157	6.65162	4.19487	0.000799688	0.0378092	-1.02055	NOT
ENSMUST00000103009.5	0.693264	3.87802	3.95033	0.0013094	0.0505559	-1.02093	UP
ENSMUST00000110073.8	-1.40843	3.19713	-3.88277	0.00150153	0.0558631	-1.02196	DOWN
ENSMUST00000091789.11	0.446824	5.24346	4.06896	0.00103028	0.0439629	-1.02461	NOT
ENSMUST00000020970.10	1.70185	1.81747	3.8332	0.00166048	0.0597588	-1.02755	UP
ENSMUST00000090749.13	0.293327	8.91458	4.38734	0.000544265	0.0288057	-1.02961	NOT
ENSMUST00000143570.2	0.639395	4.27346	3.97742	0.00123955	0.0493623	-1.03268	UP
ENSMUST00000100750.10	-0.826711	3.2455	-3.8837	0.0014987	0.0558212	-1.0381	DOWN
ENSMUST00000001335.7	0.603995	3.55971	3.91116	0.00141753	0.0535884	-1.04893	UP
ENSMUST00000161012.8	1.10077	1.92536	3.81649	0.00171781	0.0609387	-1.06512	UP
ENSMUST00000017974.13	0.687165	4.98881	4.02533	0.00112513	0.0459776	-1.06663	UP
ENSMUST00000177428.2	0.388641	6.7476	4.17798	0.000827272	0.0385557	-1.07189	NOT
ENSMUST00000005548.8	0.477533	5.06334	4.02833	0.00111832	0.0459484	-1.07286	NOT
ENSMUST00000089377.6	1.30243	0.516728	3.79381	0.00179886	0.0631544	-1.08136	UP
ENSMUST00000045041.12	-0.307665	6.40536	-4.13616	0.000899832	0.040615	-1.08329	NOT
ENSMUST00000134425.8	1.17234	0.881889	3.78911	0.00181614	0.0635341	-1.08495	UP
ENSMUST00000029053.8	-0.228579	7.84323	-4.26021	0.000701512	0.034198	-1.08512	NOT
ENSMUST00000027517.14	0.244181	7.8131	4.26192	0.000699111	0.0341378	-1.08548	NOT
ENSMUST00000221189.2	1.16022	-0.36665	3.81106	0.0017369	0.0614165	-1.09315	UP
ENSMUST00000168005.8	0.730539	4.66354	3.98189	0.00122838	0.0491563	-1.09377	UP
ENSMUST00000018430.7	0.299136	6.43321	4.13943	0.000893935	0.0405801	-1.09401	NOT
ENSMUST00000218299.2	-1.46509	-1.0336	-3.85555	0.00158681	0.0580485	-1.09575	DOWN
ENSMUST00000161686.2	-0.952755	0.78734	-3.78441	0.00183356	0.0640068	-1.09645	DOWN
ENSMUST00000111442.3	-0.232355	9.08809	-4.36511	0.000568903	0.0296317	-1.09646	NOT
ENSMUST00000020359.7	-1.63394	-0.876505	-3.84597	0.001618	0.0587311	-1.09772	DOWN
ENSMUST00000161296.2	-1.74534	-0.899133	-3.84758	0.00161269	0.0586683	-1.09901	DOWN
ENSMUST00000114191.8	0.995738	1.90895	3.79363	0.00179952	0.0631544	-1.10673	UP
ENSMUST00000075738.6	0.460204	5.82162	4.07952	0.00100857	0.0435461	-1.10861	NOT
ENSMUST00000078034.5	0.892053	2.75771	3.82881	0.00167535	0.0600162	-1.10954	UP
ENSMUST00000105470.9	-0.371139	6.39415	-4.12141	0.000926953	0.0411701	-1.10972	NOT
ENSMUST00000031239.13	-0.896512	2.53168	-3.80797	0.00174781	0.061736	-1.11053	DOWN
ENSMUST00000059595.11	-0.574508	4.56691	-3.95027	0.00130957	0.0505559	-1.11387	NOT
ENSMUST00000109864.8	-0.365331	6.18813	-4.10121	0.000965424	0.0422392	-1.1139	NOT
ENSMUST00000160311.3	1.55722	-1.60098	3.85884	0.00157626	0.0577269	-1.11766	UP
ENSMUST00000159569.9	-0.523812	3.51976	-3.86248	0.00156464	0.0574296	-1.12155	NOT
ENSMUST00000035240.7	-0.440101	5.732	-4.05537	0.00105892	0.0446625	-1.12186	NOT
ENSMUST00000016638.8	0.286921	8.3606	4.29188	0.000658436	0.0328358	-1.12253	NOT
ENSMUST00000021347.12	-0.371368	6.50716	-4.12209	0.000925669	0.0411701	-1.12794	NOT
ENSMUST00000069994.11	-0.209062	8.16652	-4.26528	0.000694428	0.0340104	-1.13253	NOT
ENSMUST00000207430.2	1.57197	-1.61219	3.8476	0.00161264	0.0586683	-1.13605	UP
ENSMUST00000053392.11	-0.545423	3.57898	-3.85898	0.00157581	0.0577269	-1.13654	NOT
ENSMUST00000125203.8	1.344	-1.30835	3.8274	0.00168016	0.0600563	-1.13984	UP
ENSMUST00000001454.14	0.637406	4.97327	3.98673	0.00121643	0.0487968	-1.14082	UP
ENSMUST00000140626.8	0.791434	3.31792	3.84438	0.00162321	0.0588554	-1.14671	UP
ENSMUST00000196764.2	-0.415332	5.41155	-4.01398	0.00115122	0.0465797	-1.14775	NOT
ENSMUST00000003717.13	-0.349249	5.90543	-4.0576	0.00105416	0.0445188	-1.15203	NOT
ENSMUST00000225518.2	-0.688094	2.10302	-3.76805	0.00189561	0.0656839	-1.15659	DOWN
ENSMUST00000140325.2	1.50839	-1.79825	3.84645	0.00161641	0.0587311	-1.15668	UP
ENSMUST00000188524.2	0.544824	3.12105	3.82487	0.00168884	0.060171	-1.15742	NOT
ENSMUST00000025411.9	0.880068	1.09253	3.74919	0.00196975	0.0671884	-1.15807	UP
ENSMUST00000129533.8	0.780836	1.99375	3.76818	0.0018951	0.0656839	-1.15929	UP
ENSMUST00000219591.2	0.741456	3.48837	3.84794	0.00161151	0.0586683	-1.16331	UP
ENSMUST00000135573.8	0.402343	6.64535	4.12128	0.000927186	0.0411701	-1.16887	NOT
ENSMUST00000040166.14	0.87807	2.62385	3.78919	0.00181585	0.0635341	-1.17166	UP
ENSMUST00000155233.8	0.967916	1.612	3.74747	0.00197666	0.0672845	-1.1771	UP
ENSMUST00000136252.8	-1.21731	0.680973	-3.73962	0.00200849	0.0680607	-1.17822	DOWN
ENSMUST00000180200.8	0.844174	2.02498	3.75615	0.00194203	0.0665891	-1.18406	UP
ENSMUST00000140956.8	1.13428	-0.325941	3.75383	0.00195122	0.0666953	-1.18653	UP
ENSMUST00000012161.5	0.695542	4.23953	3.88919	0.00148212	0.0554551	-1.20228	UP
ENSMUST00000035278.7	0.837077	0.933951	3.72322	0.00207666	0.069041	-1.20314	UP
ENSMUST00000212933.2	0.727506	2.40715	3.75937	0.00192937	0.0663631	-1.20761	UP
ENSMUST00000239473.2	-0.600713	7.45603	-4.15792	0.000861301	0.0395283	-1.2154	DOWN
ENSMUST00000186894.7	-0.746373	3.23449	-3.79232	0.00180431	0.0632548	-1.2159	DOWN
ENSMUST00000145828.8	-1.44963	-0.142376	-3.73702	0.00201913	0.0683048	-1.2182	DOWN
ENSMUST00000019199.14	-0.226407	8.96124	-4.28937	0.000661753	0.0329012	-1.22709	NOT
ENSMUST00000029679.4	0.716332	1.86041	3.72695	0.00206097	0.0689918	-1.22798	UP
ENSMUST00000045791.11	-0.190711	10.0361	-4.3878	0.000543765	0.0288057	-1.23174	NOT
ENSMUST00000177094.8	0.444196	4.27339	3.87627	0.00152148	0.0560966	-1.23199	NOT
ENSMUST00000100026.10	-0.274619	6.47321	-4.06648	0.00103543	0.0440684	-1.23713	NOT
ENSMUST00000100530.8	-0.389039	6.74396	-4.08493	0.000997621	0.0433015	-1.24428	NOT
ENSMUST00000016396.8	0.448033	4.42656	3.88381	0.00149839	0.0558212	-1.24438	NOT
ENSMUST00000067757.11	-0.298813	6.78463	-4.08945	0.000988586	0.0430231	-1.2447	NOT
ENSMUST00000130726.2	-0.857851	2.32466	-3.72507	0.00206887	0.0689918	-1.25096	DOWN
ENSMUST00000152097.2	-1.09102	-0.439702	-3.72564	0.00206648	0.0689918	-1.2531	DOWN
ENSMUST00000028062.8	1.57843	1.00338	3.69468	0.00220093	0.0718163	-1.25524	UP
ENSMUST00000145738.8	-0.832635	3.95328	-3.8229	0.00169561	0.0602815	-1.2566	DOWN
ENSMUST00000232450.2	-0.445262	4.27632	-3.85479	0.00158926	0.0580735	-1.25706	NOT
ENSMUST00000208472.2	1.20821	-0.779807	3.72746	0.0020588	0.0689918	-1.25887	UP
ENSMUST00000150685.8	1.39762	-1.40748	3.75507	0.0019463	0.0666532	-1.26247	UP
ENSMUST00000136971.5	-0.579476	5.34676	-3.94593	0.00132113	0.0507292	-1.26647	NOT
ENSMUST00000067924.13	1.4696	1.09188	3.68869	0.00222792	0.0720978	-1.26758	UP
ENSMUST00000205633.2	1.65163	-1.62435	3.76006	0.00192667	0.0663631	-1.2728	UP
ENSMUST00000054050.5	-0.582218	3.35681	-3.76996	0.00188827	0.0655679	-1.27783	NOT
ENSMUST00000049460.12	0.340047	11.2244	4.48776	0.000445868	0.0252254	-1.28286	NOT
ENSMUST00000106644.9	0.53486	4.88877	3.90636	0.00143142	0.0539271	-1.28541	NOT
ENSMUST00000172435.8	1.0523	1.84363	3.69582	0.00219585	0.0717674	-1.28578	UP
ENSMUST00000043839.5	-0.235026	9.97347	-4.35396	0.00058169	0.0302198	-1.28729	NOT
ENSMUST00000034464.8	0.487068	3.91153	3.81315	0.00172953	0.0612882	-1.29554	NOT
ENSMUST00000152174.2	-1.25651	-0.9919	-3.72556	0.00206679	0.0689918	-1.29578	DOWN
ENSMUST00000192145.6	-0.784674	3.87603	-3.79458	0.00179606	0.0631544	-1.30063	DOWN
ENSMUST00000210947.2	-0.99358	2.15301	-3.68978	0.00222302	0.0720852	-1.30298	DOWN
ENSMUST00000026663.8	-0.627847	3.3696	-3.75652	0.0019406	0.0665891	-1.30482	DOWN
ENSMUST00000147927.8	0.930559	1.51369	3.6732	0.00229936	0.0735393	-1.30979	UP
ENSMUST00000138502.2	0.614408	3.77071	3.79441	0.00179666	0.0631544	-1.31049	UP
ENSMUST00000074856.13	0.553196	3.30761	3.75765	0.00193614	0.0665261	-1.31291	NOT
ENSMUST00000093043.7	0.589631	2.83992	3.72558	0.00206671	0.0689918	-1.31585	UP
ENSMUST00000221631.2	-1.03504	1.16336	-3.6575	0.00237411	0.0749079	-1.32129	DOWN
ENSMUST00000015719.16	0.34691	6.4493	4.02865	0.0011176	0.0459484	-1.32145	NOT
ENSMUST00000055159.8	0.436859	5.63924	3.95712	0.00129153	0.0504525	-1.32197	NOT
ENSMUST00000019967.16	0.56097	5.77451	3.96978	0.00125886	0.0496493	-1.32243	NOT
ENSMUST00000068878.14	0.83707	5.67948	3.96156	0.00127998	0.0501209	-1.3228	UP
ENSMUST00000131670.3	0.98773	0.370838	3.6566	0.00237848	0.0749165	-1.32503	UP
ENSMUST00000116598.10	1.74973	2.47477	3.6969	0.00219102	0.071681	-1.33332	UP
ENSMUST00000130057.2	0.959867	0.282185	3.65235	0.00239916	0.075264	-1.33444	UP
ENSMUST00000016144.12	0.442974	5.21158	3.91154	0.00141644	0.0535884	-1.33478	NOT
ENSMUST00000219757.2	-1.01119	1.45652	-3.65349	0.0023936	0.0751612	-1.33508	DOWN
ENSMUST00000144779.2	0.476335	4.40165	3.83515	0.00165392	0.0597588	-1.33693	NOT
ENSMUST00000156836.2	-1.22096	0.595416	-3.64917	0.00241478	0.0753878	-1.33827	DOWN
ENSMUST00000171263.8	-0.466103	5.73814	-3.94568	0.0013218	0.0507292	-1.34309	NOT
ENSMUST00000193687.7	-0.624316	3.2192	-3.7266	0.00206244	0.0689918	-1.34376	DOWN
ENSMUST00000032597.12	0.59735	2.8346	3.71062	0.00213063	0.0702856	-1.34411	UP
ENSMUST00000161279.8	-0.366959	7.51007	-4.10167	0.000964543	0.0422392	-1.34518	NOT
ENSMUST00000143489.2	-1.61595	-1.54401	-3.72597	0.00206505	0.0689918	-1.34685	DOWN
ENSMUST00000001126.4	-0.307746	7.78338	-4.12421	0.000921739	0.0411509	-1.34898	NOT
ENSMUST00000146441.8	0.822444	2.0749	3.66928	0.00231781	0.0738414	-1.3511	UP
ENSMUST00000218545.2	1.76237	-1.73323	3.7151	0.00211126	0.0699082	-1.35209	UP
ENSMUST00000147377.8	-0.77407	1.92568	-3.6565	0.00237895	0.0749165	-1.3533	DOWN
ENSMUST00000235957.2	-0.484653	5.50343	-3.91725	0.00140016	0.0531153	-1.35608	NOT
ENSMUST00000163168.9	0.235197	6.85113	4.04555	0.0010801	0.0452675	-1.35609	NOT
ENSMUST00000032143.8	-0.176077	8.29864	-4.16471	0.000849631	0.0392612	-1.36118	NOT
ENSMUST00000111994.10	-0.371259	7.26739	-4.07089	0.00102628	0.0438665	-1.36496	NOT
ENSMUST00000219577.2	-1.1323	3.37729	-3.72	0.00209031	0.0693545	-1.36622	DOWN
ENSMUST00000040735.12	0.464622	5.20358	3.89442	0.00146647	0.0549951	-1.3675	NOT
ENSMUST00000192639.6	0.530824	3.89352	3.77422	0.00187195	0.0650702	-1.36972	NOT
ENSMUST00000089184.11	-0.834027	3.44009	-3.72325	0.00207654	0.069041	-1.37417	DOWN
ENSMUST00000056946.8	-0.273068	6.46016	-3.9947	0.00119697	0.0481339	-1.38008	NOT
ENSMUST00000194649.2	0.673069	2.14402	3.6542	0.00239014	0.0751387	-1.38446	UP
ENSMUST00000142033.8	0.819169	2.08707	3.6485	0.00241809	0.0753878	-1.39122	UP
ENSMUST00000033325.9	-0.287678	6.89335	-4.02659	0.00112226	0.0459484	-1.39131	NOT
ENSMUST00000024851.10	1.67477	0.148029	3.62063	0.00255944	0.0780238	-1.39176	UP
ENSMUST00000237853.2	-0.323933	6.91014	-4.02707	0.00112117	0.0459484	-1.39234	NOT
ENSMUST00000080813.5	0.676346	4.61654	3.8272	0.00168084	0.0600563	-1.39375	UP
ENSMUST00000144215.3	-1.22773	0.503083	-3.61828	0.00257175	0.0781385	-1.39392	DOWN
ENSMUST00000087623.13	0.981548	1.77063	3.6328	0.00249674	0.0767836	-1.39872	UP
ENSMUST00000107904.3	1.209	1.82701	3.63288	0.00249629	0.0767836	-1.40243	UP
ENSMUST00000077856.13	0.558614	4.73575	3.83178	0.0016653	0.0597866	-1.4061	NOT
ENSMUST00000062069.6	-0.285317	10.5675	-4.35207	0.000583877	0.0302198	-1.40791	NOT
ENSMUST00000027297.11	0.317995	6.7996	4.01615	0.00114618	0.0464954	-1.40798	NOT
ENSMUST00000110294.2	-0.526401	3.93029	-3.74776	0.0019755	0.0672845	-1.40826	NOT
ENSMUST00000049260.7	1.3283	-0.00111128	3.61369	0.00259591	0.0785188	-1.40849	UP
ENSMUST00000002298.7	1.55794	0.388666	3.60848	0.00262367	0.0787676	-1.40853	UP
ENSMUST00000100572.10	-0.232277	7.27628	-4.04992	0.00107063	0.0450407	-1.41242	NOT
ENSMUST00000055539.11	1.11697	1.12628	3.60869	0.0026225	0.0787676	-1.41357	UP
ENSMUST00000036759.11	0.369089	6.73681	4.0069	0.00116782	0.0471352	-1.41633	NOT
ENSMUST00000134804.2	-0.610873	3.37596	-3.69796	0.00218629	0.0716694	-1.42053	DOWN
ENSMUST00000064637.11	-0.265537	6.94425	-4.01612	0.00114625	0.0464954	-1.42218	NOT
ENSMUST00000066427.11	0.939386	2.89629	3.67427	0.00229436	0.0735225	-1.42332	UP
ENSMUST00000145716.2	0.811655	1.91562	3.62378	0.00254304	0.0778427	-1.42497	UP
ENSMUST00000156878.8	-0.710262	2.13078	-3.62509	0.00253626	0.0777076	-1.42676	DOWN
ENSMUST00000228655.2	-0.630186	3.95772	-3.73929	0.00200984	0.0680607	-1.42688	DOWN
ENSMUST00000040340.16	-0.304067	6.7893	-3.99774	0.00118963	0.0478978	-1.43109	NOT
ENSMUST00000181935.2	0.748801	2.13823	3.62899	0.00251619	0.0772368	-1.43183	UP
ENSMUST00000068449.4	-0.411087	5.50897	-3.88041	0.00150874	0.0559409	-1.43414	NOT
ENSMUST00000159092.2	0.860633	1.97097	3.61991	0.00256323	0.0780238	-1.43644	UP
ENSMUST00000058407.6	0.472317	4.36338	3.78035	0.00184875	0.0644002	-1.439	NOT
ENSMUST00000056355.9	0.598221	2.97745	3.67038	0.00231264	0.0737484	-1.43917	UP
ENSMUST00000209579.2	-0.997281	1.52241	-3.59675	0.00268715	0.0799421	-1.44142	DOWN
ENSMUST00000095062.10	-0.355149	5.45957	-3.87281	0.00153218	0.0563643	-1.44162	NOT
ENSMUST00000111490.2	-0.762691	2.82813	-3.64638	0.00242854	0.0753928	-1.44863	DOWN
ENSMUST00000238348.2	0.773122	2.74979	3.65123	0.00240465	0.075364	-1.4497	UP
ENSMUST00000080437.13	0.538279	6.29143	3.94983	0.00131073	0.0505559	-1.45559	NOT
ENSMUST00000114086.8	-0.575215	4.31321	-3.75466	0.00194796	0.0666532	-1.45746	NOT
ENSMUST00000067853.6	-0.401014	12.6586	-4.55024	0.000394042	0.0232138	-1.45887	NOT
ENSMUST00000220314.2	-0.532457	3.481	-3.68621	0.00223925	0.0721646	-1.45982	NOT
ENSMUST00000129629.2	-1.30994	-0.771079	-3.61363	0.00259624	0.0785188	-1.45993	DOWN
ENSMUST00000108754.8	1.74746	0.657031	3.57828	0.00279033	0.0818978	-1.4606	UP
ENSMUST00000078686.8	-0.387217	5.63639	-3.87938	0.00151192	0.0559749	-1.46064	NOT
ENSMUST00000068415.11	-0.407332	6.01778	-3.9137	0.00141025	0.0534365	-1.46095	NOT
ENSMUST00000102926.5	0.411948	4.94647	3.82143	0.00170066	0.0603956	-1.46508	NOT
ENSMUST00000223494.2	0.566759	6.37725	3.9526	0.00130341	0.0505559	-1.4653	NOT
ENSMUST00000230063.2	-0.475261	4.09779	-3.73238	0.00203831	0.0687808	-1.46805	NOT
ENSMUST00000042158.13	2.04676	-1.97954	3.64933	0.00241397	0.0753878	-1.47393	UP
ENSMUST00000109691.4	-0.382679	5.94834	-3.90098	0.0014471	0.0544082	-1.47469	NOT
ENSMUST00000232437.2	1.70791	-0.789089	3.59403	0.00270212	0.0801695	-1.47569	UP
ENSMUST00000141536.8	0.888061	1.13548	3.57216	0.0028254	0.0822493	-1.48012	UP
ENSMUST00000134656.8	-0.729085	2.88731	-3.63389	0.00249118	0.0767564	-1.48053	DOWN
ENSMUST00000095342.11	0.362153	5.49328	3.86395	0.00156	0.0573234	-1.4822	NOT
ENSMUST00000235468.2	-1.38061	-1.5632	-3.63714	0.00247472	0.0763929	-1.48294	DOWN
ENSMUST00000168574.9	-0.28696	6.19094	-3.91986	0.00139276	0.0529981	-1.48324	NOT
ENSMUST00000046212.2	0.40961	5.06239	3.82316	0.0016947	0.0602815	-1.48363	NOT
ENSMUST00000124402.2	1.28521	0.101052	3.56548	0.00286415	0.0827166	-1.48871	UP
ENSMUST00000036606.14	-0.341931	6.613	-3.95218	0.0013045	0.0505559	-1.49171	NOT
ENSMUST00000002303.12	0.528014	3.47951	3.67599	0.00228636	0.0733377	-1.4972	NOT
ENSMUST00000066285.6	0.752672	3.01721	3.64048	0.00245792	0.0760887	-1.50304	UP
ENSMUST00000137435.2	1.24242	-0.133661	3.55944	0.00289967	0.0834647	-1.50586	UP
ENSMUST00000171376.8	1.50617	2.01089	3.58323	0.0027623	0.0813662	-1.50873	UP
ENSMUST00000027989.13	0.922917	2.09957	3.58682	0.00274215	0.081037	-1.50889	UP
ENSMUST00000186835.2	-0.714533	2.52732	-3.59766	0.00268218	0.0799421	-1.5122	DOWN
ENSMUST00000159823.8	-0.91334	2.06731	-3.5757	0.00280506	0.0819194	-1.51221	DOWN
ENSMUST00000043848.11	0.554647	3.21223	3.6481	0.00242007	0.0753878	-1.51333	NOT
ENSMUST00000076364.6	0.44933	6.47776	3.93697	0.00134531	0.0514511	-1.51349	NOT
ENSMUST00000168902.8	-0.525675	4.89118	-3.77865	0.00185516	0.0645547	-1.51763	NOT
ENSMUST00000072836.7	-0.781595	3.16342	-3.63088	0.00250649	0.0770111	-1.51778	DOWN
ENSMUST00000107619.3	1.46303	0.781193	3.5468	0.00297545	0.0846248	-1.51783	UP
ENSMUST00000139584.2	0.518214	2.66279	3.60967	0.00261727	0.0787676	-1.51823	NOT
ENSMUST00000102632.7	-0.223196	8.47173	-4.10128	0.000965302	0.0422392	-1.52044	NOT
ENSMUST00000041139.9	-0.279994	8.03782	-4.06212	0.00104459	0.0442858	-1.52103	NOT
ENSMUST00000136090.8	-1.51185	0.313415	-3.54733	0.00297222	0.0846248	-1.52156	DOWN
ENSMUST00000043675.9	0.395413	4.44589	3.7458	0.00198337	0.0674429	-1.52211	NOT
ENSMUST00000102825.4	1.19533	4.99195	3.79704	0.00178707	0.0629872	-1.52333	UP
ENSMUST00000114882.9	0.933735	2.01869	3.57553	0.00280604	0.0819194	-1.5236	UP
ENSMUST00000231753.2	0.654628	2.07039	3.57695	0.00279789	0.0819002	-1.52416	UP
ENSMUST00000112512.8	0.586476	3.58467	3.67052	0.00231198	0.0737484	-1.52479	UP
ENSMUST00000101004.9	1.2222	2.17496	3.58092	0.00277533	0.0816656	-1.52702	UP
ENSMUST00000005173.11	-0.471858	4.49451	-3.73628	0.0020222	0.0683382	-1.5307	NOT
ENSMUST00000022499.13	0.497466	3.25205	3.64054	0.00245764	0.0760887	-1.53307	NOT
ENSMUST00000006587.7	0.30405	5.97811	3.88171	0.00150476	0.05592	-1.53441	NOT
ENSMUST00000097609.3	0.804764	2.15654	3.57414	0.00281402	0.0820793	-1.53731	UP
ENSMUST00000061739.9	1.26876	1.40209	3.54629	0.00297852	0.0846248	-1.53839	UP
ENSMUST00000112201.8	-1.1067	1.32649	-3.53882	0.00302425	0.0854026	-1.53948	DOWN
ENSMUST00000032909.9	-0.210979	9.26831	-4.16339	0.000851892	0.0392612	-1.54092	NOT
ENSMUST00000030851.7	0.455952	3.47128	3.65005	0.00241045	0.0753878	-1.5461	NOT
ENSMUST00000146497.9	1.34883	3.24764	3.63435	0.00248884	0.0767562	-1.54707	UP
ENSMUST00000115450.8	0.870759	2.36141	3.57771	0.0027936	0.0819002	-1.54957	UP
ENSMUST00000020692.7	-0.272382	7.82181	-4.02626	0.00112301	0.0459484	-1.55564	NOT
ENSMUST00000185034.8	0.769037	1.06202	3.52873	0.0030872	0.0860692	-1.55645	UP
ENSMUST00000028241.7	0.413218	4.01343	3.68788	0.00223164	0.0721469	-1.5596	NOT
ENSMUST00000067298.5	0.412375	4.18461	3.70172	0.0021696	0.0711933	-1.56246	NOT
ENSMUST00000111303.2	0.968901	1.4389	3.53371	0.00305597	0.0855674	-1.56334	UP
ENSMUST00000097950.9	-0.522308	4.32508	-3.70209	0.00216798	0.0711933	-1.56616	NOT
ENSMUST00000154184.5	0.978147	1.28175	3.5278	0.00309305	0.086159	-1.56664	UP
ENSMUST00000173035.2	-1.80553	-1.19295	-3.56723	0.00285396	0.0826263	-1.56805	DOWN
ENSMUST00000021719.7	0.574002	3.34802	3.62684	0.00252724	0.0775037	-1.57418	NOT
ENSMUST00000129909.8	0.641332	1.83549	3.53991	0.00301758	0.0853189	-1.57571	UP
ENSMUST00000045243.15	-0.302128	6.4136	-3.89092	0.00147692	0.0553239	-1.58143	NOT
ENSMUST00000239400.2	-1.20409	1.5289	-3.51873	0.00315083	0.0875456	-1.58318	DOWN
ENSMUST00000223290.2	-0.432105	5.72802	-3.82634	0.00168379	0.0600563	-1.58385	NOT
ENSMUST00000124996.8	0.911495	1.05946	3.51279	0.00318928	0.0881092	-1.58541	UP
ENSMUST00000074546.7	0.677654	3.81302	3.65797	0.00237183	0.0749079	-1.58676	UP
ENSMUST00000172400.2	-1.50881	-1.12358	-3.54994	0.00295645	0.0843762	-1.58778	DOWN
ENSMUST00000071935.7	0.42499	5.75149	3.83332	0.00166007	0.0597588	-1.59248	NOT
ENSMUST00000046390.14	-0.445917	5.11994	-3.76345	0.00191341	0.0661607	-1.59519	NOT
ENSMUST00000175849.3	0.325629	4.90123	3.75136	0.00196106	0.0669616	-1.59593	NOT
ENSMUST00000076249.6	1.40623	2.56204	3.56429	0.00287112	0.0827881	-1.59674	UP
ENSMUST00000160457.10	1.34538	0.151771	3.50235	0.00325794	0.0893116	-1.59687	UP
ENSMUST00000138864.2	-1.76219	-0.130654	-3.51132	0.00319889	0.0881903	-1.59765	DOWN
ENSMUST00000188111.7	0.920056	2.42244	3.55487	0.00292685	0.0839525	-1.59931	UP
ENSMUST00000077548.12	-0.539043	5.88381	-3.83038	0.00167001	0.0598904	-1.60071	NOT
ENSMUST00000071728.11	0.794117	2.73825	3.56865	0.0028457	0.0826263	-1.60725	UP
ENSMUST00000100799.9	0.667327	4.62402	3.72059	0.00208783	0.069342	-1.60822	UP
ENSMUST00000020504.6	0.340299	5.08442	3.76161	0.0019206	0.0662699	-1.61053	NOT
ENSMUST00000067778.8	0.692772	5.95053	3.84315	0.00162727	0.0589373	-1.6112	UP
ENSMUST00000082405.1	0.496935	7.17084	3.94587	0.00132127	0.0507292	-1.61792	NOT
ENSMUST00000043845.14	0.710674	2.85995	3.56757	0.00285197	0.0826263	-1.62398	UP
ENSMUST00000096575.5	-0.408077	4.72389	-3.71098	0.00212908	0.0702856	-1.62569	NOT
ENSMUST00000176080.2	1.46931	-0.96731	3.50496	0.00324062	0.0889857	-1.63281	UP
ENSMUST00000025639.7	0.304983	5.46658	3.78174	0.00184354	0.0642868	-1.64215	NOT
ENSMUST00000093169.3	-0.911442	1.30526	-3.482	0.00339616	0.0918728	-1.64273	DOWN
ENSMUST00000110663.9	0.692635	3.70059	3.61998	0.00256285	0.0780238	-1.64338	UP
ENSMUST00000152454.8	-1.32849	0.30473	-3.47316	0.00345798	0.0928507	-1.64912	DOWN
ENSMUST00000099706.9	2.11419	-0.686728	3.48508	0.00337485	0.0913796	-1.64949	UP
ENSMUST00000215129.2	0.820802	1.63996	3.49207	0.00332708	0.0905263	-1.65198	UP
ENSMUST00000111265.9	-0.386492	6.28277	-3.84174	0.00163195	0.0590417	-1.65547	NOT
ENSMUST00000026661.4	1.1387	1.1088	3.47437	0.00344943	0.0927906	-1.65698	UP
ENSMUST00000199832.2	1.43169	-0.248723	3.47067	0.00347563	0.0931014	-1.65987	UP
ENSMUST00000054536.11	0.838246	1.89155	3.49706	0.00329334	0.0899064	-1.66064	UP
ENSMUST00000099207.5	-0.765614	3.15752	-3.55239	0.00294168	0.0841573	-1.66974	DOWN
ENSMUST00000109877.10	-0.758357	2.49462	-3.51276	0.00318945	0.0881092	-1.66984	DOWN
ENSMUST00000042729.16	0.625521	4.98333	3.72371	0.00207459	0.069041	-1.67023	UP
ENSMUST00000120595.8	1.42411	1.46297	3.4749	0.00344572	0.0927906	-1.67304	UP
ENSMUST00000178925.8	-0.486522	3.89718	-3.6111	0.00260964	0.0787048	-1.6733	NOT
ENSMUST00000030010.4	-0.324167	8.63009	-4.03827	0.0010961	0.0455286	-1.67513	NOT
ENSMUST00000195717.6	-0.349711	6.80952	-3.87845	0.00151477	0.0559749	-1.67561	NOT
ENSMUST00000079424.11	-0.734851	4.79823	-3.68671	0.00223695	0.0721646	-1.67789	DOWN
ENSMUST00000183548.3	1.91855	0.522604	3.45306	0.00360283	0.0951112	-1.68171	UP
ENSMUST00000114217.3	-0.536193	5.1173	-3.71802	0.00209878	0.0695649	-1.68177	NOT
ENSMUST00000032934.12	0.395572	8.54786	4.03364	0.0011064	0.0457822	-1.68364	NOT
ENSMUST00000137063.2	0.94316	1.57976	3.47279	0.00346061	0.0928507	-1.68402	UP
ENSMUST00000155744.8	2.01012	2.05155	3.49078	0.00333581	0.0906886	-1.68432	UP
ENSMUST00000006435.8	0.266375	7.62921	3.95154	0.0013062	0.0505559	-1.68441	NOT
ENSMUST00000227359.2	-0.718456	1.4566	-3.46313	0.00352949	0.0937788	-1.68546	DOWN
ENSMUST00000000574.3	-0.231556	6.78543	-3.87284	0.00153211	0.0563643	-1.68583	NOT
ENSMUST00000085425.6	1.04231	2.24806	3.49779	0.00328844	0.0899064	-1.69105	UP
ENSMUST00000028487.10	0.642052	2.64314	3.51782	0.00315673	0.0875613	-1.69307	UP
ENSMUST00000034150.10	-0.345221	6.61471	-3.85253	0.00159656	0.0582755	-1.69388	NOT
ENSMUST00000032891.15	-0.454359	5.31699	-3.73209	0.00203949	0.0687808	-1.69453	NOT
ENSMUST00000053413.12	-0.377258	4.82076	-3.68496	0.00224495	0.0722215	-1.69735	NOT
ENSMUST00000133744.8	-1.07752	0.787314	-3.44355	0.00367342	0.0962777	-1.69878	DOWN
ENSMUST00000020640.8	0.474043	5.04469	3.71398	0.00211612	0.0699982	-1.70012	NOT
ENSMUST00000038580.7	0.529799	6.32627	3.83193	0.00166477	0.0597866	-1.70062	NOT
ENSMUST00000105716.9	-0.449637	5.7128	-3.76665	0.00190101	0.0658015	-1.70079	NOT
ENSMUST00000233916.2	1.01522	1.11783	3.44376	0.00367185	0.0962777	-1.71288	UP
ENSMUST00000219340.2	0.726828	1.06096	3.44076	0.0036944	0.0965872	-1.71569	UP
ENSMUST00000111080.8	0.303841	5.42797	3.74111	0.00200239	0.0679488	-1.71676	NOT
ENSMUST00000216594.2	1.54555	-0.538583	3.44021	0.00369859	0.0965872	-1.72018	UP
ENSMUST00000131071.2	-0.520144	2.87822	-3.51018	0.00320629	0.0881903	-1.7216	NOT
ENSMUST00000038259.13	-0.449532	6.59593	-3.83467	0.00165555	0.0597588	-1.72405	NOT
ENSMUST00000038398.7	0.334945	6.52876	3.83308	0.00166088	0.0597588	-1.73208	NOT
ENSMUST00000127626.8	-1.27467	-0.407497	-3.43571	0.00373272	0.0971336	-1.73242	DOWN
ENSMUST00000221825.2	0.622148	3.19872	3.53384	0.00305516	0.0855674	-1.73423	UP
ENSMUST00000030401.14	0.370979	4.48412	3.6394	0.00246337	0.0761588	-1.74117	NOT
ENSMUST00000221100.2	-0.498683	3.77854	-3.56563	0.00286328	0.0827166	-1.74331	NOT
ENSMUST00000096014.5	0.469856	3.56984	3.55578	0.00292138	0.0838689	-1.74632	NOT
ENSMUST00000081940.11	0.88803	2.78106	3.4991	0.00327964	0.0897564	-1.74674	UP
ENSMUST00000061856.6	-0.482697	3.56207	-3.54454	0.00298917	0.0847766	-1.75071	NOT
ENSMUST00000107682.2	0.758214	3.61895	3.55873	0.00290389	0.0835128	-1.75078	UP
ENSMUST00000173788.2	1.03011	3.9566	3.58742	0.00273877	0.081037	-1.75184	UP
ENSMUST00000130670.2	-1.64753	0.2666	-3.414	0.00390186	0.100263	-1.75209	DOWN
ENSMUST00000050273.9	0.390294	4.32264	3.61719	0.00257747	0.0781674	-1.75538	NOT
ENSMUST00000162557.2	-0.55612	3.75547	-3.55339	0.00293571	0.0840596	-1.76187	NOT
ENSMUST00000216309.2	-0.888489	0.408432	-3.4069	0.00395883	0.101409	-1.76205	DOWN
ENSMUST00000237945.2	1.20543	0.957786	3.41322	0.00390804	0.100343	-1.7621	UP
ENSMUST00000021158.4	0.381554	4.88829	3.66719	0.00232769	0.0739406	-1.76273	NOT
ENSMUST00000070577.7	-1.60821	-0.522733	-3.42006	0.00385391	0.0994697	-1.76462	DOWN
ENSMUST00000034272.9	0.42124	4.31895	3.61067	0.00261198	0.0787048	-1.76803	NOT
ENSMUST00000218789.2	-0.568452	4.1694	-3.58539	0.00275015	0.0810811	-1.76924	NOT
ENSMUST00000236215.2	-1.23195	2.3363	-3.44767	0.00364267	0.0958546	-1.76926	DOWN
ENSMUST00000110987.9	-0.691587	2.99437	-3.48821	0.00335338	0.0910154	-1.77427	DOWN
ENSMUST00000031445.5	0.353317	5.01416	3.67341	0.00229839	0.0735393	-1.77449	NOT
ENSMUST00000126519.2	1.30467	-2.03374	3.45637	0.00357857	0.0945468	-1.77777	UP
ENSMUST00000073787.7	0.353794	4.97522	3.66781	0.00232475	0.0739189	-1.77813	NOT
ENSMUST00000234422.2	-0.848102	3.21464	-3.4971	0.00329304	0.0899064	-1.78304	DOWN
ENSMUST00000177005.8	0.303517	6.28764	3.78479	0.00183216	0.0640068	-1.78655	NOT
ENSMUST00000064922.7	-0.349937	8.17937	-3.94189	0.00133198	0.0510008	-1.78989	NOT
ENSMUST00000182023.2	1.33271	0.141433	3.39094	0.0040899	0.103507	-1.79006	UP
ENSMUST00000139249.9	1.60042	-0.161583	3.38934	0.00410328	0.103566	-1.79602	UP
ENSMUST00000063496.14	0.60706	3.01372	3.48745	0.00335858	0.0910813	-1.79834	UP
ENSMUST00000151238.8	1.2273	-0.426339	3.39011	0.00409683	0.103507	-1.80157	UP
ENSMUST00000074267.5	0.456374	5.15875	3.67154	0.00230718	0.0737175	-1.80713	NOT
ENSMUST00000038104.12	-0.547008	3.50996	-3.51059	0.00320361	0.0881903	-1.80739	NOT
ENSMUST00000230410.2	0.626845	2.51786	3.45036	0.00362269	0.0954819	-1.80772	UP
ENSMUST00000040924.9	-0.616695	4.52114	-3.59467	0.00269859	0.0801371	-1.81188	DOWN
ENSMUST00000082407.1	0.472692	5.55732	3.70696	0.00214655	0.0706488	-1.81198	NOT
ENSMUST00000112221.8	1.05862	0.82992	3.38163	0.00416839	0.104175	-1.8146	UP
ENSMUST00000130822.3	0.60073	3.53743	3.51809	0.00315498	0.0875613	-1.81634	UP
ENSMUST00000161754.2	0.660394	2.54754	3.44633	0.00365266	0.0959634	-1.81897	UP
ENSMUST00000187606.7	1.22471	-0.668758	3.3835	0.00415255	0.10409	-1.82032	UP
ENSMUST00000127722.2	1.62372	0.308868	3.37335	0.00423945	0.105469	-1.82057	UP
ENSMUST00000114225.8	0.518652	3.48735	3.51061	0.00320352	0.0881903	-1.82232	NOT
ENSMUST00000053871.5	-0.393127	5.40735	-3.67808	0.00227662	0.0730968	-1.82335	NOT
ENSMUST00000176308.2	0.425518	4.31788	3.57734	0.00279567	0.0819002	-1.83397	NOT
ENSMUST00000143842.2	-0.334566	5.36384	-3.66828	0.00232253	0.0739189	-1.83597	NOT
ENSMUST00000054002.4	-0.50547	5.78311	-3.70526	0.00215401	0.0708232	-1.83626	NOT
ENSMUST00000170953.3	0.542243	4.72022	3.61218	0.00260393	0.078645	-1.84225	NOT
ENSMUST00000102845.11	0.908603	1.93972	3.40198	0.00399882	0.101956	-1.84304	UP
ENSMUST00000130182.2	1.26411	-0.63334	3.36799	0.00428612	0.106307	-1.8447	UP
ENSMUST00000022904.8	0.255996	7.88616	3.8945	0.00146623	0.0549951	-1.84613	NOT
ENSMUST00000143817.8	0.704396	2.86607	3.45226	0.00360869	0.0951895	-1.84711	UP
ENSMUST00000019302.10	0.465293	4.61172	3.59834	0.00267846	0.0799421	-1.84858	NOT
ENSMUST00000167243.3	-0.866379	1.37173	-3.36915	0.00427593	0.106135	-1.85127	DOWN
ENSMUST00000164213.5	-0.543714	4.15086	-3.54194	0.00300509	0.085081	-1.85244	NOT
ENSMUST00000139296.8	-1.07987	-0.756433	-3.37032	0.00426572	0.105962	-1.85383	DOWN
ENSMUST00000162689.2	-0.810347	2.00278	-3.38837	0.0041114	0.103566	-1.85884	DOWN
ENSMUST00000114751.9	0.993867	0.160783	3.34832	0.00446167	0.109339	-1.86394	UP
ENSMUST00000170226.2	0.99196	-0.586744	3.35552	0.00439662	0.108149	-1.86486	UP
ENSMUST00000226253.2	-0.661039	2.42659	-3.40602	0.00396595	0.101503	-1.86722	DOWN
ENSMUST00000222276.2	0.587557	3.22632	3.46667	0.00350407	0.0934948	-1.86842	UP
ENSMUST00000109260.3	0.260582	7.2407	3.82644	0.00168345	0.0600563	-1.8704	NOT
ENSMUST00000038791.15	0.356753	6.32642	3.74461	0.00198818	0.0675362	-1.87567	NOT
ENSMUST00000131303.8	0.856454	0.195071	3.33469	0.00458747	0.111672	-1.88754	UP
ENSMUST00000180376.8	-0.388122	4.79162	-3.58579	0.00274791	0.0810811	-1.8898	NOT
ENSMUST00000108530.2	-0.398489	5.42198	-3.64548	0.00243303	0.0754607	-1.89103	NOT
ENSMUST00000176508.2	-1.23905	-1.2862	-3.36129	0.00434512	0.107365	-1.89512	DOWN
ENSMUST00000170391.2	0.681368	3.07454	3.44003	0.00369995	0.0965872	-1.89891	UP
ENSMUST00000231147.2	-1.53384	-1.83729	-3.38045	0.00417843	0.104346	-1.90116	DOWN
ENSMUST00000182911.2	1.4683	-1.77753	3.36485	0.0043136	0.106747	-1.90267	UP
ENSMUST00000173681.2	0.633356	2.25649	3.38451	0.00414394	0.104033	-1.90473	UP
ENSMUST00000098763.7	-0.219628	9.59436	-4.01433	0.0011504	0.0465797	-1.90694	NOT
ENSMUST00000000129.14	-0.45847	4.01612	-3.50193	0.00326075	0.089314	-1.90931	NOT
ENSMUST00000096232.6	-0.290843	6.82076	-3.75973	0.00192795	0.0663631	-1.92044	NOT
ENSMUST00000223982.2	-0.392519	6.05182	-3.68975	0.00222314	0.0720852	-1.92085	NOT
ENSMUST00000178124.3	-0.245244	8.18919	-3.87875	0.00151384	0.0559749	-1.92298	NOT
ENSMUST00000163433.8	-0.644847	2.72113	-3.39393	0.00406506	0.103084	-1.92345	DOWN
ENSMUST00000038038.8	0.99601	5.94284	3.68583	0.00224098	0.0721646	-1.92846	UP
ENSMUST00000073924.10	-0.540069	3.73493	-3.46661	0.00350456	0.0934948	-1.9288	NOT
ENSMUST00000193307.2	-1.20554	-1.06582	-3.33248	0.00460828	0.111982	-1.92967	DOWN
ENSMUST00000035766.13	-0.381485	5.12809	-3.59735	0.00268388	0.0799421	-1.93215	NOT
ENSMUST00000153103.8	0.624274	5.17966	3.61194	0.0026052	0.078645	-1.93252	UP
ENSMUST00000115099.9	-0.939169	2.37434	-3.3632	0.00432818	0.107027	-1.93783	DOWN
ENSMUST00000172979.4	1.67051	0.306351	3.30312	0.00489279	0.115163	-1.94336	UP
ENSMUST00000038287.7	1.55804	-0.073852	3.30093	0.00491465	0.115357	-1.94645	UP
ENSMUST00000005583.12	0.566585	3.16574	3.42163	0.00384152	0.0994697	-1.94671	NOT
ENSMUST00000038816.13	2.22793	0.840948	3.30623	0.00486182	0.115022	-1.94927	UP
ENSMUST00000109504.8	-0.41144	4.70812	-3.54347	0.00299571	0.0848888	-1.95735	NOT
ENSMUST00000220560.2	-0.866416	1.26144	-3.30332	0.00489072	0.115163	-1.96511	DOWN
ENSMUST00000220737.2	0.554696	5.92611	3.66448	0.00234061	0.0742792	-1.96726	NOT
ENSMUST00000148827.8	-0.937726	3.29636	-3.4056	0.00396938	0.101503	-1.9676	DOWN
ENSMUST00000137486.3	-0.310754	5.57863	-3.62223	0.00255108	0.0779435	-1.97064	NOT
ENSMUST00000023677.10	0.293666	5.25823	3.59807	0.00267992	0.0799421	-1.97197	NOT
ENSMUST00000022751.15	0.706208	2.88177	3.38704	0.00412265	0.103663	-1.97477	UP
ENSMUST00000142363.8	-0.775742	1.9435	-3.32128	0.00471481	0.113675	-1.9794	DOWN
ENSMUST00000127262.2	-1.44121	-1.27131	-3.30751	0.00484911	0.114931	-1.98104	DOWN
ENSMUST00000045229.7	0.309089	5.56965	3.62264	0.00254897	0.0779435	-1.98248	NOT
ENSMUST00000075723.7	0.342277	6.71415	3.72567	0.00206633	0.0689918	-1.98307	NOT
ENSMUST00000090511.4	-0.485741	4.93959	-3.5512	0.00294882	0.0842879	-1.98408	NOT
ENSMUST00000036418.10	1.16707	1.14884	3.29453	0.0049793	0.116182	-1.98559	UP
ENSMUST00000071718.12	0.616818	2.07716	3.3317	0.00461562	0.112024	-1.98641	UP
ENSMUST00000031565.15	-0.299325	8.88994	-3.90891	0.00142401	0.0537714	-1.98802	NOT
ENSMUST00000174372.3	0.392134	5.38109	3.60237	0.00265653	0.079536	-1.98825	NOT
ENSMUST00000106962.9	-0.90605	1.88463	-3.31259	0.00479913	0.114342	-1.98846	DOWN
ENSMUST00000033098.16	-0.455479	4.06227	-3.46395	0.00352358	0.0937609	-1.99309	NOT
ENSMUST00000006912.12	-0.200895	8.66516	-3.88449	0.00149632	0.0558212	-1.99874	NOT
ENSMUST00000215902.2	-0.410882	3.59511	-3.42055	0.00384999	0.0994697	-1.99949	NOT
ENSMUST00000147326.9	0.764059	1.88665	3.31314	0.00479379	0.114342	-2.00422	UP
ENSMUST00000215388.2	-1.79348	-1.2975	-3.29367	0.00498797	0.116182	-2.00696	DOWN
ENSMUST00000132641.8	0.959719	2.04281	3.31878	0.00473892	0.113969	-2.00875	UP
ENSMUST00000043447.10	-1.088	1.87799	-3.29861	0.00493795	0.115656	-2.0119	DOWN
ENSMUST00000200029.5	-0.746515	1.57108	-3.28809	0.00504516	0.117185	-2.01273	DOWN
ENSMUST00000162246.9	1.1796	1.00756	3.27543	0.00517714	0.119132	-2.01283	UP
ENSMUST00000131369.2	1.03652	-0.0701054	3.26088	0.00533304	0.120876	-2.01527	UP
ENSMUST00000072566.5	0.493433	3.7969	3.43785	0.00371641	0.0967858	-2.01609	NOT
ENSMUST00000212595.2	-0.480194	3.46865	-3.40008	0.00401435	0.102114	-2.01773	NOT
ENSMUST00000118010.2	-1.44812	-0.945712	-3.27282	0.00520469	0.119416	-2.02205	DOWN
ENSMUST00000223603.2	-1.08845	1.332	-3.27271	0.0052059	0.119416	-2.02218	DOWN
ENSMUST00000203982.2	0.653656	3.24446	3.38773	0.00411679	0.103595	-2.02518	UP
ENSMUST00000206625.2	-0.96422	0.0485761	-3.25498	0.00539757	0.121413	-2.0257	DOWN
ENSMUST00000231556.2	0.671798	2.45499	3.33224	0.00461048	0.111982	-2.02579	UP
ENSMUST00000032895.15	0.313261	4.8858	3.53452	0.00305091	0.0855674	-2.02715	NOT
ENSMUST00000178079.8	0.774729	2.82766	3.35613	0.00439108	0.108094	-2.02721	UP
ENSMUST00000230288.2	-0.496914	3.9989	-3.43954	0.00370366	0.0965929	-2.02858	NOT
ENSMUST00000062915.9	-0.570773	4.22216	-3.45792	0.00356728	0.0944131	-2.02947	NOT
ENSMUST00000109307.2	-1.35518	-0.356995	-3.25637	0.00538235	0.121325	-2.02975	DOWN
ENSMUST00000152712.2	-1.26862	-2.07912	-3.30211	0.00490289	0.115163	-2.03392	DOWN
ENSMUST00000021277.6	1.2697	0.810941	3.2582	0.00536229	0.121211	-2.03505	UP
ENSMUST00000087566.11	0.778095	3.65686	3.41707	0.00387745	0.0997137	-2.03517	UP
ENSMUST00000196343.2	-1.06551	0.277029	-3.24905	0.00546322	0.122133	-2.03548	DOWN
ENSMUST00000213053.2	0.538381	4.64202	3.50731	0.00322515	0.0886348	-2.03654	NOT
ENSMUST00000116578.8	0.267491	6.59981	3.68873	0.00222778	0.0720978	-2.03657	NOT
ENSMUST00000105459.2	-0.216566	9.1253	-3.9069	0.00142983	0.0539271	-2.0377	NOT
ENSMUST00000040917.14	0.391741	4.5323	3.49495	0.00330755	0.0901444	-2.03824	NOT
ENSMUST00000154237.8	0.606439	4.95138	3.53677	0.00303695	0.0855402	-2.03842	UP
ENSMUST00000032887.4	0.550945	3.06569	3.36501	0.0043122	0.106747	-2.04184	NOT
ENSMUST00000098486.4	0.491085	3.74831	3.41989	0.00385522	0.0994697	-2.04273	NOT
ENSMUST00000228187.2	1.06561	1.0873	3.26106	0.00533108	0.120876	-2.04286	UP
ENSMUST00000039443.14	-0.584549	3.55657	-3.39299	0.00407287	0.103202	-2.04339	NOT
ENSMUST00000123415.8	-0.903575	0.957707	-3.25167	0.00543416	0.121967	-2.04483	DOWN
ENSMUST00000090476.10	0.435422	4.43494	3.48145	0.00339995	0.0918994	-2.0468	NOT
ENSMUST00000181823.9	1.16631	0.579098	3.24456	0.00551345	0.122657	-2.05127	UP
ENSMUST00000038926.13	-1.23548	0.907677	-3.24526	0.0055056	0.122648	-2.05229	DOWN
ENSMUST00000134495.8	-1.33012	-1.32853	-3.26269	0.00531334	0.120826	-2.05412	DOWN
ENSMUST00000220854.2	0.991926	2.58196	3.32518	0.0046774	0.112982	-2.05581	UP
ENSMUST00000126610.2	0.681367	2.2162	3.30213	0.00490267	0.115163	-2.05632	UP
ENSMUST00000097593.9	1.14615	1.94157	3.28823	0.00504363	0.117185	-2.05671	UP
ENSMUST00000022057.9	-0.363617	6.80001	-3.68992	0.00222235	0.0720852	-2.05674	NOT
ENSMUST00000209265.2	-0.233684	9.45784	-3.92791	0.00137024	0.0522647	-2.0572	NOT
ENSMUST00000232031.2	1.35867	-0.430596	3.23579	0.005613	0.123947	-2.06101	UP
ENSMUST00000191212.7	-1.04796	-0.0563108	-3.23432	0.00562983	0.12415	-2.06168	DOWN
ENSMUST00000110191.10	1.33911	1.06303	3.24954	0.00545782	0.122133	-2.06242	UP
ENSMUST00000137318.2	0.389036	5.02335	3.5301	0.00307855	0.0859113	-2.06402	NOT
ENSMUST00000033342.7	0.482909	4.53909	3.47979	0.00341151	0.092136	-2.07083	NOT
ENSMUST00000239033.2	-1.29142	-0.929159	-3.23987	0.00556651	0.123502	-2.07376	DOWN
ENSMUST00000130471.2	-0.252653	6.56228	-3.66163	0.00235424	0.074424	-2.07424	NOT
ENSMUST00000106197.10	0.151172	9.00145	3.88107	0.00150674	0.0559302	-2.07516	NOT
ENSMUST00000164915.8	-1.11974	-0.817073	-3.23344	0.00563988	0.124166	-2.07961	DOWN
ENSMUST00000046506.7	-0.413621	4.63039	-3.47431	0.00344989	0.0927906	-2.08026	NOT
ENSMUST00000025646.3	0.419917	5.0561	3.52476	0.00311231	0.086622	-2.08147	NOT
ENSMUST00000107270.9	-0.729707	3.62157	-3.37419	0.00423214	0.105367	-2.08562	DOWN
ENSMUST00000148841.2	-1.31988	-2.44921	-3.28361	0.0050914	0.11782	-2.08631	DOWN
ENSMUST00000154475.2	0.471049	4.281	3.44644	0.00365181	0.0959634	-2.08738	NOT
ENSMUST00000001809.15	0.378804	6.0719	3.6144	0.00259217	0.0785188	-2.09357	NOT
ENSMUST00000182569.2	-0.90516	1.13221	-3.22792	0.00570379	0.124776	-2.09498	DOWN
ENSMUST00000064798.16	0.406736	3.88052	3.4044	0.00397907	0.101531	-2.09564	NOT
ENSMUST00000171030.9	1.60038	-0.973967	3.22159	0.00577781	0.125674	-2.09633	UP
ENSMUST00000067638.14	0.488741	5.60686	3.57039	0.00283563	0.0824166	-2.09676	NOT
ENSMUST00000054178.8	-0.239954	8.3876	-3.81108	0.00173682	0.0614165	-2.09704	NOT
ENSMUST00000097317.10	-1.07461	5.28112	-3.51694	0.00316239	0.0876443	-2.09717	DOWN
ENSMUST00000075641.10	0.499674	4.25763	3.43922	0.00370605	0.0965929	-2.09756	NOT
ENSMUST00000014913.11	0.417923	5.03025	3.51269	0.00318991	0.0881092	-2.10057	NOT
ENSMUST00000206846.2	-0.263315	8.27211	-3.79869	0.0017811	0.0628442	-2.101	NOT
ENSMUST00000004389.6	0.341922	5.30182	3.53706	0.00303517	0.0855402	-2.10363	NOT
ENSMUST00000205094.2	-1.05749	0.42788	-3.21022	0.00591331	0.126989	-2.10389	DOWN
ENSMUST00000090381.11	-1.92418	0.822966	-3.21239	0.00588712	0.12675	-2.10399	DOWN
ENSMUST00000035043.12	-0.393069	4.64424	-3.46378	0.0035248	0.0937609	-2.10405	NOT
ENSMUST00000106213.9	-0.486795	4.87643	-3.48504	0.00337515	0.0913796	-2.10415	NOT
ENSMUST00000060148.6	-0.684849	3.14456	-3.3276	0.00465439	0.112632	-2.10517	DOWN
ENSMUST00000101491.11	-0.670872	3.81104	-3.37901	0.00419073	0.104574	-2.10985	DOWN
ENSMUST00000058154.15	-0.406547	4.61398	-3.45759	0.00356965	0.0944131	-2.11089	NOT
ENSMUST00000061283.15	-0.221629	7.16891	-3.69711	0.00219008	0.071681	-2.11135	NOT
ENSMUST00000028948.5	0.725351	1.50072	3.23778	0.00559023	0.123708	-2.1119	UP
ENSMUST00000133023.2	1.5611	0.968747	3.21808	0.0058193	0.126061	-2.11402	UP
ENSMUST00000234214.2	0.81194	0.574916	3.20858	0.00593309	0.127247	-2.1143	UP
ENSMUST00000077755.11	0.177775	7.89238	3.7621	0.00191869	0.0662699	-2.11607	NOT
ENSMUST00000079758.9	2.12682	2.00584	3.25823	0.00536189	0.121211	-2.11643	UP
ENSMUST00000128953.2	-0.918559	0.0705301	-3.2008	0.00602782	0.128498	-2.11804	DOWN
ENSMUST00000121494.2	0.666995	3.24706	3.34003	0.00453775	0.110812	-2.11834	UP
ENSMUST00000207063.2	0.53125	3.83246	3.38886	0.0041073	0.103566	-2.11901	NOT
ENSMUST00000078756.7	0.532922	4.07851	3.41159	0.00392107	0.10052	-2.11912	NOT
ENSMUST00000107802.8	1.14028	0.699621	3.2074	0.0059473	0.127386	-2.12119	UP
ENSMUST00000039016.14	1.25124	0.46516	3.20058	0.00603056	0.128498	-2.12569	UP
ENSMUST00000143074.2	-0.395384	4.53054	-3.44186	0.0036861	0.096456	-2.1257	NOT
ENSMUST00000212396.2	-0.461543	3.73467	-3.36704	0.00429439	0.106432	-2.12622	NOT
ENSMUST00000044138.8	-0.290429	7.22391	-3.69228	0.00221171	0.0719278	-2.12915	NOT
ENSMUST00000091967.13	-0.361133	5.47611	-3.5318	0.00306792	0.0857501	-2.13207	NOT
ENSMUST00000176994.2	0.648225	1.83813	3.24053	0.00555899	0.123502	-2.13461	UP
ENSMUST00000108807.9	-0.314257	5.46791	-3.53005	0.00307892	0.0859113	-2.13488	NOT
ENSMUST00000088610.11	0.472567	3.22624	3.32764	0.00465402	0.112632	-2.13749	NOT
ENSMUST00000167107.10	-0.881059	2.07434	-3.24078	0.00555613	0.123502	-2.13918	DOWN
ENSMUST00000167364.9	-0.322666	5.06889	-3.48877	0.00334954	0.0909866	-2.13986	NOT
ENSMUST00000191645.3	-1.28758	-1.72609	-3.21799	0.0058204	0.126061	-2.14329	DOWN
ENSMUST00000091355.12	0.507489	4.13857	3.4046	0.00397743	0.101531	-2.14367	NOT
ENSMUST00000024984.7	-0.428411	5.84301	-3.55725	0.00291267	0.083692	-2.14806	NOT
ENSMUST00000135715.8	-0.96384	2.06699	-3.23327	0.00564185	0.124166	-2.15161	DOWN
ENSMUST00000020315.13	-0.231598	6.49753	-3.61723	0.00257725	0.0781674	-2.15321	NOT
ENSMUST00000112279.2	0.584874	2.59667	3.27254	0.00520768	0.119416	-2.15571	NOT
ENSMUST00000151454.2	-1.25672	-1.16403	-3.19332	0.00612043	0.129488	-2.15693	DOWN
ENSMUST00000138037.2	0.44778	5.55786	3.5356	0.00304422	0.0855674	-2.15726	NOT
ENSMUST00000048068.15	0.52648	4.87671	3.46937	0.00348483	0.0932718	-2.15813	NOT
ENSMUST00000034868.14	-0.569446	5.66491	-3.53218	0.00306553	0.0857501	-2.15932	NOT
ENSMUST00000122059.8	-0.444147	6.6115	-3.62125	0.00255623	0.0780238	-2.15943	NOT
ENSMUST00000126269.2	0.851344	1.01892	3.19394	0.00611264	0.129488	-2.16008	UP
ENSMUST00000046177.9	-0.614351	3.57169	-3.33303	0.00460307	0.111968	-2.16106	DOWN
ENSMUST00000164235.3	-0.853188	3.40523	-3.31396	0.00478575	0.114342	-2.16544	DOWN
ENSMUST00000102840.5	1.70305	-1.44839	3.18711	0.00619839	0.130716	-2.16766	UP
ENSMUST00000188681.7	0.63494	2.53786	3.26275	0.00531268	0.120826	-2.16776	UP
ENSMUST00000188685.7	-0.439929	3.52191	-3.32607	0.00466892	0.112901	-2.17156	NOT
ENSMUST00000113898.8	1.23174	0.587928	3.17554	0.00634613	0.132275	-2.17357	UP
ENSMUST00000234965.2	0.563684	2.48779	3.2555	0.00539183	0.121413	-2.17452	NOT
ENSMUST00000124053.2	-1.01783	1.71598	-3.20271	0.00600444	0.128191	-2.17632	DOWN
ENSMUST00000109122.8	-1.3165	0.531265	-3.16865	0.00643582	0.133408	-2.17715	DOWN
ENSMUST00000129449.3	-0.309637	7.00197	-3.64802	0.00242044	0.0753878	-2.17951	NOT
ENSMUST00000229353.2	-1.05657	0.518004	-3.16739	0.0064523	0.133581	-2.17971	DOWN
ENSMUST00000176028.2	1.29141	1.06191	3.18203	0.00626281	0.131196	-2.1843	UP
ENSMUST00000198107.2	1.53616	-2.69561	3.21671	0.00583552	0.126061	-2.18483	UP
ENSMUST00000074805.12	0.575462	3.64495	3.33643	0.00457121	0.111358	-2.18941	NOT
ENSMUST00000121006.2	-1.43633	0.847872	-3.16525	0.00648058	0.133913	-2.19039	DOWN
ENSMUST00000143965.8	-0.710548	2.21364	-3.22201	0.00577291	0.125674	-2.19092	DOWN
ENSMUST00000038863.9	0.468315	5.08819	3.47209	0.00346553	0.0929068	-2.19392	NOT
ENSMUST00000061455.9	0.34146	7.54694	3.69402	0.00220391	0.0718163	-2.19565	NOT
ENSMUST00000211187.2	0.386922	4.27518	3.39003	0.00409751	0.103507	-2.19715	NOT
ENSMUST00000103188.10	0.662697	2.28691	3.23127	0.00566491	0.12459	-2.1975	UP
ENSMUST00000102482.5	0.470719	4.3548	3.39748	0.00403566	0.102418	-2.19872	NOT
ENSMUST00000035232.13	-0.411375	6.54848	-3.59613	0.00269058	0.0799717	-2.20028	NOT
ENSMUST00000126070.9	0.569991	3.51004	3.31821	0.00474436	0.113969	-2.20228	NOT
ENSMUST00000112260.3	-0.796761	2.2769	-3.21843	0.00581509	0.126061	-2.20251	DOWN
ENSMUST00000166285.2	-0.929619	0.263322	-3.15053	0.00667774	0.136356	-2.20522	DOWN
ENSMUST00000030477.4	-0.317212	6.24189	-3.56735	0.00285327	0.0826263	-2.20529	NOT
ENSMUST00000026571.11	1.27974	2.89	3.26813	0.0052548	0.120077	-2.20593	UP
ENSMUST00000147343.8	-1.18988	-0.652599	-3.15323	0.00664103	0.135922	-2.20655	DOWN
ENSMUST00000227462.2	-0.799537	3.57874	-3.30708	0.00485341	0.114931	-2.20754	DOWN
ENSMUST00000033004.8	-0.317626	5.90316	-3.53521	0.00304664	0.0855674	-2.20758	NOT
ENSMUST00000094280.4	0.265593	6.44644	3.5888	0.00273108	0.0808825	-2.21175	NOT
ENSMUST00000041045.14	0.314609	7.18894	3.65411	0.00239059	0.0751387	-2.21265	NOT
ENSMUST00000155774.2	-0.787861	1.50014	-3.17567	0.00634451	0.132275	-2.21287	DOWN
ENSMUST00000175806.9	1.25279	1.4529	3.18038	0.00628388	0.131505	-2.21415	UP
ENSMUST00000236970.2	-0.40988	4.98752	-3.44218	0.00368375	0.096456	-2.21422	NOT
ENSMUST00000148507.2	-1.55851	-0.264378	-3.14462	0.00675849	0.137249	-2.21516	DOWN
ENSMUST00000035938.3	1.72341	-0.0781437	3.14412	0.00676541	0.137291	-2.21523	UP
ENSMUST00000025983.13	-1.09348	1.46189	-3.17089	0.00640656	0.132885	-2.21531	DOWN
ENSMUST00000023143.14	0.28103	7.5777	3.68597	0.00224032	0.0721646	-2.21643	NOT
ENSMUST00000110082.11	0.243734	7.14919	3.64781	0.00242149	0.0753878	-2.21732	NOT
ENSMUST00000067505.15	0.51999	3.05853	3.2734	0.00519859	0.119416	-2.21743	NOT
ENSMUST00000091706.14	-0.256886	7.19836	-3.64683	0.00242632	0.0753928	-2.2178	NOT
ENSMUST00000030464.14	-1.18749	1.59792	-3.17302	0.00637876	0.13256	-2.2189	DOWN
ENSMUST00000159249.2	-0.974941	0.418792	-3.14371	0.00677099	0.13732	-2.21917	DOWN
ENSMUST00000023294.15	0.472903	2.60145	3.23743	0.00559423	0.123708	-2.22241	NOT
ENSMUST00000201624.4	-0.280234	6.00993	-3.53774	0.00303093	0.0855175	-2.22357	NOT
ENSMUST00000034763.10	0.443235	4.28077	3.37608	0.0042159	0.105122	-2.22629	NOT
ENSMUST00000208417.2	1.02491	-0.424057	3.13572	0.00688199	0.139141	-2.22938	UP
ENSMUST00000190533.2	1.35742	-2.04366	3.1626	0.00651556	0.13419	-2.23197	UP
ENSMUST00000142643.2	0.617411	3.04994	3.26478	0.00529082	0.120562	-2.23337	UP
ENSMUST00000211365.2	0.791157	2.42285	3.21971	0.00579994	0.126039	-2.23624	UP
ENSMUST00000182304.8	-0.734681	2.62308	-3.22146	0.00577929	0.125674	-2.23717	DOWN
ENSMUST00000038275.11	-0.34659	8.0325	-3.70897	0.00213781	0.0704318	-2.23865	NOT
ENSMUST00000163119.8	-0.347986	4.68362	-3.40086	0.00400795	0.102109	-2.23867	NOT
ENSMUST00000036156.6	-0.282107	6.85215	-3.60588	0.00263758	0.079113	-2.23888	NOT
ENSMUST00000109210.8	0.601525	3.24823	3.27753	0.00515496	0.118872	-2.23929	UP
ENSMUST00000199518.2	1.17338	-0.0572697	3.12711	0.00700365	0.14082	-2.24414	UP
ENSMUST00000218977.2	0.620563	2.31459	3.20683	0.00595423	0.127451	-2.24669	UP
ENSMUST00000004892.7	0.727716	2.18221	3.19848	0.00605637	0.128797	-2.24815	UP
ENSMUST00000221219.2	-0.654968	2.63984	-3.21713	0.00583061	0.126061	-2.24946	DOWN
ENSMUST00000015950.12	0.35098	5.29258	3.4622	0.0035362	0.0938809	-2.2521	NOT
ENSMUST00000164963.8	-0.954744	0.730452	-3.12858	0.0069827	0.140657	-2.25395	DOWN
ENSMUST00000140597.8	0.643143	3.17811	3.26177	0.00532335	0.120876	-2.25879	UP
ENSMUST00000133112.2	-0.951669	2.436	-3.19636	0.00608265	0.129135	-2.2591	DOWN
ENSMUST00000178310.9	0.47726	4.98912	3.42887	0.00378518	0.0983428	-2.26051	NOT
ENSMUST00000139122.8	0.374139	5.3939	3.46757	0.00349763	0.0934948	-2.2616	NOT
ENSMUST00000231516.2	0.674598	2.10495	3.18661	0.00620461	0.130722	-2.26181	UP
ENSMUST00000021714.9	0.354049	5.71685	3.49663	0.00329624	0.089911	-2.26469	NOT
ENSMUST00000215393.2	-0.688143	3.90642	-3.30771	0.0048472	0.114931	-2.26556	DOWN
ENSMUST00000155669.8	-1.38009	-1.4352	-3.13142	0.00694246	0.14005	-2.2662	DOWN
ENSMUST00000108065.9	-0.77214	2.50734	-3.19914	0.00604833	0.128709	-2.2663	DOWN
ENSMUST00000154781.8	-1.04103	-0.646604	-3.11627	0.00715988	0.142611	-2.26687	DOWN
ENSMUST00000023610.15	1.21891	3.63082	3.29663	0.00495797	0.115877	-2.26687	UP
ENSMUST00000081554.13	0.324566	6.20399	3.53973	0.00301869	0.0853189	-2.26789	NOT
ENSMUST00000067744.8	-0.331118	7.00374	-3.6033	0.00265152	0.0794585	-2.27006	NOT
ENSMUST00000164343.8	0.784828	1.03156	3.13204	0.00693378	0.140015	-2.27203	UP
ENSMUST00000089959.7	0.54953	3.22462	3.25808	0.00536353	0.121211	-2.27258	NOT
ENSMUST00000138927.2	0.324003	6.87446	3.59678	0.002687	0.0799421	-2.27314	NOT
ENSMUST00000066070.7	0.340715	4.94959	3.41762	0.0038731	0.0996798	-2.27361	NOT
ENSMUST00000217621.2	-0.804355	0.773696	-3.11744	0.00714276	0.142482	-2.27624	DOWN
ENSMUST00000140134.2	-0.550233	2.54056	-3.19625	0.00608405	0.129135	-2.27871	NOT
ENSMUST00000156406.8	-1.18775	-0.0504233	-3.10565	0.00731619	0.144448	-2.2796	DOWN
ENSMUST00000031597.7	0.302807	6.21704	3.53497	0.00304811	0.0855674	-2.27979	NOT
ENSMUST00000138257.8	0.623002	2.053	3.17371	0.00636981	0.132542	-2.28009	UP
ENSMUST00000131800.2	-1.36148	-1.07489	-3.11131	0.00723247	0.14334	-2.2859	DOWN
ENSMUST00000103124.11	1.55705	-0.380762	3.10142	0.00737929	0.144944	-2.28669	UP
ENSMUST00000132718.8	0.311739	6.67395	3.57182	0.00282737	0.0822493	-2.2877	NOT
ENSMUST00000058286.9	-0.71733	1.1576	-3.12086	0.00709327	0.141843	-2.29016	DOWN
ENSMUST00000082430.11	1.74158	0.250851	3.10284	0.00735801	0.144839	-2.29145	UP
ENSMUST00000210055.2	-1.08945	0.139171	-3.09913	0.00741384	0.145327	-2.29179	DOWN
ENSMUST00000172719.8	-0.821342	2.15874	-3.16238	0.00651851	0.13419	-2.2958	DOWN
ENSMUST00000041987.8	-0.703383	3.55291	-3.26071	0.00533488	0.120876	-2.29595	DOWN
ENSMUST00000117641.8	-0.305015	8.37324	-3.71048	0.00213123	0.0702856	-2.29826	NOT
ENSMUST00000123671.8	-0.965442	0.975947	-3.10869	0.00727101	0.143643	-2.29928	DOWN
ENSMUST00000097698.5	-0.663272	1.32356	-3.12196	0.0070774	0.141695	-2.29949	DOWN
ENSMUST00000164968.2	1.39655	-0.531464	3.09193	0.00752307	0.14709	-2.30312	UP
ENSMUST00000016231.14	-0.202065	7.9012	-3.66341	0.00234572	0.074356	-2.31128	NOT
ENSMUST00000130795.2	-0.702961	0.908007	-3.10003	0.00740019	0.145146	-2.31376	DOWN
ENSMUST00000115074.6	1.18801	-0.527446	3.08462	0.00763575	0.147997	-2.31544	UP
ENSMUST00000135877.8	0.645819	2.95622	3.21235	0.00588765	0.12675	-2.32046	UP
ENSMUST00000120377.8	0.729088	2.46817	3.17791	0.00631561	0.132	-2.32049	UP
ENSMUST00000234046.2	0.727708	1.71935	3.13442	0.00690026	0.139424	-2.32074	UP
ENSMUST00000167180.8	-0.445259	4.14088	-3.30312	0.00489275	0.115163	-2.32399	NOT
ENSMUST00000140183.2	-1.03736	-0.638997	-3.07984	0.00771027	0.148826	-2.3265	DOWN
ENSMUST00000160565.4	1.63111	1.25789	3.10888	0.00726819	0.143643	-2.32898	UP
ENSMUST00000231629.2	1.16743	1.09927	3.1018	0.0073736	0.144944	-2.33131	UP
ENSMUST00000042710.8	0.490089	5.37055	3.4308	0.00377032	0.0980343	-2.33195	NOT
ENSMUST00000160159.3	-0.594518	3.49033	-3.2382	0.00558542	0.123708	-2.33353	DOWN
ENSMUST00000132049.2	-1.38383	-0.629425	-3.07542	0.00777977	0.149991	-2.33419	DOWN
ENSMUST00000149311.8	-0.783248	2.89642	-3.18824	0.00618403	0.130665	-2.33517	DOWN
ENSMUST00000208214.2	0.576122	4.19352	3.31292	0.00479591	0.114342	-2.33568	NOT
ENSMUST00000020452.12	-0.559763	4.5021	-3.32946	0.00463669	0.112453	-2.33708	NOT
ENSMUST00000170837.3	0.99528	0.0148602	3.07156	0.00784101	0.150818	-2.33983	UP
ENSMUST00000219054.2	-0.526672	4.20613	-3.2978	0.00494618	0.115766	-2.34417	NOT
ENSMUST00000053177.14	-0.343666	6.64035	-3.53368	0.00305616	0.0855674	-2.34498	NOT
ENSMUST00000092123.11	-0.546049	2.84208	-3.18185	0.00626512	0.131196	-2.3452	NOT
ENSMUST00000145328.2	-1.23119	-1.704	-3.08512	0.00762795	0.147997	-2.34792	DOWN
ENSMUST00000072965.5	0.433795	4.96812	3.38242	0.00416167	0.104162	-2.34857	NOT
ENSMUST00000143631.8	0.508019	3.86814	3.27372	0.00519515	0.119416	-2.35102	NOT
ENSMUST00000209927.2	0.69334	3.88721	3.27582	0.005173	0.119121	-2.35204	UP
ENSMUST00000137067.2	-0.869613	-0.1755	-3.06074	0.00801534	0.153183	-2.35512	DOWN
ENSMUST00000108357.8	0.750832	1.78437	3.11824	0.00713122	0.142383	-2.35678	UP
ENSMUST00000151119.9	0.617986	1.65526	3.11079	0.00724004	0.143376	-2.35788	UP
ENSMUST00000133100.2	-1.19788	-2.10656	-3.08969	0.00755747	0.147263	-2.35819	DOWN
ENSMUST00000111127.8	-1.11641	-0.0447217	-3.05718	0.00807346	0.153472	-2.36155	DOWN
ENSMUST00000125947.8	1.28624	-1.39113	3.06228	0.00799028	0.152793	-2.36592	UP
ENSMUST00000172057.8	-0.431216	4.42787	-3.3099	0.00482555	0.114577	-2.36623	NOT
ENSMUST00000036618.14	-0.357755	8.9884	-3.73011	0.00204773	0.0689879	-2.36995	NOT
ENSMUST00000154437.2	-1.01745	0.660521	-3.05885	0.00804616	0.153472	-2.37327	DOWN
ENSMUST00000063084.16	-0.206976	8.41068	-3.6782	0.00227605	0.0730968	-2.37338	NOT
ENSMUST00000220291.2	1.51289	1.48962	3.09475	0.00748013	0.146529	-2.37354	UP
ENSMUST00000060761.7	-1.11674	-1.34806	-3.05997	0.00802781	0.153332	-2.37478	DOWN
ENSMUST00000063040.12	0.39912	4.23217	3.29563	0.00496811	0.116031	-2.37523	NOT
ENSMUST00000140487.2	-1.18067	-0.713279	-3.04826	0.00822107	0.155108	-2.37951	DOWN
ENSMUST00000051379.14	-0.217849	8.61831	-3.69318	0.00220766	0.0718672	-2.38057	NOT
ENSMUST00000155873.3	0.603349	3.81966	3.25281	0.00542148	0.12185	-2.38384	UP
ENSMUST00000044384.5	0.831594	1.49455	3.08836	0.00757787	0.147485	-2.38559	UP
ENSMUST00000230847.2	-0.642575	3.01456	-3.17108	0.00640404	0.132885	-2.38687	DOWN
ENSMUST00000132274.8	-1.36077	1.41174	-3.07222	0.00783054	0.150705	-2.38697	DOWN
ENSMUST00000206720.2	-0.645824	3.34133	-3.19538	0.00609482	0.12928	-2.3905	DOWN
ENSMUST00000058437.14	0.432178	5.10998	3.37501	0.00422511	0.105272	-2.39172	NOT
ENSMUST00000130106.2	1.11612	-1.17961	3.04022	0.0083563	0.156199	-2.39675	UP
ENSMUST00000118856.8	1.08332	0.485645	3.046	0.00825879	0.155481	-2.39728	UP
ENSMUST00000127271.2	-0.49286	2.82085	-3.1536	0.00663603	0.135922	-2.39736	NOT
ENSMUST00000129589.8	-0.510987	3.56649	-3.21062	0.0059084	0.126967	-2.40047	NOT
ENSMUST00000093975.12	-0.929954	2.93859	-3.15506	0.00661639	0.135694	-2.40086	DOWN
ENSMUST00000076700.11	-0.316726	6.103	-3.45746	0.00357063	0.0944131	-2.40147	NOT
ENSMUST00000206592.2	-1.39371	0.743739	-3.04284	0.00831199	0.156058	-2.4016	DOWN
ENSMUST00000147853.8	1.21068	0.423494	3.04179	0.00832967	0.156188	-2.40237	UP
ENSMUST00000000894.6	1.36938	0.687951	3.04831	0.00822017	0.155108	-2.40266	UP
ENSMUST00000188027.2	1.12574	0.425928	3.03979	0.00836354	0.156199	-2.40588	UP
ENSMUST00000220781.2	-0.354678	5.51706	-3.39897	0.00402341	0.102236	-2.40617	NOT
ENSMUST00000220245.2	0.663293	0.890063	3.05106	0.00817444	0.15485	-2.40793	UP
ENSMUST00000179801.3	-0.421066	4.70482	-3.31632	0.0047627	0.114159	-2.40817	NOT
ENSMUST00000002891.11	-0.261018	5.73344	-3.42023	0.00385255	0.0994697	-2.40846	NOT
ENSMUST00000202543.4	-0.432596	4.0083	-3.24613	0.00549584	0.122635	-2.4125	NOT
ENSMUST00000186807.7	-0.685707	3.65438	-3.2097	0.00591948	0.127038	-2.41451	DOWN
ENSMUST00000152710.8	-0.989479	-0.501291	-3.02448	0.00862745	0.159584	-2.41618	DOWN
ENSMUST00000188947.7	1.27731	-1.25938	3.02842	0.00855885	0.158493	-2.41712	UP
ENSMUST00000176013.8	-1.37829	1.90362	-3.07513	0.00778439	0.149992	-2.41942	DOWN
ENSMUST00000218828.2	0.454274	4.00397	3.25103	0.00544122	0.122043	-2.42008	NOT
ENSMUST00000119989.3	-0.801996	1.53016	-3.06257	0.00798554	0.152792	-2.42028	DOWN
ENSMUST00000064165.5	-0.56701	7.93785	-3.60861	0.00262293	0.0787676	-2.42032	NOT
ENSMUST00000038673.14	0.524503	2.51974	3.12773	0.00699489	0.14073	-2.4204	NOT
ENSMUST00000001347.7	0.98114	0.0892517	3.02326	0.00864889	0.1598	-2.42391	UP
ENSMUST00000084203.11	0.639643	4.6547	3.31335	0.00479165	0.114342	-2.42553	UP
ENSMUST00000023225.8	0.260171	7.51368	3.57587	0.0028041	0.0819194	-2.42882	NOT
ENSMUST00000061101.12	0.225463	9.19691	3.72666	0.00206215	0.0689918	-2.4289	NOT
ENSMUST00000114666.9	0.553589	4.68728	3.31359	0.00478931	0.114342	-2.43079	NOT
ENSMUST00000130975.2	-1.10456	1.7298	-3.06297	0.0079791	0.152757	-2.43142	DOWN
ENSMUST00000230105.2	0.73797	2.54114	3.12348	0.00705555	0.141344	-2.43275	UP
ENSMUST00000228736.2	0.293331	5.80078	3.42024	0.00385247	0.0994697	-2.43337	NOT
ENSMUST00000065358.9	0.345491	5.15966	3.35845	0.00437031	0.107873	-2.43358	NOT
ENSMUST00000068584.7	0.342947	6.83532	3.5138	0.00318269	0.0881092	-2.43458	NOT
ENSMUST00000225473.2	-1.48864	-0.691956	-3.0136	0.0088201	0.161689	-2.4362	DOWN
ENSMUST00000003843.16	-0.253817	7.48837	-3.56515	0.00286612	0.0827166	-2.43625	NOT
ENSMUST00000145658.2	1.49893	-1.10958	3.01442	0.00880547	0.161511	-2.43679	UP
ENSMUST00000010286.8	-0.240401	6.89071	-3.51149	0.00319777	0.0881903	-2.43784	NOT
ENSMUST00000214580.2	1.22817	-0.750763	3.00994	0.00888573	0.162182	-2.44041	UP
ENSMUST00000099995.5	-0.590594	1.66649	-3.05748	0.00806855	0.153472	-2.44473	DOWN
ENSMUST00000130426.2	-0.871347	1.2531	-3.03716	0.00840838	0.15668	-2.44483	DOWN
ENSMUST00000211431.2	-1.15433	1.20216	-3.03236	0.00849062	0.157853	-2.44561	DOWN
ENSMUST00000027202.9	1.17689	-0.251952	3.00731	0.00893327	0.162327	-2.44575	UP
ENSMUST00000225857.2	0.312779	7.03187	3.52353	0.00312011	0.0867655	-2.44969	NOT
ENSMUST00000092074.12	-0.180794	8.40189	-3.63911	0.00246482	0.0761588	-2.45213	NOT
ENSMUST00000055221.9	-0.371708	5.66089	-3.38825	0.00411246	0.103566	-2.45508	NOT
ENSMUST00000183284.3	-0.622866	2.87343	-3.12492	0.00703493	0.141158	-2.45587	DOWN
ENSMUST00000231125.2	-0.576244	4.08211	-3.22905	0.00569067	0.1247	-2.45608	NOT
ENSMUST00000069792.14	0.400279	4.23561	3.25491	0.00539836	0.121413	-2.45633	NOT
ENSMUST00000122423.8	0.746268	3.96794	3.22986	0.00568125	0.124699	-2.45748	UP
ENSMUST00000030986.15	0.290947	7.71836	3.57948	0.00278353	0.0817715	-2.45869	NOT
ENSMUST00000006112.7	-0.564606	3.92246	-3.2121	0.0058906	0.12675	-2.45978	NOT
ENSMUST00000227688.2	-0.707089	0.434645	-3.00517	0.00897213	0.162658	-2.46038	DOWN
ENSMUST00000129269.8	-0.624918	4.948	-3.3111	0.0048137	0.114461	-2.46059	DOWN
ENSMUST00000019064.9	0.307016	5.92721	3.41827	0.00386799	0.0996266	-2.46143	NOT
ENSMUST00000235263.2	0.908904	-0.393162	2.99449	0.00916849	0.164942	-2.46594	UP
ENSMUST00000119130.2	1.0309	-1.39058	2.99955	0.00907493	0.163798	-2.46631	UP
ENSMUST00000000090.8	0.286829	4.8156	3.30436	0.00488044	0.115163	-2.47185	NOT
ENSMUST00000098098.9	-0.766542	3.75604	-3.18719	0.0061974	0.130716	-2.47219	DOWN
ENSMUST00000023622.13	0.308337	5.69386	3.39026	0.00409557	0.103507	-2.47346	NOT
ENSMUST00000088546.12	-0.484847	4.72144	-3.28368	0.00509066	0.11782	-2.47452	NOT
ENSMUST00000030830.4	-0.520121	6.65286	-3.46595	0.00350922	0.0935431	-2.47859	NOT
ENSMUST00000032476.11	0.988102	2.5885	3.10303	0.00735519	0.144839	-2.47876	UP
ENSMUST00000132846.2	0.337632	6.36307	3.44875	0.00363468	0.095721	-2.48085	NOT
ENSMUST00000187035.2	1.22129	-1.60836	2.99235	0.00920832	0.165387	-2.4825	UP
ENSMUST00000147975.2	-0.52378	3.32473	-3.14725	0.00672241	0.136842	-2.48366	NOT
ENSMUST00000004072.10	0.397429	6.08935	3.41981	0.00385584	0.0994697	-2.48958	NOT
ENSMUST00000076463.12	-0.316802	7.76901	-3.56179	0.0028858	0.0831385	-2.49184	NOT
ENSMUST00000020365.15	-0.58871	4.17668	-3.21699	0.00583225	0.126061	-2.49503	DOWN
ENSMUST00000142679.8	-0.840318	2.73277	-3.09123	0.00753387	0.14709	-2.49556	DOWN
ENSMUST00000145054.8	0.730271	0.561546	2.99125	0.00922896	0.165576	-2.49575	UP
ENSMUST00000191247.7	-0.783818	1.95341	-3.04218	0.00832318	0.156156	-2.49733	DOWN
ENSMUST00000235312.2	-1.10267	-0.576151	-2.97407	0.00955567	0.169337	-2.49958	DOWN
ENSMUST00000180095.4	0.232067	7.09398	3.50273	0.00325541	0.0893116	-2.50185	NOT
ENSMUST00000235172.2	0.556552	4.05639	3.21462	0.00586045	0.126433	-2.50235	NOT
ENSMUST00000109136.3	-0.632761	3.68896	-3.1666	0.00646281	0.133705	-2.50463	DOWN
ENSMUST00000063594.13	1.82972	0.319215	2.98105	0.00942151	0.167877	-2.5048	UP
ENSMUST00000026737.12	0.255058	7.59914	3.5459	0.00298087	0.0846248	-2.50517	NOT
ENSMUST00000139774.3	1.35178	0.800095	2.9937	0.00918315	0.165116	-2.5054	UP
ENSMUST00000081747.8	-0.303607	8.06	-3.58055	0.00277744	0.0816656	-2.50607	NOT
ENSMUST00000167977.8	-0.351173	6.27453	-3.42086	0.0038476	0.0994697	-2.50624	NOT
ENSMUST00000102567.4	-0.431631	4.0252	-3.19937	0.0060455	0.128709	-2.50698	NOT
ENSMUST00000145955.2	-1.43615	-1.77774	-2.98474	0.00935138	0.167133	-2.50706	DOWN
ENSMUST00000139403.2	-0.987433	-0.20521	-2.96898	0.00965473	0.170328	-2.5087	DOWN
ENSMUST00000058351.16	0.275679	5.50917	3.35341	0.00441554	0.108533	-2.51137	NOT
ENSMUST00000165418.9	-0.474243	4.32509	-3.22487	0.00573927	0.125218	-2.51333	NOT
ENSMUST00000030051.6	0.397656	4.36094	3.23706	0.00559842	0.123708	-2.51575	NOT
ENSMUST00000185001.8	0.695135	3.52199	3.15796	0.00657745	0.135028	-2.51664	UP
ENSMUST00000045154.6	-0.195869	7.71331	-3.54584	0.00298123	0.0846248	-2.51704	NOT
ENSMUST00000004428.14	-0.331979	4.65886	-3.25725	0.00537264	0.121325	-2.51871	NOT
ENSMUST00000112050.2	-0.486619	3.1714	-3.1161	0.00716226	0.142611	-2.52026	NOT
ENSMUST00000150667.8	1.53041	-1.8162	2.96862	0.00966168	0.170359	-2.5247	UP
ENSMUST00000031347.8	0.453473	3.25103	3.12826	0.00698726	0.140663	-2.5258	NOT
ENSMUST00000094294.5	-0.288173	5.70191	-3.35787	0.00437553	0.107873	-2.52669	NOT
ENSMUST00000021311.10	1.2378	-0.355685	2.95805	0.00987082	0.172839	-2.52746	UP
ENSMUST00000231679.2	-1.38486	-1.49026	-2.96577	0.00971766	0.17103	-2.528	DOWN
ENSMUST00000077367.11	0.200591	7.74416	3.5462	0.00297905	0.0846248	-2.52959	NOT
ENSMUST00000132034.5	0.30381	5.01225	3.29411	0.00498351	0.116182	-2.53172	NOT
ENSMUST00000107914.10	0.933631	0.144398	2.96076	0.00981667	0.172259	-2.53239	UP
ENSMUST00000232945.2	-0.584123	2.86347	-3.08379	0.00764852	0.14807	-2.53375	NOT
ENSMUST00000109057.8	0.182444	7.87353	3.5541	0.00293144	0.0840106	-2.53664	NOT
ENSMUST00000152019.2	-0.946499	2.04828	-3.02358	0.00864336	0.159788	-2.53819	DOWN
ENSMUST00000135746.8	-1.17656	-0.19352	-2.95075	0.0100177	0.174469	-2.53908	DOWN
ENSMUST00000173991.8	1.37112	-1.74827	2.95697	0.00989238	0.173125	-2.5414	UP
ENSMUST00000110167.5	0.298198	5.65509	3.35194	0.00442881	0.108696	-2.54277	NOT
ENSMUST00000126391.2	0.402476	4.7691	3.26445	0.00529438	0.120562	-2.54311	NOT
ENSMUST00000032133.5	-0.485369	4.61032	-3.23714	0.00559758	0.123708	-2.54347	NOT
ENSMUST00000154211.2	-0.990102	-1.36994	-2.95248	0.00998266	0.174147	-2.54468	DOWN
ENSMUST00000110387.4	-0.466814	4.36343	-3.21078	0.00590657	0.126967	-2.54791	NOT
ENSMUST00000021670.15	-0.539768	4.12705	-3.18431	0.00623378	0.131041	-2.55257	NOT
ENSMUST00000125390.8	-0.770075	1.7472	-3.00092	0.00904972	0.163433	-2.55321	DOWN
ENSMUST00000156967.8	1.16225	-0.757688	2.9413	0.010211	0.175795	-2.55327	UP
ENSMUST00000026459.6	0.212009	8.68746	3.61829	0.00257169	0.0781385	-2.55481	NOT
ENSMUST00000185027.2	-1.70176	-0.0373279	-2.94147	0.0102075	0.175795	-2.55559	DOWN
ENSMUST00000151485.8	-0.262037	6.81902	-3.44592	0.00365574	0.0959676	-2.55728	NOT
ENSMUST00000198239.2	0.756672	1.06357	2.97372	0.00956245	0.169337	-2.55795	UP
ENSMUST00000140246.8	-1.48286	-0.41928	-2.93676	0.0103053	0.176584	-2.56081	DOWN
ENSMUST00000143404.8	-0.431247	3.94536	-3.16402	0.00649678	0.133994	-2.56108	NOT
ENSMUST00000171960.2	0.932538	1.27831	2.98018	0.00943829	0.167941	-2.56387	UP
ENSMUST00000022787.8	-0.248843	9.61326	-3.69442	0.00220209	0.0718163	-2.56455	NOT
ENSMUST00000214908.2	1.20646	-0.57631	2.93464	0.0103494	0.177083	-2.56464	UP
ENSMUST00000164127.8	-0.726118	2.01403	-3.0077	0.00892613	0.162327	-2.56779	DOWN
ENSMUST00000089119.13	0.238669	7.02145	3.46362	0.00352596	0.0937609	-2.5682	NOT
ENSMUST00000081339.13	-0.397119	4.91128	-3.25627	0.00538335	0.121325	-2.5685	NOT
ENSMUST00000030763.13	0.467823	4.42342	3.2171	0.00583091	0.126061	-2.5685	NOT
ENSMUST00000205834.2	-0.744961	1.05595	-2.96096	0.00981284	0.172259	-2.56872	DOWN
ENSMUST00000013970.9	0.284052	5.43272	3.31726	0.00475366	0.114025	-2.5688	NOT
ENSMUST00000068654.5	1.14923	-0.094397	2.93544	0.0103328	0.176962	-2.56982	UP
ENSMUST00000038101.4	-0.42384	4.31407	-3.19467	0.00610356	0.129381	-2.57111	NOT
ENSMUST00000104999.4	-0.507132	4.2273	-3.18483	0.00622714	0.130985	-2.57174	NOT
ENSMUST00000020804.8	-0.421491	3.80636	-3.14457	0.00675916	0.137249	-2.57344	NOT
ENSMUST00000003156.15	0.280473	6.16595	3.38417	0.00414687	0.104033	-2.57406	NOT
ENSMUST00000043964.13	-0.60407	3.18909	-3.08552	0.00762182	0.14799	-2.57785	DOWN
ENSMUST00000189210.2	1.33683	-0.560052	2.92459	0.0105618	0.178924	-2.58144	UP
ENSMUST00000106348.8	0.974732	5.42618	3.31176	0.00480725	0.114391	-2.58274	UP
ENSMUST00000113480.2	-0.28261	6.30099	-3.38549	0.00413567	0.103911	-2.58445	NOT
ENSMUST00000128436.8	1.03048	0.307131	2.9337	0.0103693	0.177138	-2.585	UP
ENSMUST00000103015.4	-0.229199	6.67245	-3.41879	0.0038639	0.0995993	-2.58631	NOT
ENSMUST00000006123.11	0.638289	2.10613	3.01233	0.00884276	0.161771	-2.58654	UP
ENSMUST00000148672.2	-1.33674	-1.02787	-2.92195	0.0106185	0.179791	-2.58811	DOWN
ENSMUST00000126534.8	0.409774	7.26808	3.4751	0.00344432	0.0927906	-2.5914	NOT
ENSMUST00000188254.3	-0.458728	4.46144	-3.198	0.0060623	0.128839	-2.59234	NOT
ENSMUST00000186350.2	-0.80487	0.915221	-2.94159	0.0102051	0.175795	-2.59308	DOWN
ENSMUST00000022424.8	-1.35505	1.35606	-2.95372	0.00995759	0.173802	-2.59328	DOWN
ENSMUST00000123965.8	-1.33807	-0.26005	-2.91748	0.0107149	0.180491	-2.5937	DOWN
ENSMUST00000003459.4	-0.352989	5.71757	-3.32463	0.00468263	0.112982	-2.59407	NOT
ENSMUST00000213045.2	-0.972994	1.7821	-2.97811	0.00947784	0.168476	-2.59422	DOWN
ENSMUST00000232425.2	-0.898646	1.19058	-2.95052	0.0100224	0.174469	-2.59533	DOWN
ENSMUST00000238041.2	-1.75382	-1.34761	-2.92102	0.0106384	0.180035	-2.59607	DOWN
ENSMUST00000185641.7	0.577795	4.1114	3.17117	0.00640284	0.132885	-2.59828	NOT
ENSMUST00000130368.8	-1.36863	0.70538	-2.92946	0.0104584	0.178	-2.59853	DOWN
ENSMUST00000139970.8	0.936096	0.0816794	2.91865	0.0106896	0.180343	-2.60248	UP
ENSMUST00000015171.11	0.38042	4.81828	3.23906	0.00557568	0.123622	-2.60295	NOT
ENSMUST00000209124.2	-0.877813	2.32065	-3.00458	0.00898282	0.162762	-2.60586	DOWN
ENSMUST00000151559.2	1.44357	-0.196446	2.91118	0.010852	0.182147	-2.60909	UP
ENSMUST00000110382.9	0.829687	1.28837	2.95476	0.0099367	0.17353	-2.61029	UP
ENSMUST00000079735.12	0.552982	2.32798	3.01294	0.00883189	0.161751	-2.61159	NOT
ENSMUST00000138130.2	-0.937998	0.381015	-2.91562	0.010755	0.181075	-2.6116	DOWN
ENSMUST00000146136.8	-0.479448	4.6607	-3.20782	0.00594225	0.12736	-2.61201	NOT
ENSMUST00000161765.8	0.757909	2.10023	2.99811	0.00910138	0.164095	-2.61313	UP
ENSMUST00000047232.14	-0.245616	6.86827	-3.42254	0.00383438	0.0994697	-2.61399	NOT
ENSMUST00000099475.12	0.269441	5.67854	3.31824	0.00474415	0.113969	-2.6144	NOT
ENSMUST00000225439.2	0.724841	1.75962	2.97671	0.00950479	0.16868	-2.61474	UP
ENSMUST00000131721.2	-0.946631	-0.365775	-2.902	0.0110552	0.184112	-2.6187	DOWN
ENSMUST00000141531.8	-0.638793	4.32168	-3.16632	0.00646644	0.133705	-2.61915	DOWN
ENSMUST00000235483.2	0.712483	4.00874	3.15059	0.00667684	0.136356	-2.61981	UP
ENSMUST00000123838.8	-1.3727	-1.33858	-2.90502	0.010988	0.183585	-2.61992	DOWN
ENSMUST00000019198.7	0.297277	5.65211	3.31233	0.00480169	0.114342	-2.62149	NOT
ENSMUST00000088174.4	-0.193428	7.34831	-3.461	0.00354487	0.094035	-2.62366	NOT
ENSMUST00000142452.2	-0.75383	1.39569	-2.94285	0.0101791	0.175795	-2.62663	DOWN
ENSMUST00000234818.2	-0.552151	2.26354	-2.99183	0.00921796	0.165469	-2.62864	NOT
ENSMUST00000054107.6	-0.359415	5.24629	-3.26046	0.00533763	0.120876	-2.62985	NOT
ENSMUST00000019333.10	-0.255762	7.52866	-3.47307	0.00345862	0.0928507	-2.63015	NOT
ENSMUST00000090178.10	0.372765	5.73515	3.31572	0.0047686	0.114217	-2.63182	NOT
ENSMUST00000006614.3	-0.458545	4.91054	-3.22282	0.00576336	0.12566	-2.6326	NOT
ENSMUST00000113536.8	-0.467642	4.44859	-3.17604	0.00633965	0.132275	-2.63286	NOT
ENSMUST00000054815.15	0.293368	5.74114	3.31522	0.00477349	0.11425	-2.63296	NOT
ENSMUST00000125445.8	-0.984307	0.953735	-2.91867	0.010689	0.180343	-2.63367	DOWN
ENSMUST00000124591.8	0.389553	3.73039	3.11492	0.00717951	0.142833	-2.6337	NOT
ENSMUST00000057288.7	-0.264391	8.81998	-3.58654	0.00274371	0.081037	-2.63466	NOT
ENSMUST00000111742.8	-0.915885	0.333174	-2.90108	0.0110757	0.184112	-2.63475	DOWN
ENSMUST00000115731.10	0.460807	3.49078	3.09109	0.00753599	0.14709	-2.63789	NOT
ENSMUST00000169695.2	-0.226681	6.56819	-3.38315	0.00415549	0.10409	-2.63925	NOT
ENSMUST00000167493.9	0.202531	6.84993	3.41204	0.00391748	0.100507	-2.64105	NOT
ENSMUST00000039922.13	-0.289723	5.81417	-3.31039	0.00482074	0.114546	-2.64287	NOT
ENSMUST00000135346.8	1.05399	0.200166	2.89751	0.0111558	0.184691	-2.6429	UP
ENSMUST00000234534.2	-1.04771	0.49992	-2.8984	0.0111358	0.184551	-2.64497	DOWN
ENSMUST00000112473.2	-0.921063	1.66527	-2.94237	0.0101889	0.175795	-2.64914	DOWN
ENSMUST00000175911.8	-1.87509	0.0498732	-2.88515	0.0114376	0.187104	-2.65101	DOWN
ENSMUST00000224220.2	0.376982	5.66995	3.29983	0.0049257	0.115534	-2.65104	NOT
ENSMUST00000028055.11	-0.91591	0.246486	-2.88868	0.0113566	0.186514	-2.65302	DOWN
ENSMUST00000025399.9	0.744036	2.46261	3.00098	0.00904857	0.163433	-2.65314	UP
ENSMUST00000080359.12	-0.320011	5.4227	-3.26619	0.00527563	0.120386	-2.65434	NOT
ENSMUST00000193539.6	-1.41252	-1.15664	-2.88136	0.0115253	0.187835	-2.6545	DOWN
ENSMUST00000173678.3	-0.672873	2.08145	-2.96536	0.00972579	0.17103	-2.65468	DOWN
ENSMUST00000155770.8	-1.08965	-1.15593	-2.88019	0.0115526	0.187895	-2.65586	DOWN
ENSMUST00000073316.13	1.07883	1.53622	2.94146	0.0102078	0.175795	-2.65758	UP
ENSMUST00000140369.2	0.704766	2.55081	3.00341	0.00900417	0.162789	-2.65981	UP
ENSMUST00000200815.4	1.35486	-1.92537	2.88344	0.0114771	0.187368	-2.65993	UP
ENSMUST00000127136.2	1.26955	-0.883362	2.87423	0.0116924	0.189189	-2.66279	UP
ENSMUST00000023454.12	-0.906109	1.4811	-2.92518	0.0105493	0.178896	-2.66284	DOWN
ENSMUST00000166117.4	0.770766	0.839732	2.9053	0.0109817	0.183572	-2.66336	UP
ENSMUST00000138868.8	-1.14148	0.911407	-2.89859	0.0111315	0.184551	-2.66443	DOWN
ENSMUST00000206211.2	-0.884505	0.502569	-2.8873	0.0113881	0.186751	-2.66539	DOWN
ENSMUST00000026405.10	0.332149	4.18657	3.14078	0.00681146	0.138055	-2.66928	NOT
ENSMUST00000004827.14	1.03366	3.68779	3.09449	0.00748406	0.146529	-2.67012	UP
ENSMUST00000130347.8	-0.633021	2.07828	-2.95549	0.00992195	0.17337	-2.67293	DOWN
ENSMUST00000074945.8	0.905959	1.07387	2.90956	0.0108877	0.182466	-2.67365	UP
ENSMUST00000181892.9	-0.266016	5.63673	-3.27815	0.0051485	0.118806	-2.67403	NOT
ENSMUST00000075639.11	0.491607	2.7143	3.00704	0.00893824	0.162327	-2.67448	NOT
ENSMUST00000055349.15	-0.33556	4.73927	-3.18614	0.00621064	0.130722	-2.6746	NOT
ENSMUST00000146093.2	1.16569	-0.657287	2.86722	0.0118588	0.191221	-2.67521	UP
ENSMUST00000134063.8	-0.250622	8.89105	-3.57277	0.00282189	0.0822358	-2.67589	NOT
ENSMUST00000034441.8	-0.19484	8.03514	-3.49323	0.00331917	0.090386	-2.68202	NOT
ENSMUST00000224188.2	0.744818	3.26955	3.04939	0.0082022	0.155039	-2.68291	UP
ENSMUST00000236403.2	0.715555	2.29628	2.97245	0.00958723	0.169685	-2.68435	UP
ENSMUST00000058839.10	0.248687	7.61949	3.4585	0.00356306	0.0944131	-2.68612	NOT
ENSMUST00000211748.2	0.864146	2.67433	2.9987	0.00909062	0.163991	-2.68724	UP
ENSMUST00000112676.4	-0.36261	5.07153	-3.21343	0.00587471	0.126658	-2.68763	NOT
ENSMUST00000222513.2	-1.08209	2.48375	-2.96815	0.00967107	0.170433	-2.68788	DOWN
ENSMUST00000126869.2	-1.17132	2.91696	-2.99713	0.00911962	0.164333	-2.68906	DOWN
ENSMUST00000136685.2	-1.18513	-1.19834	-2.85922	0.0120517	0.193118	-2.68969	DOWN
ENSMUST00000122883.2	-0.847278	1.98909	-2.93788	0.010282	0.176485	-2.6911	DOWN
ENSMUST00000075869.13	1.06977	0.899477	2.89201	0.0112803	0.185913	-2.69167	UP
ENSMUST00000132186.8	0.451114	3.90242	3.10182	0.00737335	0.144944	-2.69215	NOT
ENSMUST00000131011.2	0.375722	4.71743	3.18328	0.00624694	0.131127	-2.69277	NOT
ENSMUST00000027425.16	0.179618	9.89072	3.66221	0.00235147	0.0744081	-2.69371	NOT
ENSMUST00000051416.12	-0.634723	4.30256	-3.12649	0.00701251	0.140825	-2.69475	DOWN
ENSMUST00000147385.8	-0.580212	3.4736	-3.04891	0.00821013	0.155099	-2.69603	NOT
ENSMUST00000103145.11	0.73616	2.20781	2.9596	0.00983989	0.172574	-2.69746	UP
ENSMUST00000227118.2	-0.811062	1.44192	-2.90398	0.011011	0.183875	-2.69913	DOWN
ENSMUST00000133456.2	-0.531084	1.83217	-2.926	0.0105319	0.178879	-2.7017	NOT
ENSMUST00000208770.2	0.473441	2.87644	3.00524	0.00897078	0.162658	-2.70179	NOT
ENSMUST00000003622.16	0.340232	5.64941	3.27146	0.00521915	0.119596	-2.70359	NOT
ENSMUST00000141447.2	-0.467877	3.73273	-3.06816	0.00789548	0.151595	-2.70681	NOT
ENSMUST00000067230.6	-0.291028	7.8968	-3.46709	0.00350111	0.0934948	-2.70798	NOT
ENSMUST00000170941.3	0.669927	2.10839	2.94651	0.0101039	0.175052	-2.70902	UP
ENSMUST00000137834.2	-0.691698	2.04294	-2.9321	0.0104029	0.177514	-2.71052	DOWN
ENSMUST00000071858.5	0.409516	3.81452	3.08103	0.00769165	0.148642	-2.71552	NOT
ENSMUST00000179525.10	0.274422	5.82934	3.28196	0.0051086	0.118052	-2.71601	NOT
ENSMUST00000024749.9	0.933036	2.18563	2.94794	0.0100748	0.174733	-2.71718	UP
ENSMUST00000232047.2	-0.814242	1.59776	-2.90146	0.0110672	0.184112	-2.71791	DOWN
ENSMUST00000052248.8	0.423942	5.80953	3.2783	0.00514687	0.118806	-2.72148	NOT
ENSMUST00000097014.7	-0.237489	8.09568	-3.4785	0.00342051	0.0923032	-2.7219	NOT
ENSMUST00000121661.8	0.252332	5.69596	3.26503	0.00528807	0.120562	-2.72393	NOT
ENSMUST00000197006.2	0.930609	1.37034	2.89487	0.0112154	0.185308	-2.72569	UP
ENSMUST00000079644.13	0.236185	6.71428	3.35824	0.00437224	0.107873	-2.72574	NOT
ENSMUST00000044331.7	-0.315036	5.65005	-3.25207	0.00542973	0.121951	-2.7268	NOT
ENSMUST00000205671.2	0.673178	1.48883	2.89988	0.0111026	0.184466	-2.72718	UP
ENSMUST00000211569.2	1.52395	-1.20601	2.83364	0.0126889	0.197938	-2.7286	UP
ENSMUST00000188376.2	-1.23286	-1.24945	-2.83338	0.0126954	0.197938	-2.73105	DOWN
ENSMUST00000202370.2	0.662213	1.40798	2.89303	0.0112571	0.185717	-2.73168	UP
ENSMUST00000226722.2	0.230341	9.92733	3.64677	0.00242664	0.0753928	-2.7332	NOT
ENSMUST00000166646.2	1.09297	1.96163	2.92494	0.0105545	0.178896	-2.73329	UP
ENSMUST00000197646.5	1.03922	-0.916782	2.82747	0.0128473	0.199891	-2.73849	UP
ENSMUST00000224157.2	-0.841892	0.22641	-2.83745	0.0125918	0.197547	-2.73962	DOWN
ENSMUST00000154178.2	-0.443206	5.91956	-3.26912	0.00524411	0.119929	-2.74126	NOT
ENSMUST00000169055.10	0.579505	2.78325	2.97702	0.00949873	0.168664	-2.74204	NOT
ENSMUST00000032776.15	-0.329163	6.66441	-3.33909	0.00454654	0.11084	-2.74252	NOT
ENSMUST00000130702.2	-0.589833	2.38025	-2.93755	0.0102888	0.176485	-2.74283	DOWN
ENSMUST00000060311.12	0.951213	2.25282	2.93706	0.0102989	0.176567	-2.7459	UP
ENSMUST00000100847.5	0.723003	0.393024	2.84188	0.0124801	0.196765	-2.74634	UP
ENSMUST00000076532.14	0.450995	3.42889	3.02878	0.00855251	0.158493	-2.74682	NOT
ENSMUST00000112294.9	0.426988	3.46623	3.03156	0.00850454	0.158023	-2.74781	NOT
ENSMUST00000155798.2	1.03545	-1.41678	2.8212	0.0130106	0.2014	-2.74972	UP
ENSMUST00000209047.2	-1.10109	1.26789	-2.86374	0.0119423	0.192095	-2.75185	DOWN
ENSMUST00000210005.2	-0.592321	4.14014	-3.08136	0.00768643	0.148642	-2.75258	DOWN
ENSMUST00000232702.2	0.838147	1.98257	2.91461	0.0107771	0.181353	-2.75391	UP
ENSMUST00000118279.2	-0.472299	4.35683	-3.10411	0.00733903	0.144638	-2.75452	NOT
ENSMUST00000125780.2	-0.535314	2.20725	-2.92008	0.0106586	0.180285	-2.75495	NOT
ENSMUST00000075281.8	-0.375911	6.35217	-3.30405	0.00488345	0.115163	-2.75535	NOT
ENSMUST00000106616.2	0.899472	0.988445	2.85944	0.0120462	0.193118	-2.75578	UP
ENSMUST00000237122.2	0.286856	7.03091	3.3714	0.00425635	0.105809	-2.75694	NOT
ENSMUST00000211911.2	-0.496516	5.1856	-3.18769	0.00619099	0.130716	-2.75715	NOT
ENSMUST00000035667.9	-0.468439	3.3558	-3.00714	0.00893627	0.162327	-2.75841	NOT
ENSMUST00000044492.10	-0.358415	4.50725	-3.11933	0.00711539	0.142195	-2.7588	NOT
ENSMUST00000107491.11	0.461077	3.10603	2.99278	0.00920036	0.165334	-2.76154	NOT
ENSMUST00000029891.12	-0.296634	5.64512	-3.23444	0.0056284	0.12415	-2.7619	NOT
ENSMUST00000219285.2	-0.661723	1.1564	-2.85477	0.0121601	0.194016	-2.76483	DOWN
ENSMUST00000167377.3	0.71849	3.92841	3.06787	0.00790007	0.151595	-2.76563	UP
ENSMUST00000117513.8	-0.210385	9.30362	-3.56698	0.00285543	0.0826263	-2.76661	NOT
ENSMUST00000186303.7	0.878066	0.774573	2.84349	0.0124397	0.196417	-2.76767	UP
ENSMUST00000001513.8	0.342044	4.7311	3.14601	0.00673939	0.137018	-2.76857	NOT
ENSMUST00000168036.8	-0.400238	5.10554	-3.17526	0.00634976	0.132275	-2.7691	NOT
ENSMUST00000237393.2	-0.844425	-0.650123	-2.80841	0.0133494	0.203554	-2.76985	DOWN
ENSMUST00000183271.2	1.10185	-0.162549	2.81478	0.0131794	0.202278	-2.77106	UP
ENSMUST00000084616.3	-0.418372	4.07196	-3.06759	0.00790451	0.151595	-2.77282	NOT
ENSMUST00000038701.8	-0.3305	4.67729	-3.12967	0.0069673	0.140433	-2.77396	NOT
ENSMUST00000002413.15	-0.487563	2.75501	-2.94838	0.0100658	0.174691	-2.77506	NOT
ENSMUST00000138603.9	0.968434	0.691997	2.83585	0.0126326	0.197676	-2.77538	UP
ENSMUST00000205331.2	-0.884219	0.85736	-2.83372	0.0126868	0.197938	-2.77731	DOWN
ENSMUST00000146988.8	1.00453	0.756946	2.83736	0.0125943	0.197547	-2.77735	UP
ENSMUST00000031366.12	2.06813	-0.369257	2.80884	0.013338	0.203554	-2.77756	UP
ENSMUST00000026169.7	0.318169	4.50107	3.11699	0.0071493	0.142526	-2.7787	NOT
ENSMUST00000233034.2	-0.512436	3.63531	-3.02102	0.00868838	0.160349	-2.77899	NOT
ENSMUST00000131792.8	-0.827948	1.57099	-2.86606	0.0118865	0.19148	-2.77959	DOWN
ENSMUST00000186857.7	0.609716	6.21638	3.28799	0.00504611	0.117185	-2.78056	UP
ENSMUST00000183247.2	-1.22488	0.577237	-2.8169	0.0131234	0.201891	-2.78697	DOWN
ENSMUST00000090205.5	0.800417	0.601755	2.82474	0.0129181	0.200613	-2.78838	UP
ENSMUST00000131744.2	-1.51678	-0.409935	-2.7977	0.01364	0.205785	-2.78904	DOWN
ENSMUST00000113355.9	-0.246211	6.28966	-3.2827	0.00510086	0.117956	-2.78974	NOT
ENSMUST00000206129.3	-1.52353	-1.85905	-2.801	0.0135497	0.205416	-2.7912	DOWN
ENSMUST00000204616.2	-1.04019	0.689137	-2.81875	0.0130747	0.201834	-2.79155	DOWN
ENSMUST00000123320.8	0.257741	9.21099	3.54984	0.00295705	0.0843762	-2.79333	NOT
ENSMUST00000232169.2	-0.654754	1.59445	-2.86092	0.0120103	0.192786	-2.79361	DOWN
ENSMUST00000021647.14	-0.408487	5.39893	-3.19237	0.00613234	0.129656	-2.79394	NOT
ENSMUST00000117291.8	0.563289	3.11009	2.97592	0.00952005	0.16886	-2.79522	NOT
ENSMUST00000127089.2	0.682191	0.920986	2.8333	0.0126976	0.197938	-2.79579	UP
ENSMUST00000066489.13	0.453994	2.95692	2.96119	0.00980822	0.172259	-2.79751	NOT
ENSMUST00000040717.7	1.06119	0.297154	2.80799	0.0133606	0.203629	-2.80049	UP
ENSMUST00000085060.3	-0.835893	2.48492	-2.90978	0.0108828	0.182466	-2.80286	DOWN
ENSMUST00000150409.2	1.04257	-2.13111	2.79326	0.013762	0.206771	-2.80307	UP
ENSMUST00000049732.11	0.725313	0.568283	2.81334	0.0132177	0.202771	-2.80572	UP
ENSMUST00000023352.9	-0.423362	3.67845	-3.01224	0.00884433	0.161771	-2.80599	NOT
ENSMUST00000129339.8	0.524352	2.7759	2.94209	0.0101946	0.175795	-2.80624	NOT
ENSMUST00000195970.5	-0.503263	5.31852	-3.17501	0.00635294	0.132275	-2.80706	NOT
ENSMUST00000026817.11	0.704031	0.77968	2.82076	0.0130219	0.201461	-2.8071	UP
ENSMUST00000026723.9	0.260104	6.36463	3.28591	0.00506761	0.117435	-2.80768	NOT
ENSMUST00000141844.2	0.806499	0.211744	2.80038	0.0135667	0.205416	-2.80857	UP
ENSMUST00000032111.11	0.689316	3.6388	3.01466	0.00880113	0.161511	-2.81397	UP
ENSMUST00000079086.8	1.28716	-0.490859	2.78418	0.0140153	0.208778	-2.8143	UP
ENSMUST00000006467.14	0.349311	6.48093	3.29325	0.00499229	0.116182	-2.81557	NOT
ENSMUST00000130198.3	0.407316	3.6162	3.0099	0.00888655	0.162182	-2.81584	NOT
ENSMUST00000032622.9	-0.557476	3.67169	-3.00345	0.00900353	0.162789	-2.81688	NOT
ENSMUST00000131101.3	1.14793	-0.316937	2.78348	0.0140351	0.208907	-2.81917	UP
ENSMUST00000032264.9	0.355	5.38848	3.18644	0.00620685	0.130722	-2.82161	NOT
ENSMUST00000137857.8	0.790508	1.58219	2.85078	0.0122583	0.194792	-2.8258	UP
ENSMUST00000198373.2	0.904327	-0.849242	2.77354	0.0143177	0.211505	-2.82604	UP
ENSMUST00000018186.16	0.451273	3.99118	3.03984	0.00836279	0.156199	-2.82953	NOT
ENSMUST00000029116.14	-0.29358	5.80318	-3.2159	0.00584525	0.126188	-2.82979	NOT
ENSMUST00000184575.2	-1.27853	-0.691678	-2.77081	0.0143963	0.212125	-2.82995	DOWN
ENSMUST00000035196.14	0.822922	1.69602	2.85515	0.0121509	0.194016	-2.8301	UP
ENSMUST00000020298.8	1.41647	-2.71741	2.78308	0.0140464	0.208907	-2.83185	UP
ENSMUST00000173168.8	1.03846	1.91066	2.86523	0.0119065	0.191614	-2.83662	UP
ENSMUST00000228445.2	1.31223	-0.846167	2.7642	0.0145887	0.212856	-2.84144	UP
ENSMUST00000126354.8	-0.85853	-0.61618	-2.7644	0.0145829	0.212856	-2.84151	DOWN
ENSMUST00000021141.14	-0.524493	3.9014	-3.01285	0.00883338	0.161751	-2.8435	NOT
ENSMUST00000227868.2	-0.459712	3.63749	-2.98795	0.00929081	0.166232	-2.84442	NOT
ENSMUST00000154348.2	-1.22648	0.699886	-2.78628	0.0139565	0.208262	-2.84595	DOWN
ENSMUST00000076623.8	0.510366	4.18305	3.05057	0.00818261	0.15485	-2.84703	NOT
ENSMUST00000154201.2	-0.949511	-0.100704	-2.76693	0.0145089	0.212574	-2.84714	DOWN
ENSMUST00000207746.3	0.606402	1.99415	2.8623	0.011977	0.192444	-2.84968	UP
ENSMUST00000173441.9	0.251012	5.9669	3.22734	0.00571042	0.124838	-2.85083	NOT
ENSMUST00000138969.2	1.30399	-1.32522	2.75595	0.014832	0.214682	-2.85236	UP
ENSMUST00000108408.9	0.72962	2.62981	2.90684	0.0109476	0.183096	-2.85247	UP
ENSMUST00000235598.2	-1.4981	-0.530107	-2.75766	0.0147812	0.214561	-2.85266	DOWN
ENSMUST00000151695.2	-0.617497	0.736646	-2.78697	0.013937	0.20816	-2.85339	DOWN
ENSMUST00000135376.2	1.12816	-2.62287	2.76629	0.0145276	0.212574	-2.85468	UP
ENSMUST00000197711.2	0.763069	0.517412	2.78293	0.0140506	0.208907	-2.85505	UP
ENSMUST00000153677.2	-2.09405	-1.87251	-2.75733	0.0147909	0.214561	-2.85943	DOWN
ENSMUST00000117842.2	-1.00393	-0.219601	-2.75666	0.0148109	0.214561	-2.86099	DOWN
ENSMUST00000206371.2	-0.441995	4.44248	-3.05829	0.00805523	0.153472	-2.86295	NOT
ENSMUST00000217998.2	-1.45927	-0.620391	-2.75043	0.0149967	0.215339	-2.86336	DOWN
ENSMUST00000040487.4	0.643722	2.72112	2.90711	0.0109417	0.18309	-2.86462	UP
ENSMUST00000103092.9	0.202287	7.38068	3.34721	0.00447175	0.109505	-2.86743	NOT
ENSMUST00000225209.2	-0.939543	1.10206	-2.79165	0.0138068	0.206968	-2.86824	DOWN
ENSMUST00000000543.6	1.09174	-0.970672	2.74568	0.0151402	0.215724	-2.86997	UP
ENSMUST00000189655.2	-0.807075	3.6779	-2.97145	0.00960664	0.169895	-2.87108	DOWN
ENSMUST00000235129.2	0.684181	2.8395	2.91237	0.0108259	0.18193	-2.87285	UP
ENSMUST00000174275.2	1.22219	-1.68917	2.74217	0.0152471	0.21612	-2.87543	UP
ENSMUST00000107208.8	-0.849029	4.31508	-3.03086	0.00851657	0.158067	-2.87568	DOWN
ENSMUST00000229276.2	1.13289	-0.585707	2.74524	0.0151535	0.21582	-2.87599	UP
ENSMUST00000209858.2	-1.00368	1.7301	-2.81833	0.0130858	0.201834	-2.87784	DOWN
ENSMUST00000041890.8	-0.333547	7.20767	-3.31902	0.00473659	0.113969	-2.88148	NOT
ENSMUST00000124563.8	0.555997	2.56246	2.88488	0.0114438	0.187104	-2.8822	NOT
ENSMUST00000171565.8	1.01577	2.45245	2.87751	0.0116152	0.188311	-2.883	UP
ENSMUST00000075827.5	0.350577	5.23539	3.13962	0.00682764	0.138298	-2.88377	NOT
ENSMUST00000224143.2	-0.919818	0.822503	-2.77111	0.0143877	0.212092	-2.88408	DOWN
ENSMUST00000233683.2	-0.532634	3.18683	-2.92523	0.0105483	0.178896	-2.88436	NOT
ENSMUST00000143816.8	-1.03261	-0.0833123	-2.74454	0.0151748	0.215935	-2.88464	DOWN
ENSMUST00000142233.2	-0.99875	-0.770185	-2.73499	0.0154677	0.21834	-2.88712	DOWN
ENSMUST00000061468.9	0.538835	2.71856	2.89421	0.0112305	0.185381	-2.88751	NOT
ENSMUST00000159096.8	0.499961	2.6151	2.88537	0.0114326	0.187104	-2.88833	NOT
ENSMUST00000019833.5	0.621254	1.60262	2.81552	0.0131599	0.202072	-2.89062	UP
ENSMUST00000196304.2	1.33482	-0.872148	2.73342	0.0155166	0.21834	-2.89092	UP
ENSMUST00000168578.3	0.87685	0.151141	2.74842	0.0150574	0.215494	-2.89395	UP
ENSMUST00000234841.2	0.570837	2.26567	2.85506	0.0121531	0.194016	-2.89682	NOT
ENSMUST00000209362.2	1.37332	-1.19308	2.72719	0.0157112	0.220084	-2.89816	UP
ENSMUST00000044116.14	-0.2219	6.74709	-3.27028	0.00523171	0.1198	-2.89928	NOT
ENSMUST00000203436.3	0.335909	4.47578	3.05284	0.008145	0.154491	-2.89936	NOT
ENSMUST00000239458.2	0.672087	2.52553	2.87227	0.0117387	0.189564	-2.90113	UP
ENSMUST00000029459.10	-0.357023	4.90766	-3.08744	0.00759208	0.147674	-2.90349	NOT
ENSMUST00000002112.15	0.419815	3.46795	2.95002	0.0100324	0.174552	-2.90415	NOT
ENSMUST00000048116.15	0.705057	1.37925	2.7944	0.0137307	0.206395	-2.90576	UP
ENSMUST00000162963.8	-0.374691	4.86804	-3.08116	0.0076896	0.148642	-2.90617	NOT
ENSMUST00000186045.2	0.618158	1.10812	2.779	0.0141618	0.209894	-2.90696	UP
ENSMUST00000112707.3	1.19352	2.11524	2.84053	0.0125139	0.196901	-2.90711	UP
ENSMUST00000135704.2	-0.439098	4.3655	-3.02749	0.00857507	0.158704	-2.90741	NOT
ENSMUST00000154145.2	-0.271195	11.0032	-3.66302	0.00234756	0.074356	-2.90794	NOT
ENSMUST00000222485.2	0.331609	4.33646	3.03364	0.00846869	0.15759	-2.90834	NOT
ENSMUST00000105734.10	-0.431048	4.48257	-3.03861	0.00838363	0.156485	-2.90876	NOT
ENSMUST00000155204.2	-0.852784	0.596139	-2.74793	0.0150721	0.215494	-2.90957	DOWN
ENSMUST00000056427.10	-0.250019	7.45993	-3.32888	0.00464222	0.112503	-2.90969	NOT
ENSMUST00000044011.12	0.208524	6.42677	3.24012	0.00556362	0.123502	-2.9101	NOT
ENSMUST00000049124.10	-0.45087	4.18023	-3.00699	0.00893901	0.162327	-2.91025	NOT
ENSMUST00000124427.2	0.795998	1.24471	2.78457	0.0140043	0.208778	-2.91056	UP
ENSMUST00000075175.12	0.386985	4.2246	3.02024	0.00870207	0.160511	-2.91242	NOT
ENSMUST00000199588.2	-0.94643	1.06734	-2.76422	0.0145881	0.212856	-2.913	DOWN
ENSMUST00000021903.3	-0.698601	4.66378	-3.05055	0.00818281	0.15485	-2.91307	DOWN
ENSMUST00000033418.8	-0.173498	8.26635	-3.40044	0.00401138	0.102114	-2.91311	NOT
ENSMUST00000108883.10	-0.309132	5.72347	-3.16415	0.00649504	0.133994	-2.91688	NOT
ENSMUST00000038709.14	-0.221194	7.62197	-3.33953	0.00454245	0.110822	-2.91806	NOT
ENSMUST00000155281.8	0.895264	4.42571	3.03981	0.00836322	0.156199	-2.91866	UP
ENSMUST00000200575.5	-1.14646	-0.829943	-2.71473	0.0161077	0.223393	-2.91885	DOWN
ENSMUST00000067268.15	-0.210232	7.40617	-3.31901	0.00473668	0.113969	-2.92079	NOT
ENSMUST00000022097.6	0.390622	3.8886	2.97999	0.00944192	0.167941	-2.92435	NOT
ENSMUST00000159671.8	-1.10676	-0.441291	-2.71431	0.016121	0.223393	-2.92517	DOWN
ENSMUST00000023608.14	0.31319	5.15529	3.11006	0.00725084	0.143417	-2.92537	NOT
ENSMUST00000147797.8	-1.417	0.0838021	-2.72187	0.0158794	0.221467	-2.92612	DOWN
ENSMUST00000170242.8	0.601016	4.04244	2.99526	0.00915425	0.164776	-2.92696	UP
ENSMUST00000188746.7	0.471026	2.96199	2.89265	0.0112657	0.185765	-2.92763	NOT
ENSMUST00000136873.8	1.25068	-1.18879	2.7079	0.0163292	0.224759	-2.92874	UP
ENSMUST00000059026.10	-0.232749	7.24325	-3.29941	0.00492997	0.115551	-2.93028	NOT
ENSMUST00000141725.3	-0.53411	3.33441	-2.91246	0.010824	0.18193	-2.93376	NOT
ENSMUST00000230542.2	-0.577481	3.01273	-2.88347	0.0114764	0.187368	-2.93456	NOT
ENSMUST00000021676.12	0.323803	4.21966	3.00784	0.00892373	0.162327	-2.93475	NOT
ENSMUST00000129620.2	1.53598	-0.42922	2.71171	0.0162051	0.223802	-2.93542	UP
ENSMUST00000023510.7	-0.247838	5.81897	-3.16338	0.00650526	0.134085	-2.93869	NOT
ENSMUST00000054666.7	-1.13941	-0.630404	-2.70276	0.0164975	0.225535	-2.94041	DOWN
ENSMUST00000026625.7	0.644337	1.80777	2.79998	0.0135774	0.205416	-2.94157	UP
ENSMUST00000167000.8	-1.00872	1.92041	-2.79448	0.0137283	0.206395	-2.9423	DOWN
ENSMUST00000110557.5	0.450267	3.73273	2.95548	0.00992225	0.17337	-2.94239	NOT
ENSMUST00000151802.2	0.874133	1.62323	2.78857	0.0138923	0.207872	-2.94259	UP
ENSMUST00000107868.8	-0.366699	4.44436	-3.01837	0.00873521	0.160981	-2.94272	NOT
ENSMUST00000005504.15	0.893807	1.36099	2.77305	0.0143319	0.211505	-2.94273	UP
ENSMUST00000144552.8	-0.994902	-0.589172	-2.70166	0.016534	0.225591	-2.94308	DOWN
ENSMUST00000196575.5	-0.785765	1.70147	-2.78243	0.0140646	0.20902	-2.94344	DOWN
ENSMUST00000007245.8	-0.939099	0.783445	-2.73335	0.0155187	0.21834	-2.94543	DOWN
ENSMUST00000055655.9	0.850249	2.65215	2.85901	0.0120566	0.193118	-2.94574	UP
ENSMUST00000056153.8	-0.885811	0.176738	-2.71305	0.0161617	0.223485	-2.94693	DOWN
ENSMUST00000111257.8	-0.667053	3.64499	-2.93113	0.0104232	0.177769	-2.94781	DOWN
ENSMUST00000017922.9	0.435832	3.06233	2.88937	0.0113405	0.186344	-2.94941	NOT
ENSMUST00000135308.2	-1.10153	-1.64137	-2.69467	0.0167662	0.227154	-2.94992	DOWN
ENSMUST00000195524.2	-0.734537	4.08813	-2.97103	0.00961466	0.169895	-2.95018	DOWN
ENSMUST00000123786.9	1.12431	-0.312466	2.70223	0.0165149	0.225535	-2.95352	UP
ENSMUST00000187429.4	-0.381722	4.70498	-3.03991	0.00836154	0.156199	-2.95371	NOT
ENSMUST00000087333.9	-0.330574	5.64541	-3.13643	0.00687215	0.139028	-2.95608	NOT
ENSMUST00000209969.3	1.05985	0.0119546	2.70605	0.0163897	0.225299	-2.95933	UP
ENSMUST00000188395.2	-1.10343	-0.3126	-2.69476	0.0167632	0.227154	-2.95995	DOWN
ENSMUST00000109415.2	-1.16748	-0.569041	-2.69074	0.0168983	0.227908	-2.96074	DOWN
ENSMUST00000139161.2	-0.79214	1.51	-2.76045	0.0146986	0.213888	-2.96224	DOWN
ENSMUST00000064924.6	-0.308176	5.44011	-3.1124	0.00721639	0.143167	-2.96316	NOT
ENSMUST00000057561.9	-0.320298	5.24806	-3.09223	0.00751848	0.14709	-2.9644	NOT
ENSMUST00000210208.2	-0.401261	3.15654	-2.88011	0.0115546	0.187895	-2.96765	NOT
ENSMUST00000018711.15	0.362452	5.80513	3.15301	0.00664407	0.135922	-2.96959	NOT
ENSMUST00000046745.7	1.3697	2.40078	2.82664	0.0128689	0.200132	-2.9706	UP
ENSMUST00000220559.2	0.995953	-1.33111	2.68015	0.0172594	0.23088	-2.97169	UP
ENSMUST00000224107.2	-0.61678	2.87354	-2.85105	0.0122517	0.194781	-2.97219	DOWN
ENSMUST00000173238.8	-0.917443	1.55936	-2.75574	0.0148381	0.214682	-2.97321	DOWN
ENSMUST00000126267.8	1.15244	2.76777	2.85404	0.0121782	0.194176	-2.97327	UP
ENSMUST00000195022.2	1.0804	-0.162707	2.69338	0.0168097	0.227461	-2.9733	UP
ENSMUST00000232023.2	-0.284089	4.97462	-3.05926	0.00803944	0.153465	-2.97381	NOT
ENSMUST00000154590.2	-0.992835	1.26848	-2.73831	0.0153655	0.217492	-2.97408	DOWN
ENSMUST00000050867.8	-0.28288	5.90543	-3.15308	0.00664305	0.135922	-2.97501	NOT
ENSMUST00000135383.9	-0.329367	5.90633	-3.15199	0.00665785	0.136119	-2.97534	NOT
ENSMUST00000149967.9	-0.361825	7.97526	-3.34087	0.00452998	0.110807	-2.97588	NOT
ENSMUST00000106654.2	-0.980958	0.693531	-2.71069	0.0162383	0.22402	-2.9775	DOWN
ENSMUST00000154999.2	0.560247	1.35322	2.7521	0.0149467	0.214926	-2.97775	NOT
ENSMUST00000212606.2	-0.706869	3.1738	-2.87234	0.011737	0.189564	-2.97784	DOWN
ENSMUST00000119992.2	-0.621148	0.947221	-2.72336	0.0158321	0.221259	-2.97899	DOWN
ENSMUST00000021283.8	-0.245228	7.9727	-3.33994	0.00453865	0.110812	-2.98019	NOT
ENSMUST00000027933.11	1.24016	0.210305	2.69872	0.0166311	0.226164	-2.98202	UP
ENSMUST00000205311.2	-1.37985	0.40462	-2.69572	0.0167311	0.227147	-2.98308	DOWN
ENSMUST00000020991.15	-0.550412	5.36301	-3.0903	0.00754804	0.147167	-2.98398	NOT
ENSMUST00000011896.8	0.363388	6.7006	3.22854	0.00569649	0.1247	-2.98558	NOT
ENSMUST00000170335.4	1.77873	2.0517	2.79211	0.0137938	0.206968	-2.98566	UP
ENSMUST00000115588.8	0.664475	1.4602	2.75383	0.014895	0.214748	-2.98638	UP
ENSMUST00000111878.8	-0.552685	2.5546	-2.81825	0.0130879	0.201834	-2.98741	NOT
ENSMUST00000135967.2	1.13924	1.14393	2.73354	0.0155127	0.21834	-2.9917	UP
ENSMUST00000115007.9	-0.769668	1.75447	-2.75789	0.0147743	0.214561	-2.99226	DOWN
ENSMUST00000031286.13	-0.493903	7.67141	-3.30332	0.00489076	0.115163	-2.99227	NOT
ENSMUST00000234547.2	-0.370676	4.04383	-2.95158	0.0100009	0.174279	-2.99291	NOT
ENSMUST00000153733.2	1.37438	-0.0356951	2.68468	0.0171038	0.230012	-2.99392	UP
ENSMUST00000094041.4	0.876481	0.713373	2.70863	0.0163054	0.224617	-2.99733	UP
ENSMUST00000033326.10	1.09456	0.884858	2.71602	0.0160661	0.223103	-2.99915	UP
ENSMUST00000049167.14	-0.331899	5.55765	-3.10514	0.00732378	0.144511	-3.00029	NOT
ENSMUST00000211632.2	1.19687	0.549299	2.69973	0.0165976	0.226083	-3.00122	UP
ENSMUST00000110725.2	-0.189579	8.80221	-3.4053	0.00397176	0.101503	-3.00177	NOT
ENSMUST00000221368.2	-0.312987	5.52072	-3.10054	0.0073926	0.145084	-3.00217	NOT
ENSMUST00000209902.2	-1.58779	-0.144289	-2.67067	0.0175885	0.232627	-3.00281	DOWN
ENSMUST00000217999.2	0.925437	0.870441	2.71237	0.0161838	0.223602	-3.00388	UP
ENSMUST00000185521.2	-0.550972	1.66979	-2.74833	0.01506	0.215494	-3.00464	NOT
ENSMUST00000170578.3	-0.19915	7.51536	-3.28654	0.00506111	0.117368	-3.00617	NOT
ENSMUST00000142399.2	-1.03317	-1.32867	-2.65706	0.0180722	0.235606	-3.00709	DOWN
ENSMUST00000084030.6	-0.296006	6.64041	-3.20473	0.0059798	0.127748	-3.00893	NOT
ENSMUST00000194801.6	-1.23519	1.30998	-2.71713	0.0160306	0.222737	-3.00911	DOWN
ENSMUST00000131673.8	-0.441651	2.83488	-2.82991	0.0127844	0.199102	-3.00942	NOT
ENSMUST00000204239.3	-0.22174	8.28685	-3.35266	0.00442231	0.108618	-3.01267	NOT
ENSMUST00000235015.2	-0.805766	2.68271	-2.81015	0.0133028	0.203411	-3.01565	DOWN
ENSMUST00000165154.2	-0.979799	0.107402	-2.66938	0.0176339	0.232759	-3.01612	DOWN
ENSMUST00000069064.7	0.864832	0.810406	2.7022	0.0165161	0.225535	-3.01642	UP
ENSMUST00000111996.8	0.839922	3.30182	2.87683	0.0116312	0.188477	-3.01718	UP
ENSMUST00000080281.14	0.389421	3.60074	2.90296	0.0110338	0.183942	-3.01735	NOT
ENSMUST00000136655.3	-0.973112	-1.41674	-2.64981	0.018335	0.236998	-3.01822	DOWN
ENSMUST00000151235.2	-0.928285	0.166577	-2.67001	0.017612	0.232657	-3.0183	DOWN
ENSMUST00000055475.9	1.49109	-1.02755	2.65228	0.0182451	0.236386	-3.01884	UP
ENSMUST00000192409.2	0.704922	1.4668	2.73584	0.0154415	0.218216	-3.01912	UP
ENSMUST00000167731.8	0.693244	3.5849	2.90124	0.0110722	0.184112	-3.02115	UP
ENSMUST00000173975.2	0.928421	-0.354849	2.65979	0.0179741	0.235168	-3.02116	UP
ENSMUST00000113853.3	0.304358	6.01649	3.14605	0.00673879	0.137018	-3.02299	NOT
ENSMUST00000056635.13	-0.321994	5.75248	-3.113	0.00720764	0.14308	-3.02329	NOT
ENSMUST00000171163.2	0.78233	0.940207	2.70361	0.0164696	0.225535	-3.02466	UP
ENSMUST00000186822.2	-0.764442	0.940101	-2.69548	0.0167394	0.227154	-3.02482	DOWN
ENSMUST00000186574.7	0.654988	5.71761	3.11808	0.00713345	0.142383	-3.02503	UP
ENSMUST00000213273.2	1.00642	-0.301089	2.65764	0.0180513	0.235606	-3.02686	UP
ENSMUST00000111215.10	-0.422126	3.56619	-2.88575	0.0114238	0.187104	-3.02695	NOT
ENSMUST00000145112.9	-1.3749	0.0806688	-2.66109	0.0179278	0.235031	-3.02719	DOWN
ENSMUST00000147195.2	0.75682	-0.950137	2.64625	0.0184651	0.237903	-3.02877	UP
ENSMUST00000146483.8	-0.696683	2.2117	-2.76909	0.0144462	0.212132	-3.02892	DOWN
ENSMUST00000130539.8	0.546291	2.18479	2.77593	0.0142494	0.210906	-3.03097	NOT
ENSMUST00000138306.2	-0.632643	2.03125	-2.75509	0.0148576	0.214748	-3.03314	DOWN
ENSMUST00000124857.8	1.09142	1.01034	2.70276	0.0164977	0.225535	-3.03324	UP
ENSMUST00000123497.2	-0.788507	2.58892	-2.79302	0.0137687	0.206776	-3.03344	DOWN
ENSMUST00000137718.3	-0.641352	2.10153	-2.7568	0.0148067	0.214561	-3.03852	DOWN
ENSMUST00000030198.7	-0.574941	1.90107	-2.7435	0.0152067	0.215939	-3.03924	NOT
ENSMUST00000224829.2	-0.632263	2.00556	-2.74969	0.015019	0.215442	-3.03958	DOWN
ENSMUST00000097271.4	0.343605	5.64093	3.10131	0.00738105	0.144944	-3.04012	NOT
ENSMUST00000222404.2	1.13874	-1.95835	2.63452	0.0189011	0.240613	-3.04229	UP
ENSMUST00000097921.10	0.783828	2.12033	2.76626	0.0145284	0.212574	-3.04238	UP
ENSMUST00000148609.2	-0.679842	2.6976	-2.79776	0.0136382	0.205785	-3.04336	DOWN
ENSMUST00000126715.2	-1.02165	-0.369606	-2.64227	0.0186119	0.238288	-3.04394	DOWN
ENSMUST00000032802.5	-0.374846	5.11497	-3.03663	0.00841736	0.156758	-3.04468	NOT
ENSMUST00000152445.2	-1.25183	-1.75459	-2.63233	0.0189838	0.240834	-3.04579	DOWN
ENSMUST00000027800.15	-0.231666	8.42789	-3.34884	0.00445691	0.109304	-3.04598	NOT
ENSMUST00000002403.10	0.300121	5.08667	3.04112	0.0083411	0.156199	-3.04697	NOT
ENSMUST00000099128.2	0.628454	1.16696	2.70171	0.0165324	0.225591	-3.04863	UP
ENSMUST00000152890.8	-0.775658	1.1923	-2.69248	0.0168399	0.227688	-3.05133	DOWN
ENSMUST00000128339.8	0.556855	3.63813	2.88943	0.0113392	0.186344	-3.05189	NOT
ENSMUST00000172347.2	0.779658	-0.241386	2.64229	0.0186114	0.238288	-3.05342	UP
ENSMUST00000135893.2	-1.22867	-1.35556	-2.62597	0.0192253	0.242519	-3.05509	DOWN
ENSMUST00000165045.9	0.581735	5.14444	3.0444	0.0082857	0.155845	-3.05532	NOT
ENSMUST00000028190.13	-0.36952	6.87222	-3.2016	0.00601805	0.128398	-3.05563	NOT
ENSMUST00000088811.7	-0.351446	4.24614	-2.93951	0.010248	0.176205	-3.05634	NOT
ENSMUST00000037865.13	-0.297179	8.40426	-3.34069	0.00453169	0.110807	-3.05665	NOT
ENSMUST00000081728.7	-0.652563	1.84219	-2.72868	0.0156644	0.219627	-3.05701	DOWN
ENSMUST00000156690.8	-0.202939	8.02516	-3.30697	0.00485445	0.114931	-3.05731	NOT
ENSMUST00000106097.9	-0.808096	0.162971	-2.64622	0.0184663	0.237903	-3.05793	DOWN
ENSMUST00000238098.2	0.605397	2.10077	2.75432	0.0148804	0.214748	-3.05996	UP
ENSMUST00000067496.7	0.313506	5.26854	3.05242	0.00815188	0.154532	-3.0619	NOT
ENSMUST00000140592.8	-0.436831	3.11695	-2.82486	0.0129151	0.200613	-3.06397	NOT
ENSMUST00000106259.9	0.399739	7.02142	3.21849	0.00581438	0.126061	-3.06459	NOT
ENSMUST00000041111.10	0.301406	4.68109	2.98927	0.00926591	0.166058	-3.06462	NOT
ENSMUST00000156258.2	1.31231	0.0148727	2.64342	0.0185696	0.23821	-3.06489	UP
ENSMUST00000041524.11	-0.638494	1.28918	-2.69076	0.0168977	0.227908	-3.06605	DOWN
ENSMUST00000089162.5	-0.176321	8.89296	-3.38207	0.00416469	0.104162	-3.06627	NOT
ENSMUST00000140285.8	-0.666295	1.02131	-2.67589	0.0174065	0.231709	-3.06647	DOWN
ENSMUST00000111564.8	0.205529	6.66929	3.18369	0.00624164	0.131122	-3.06744	NOT
ENSMUST00000205224.2	-1.18481	-0.444556	-2.62542	0.019246	0.242519	-3.06869	DOWN
ENSMUST00000149430.8	-1.09006	-1.10606	-2.61808	0.019529	0.24395	-3.069	DOWN
ENSMUST00000156360.2	-1.13964	-1.11805	-2.61786	0.0195374	0.24395	-3.06915	DOWN
ENSMUST00000004396.13	0.277709	6.18191	3.13802	0.00684986	0.138662	-3.06956	NOT
ENSMUST00000023486.15	-0.439669	3.69273	-2.87468	0.0116817	0.189109	-3.07072	NOT
ENSMUST00000236557.2	0.260088	6.04336	3.12407	0.00704718	0.141262	-3.07118	NOT
ENSMUST00000052839.7	-0.374276	5.55461	-3.06795	0.00789872	0.151595	-3.07148	NOT
ENSMUST00000076657.11	0.381105	3.32605	2.8482	0.0123222	0.195145	-3.07157	NOT
ENSMUST00000212706.2	0.451263	5.24609	3.04601	0.0082586	0.155481	-3.0717	NOT
ENSMUST00000227012.2	-0.20383	6.65896	-3.17573	0.00634367	0.132275	-3.07278	NOT
ENSMUST00000060500.9	0.507653	3.22934	2.83903	0.0125518	0.197258	-3.07352	NOT
ENSMUST00000120143.8	0.454837	4.03629	2.91802	0.0107031	0.180438	-3.07355	NOT
ENSMUST00000197458.2	-0.622057	1.62823	-2.70492	0.0164267	0.225299	-3.07607	DOWN
ENSMUST00000033582.5	0.402601	3.46354	2.85824	0.0120754	0.193289	-3.07731	NOT
ENSMUST00000209537.2	-0.61358	5.51824	-3.0566	0.00808295	0.153492	-3.07937	DOWN
[truncated: 30,816 more rows]
