# Supplementary material for: Distinct microglia alternative splicing in Alzheimer's disease
Source: Aging (Albany NY). 2022 Aug 23;14(16):6554–66. doi: 10.18632/aging.204223 (PMC9467408; doi:10.18632/aging.204223)
Supplement: Supplementary Table 4 [file aging-14-204223-s004.xlsx]

## Sheet: Supplementary Table 4
Supplementary Table 4. List of 280 splicing factors.
TARDBP
SRRM1
PPP1R8
PPIE
PPIH
PRPF38A
SFRS11
PTBP2
PRPF38B
DDX20
TTF2
RBM8A
PRPF3
SCNM1
DHX9
HNRNPR
SYF2
DNAJC8
SFRS4
SNRNP40
SFPQ
LSM3
ASCC3L1
POLR2D
PRPF40A
CIR
SFRS7
LSM10
SF3A3
RPS13
MAGOH
ZRANB2
RBMX
GEMIN8
WDR77
SF3B4
TNRC4
IVNS1ABP
HNRNPU
CPSF3
DDX1
GEMIN6
SNRNP27
PCBP1
USP39
PPIG
SF3B14
PPM1G
POLR2H
RBM15B
PPP4R2
RSRC1
RBM5
TSEN2
BARD1
PPIL3
CLK1
SF3B1
ISY1
DBR1
SFRS10
NCBP2
POLR2B
LSM6
FRG1
DHX15
YTHDC1
HNRNPD
PLRG1
SKIV2L2
PPWD1
SFRS12
ZRSR2
DDX46
TCERG1
LSM8
TRA2A
SF3B5
BAT1
LSM2
SRPK1
PPIL1
SYNCRIP
SRRP35
SFRS18
DHX16
LSM11
SFRS12IP1
HNRNPA0
RBM22
GEMIN5
SLU7
HNRNPH1
PRPF4B
SNRNP48
SNRPC
SFRS3
CDC5L
CDC40
WTAP
QKI
DEK
PHF5A
NHP2L1
ZRSR2
RBM10
NONO
CSTF2
HNRNPH2
GEMIN8
SMC1A
UPF3B
THOC2
FUSIP1
SNRNP35
KIAA1429
PUF60
CPSF1
MELK
LSM1
KHDRBS3
POLR2K
TGS1
TRA2A
HNRNPA2B1
LSM5
POLR2J
SRPK2
RBM28
TNPO3
PRPF18
HNRNPK
RBM17
CUGBP2
YBX1
PRPF4
NCBP1
PSIP1
ZCCHC8
SFRS9
NHP2L1
SFRS8
CSTF3
CLP1
SMNDC1
DHX32
HNRNPF
WAC
HNRNPH3
CCAR1
UPF2
AQR
SNRPN
SNW1
NOVA1
RBM23
RBM25
SFRS5
PABPN1
UPF3A
PABPC1
WBP4
DHX9
PPAN
MORG1
UPF1
SNRPA
LSM7
SFRS15
U2AF1
SNRPD3
POLR2F
DGCR14
TFIP11
ZMAT5
SF3A1
RBM9
SIP1
PNN
PRPF39
LGALS3
CPSF2
PAPOLA
WDR25
BRUNOL6
SNUPN
SNRPA1
PRMT7
RNPS1
TSEN54
GEMIN4
PRPF8
C1QBP
EFTUD2
SNRNP25
SRRM2
A2BP1
FUS
POLR2C
NOL3
PSKH1
SF3B3
DHX38
LUC7L
POLR2G
SART1
SF3B2
RBM4
PCF11
POLR2L
WT1
CUGBP1
PRPF19
CPSF7
TRPT1
SF1
RBM4B
CLNS1A
CWC15
STRAP
PRPF40B
PCBP2
HNRNPA1
SNRPF
ARL6IP4
MAGOHB
WBP11
ZCRB1
SFRS2IP
DDX23
SART3
CD2BP2
NUDT21
TXNL4B
POLR2A
DHX8
CROP
DDX42
SFRS1
DDX5
SFRS2
EIF4A3
THOC4
SNRPD1
THOC1
BRUNOL4
TXNL4A
PTBP1
SF3A2
HNRNPM
UBL5
HNRNPUL1
SFRS16
GEMIN7
SNRNP70
SCAF1
PRPF31
TSEN34
U2AF2
POLR2E
KHSRP
XAB2
DDX39
LSM4
SFRS14
SF4
U2AF1L4
POLR2I
HNRNPL
SNRPD2
SNRPB2
RALY
DHX35
SFRS6
CSTF1
PRPF6
SNRPB
CRNKL1
RBM39
SON
